# Supplementary material for: Comprehensive study of serine/arginine-rich (SR) gene family in rice: characterization, evolution and expression analysis
Source: PeerJ journal article supplement (doi:10.7717/peerj.16193), 2023-10-13
Supplement: qRTPCR_raw_dataTableS9S16.zip [file Supplemental Table_S9.xlsx]

## Sheet: OsSCL30a
qRT-PCR raw data for tissue expression of OsSCL30a
Biological replicates	Sample Name	Technical replicates	Cq	Cq Mean (Technical replicates)	Cq Mean (Biological replicates)	ΔCq	2-ΔCq
1	Actin-root	1	26.98	27.07	26.94
		2	27.15
		3	27.08
2	Actin-root	1	26.81	26.72	26.94
		2	26.7
		3	26.65
3	Actin-root	1	27.07	27.04	26.94
		2	27.01
		3	27.04
1	Actin-stem	1	27.01	26.9	26.82
		2	26.87
		3	26.82
2	Actin-stem	1	26.71	26.71	26.82
		2	26.74
		3	26.68
3	Actin-stem	1	26.83	26.84	26.82
		2	26.96
		3	26.73
1	Actin-leaf	1	26.66	26.76	26.66
		2	26.85
		3	26.77
2	Actin-leaf	1	26.75	26.66	26.66
		2	26.58
		3	26.65
3	Actin-leaf	1	26.53	26.57	26.66
		2	26.5
		3	26.68
1	Actin-DBF	1	26.93	27.01	27.01
		2	26.97
		3	27.13
2	Actin-DBF	1	27.11	27.01	27.01
		2	26.93
		3	26.99
3	Actin-DBF	1	26.98	27	27.01
		2	27.08
		3	26.94
1	Actin-DF	1	27.17	27.22	27.14
		2	27.19
		3	27.3
2	Actin-DF	1	27.2	27.29	27.14
		2	27.26
		3	27.41
3	Actin-DF	1	26.97	26.91	27.14
		2	26.9
		3	26.86
1	Actin-5DAF	1	27.51	27.6	27.35
		2	27.59
		3	27.7
2	Actin-5DAF	1	27.6	27.56	27.35
		2	27.63
		3	27.45
3	Actin-5DAF	1	26.97	26.89	27.35
		2	26.8
		3	26.9
1	Actin-10DAF	1	24.62	24.69	24.76
		2	24.8
		3	24.65
2	Actin-10DAF	1	24.76	24.84	24.76
		2	24.93
		3	24.83
3	Actin-10DAF	1	24.73	24.75	24.76
		2	24.82
		3	24.7
1	Actin-20DAF	1	21.46	21.35	21.42
		2	21.24
		3	21.35
2	Actin-20DAF	1	21.23	21.25	21.42
		2	21.38
		3	21.14
3	Actin-20DAF	1	21.69	21.67	21.42
		2	21.67
		3	21.65
1	OsSCL30a-root	1	29.87	29.89		2.94667	0.129707
		2	29.89
		3	29.91
2	OsSCL30a-root	1	30.34	30.32		3.37667	0.0962769
		2	30.22
		3	30.4
3	OsSCL30a-root	1	30.04	29.98		3.03667	0.121863
		2	30.01
		3	29.89
1	OsSCL30a-stem	1	28.47	28.45		1.63333	0.322343
		2	28.48
		3	28.4
2	OsSCL30a-stem	1	28.515	28.495		1.67833	0.312595
		2	28.445
		3	28.525
3	OsSCL30a-stem	1	28.48	28.54		1.72333	0.302848
		2	28.56
		3	28.58
1	OsSCL30a-leaf	1	27.41	27.51		0.846667	0.556068
		2	27.56
		3	27.56
2	OsSCL30a-leaf	1	27.5	27.5		0.836667	0.559936
		2	27.57
		3	27.43
3	OsSCL30a-leaf	1	27.56	27.59		0.926667	0.526072
		2	27.63
		3	27.58
1	OsSCL30a-DBF	1	29.43	29.51		2.50333	0.176369
		2	29.61
		3	29.49
2	OsSCL30a-DBF	1	29.68	29.63		2.62333	0.162292
		2	29.59
		3	29.62
3	OsSCL30a-DBF	1	29.29	29.25		2.24333	0.211198
		2	29.23
		3	29.23
1	OsSCL30a-F	1	29.13	29.22		2.08	0.236514
		2	29.23
		3	29.3
2	OsSCL30a-F	1	29.57	29.62		2.48	0.179244
		2	29.64
		3	29.65
3	OsSCL30a-F	1	29.18	29.27		2.13	0.228458
		2	29.23
		3	29.4
1	OsSCL30a-5DAF	1	30.22	30.31		2.96	0.128514
		2	30.43
		3	30.28
2	OsSCL30a-5DAF	1	30.36	30.38		3.03	0.122428
		2	30.51
		3	30.27
3	OsSCL30a-5DAF	1	30.28	30.27		2.92	0.132127
		2	30.29
		3	30.24
1	OsSCL30a-10DAF	1	27.86	27.84		3.08	0.118257
		2	27.79
		3	27.87
2	OsSCL30a-10DAF	1	27.76	27.76		3	0.125
		2	27.78
		3	27.74
3	OsSCL30a-10DAF	1	27.72	27.8		3.04	0.121582
		2	27.78
		3	27.9
1	OsSCL30a-20DAF	1	24.67	24.64		3.21667	0.107569
		2	24.64
		3	24.61
2	OsSCL30a-20DAF	1	24.535	24.505		3.08167	0.118638
		2	24.475
		3	24.505
3	OsSCL30a-20DAF	1	24.39	24.37		2.94667	0.129707
		2	24.29
		3	24.43

## Sheet: OsSCL30
qRT-PCR raw data for tissue expression of OsSCL30
Biological replicates	Sample Name	Technical replicates	Cq (Technical replicates)	Cq	Cq Mean	ΔCq	2-ΔCq
1	Actin-root	1	27.03	27.05	26.87
		2	27.02
		3	27.1
2	Actin-root	1	26.76	26.73	26.87
		2	26.78
		3	26.65
3	Actin-root	1	26.9	26.82	26.87
		2	26.81
		3	26.75
1	Actin-stem	1	26.05	26.1	26.05
		2	26.06
		3	26.19
2	Actin-stem	1	25.98	25.98	26.05
		2	25.95
		3	26.01
3	Actin-stem	1	26.04	26.06	26.05
		2	26.16
		3	25.98
1	Actin-leaf	1	27.25	27.17	27.18
		2	27.06
		3	27.2
2	Actin-leaf	1	27.27	27.21	27.18
		2	27.12
		3	27.24
3	Actin-leaf	1	27.17	27.15	27.18
		2	27.13
		3	27.15
1	Actin-DBF	1	27.1	27.21	27.03
		2	27.23
		3	27.3
2	Actin-DBF	1	26.91	26.95	27.03
		2	26.91
		3	27.03
3	Actin-DBF	1	26.98	26.92	27.03
		2	26.96
		3	26.82
1	Actin-DF	1	27.37	27.43	27.49
		2	27.47
		3	27.45
2	Actin-DF	1	27.64	27.54	27.49
		2	27.5
		3	27.48
3	Actin-DF	1	27.51	27.51	27.49
		2	27.47
		3	27.55
1	Actin-5DAF	1	27.74	27.8	27.55
		2	27.87
		3	27.79
2	Actin-5DAF	1	27.36	27.47	27.55
		2	27.52
		3	27.53
3	Actin-5DAF	1	27.37	27.37	27.55
		2	27.3
		3	27.44
1	Actin-10DAF	1	23.86	23.97	23.96
		2	23.97
		3	24.08
2	Actin-10DAF	1	24.25	24.13	23.96
		2	24.05
		3	24.09
3	Actin-10DAF	1	23.89	23.79	23.96
		2	23.75
		3	23.73
1	Actin-20DAF	1	23.61	23.64	23.63
		2	23.72
		3	23.59
2	Actin-20DAF	1	23.63	23.53	23.63
		2	23.46
		3	23.5
3	Actin-20DAF	1	23.72	23.72	23.63
		2	23.74
		3	23.7
1	OsSCL30-root	1	28.59	28.59		1.72	0.303549
		2	28.67
		3	28.51
2	OsSCL30-root	1	28.81	28.77		1.9	0.267943
		2	28.71
		3	28.79
3	OsSCL30-root	1	28.18	28.16		1.29	0.408951
		2	28.09
		3	28.21
1	OsSCL30-stem	1	27.8	27.74		1.69	0.309927
		2	27.7
		3	27.72
2	OsSCL30-stem	1	27.76	27.76		1.71	0.30566
		2	27.77
		3	27.75
3	OsSCL30-stem	1	27.9	27.85		1.8	0.287175
		2	27.82
		3	27.83
1	OsSCL30-leaf	1	28.59	28.51		1.33	0.397768
		2	28.48
		3	28.46
2	OsSCL30-leaf	1	28.48	28.49		1.31	0.403321
		2	28.44
		3	28.55
3	OsSCL30-leaf	1	28.5	28.47		1.29	0.408951
		2	28.42
		3	28.49
1	OsSCL30-DBF	1	29.23	29.27		2.24	0.211686
		2	29.4
		3	29.18
2	OsSCL30-DBF	1	29.48	29.52		2.49	0.178006
		2	29.63
		3	29.45
3	OsSCL30-DBF	1	29.54	29.48		2.45	0.183011
		2	29.5
		3	29.4
1	OsSCL30-F	1	29.94	29.89		2.4	0.189465
		2	29.86
		3	29.87
2	OsSCL30-F	1	29.88	29.91		2.42	0.186856
		2	29.97
		3	29.88
3	OsSCL30-F	1	29.53	29.58		2.09	0.234881
		2	29.55
		3	29.66
1	OsSCL30-5DAF	1	31.13	31.2		3.65	0.07966
		2	31.15
		3	31.32
2	OsSCL30-5DAF	1	30.9	30.9		3.35	0.098073
		2	30.96
		3	30.84
3	OsSCL30-5DAF	1	30.69	30.6		3.05	0.120742
		2	30.55
		3	30.56
1	OsSCL30-10DAF	1	26.57	26.47		2.51	0.175556
		2	26.45
		3	26.39
2	OsSCL30-10DAF	1	26.43	26.54		2.58	0.167241
		2	26.64
		3	26.55
3	OsSCL30-10DAF	1	26.44	26.44		2.48	0.179244
		2	26.48
		3	26.4
1	OsSCL30-20DAF	1	25.95	25.96		2.33	0.198884
		2	26.01
		3	25.92
2	OsSCL30-20DAF	1	25.89	25.96		2.33	0.198884
		2	26.01
		3	25.98
3	OsSCL30-20DAF	1	25.86	25.83		2.2	0.217638
		2	25.85
		3	25.78

## Sheet: OsSCL57
qRT-PCR raw data for tissue expression of OsSCL57
Biological replicates	Sample Name	Technical replicates	Cq (Technical replicates)	Cq	Cq Mean	ΔCq	2-ΔCq
1	Actin-root	1	25.74	25.72	26.03
		2	25.74
		3	25.68
2	Actin-root	1	26.03	26.04	26.03
		2	26.04
		3	26.05
3	Actin-root	1	26.22	26.33	26.03
		2	26.41
		3	26.36
1	Actin-stem	1	23.52	23.44	23.79
		2	23.47
		3	23.33
2	Actin-stem	1	24.04	24.09	23.79
		2	24.16
		3	24.07
3	Actin-stem	1	23.94	23.83	23.79
		2	23.79
		3	23.76
1	Actin-leaf	1	24.16	24.14	24.05
		2	24.1
		3	24.16
2	Actin-leaf	1	23.96	23.98	24.05
		2	23.87
		3	24.11
3	Actin-leaf	1	23.95	24.04	24.05
		2	24.15
		3	24.02
1	Actin-DBF	1	25.65	25.71	25.62
		2	25.75
		3	25.73
2	Actin-DBF	1	25.69	25.56	25.62
		2	25.52
		3	25.47
3	Actin-DBF	1	25.5	25.59	25.62
		2	25.58
		3	25.69
1	Actin-DF	1	25.42	25.37	25.49
		2	25.26
		3	25.43
2	Actin-DF	1	25.53	25.53	25.49
		2	25.5
		3	25.56
3	Actin-DF	1	25.63	25.56	25.49
		2	25.54
		3	25.51
1	Actin-5DAF	1	23.98	23.93	23.9
		2	23.83
		3	23.98
2	Actin-5DAF	1	23.97	23.85	23.9
		2	23.75
		3	23.83
3	Actin-5DAF	1	24.03	23.93	23.9
		2	23.93
		3	23.83
1	Actin-10DAF	1	24.65	24.64	24.58
		2	24.68
		3	24.59
2	Actin-10DAF	1	24.46	24.56	24.58
		2	24.56
		3	24.66
3	Actin-10DAF	1	24.45	24.53	24.58
		2	24.66
		3	24.48
1	Actin-20DAF	1	25.6	25.6	25.59
		2	25.52
		3	25.68
2	Actin-20DAF	1	25.59	25.66	25.59
		2	25.73
		3	25.66
3	Actin-20DAF	1	25.4	25.5	25.59
		2	25.51
		3	25.59
1	OsSCL57-root	1	28.97	28.91		2.88	0.135842
		2	28.88
		3	28.88
2	OsSCL57-root	1	28.35	28.39		2.36	0.194791
		2	28.47
		3	28.35
3	OsSCL57-root	1	28.64	28.71		2.68	0.156041
		2	28.79
		3	28.7
1	OsSCL57-stem	1	25.35	25.32		1.53	0.346277
		2	25.21
		3	25.4
2	OsSCL57-stem	1	24.9	25.01		1.22	0.429283
		2	25.07
		3	25.06
3	OsSCL57-stem	1	24.75	24.8		1.01	0.496546
		2	24.72
		3	24.93
1	OsSCL57-leaf	1	26.37	26.44		2.39	0.190782
		2	26.51
		3	26.44
2	OsSCL57-leaf	1	25.86	25.94		1.89	0.269807
		2	26.02
		3	25.94
3	OsSCL57-leaf	1	25.81	25.89		1.84	0.279322
		2	25.97
		3	25.89
1	OsSCL57-DBF	1	28.62	28.7		3.08	0.118257
		2	28.71
		3	28.77
2	OsSCL57-DBF	1	28.58	28.47		2.85	0.138696
		2	28.4
		3	28.43
3	OsSCL57-DBF	1	28.49	28.51		2.89	0.134904
		2	28.62
		3	28.42
1	OsSCL57-F	1	27.23	27.31		1.82	0.283221
		2	27.32
		3	27.38
2	OsSCL57-F	1	27.18	27.22		1.73	0.301452
		2	27.22
		3	27.26
3	OsSCL57-F	1	27.09	27.17		1.68	0.312083
		2	27.24
		3	27.18
1	OsSCL57-5DAF	1	27.19	27.09		3.19	0.109576
		2	27.07
		3	27.01
2	OsSCL57-5DAF	1	27.23	27.3		3.4	0.0947323
		2	27.4
		3	27.27
3	OsSCL57-5DAF	1	27.07	27.07		3.17	0.111105
		2	27.08
		3	27.06
1	OsSCL57-10DAF	1	29.38	29.46		4.88	0.0339605
		2	29.49
		3	29.51
2	OsSCL57-10DAF	1	29.42	29.38		4.8	0.0358968
		2	29.34
		3	29.38
3	OsSCL57-10DAF	1	29.42	29.46		4.88	0.0339605
		2	29.44
		3	29.52
1	OsSCL57-20DAF	1	30.61	30.66		5.07	0.0297699
		2	30.69
		3	30.68
2	OsSCL57-20DAF	1	30.65	30.52		4.93	0.0328036
		2	30.48
		3	30.43
3	OsSCL57-20DAF	1	30.68	30.79		5.2	0.0272047
		2	30.92
		3	30.77

## Sheet: OsSCL28
qRT-PCR raw data for tissue expression of OsSCL28
Biological replicates	Sample Name	Technical replicates	Cq (Technical replicates)	Cq	Cq Mean	ΔCq	2-ΔCq
1	Actin-root	1	26.66	26.64	26.68
		2	26.56
		3	26.7
2	Actin-root	1	26.75	26.78	26.68
		2	26.89
		3	26.7
3	Actin-root	1	26.56	26.61	26.68
		2	26.68
		3	26.59
1	Actin-stem	1	29.01	28.99	29.12
		2	29.01
		3	28.95
2	Actin-stem	1	29.41	29.41	29.12
		2	29.35
		3	29.47
3	Actin-stem	1	28.93	28.97	29.12
		2	29.06
		3	28.92
1	Actin-leaf	1	26.33	26.3	26.21
		2	26.3
		3	26.27
2	Actin-leaf	1	26.13	26.23	26.21
		2	26.2
		3	26.36
3	Actin-leaf	1	26.1	26.1	26.21
		2	26.17
		3	26.03
1	Actin-DBF	1	26.73	26.79	26.79
		2	26.83
		3	26.81
2	Actin-DBF	1	26.84	26.81	26.79
		2	26.87
		3	26.72
3	Actin-DBF	1	26.77	26.76	26.79
		2	26.72
		3	26.79
1	Actin-DF	1	26.44	26.49	26.78
		2	26.57
		3	26.46
2	Actin-DF	1	27	26.97	26.78
		2	27.03
		3	26.88
3	Actin-DF	1	26.9	26.88	26.78
		2	26.95
		3	26.79
1	Actin-5DAF	1	27.1	27.19	27.28
		2	27.31
		3	27.16
2	Actin-5DAF	1	27.18	27.26	27.28
		2	27.28
		3	27.32
3	Actin-5DAF	1	27.39	27.39	27.28
		2	27.42
		3	27.36
1	Actin-10DAF	1	24.58	24.46	24.54
		2	24.4
		3	24.4
2	Actin-10DAF	1	24.66	24.55	24.54
		2	24.52
		3	24.47
3	Actin-10DAF	1	24.56	24.62	24.54
		2	24.62
		3	24.68
1	Actin-20DAF	1	21.34	21.3	21.28
		2	21.22
		3	21.34
2	Actin-20DAF	1	21.33	21.23	21.28
		2	21.19
		3	21.17
3	Actin-20DAF	1	21.41	21.31	21.28
		2	21.2
		3	21.32
1	OsSCL28-root	1	30.95	31.01		4.33333	0.0496063
		2	31.09
		3	30.99
2	OsSCL28-root	1	30.66	30.67		3.99333	0.0627895
		2	30.79
		3	30.56
3	OsSCL28-root	1	31.1	31		4.32333	0.0499513
		2	30.89
		3	31.01
1	OsSCL28-stem	1	27.67	27.6		-1.52333	2.87454
		2	27.51
		3	27.62
2	OsSCL28-stem	1	27.28	27.22		-1.90333	3.74076
		2	27.16
		3	27.22
3	OsSCL28-stem	1	27.59	27.52		-1.60333	3.03845
		2	27.51
		3	27.46
1	OsSCL28-leaf	1	28.71	28.77		2.56	0.169576
		2	28.8
		3	28.8
2	OsSCL28-leaf	1	28.18	28.22		2.01	0.248273
		2	28.29
		3	28.19
3	OsSCL28-leaf	1	28.14	28.17		1.96	0.257028
		2	28.19
		3	28.18
1	OsSCL28-DBF	1	27.76	27.86		1.07333	0.47522
		2	27.97
		3	27.85
2	OsSCL28-DBF	1	28.44	28.34		1.55333	0.340722
		2	28.33
		3	28.25
3	OsSCL28-DBF	1	28.36	28.42		1.63333	0.322343
		2	28.46
		3	28.44
1	OsSCL28-F	1	29.88	29.87		3.09	0.11744
		2	29.85
		3	29.88
2	OsSCL28-F	1	30.06	29.94		3.16	0.111878
		2	29.92
		3	29.84
3	OsSCL28-F	1	29.52	29.54		2.76	0.147624
		2	29.58
		3	29.52
1	OsSCL28-5DAF	1	29.08	29.12		1.84	0.279322
		2	29.13
		3	29.15
2	OsSCL28-5DAF	1	29.09	28.99		1.71	0.30566
		2	28.96
		3	28.92
3	OsSCL28-5DAF	1	28.97	28.94		1.66	0.316439
		2	28.85
		3	29
1	OsSCL28-10DAF	1	28.68	28.58		4.03667	0.0609316
		2	28.56
		3	28.5
2	OsSCL28-10DAF	1	28.82	28.83		4.28667	0.0512371
		2	28.78
		3	28.89
3	OsSCL28-10DAF	1	29.04	28.97		4.42667	0.0464987
		2	28.98
		3	28.89
1	OsSCL28-20DAF	1	28.71	28.76		7.48	0.00560139
		2	28.78
		3	28.79
2	OsSCL28-20DAF	1	28.28	28.3		7.02	0.00770494
		2	28.43
		3	28.19
3	OsSCL28-20DAF	1	28.81	28.71		7.43	0.00579892
		2	28.61
		3	28.71

## Sheet: OsSCL25
qRT-PCR raw data for tissue expression of OsSCL25
Biological replicates	Sample Name	Technical replicates	Cq (Technical replicates)	Cq	Cq Mean	ΔCq	2-ΔCq
1	Actin-root	1	26.67	26.64	26.68
		2	26.71
		3	26.54
2	Actin-root	1	26.82	26.78	26.68
		2	26.73
		3	26.79
3	Actin-root	1	26.65	26.61	26.68
		2	26.62
		3	26.56
1	Actin-stem	1	28.99	28.99	29.12
		2	28.93
		3	29.05
2	Actin-stem	1	29.46	29.41	29.12
		2	29.36
		3	29.41
3	Actin-stem	1	28.92	28.97	29.12
		2	29.08
		3	28.91
1	Actin-leaf	1	26.33	26.3	26.21
		2	26.24
		3	26.33
2	Actin-leaf	1	26.13	26.23	26.21
		2	26.25
		3	26.31
3	Actin-leaf	1	26.08	26.1	26.21
		2	26.16
		3	26.06
1	Actin-DBF	1	26.77	26.79	26.79
		2	26.77
		3	26.83
2	Actin-DBF	1	26.74	26.81	26.79
		2	26.91
		3	26.78
3	Actin-DBF	1	26.75	26.76	26.79
		2	26.76
		3	26.77
1	Actin-DF	1	26.46	26.49	26.78
		2	26.6
		3	26.41
2	Actin-DF	1	26.87	26.97	26.78
		2	27.04
		3	27
3	Actin-DF	1	26.77	26.88	26.78
		2	26.86
		3	27.01
1	Actin-5DAF	1	27.2	27.19	27.28
		2	27.22
		3	27.15
2	Actin-5DAF	1	27.37	27.26	27.28
		2	27.22
		3	27.19
3	Actin-5DAF	1	27.51	27.39	27.28
		2	27.31
		3	27.35
1	Actin-10DAF	1	24.46	24.46	24.54
		2	24.35
		3	24.57
2	Actin-10DAF	1	24.51	24.55	24.54
		2	24.63
		3	24.51
3	Actin-10DAF	1	24.7	24.62	24.54
		2	24.56
		3	24.6
1	Actin-20DAF	1	21.25	21.3	21.28
		2	21.35
		3	21.3
2	Actin-20DAF	1	21.26	21.23	21.28
		2	21.24
		3	21.19
3	Actin-20DAF	1	21.44	21.31	21.28
		2	21.2
		3	21.29
1	OsSCL25-root	1	28.31	28.24		1.56333	0.338368
		2	28.15
		3	28.26
2	OsSCL25-root	1	28.33	28.31		1.63333	0.322343
		2	28.33
		3	28.27
3	OsSCL25-root	1	28.31	28.35		1.67333	0.313528
		2	28.48
		3	28.26
1	OsSCL25-stem	1	28.87	28.88		-0.243333	1.18372
		2	28.98
		3	28.79
2	OsSCL25-stem	1	28.4	28.32		-0.803333	1.74513
		2	28.35
		3	28.21
3	OsSCL25-stem	1	27.96	28.05		-1.07333	2.10429
		2	28.01
		3	28.18
1	OsSCL25-leaf	1	26.32	26.43		0.22	0.858565
		2	26.47
		3	26.5
2	OsSCL25-leaf	1	26.17	26.15		-0.06	1.04247
		2	26.22
		3	26.06
3	OsSCL25-leaf	1	26.26	26.3		0.09	0.939523
		2	26.43
		3	26.21
1	OsSCL25-DBF	1	25.28	25.32		-1.46667	2.76383
		2	25.32
		3	25.36
2	OsSCL25-DBF	1	25.2	25.25		-1.53667	2.90123
		2	25.32
		3	25.23
3	OsSCL25-DBF	1	24.95	25.03		-1.75667	3.37916
		2	25.04
		3	25.1
1	OsSCL25-F	1	28.14	28.05		1.27	0.41466
		2	28.06
		3	27.95
2	OsSCL25-F	1	28.25	28.23		1.45	0.366021
		2	28.12
		3	28.32
3	OsSCL25-F	1	28.16	28.23		1.45	0.366021
		2	28.18
		3	28.35
1	OsSCL25-5DAF	1	29.88	29.95		2.67	0.157127
		2	29.99
		3	29.98
2	OsSCL25-5DAF	1	30.66	30.63		3.35	0.098073
		2	30.59
		3	30.64
3	OsSCL25-5DAF	1	30.47	30.48		3.2	0.108819
		2	30.39
		3	30.58
1	OsSCL25-10DAF	1	28.15	28.07		3.52667	0.0867696
		2	28.09
		3	27.97
2	OsSCL25-10DAF	1	28.25	28.26		3.71667	0.0760627
		2	28.32
		3	28.21
3	OsSCL25-10DAF	1	27.77	27.83		3.28667	0.102474
		2	27.93
		3	27.79
1	OsSCL25-20DAF	1	24.14	24.15		2.87	0.136787
		2	24.14
		3	24.17
2	OsSCL25-20DAF	1	24.1	24.16		2.88	0.135842
		2	24.14
		3	24.24
3	OsSCL25-20DAF	1	24.21	24.16		2.88	0.135842
		2	24.14
		3	24.13

## Sheet: OsSCL26
qRT-PCR raw data for tissue expression of OsSCL26
Biological replicates	Sample Name	Technical replicates	Cq (Technical replicates)	Cq	Cq Mean	ΔCq	2-ΔCq
1	Actin-root	1	27.03	27.07	27.09
		2	27.19
		3	26.99
2	Actin-root	1	27.18	27.07	27.09
		2	27.05
		3	26.98
3	Actin-root	1	27.13	27.13	27.09
		2	27.11
		3	27.15
1	Actin-stem	1	28.78	28.71	28.92
		2	28.66
		3	28.69
2	Actin-stem	1	29	28.9	28.92
		2	28.82
		3	28.88
3	Actin-stem	1	29.1	29.15	28.92
		2	29.26
		3	29.09
1	Actin-leaf	1	26.67	26.71	26.8
		2	26.72
		3	26.74
2	Actin-leaf	1	26.8	26.85	26.8
		2	26.96
		3	26.79
3	Actin-leaf	1	26.73	26.83	26.8
		2	26.88
		3	26.88
1	Actin-DBF	1	27.66	27.64	27.54
		2	27.65
		3	27.61
2	Actin-DBF	1	27.65	27.62	27.54
		2	27.54
		3	27.67
3	Actin-DBF	1	27.37	27.36	27.54
		2	27.32
		3	27.39
1	Actin-DF	1	27.46	27.53	27.54
		2	27.58
		3	27.55
2	Actin-DF	1	27.58	27.64	27.54
		2	27.72
		3	27.62
3	Actin-DF	1	27.44	27.44	27.54
		2	27.42
		3	27.46
1	Actin-5DAF	1	27.32	27.39	27.54
		2	27.35
		3	27.5
2	Actin-5DAF	1	27.49	27.53	27.54
		2	27.53
		3	27.57
3	Actin-5DAF	1	27.6	27.69	27.54
		2	27.78
		3	27.69
1	Actin-10DAF	1	25.48	25.37	25.38
		2	25.27
		3	25.36
2	Actin-10DAF	1	25.39	25.38	25.38
		2	25.46
		3	25.29
3	Actin-10DAF	1	25.44	25.38	25.38
		2	25.4
		3	25.3
1	Actin-20DAF	1	22.78	22.79	22.78
		2	22.71
		3	22.88
2	Actin-20DAF	1	22.72	22.69	22.78
		2	22.62
		3	22.73
3	Actin-20DAF	1	22.76	22.85	22.78
		2	22.94
		3	22.85
1	OsSCL26-root	1	29.19	29.26		2.17	0.222211
		2	29.38
		3	29.21
2	OsSCL26-root	1	29.07	29.09		2	0.25
		2	29.22
		3	28.98
3	OsSCL26-root	1	29.27	29.28		2.19	0.219151
		2	29.32
		3	29.25
1	OsSCL26-stem	1	29.98	30.09		1.17	0.444421
		2	30.19
		3	30.1
2	OsSCL26-stem	1	29.39	29.47		0.55	0.68302
		2	29.54
		3	29.48
3	OsSCL26-stem	1	30.41	30.45		1.53	0.346277
		2	30.38
		3	30.56
1	OsSCL26-leaf	1	27.18	27.14		0.34	0.790041
		2	27.2
		3	27.04
2	OsSCL26-leaf	1	27.48	27.44		0.64	0.641713
		2	27.41
		3	27.43
3	OsSCL26-leaf	1	26.89	26.99		0.19	0.876606
		2	27.11
		3	26.97
1	OsSCL26-DBF	1	27.1	27.21		-0.33	1.25701
		2	27.23
		3	27.3
2	OsSCL26-DBF	1	27.58	27.52		-0.02	1.01396
		2	27.52
		3	27.46
3	OsSCL26-DBF	1	27.58	27.59		0.05	0.965936
		2	27.57
		3	27.62
1	OsSCL26-F	1	28.56	28.66		1.12	0.460094
		2	28.7
		3	28.72
2	OsSCL26-F	1	28.86	28.89		1.35	0.392292
		2	28.98
		3	28.83
3	OsSCL26-F	1	28.79	28.8		1.26	0.417544
		2	28.92
		3	28.69
1	OsSCL26-5DAF	1	29.95	30.02		2.48	0.179244
		2	30.02
		3	30.09
2	OsSCL26-5DAF	1	30.08	30.19		2.65	0.15932
		2	30.25
		3	30.24
3	OsSCL26-5DAF	1	29.93	30.01		2.47	0.180491
		2	30.02
		3	30.08
1	OsSCL26-10DAF	1	26.4	26.51		1.13	0.456916
		2	26.61
		3	26.52
2	OsSCL26-10DAF	1	26.51	26.44		1.06	0.479632
		2	26.34
		3	26.47
3	OsSCL26-10DAF	1	26.61	26.62		1.24	0.423373
		2	26.71
		3	26.54
1	OsSCL26-20DAF	1	24.49	24.6		1.82	0.283221
		2	24.72
		3	24.59
2	OsSCL26-20DAF	1	24.4	24.47		1.69	0.309927
		2	24.49
		3	24.52
3	OsSCL26-20DAF	1	24.11	24.2		1.42	0.373712
		2	24.21
		3	24.28

## Sheet: OsSC32
qRT-PCR raw data for tissue expression of OsSC32
Biological replicates	Sample Name	Technical replicates	Cq (Technical replicates)	Cq	Cq Mean	ΔCq	2-ΔCq
1	Actin-root	1	26.44	26.38	26.38
		2	26.28
		3	26.42
2	Actin-root	1	26.38	26.37	26.38
		2	26.46
		3	26.27
3	Actin-root	1	26.43	26.39	26.38
		2	26.29
		3	26.45
1	Actin-stem	1	25.99	25.91	25.75
		2	25.9
		3	25.84
2	Actin-stem	1	25.59	25.54	25.75
		2	25.58
		3	25.45
3	Actin-stem	1	25.72	25.8	25.75
		2	25.85
		3	25.83
1	Actin-leaf	1	26.8	26.73	26.61
		2	26.64
		3	26.75
2	Actin-leaf	1	26.45	26.56	26.61
		2	26.57
		3	26.66
3	Actin-leaf	1	26.67	26.55	26.61
		2	26.5
		3	26.48
1	Actin-DBF	1	27.67	27.64	27.45
		2	27.58
		3	27.67
2	Actin-DBF	1	27.27	27.34	27.45
		2	27.4
		3	27.35
3	Actin-DBF	1	27.34	27.36	27.45
		2	27.42
		3	27.32
1	Actin-DF	1	27.81	27.8	27.63
		2	27.77
		3	27.82
2	Actin-DF	1	27.44	27.51	27.63
		2	27.62
		3	27.47
3	Actin-DF	1	27.57	27.59	27.63
		2	27.63
		3	27.57
1	Actin-5DAF	1	27.46	27.52	27.56
		2	27.57
		3	27.53
2	Actin-5DAF	1	27.71	27.58	27.56
		2	27.53
		3	27.5
3	Actin-5DAF	1	27.63	27.59	27.56
		2	27.58
		3	27.56
1	Actin-10DAF	1	24.69	24.73	24.84
		2	24.65
		3	24.85
2	Actin-10DAF	1	24.96	24.98	24.84
		2	24.87
		3	25.11
3	Actin-10DAF	1	24.81	24.8	24.84
		2	24.78
		3	24.81
1	Actin-20DAF	1	22.68	22.7	22.76
		2	22.74
		3	22.68
2	Actin-20DAF	1	22.71	22.79	22.76
		2	22.86
		3	22.8
3	Actin-20DAF	1	22.86	22.8	22.76
		2	22.75
		3	22.79
1	OsSC32-root	1	28.23	28.31		1.93	0.262429
		2	28.3
		3	28.4
2	OsSC32-root	1	28.45	28.45		2.07	0.238159
		2	28.4
		3	28.5
3	OsSC32-root	1	28.43	28.36		1.98	0.25349
		2	28.29
		3	28.36
1	OsSC32-stem	1	27.07	26.96		1.21	0.432269
		2	26.96
		3	26.85
2	OsSC32-stem	1	26.33	26.27		0.52	0.697372
		2	26.22
		3	26.26
3	OsSC32-stem	1	26.43	26.54		0.79	0.578344
		2	26.55
		3	26.64
1	OsSC32-leaf	1	25.92	25.88		-0.733333	1.66248
		2	25.87
		3	25.85
2	OsSC32-leaf	1	25.49	25.53		-1.08333	2.11893
		2	25.55
		3	25.55
3	OsSC32-leaf	1	25.51	25.62		-0.993333	1.99078
		2	25.69
		3	25.66
1	OsSC32-DBF	1	27.9	27.82		0.373333	0.771997
		2	27.72
		3	27.84
2	OsSC32-DBF	1	27.96	27.85		0.403333	0.756109
		2	27.75
		3	27.84
3	OsSC32-DBF	1	27.74	27.82		0.373333	0.771997
		2	27.92
		3	27.8
1	OsSC32-F	1	28.31	28.41		0.776667	0.583714
		2	28.41
		3	28.51
2	OsSC32-F	1	28.87	28.75		1.11667	0.461158
		2	28.67
		3	28.71
3	OsSC32-F	1	28.42	28.42		0.786667	0.579682
		2	28.4
		3	28.44
1	OsSC32-5DAF	1	29.94	29.94		2.37667	0.192554
		2	29.92
		3	29.96
2	OsSC32-5DAF	1	30.03	29.95		2.38667	0.191224
		2	29.89
		3	29.93
3	OsSC32-5DAF	1	29.95	29.93		2.36667	0.193893
		2	29.85
		3	29.99
1	OsSC32-10DAF	1	26.24	26.16		1.32333	0.399611
		2	26.17
		3	26.07
2	OsSC32-10DAF	1	26.07	26.17		1.33333	0.39685
		2	26.21
		3	26.23
3	OsSC32-10DAF	1	26.03	25.94		1.10333	0.46544
		2	25.9
		3	25.89
1	OsSC32-20DAF	1	24.02	24.08		1.31667	0.401461
		2	24.05
		3	24.17
2	OsSC32-20DAF	1	23.95	23.9		1.13667	0.454809
		2	23.9
		3	23.85
3	OsSC32-20DAF	1	23.78	23.78		1.01667	0.494257
		2	23.88
		3	23.68

## Sheet: OsSC34
qRT-PCR raw data for tissue expression of OsSC34
Biological replicates	Sample Name	Technical replicates	Cq (Technical replicates)	Cq	Cq Mean	ΔCq	2-ΔCq
1	Actin-root	1	26.49	26.38	26.38
		2	26.33
		3	26.32
2	Actin-root	1	26.45	26.37	26.38
		2	26.39
		3	26.27
3	Actin-root	1	26.38	26.39	26.38
		2	26.34
		3	26.45
1	Actin-stem	1	25.9	25.91	25.75
		2	25.92
		3	25.91
2	Actin-stem	1	25.45	25.54	25.75
		2	25.54
		3	25.63
3	Actin-stem	1	25.82	25.8	25.75
		2	25.85
		3	25.73
1	Actin-leaf	1	26.78	26.73	26.61
		2	26.64
		3	26.77
2	Actin-leaf	1	26.54	26.56	26.61
		2	26.67
		3	26.47
3	Actin-leaf	1	26.62	26.55	26.61
		2	26.45
		3	26.58
1	Actin-DBF	1	27.67	27.64	27.45
		2	27.62
		3	27.63
2	Actin-DBF	1	27.43	27.34	27.45
		2	27.34
		3	27.25
3	Actin-DBF	1	27.32	27.36	27.45
		2	27.46
		3	27.3
1	Actin-DF	1	27.89	27.8	27.63
		2	27.8
		3	27.71
2	Actin-DF	1	27.44	27.51	27.63
		2	27.6
		3	27.49
3	Actin-DF	1	27.54	27.59	27.63
		2	27.54
		3	27.69
1	Actin-5DAF	1	27.65	27.52	27.56
		2	27.47
		3	27.44
2	Actin-5DAF	1	27.61	27.58	27.56
		2	27.55
		3	27.58
3	Actin-5DAF	1	27.62	27.59	27.56
		2	27.61
		3	27.54
1	Actin-10DAF	1	24.8	24.73	24.84
		2	24.62
		3	24.77
2	Actin-10DAF	1	25.02	24.98	24.84
		2	25.02
		3	24.9
3	Actin-10DAF	1	24.69	24.8	24.84
		2	24.8
		3	24.91
1	Actin-20DAF	1	22.65	22.7	22.76
		2	22.64
		3	22.81
2	Actin-20DAF	1	22.87	22.79	22.76
		2	22.68
		3	22.82
3	Actin-20DAF	1	22.89	22.8	22.76
		2	22.73
		3	22.78
1	OsSC34-root	1	24.6	24.49		-1.89	3.70635
		2	24.45
		3	24.42
2	OsSC34-root	1	24.42	24.44		-1.94	3.83706
		2	24.5
		3	24.4
3	OsSC34-root	1	24.6	24.52		-1.86	3.63008
		2	24.46
		3	24.5
1	OsSC34-stem	1	23.73	23.69		-2.06	4.16986
		2	23.7
		3	23.64
2	OsSC34-stem	1	23.93	23.96		-1.79	3.45815
		2	24.03
		3	23.92
3	OsSC34-stem	1	23.96	23.89		-1.86	3.63008
		2	23.78
		3	23.93
1	OsSC34-leaf	1	23.63	23.54		-3.07333	8.41716
		2	23.46
		3	23.53
2	OsSC34-leaf	1	23.72	23.73		-2.88333	7.37853
		2	23.67
		3	23.8
3	OsSC34-leaf	1	23.02	23.05		-3.56333	11.8214
		2	23.06
		3	23.07
1	OsSC34-DBF	1	25.06	25.06		-2.38667	5.22948
		2	24.96
		3	25.16
2	OsSC34-DBF	1	24.95	24.95		-2.49667	5.6438
		2	24.89
		3	25.01
3	OsSC34-DBF	1	24.89	24.99		-2.45667	5.48947
		2	25.02
		3	25.06
1	OsSC34-F	1	25.32	25.43		-2.20333	4.60542
		2	25.46
		3	25.51
2	OsSC34-F	1	25.17	25.17		-2.46333	5.51489
		2	25.19
		3	25.15
3	OsSC34-F	1	25.46	25.34		-2.29333	4.90187
		2	25.27
		3	25.29
1	OsSC34-5DAF	1	25.25	25.34		-2.22333	4.66971
		2	25.42
		3	25.35
2	OsSC34-5DAF	1	25.48	25.5		-2.06333	4.17951
		2	25.44
		3	25.58
3	OsSC34-5DAF	1	25.29	25.38		-2.18333	4.54202
		2	25.48
		3	25.37
1	OsSC34-10DAF	1	23.05	23.04		-1.79667	3.47417
		2	23.02
		3	23.05
2	OsSC34-10DAF	1	22.92	22.81		-2.02667	4.07462
		2	22.73
		3	22.78
3	OsSC34-10DAF	1	22.79	22.79		-2.04667	4.1315
		2	22.9
		3	22.68
1	OsSC34-20DAF	1	21.3	21.34		-1.42333	2.68204
		2	21.25
		3	21.47
2	OsSC34-20DAF	1	21.18	21.25		-1.51333	2.85469
		2	21.25
		3	21.32
3	OsSC34-20DAF	1	21.42	21.45		-1.31333	2.48515
		2	21.57
		3	21.36

## Sheet: OsSC25
qRT-PCR raw data for tissue expression of OsSC25
Biological replicates	Sample Name	Technical replicates	Cq (Technical replicates)	Cq	Cq Mean	ΔCq	2-ΔCq
1	Actin-root	1	26.2	26.13	26.35
		2	26.06
		3	26.13
2	Actin-root	1	26.25	26.31	26.35
		2	26.26
		3	26.42
3	Actin-root	1	26.6	26.62	26.35
		2	26.62
		3	26.64
1	Actin-stem	1	24.13	24.23	24.15
		2	24.28
		3	24.28
2	Actin-stem	1	24.26	24.19	24.15
		2	24.12
		3	24.19
3	Actin-stem	1	23.94	24.03	24.15
		2	23.99
		3	24.16
1	Actin-leaf	1	24.08	24.07	23.91
		2	24.12
		3	24.01
2	Actin-leaf	1	23.8	23.88	23.91
		2	23.98
		3	23.86
3	Actin-leaf	1	23.92	23.79	23.91
		2	23.68
		3	23.77
1	Actin-DBF	1	26.05	26.01	25.99
		2	26.06
		3	25.92
2	Actin-DBF	1	26.18	26.12	25.99
		2	26.09
		3	26.09
3	Actin-DBF	1	25.76	25.85	25.99
		2	25.98
		3	25.81
1	Actin-DF	1	25.12	25.13	25.29
		2	25.25
		3	25.02
2	Actin-DF	1	25.52	25.54	25.29
		2	25.55
		3	25.55
3	Actin-DF	1	25.17	25.2	25.29
		2	25.1
		3	25.33
1	Actin-5DAF	1	23.46	23.5	23.85
		2	23.61
		3	23.43
2	Actin-5DAF	1	24.07	24.04	23.85
		2	24.12
		3	23.93
3	Actin-5DAF	1	24.02	24.02	23.85
		2	24.13
		3	23.91
1	Actin-10DAF	1	24.24	24.2	24.28
		2	24.19
		3	24.17
2	Actin-10DAF	1	24.15	24.2	24.28
		2	24.31
		3	24.14
3	Actin-10DAF	1	24.47	24.43	24.28
		2	24.41
		3	24.41
1	Actin-20DAF	1	25.27	25.35	25.32
		2	25.4
		3	25.38
2	Actin-20DAF	1	25.29	25.38	25.32
		2	25.45
		3	25.4
3	Actin-20DAF	1	25.15	25.23	25.32
		2	25.27
		3	25.27
1	OsSC25-root	1	30.86	30.95		4.6	0.0412346
		2	30.95
		3	31.04
2	OsSC25-root	1	31.08	31.15		4.8	0.0358968
		2	31.24
		3	31.13
3	OsSC25-root	1	31.39	31.45		5.1	0.0291573
		2	31.47
		3	31.49
1	OsSC25-stem	1	30.43	30.45		6.3	0.0126914
		2	30.55
		3	30.37
2	OsSC25-stem	1	29.59	29.53		5.38	0.0240137
		2	29.44
		3	29.56
3	OsSC25-stem	1	29.34	29.27		5.12	0.0287559
		2	29.29
		3	29.18
1	OsSC25-leaf	1	30.89	30.95		7.04	0.00759887
		2	30.97
		3	30.99
2	OsSC25-leaf	1	30.64	30.65		6.74	0.0093553
		2	30.72
		3	30.59
3	OsSC25-leaf	1	30.5	30.52		6.61	0.0102374
		2	30.58
		3	30.48
1	OsSC25-DBF	1	29.27	29.38		3.39	0.0953912
		2	29.49
		3	29.38
2	OsSC25-DBF	1	29.53	29.6		3.61	0.0818996
		2	29.73
		3	29.54
3	OsSC25-DBF	1	29.55	29.61		3.62	0.0813339
		2	29.71
		3	29.57
1	OsSC25-F	1	28.53	28.62		3.33	0.0994421
		2	28.74
		3	28.59
2	OsSC25-F	1	28.74	28.62		3.33	0.0994421
		2	28.61
		3	28.51
3	OsSC25-F	1	28.56	28.61		3.32	0.100134
		2	28.71
		3	28.56
1	OsSC25-5DAF	1	26.57	26.68		2.83	0.140632
		2	26.7
		3	26.77
2	OsSC25-5DAF	1	26.61	26.61		2.76	0.147624
		2	26.69
		3	26.53
3	OsSC25-5DAF	1	26.45	26.38		2.53	0.173139
		2	26.39
		3	26.3
1	OsSC25-10DAF	1	26.89	26.99		2.71	0.15283
		2	27.06
		3	27.02
2	OsSC25-10DAF	1	27.29	27.21		2.93	0.131215
		2	27.1
		3	27.24
3	OsSC25-10DAF	1	27.32	27.26		2.98	0.126745
		2	27.22
		3	27.24
1	OsSC25-20DAF	1	27.81	27.87		2.55	0.170755
		2	27.9
		3	27.9
2	OsSC25-20DAF	1	27.56	27.64		2.32	0.200267
		2	27.66
		3	27.7
3	OsSC25-20DAF	1	28.64	28.52		3.2	0.108819
		2	28.47
		3	28.45

## Sheet: OsSR45a
qRT-PCR raw data for tissue expression of OsSR45a
Biological replicates	Sample Name	Technical replicates	Cq (Technical replicates)	Cq	Cq Mean	ΔCq	2-ΔCq
1	Actin-root	1	24.2	24.27	24.53
		2	24.31
		3	24.3
2	Actin-root	1	24.68	24.71	24.53
		2	24.7
		3	24.75
3	Actin-root	1	24.69	24.61	24.53
		2	24.53
		3	24.61
1	Actin-stem	1	22.29	22.29	22.3
		2	22.26
		3	22.32
2	Actin-stem	1	22.23	22.26	22.3
		2	22.39
		3	22.16
3	Actin-stem	1	22.36	22.35	22.3
		2	22.32
		3	22.37
1	Actin-leaf	1	21.89	21.91	21.95
		2	21.93
		3	21.91
2	Actin-leaf	1	22.08	21.99	21.95
		2	22
		3	21.89
3	Actin-leaf	1	21.88	21.96	21.95
		2	21.93
		3	22.07
1	Actin-DBF	1	25.4	25.41	25.29
		2	25.3
		3	25.53
2	Actin-DBF	1	25.24	25.19	25.29
		2	25.23
		3	25.1
3	Actin-DBF	1	25.24	25.28	25.29
		2	25.33
		3	25.27
1	Actin-DF	1	25.24	25.33	25.2
		2	25.32
		3	25.43
2	Actin-DF	1	25.06	25.13	25.2
		2	25.23
		3	25.1
3	Actin-DF	1	25.23	25.15	25.2
		2	25.15
		3	25.07
1	Actin-5DAF	1	25.6	25.54	25.51
		2	25.53
		3	25.49
2	Actin-5DAF	1	25.54	25.53	25.51
		2	25.47
		3	25.58
3	Actin-5DAF	1	25.52	25.47	25.51
		2	25.46
		3	25.43
1	Actin-10DAF	1	23.06	23.16	22.92
		2	23.21
		3	23.21
2	Actin-10DAF	1	22.95	22.98	22.92
		2	22.91
		3	23.08
3	Actin-10DAF	1	22.63	22.62	22.92
		2	22.67
		3	22.56
1	Actin-20DAF	1	21	20.93	20.46
		2	20.92
		3	20.87
2	Actin-20DAF	1	20.04	19.98	20.46
		2	19.92
		3	19.98
3	Actin-20DAF	1	20.43	20.47	20.46
		2	20.59
		3	20.39
1	OsSR45a-root	1	23.05	23.16		-1.37	2.58471
		2	23.2
		3	23.23
2	OsSR45a-root	1	23.24	23.2		-1.33	2.51403
		2	23.19
		3	23.17
3	OsSR45a-root	1	23.26	23.29		-1.24	2.36199
		2	23.24
		3	23.37
1	OsSR45a-stem	1	22.72	22.75		0.45	0.732043
		2	22.84
		3	22.69
2	OsSR45a-stem	1	22.85	22.76		0.46	0.726986
		2	22.68
		3	22.75
3	OsSR45a-stem	1	22.69	22.78		0.48	0.716978
		2	22.83
		3	22.82
1	OsSR45a-leaf	1	22.93	22.92		0.966667	0.511687
		2	22.91
		3	22.92
2	OsSR45a-leaf	1	22.9	22.87		0.916667	0.529732
		2	22.85
		3	22.86
3	OsSR45a-leaf	1	22.84	22.84		0.886667	0.540862
		2	22.84
		3	22.84
1	OsSR45a-DBF	1	23.25	23.24		-2.05333	4.15064
		2	23.21
		3	23.26
2	OsSR45a-DBF	1	23.16	23.17		-2.12333	4.35699
		2	23.25
		3	23.1
3	OsSR45a-DBF	1	23.1	23.17		-2.12333	4.35699
		2	23.13
		3	23.28
1	OsSR45a-F	1	23.05	23.01		-2.19333	4.57361
		2	22.93
		3	23.05
2	OsSR45a-F	1	23.18	23.19		-2.01333	4.03714
		2	23.31
		3	23.08
3	OsSR45a-F	1	23.18	23.08		-2.12333	4.35699
		2	23.09
		3	22.97
1	OsSR45a-5DAF	1	23.28	23.2		-2.31333	4.9703
		2	23.14
		3	23.18
2	OsSR45a-5DAF	1	23.32	23.34		-2.17333	4.51064
		2	23.29
		3	23.41
3	OsSR45a-5DAF	1	23.15	23.19		-2.32333	5.00487
		2	23.29
		3	23.13
1	OsSR45a-10DAF	1	23.35	23.28		0.36	0.779165
		2	23.21
		3	23.28
2	OsSR45a-10DAF	1	23.2	23.23		0.31	0.806642
		2	23.28
		3	23.21
3	OsSR45a-10DAF	1	22.94	23.05		0.13	0.913831
		2	23.08
		3	23.13
1	OsSR45a-20DAF	1	22.81	22.85		2.39	0.190782
		2	22.9
		3	22.84
2	OsSR45a-20DAF	1	22.83	22.85		2.39	0.190782
		2	22.83
		3	22.89
3	OsSR45a-20DAF	1	22.81	22.74		2.28	0.205898
		2	22.74
		3	22.67

[truncated: 14 more sheets: OsSR45, OsRS2Z39, OsRS2Z37, OsRS2Z36, OsRS2Z38, OsRSZ21a, OsRSZ21, OsRSZ23, OsRS29, OsRS33, OsSR33, OsSR32, OsSR33a, OsSR40]
