# Supplementary material for: Comprehensive study of serine/arginine-rich (SR) gene family in rice: characterization, evolution and expression analysis
Source: PeerJ journal article supplement (doi:10.7717/peerj.16193), 2023-10-13
Supplement: qRTPCR_raw_dataTableS9S16.zip [file Supplemental Table_S10.xlsx]

## Sheet: OsSCL30a
qRT-PCR raw data for CK treatment of OsSCL30a
Biological replicates	Sample Name	Technical replicates	Cq	Cq Mean (Technical replicates)	Cq Mean (Biological replicates)	ΔCq	2-ΔCq
1	CK1-Actin-1h	1	25	25.01
		2	25.04
		3	24.99
2	CK2-Actin-1h	1	24.68	24.71
		2	24.7
		3	24.74
3	CK3-Actin-1h	1	24.88	24.97
		2	25
		3	25.03
1	CK1-Actin-2h	1	25.11	25.11
		2	25.08
		3	25.14
2	CK2-Actin-2h	1	24.98	24.99
		2	24.98
		3	25.01
3	CK3-Actin-2h	1	25.06	25.08
		2	25.11
		3	25.07
1	CK1-Actin-4h	1	25.1	25.14
		2	25.15
		3	25.17
2	CK2-Actin-4h	1	25	25.01
		2	25.09
		3	24.93
3	CK3-Actin-4h	1	24.44	24.5
		2	24.51
		3	24.55
1	CK1-Actin-6h	1	25.99	25.98
		2	25.99
		3	25.97
2	CK2-Actin-6h	1	26.76	26.72
		2	26.7
		3	26.7
3	CK3-Actin-6h	1	26.01	25.98
		2	25.97
		3	25.96
1	CK1-Actin-9h	1	26.88	26.86
		2	26.89
		3	26.81
2	CK2-Actin-9h	1	26.87	26.87
		2	26.84
		3	26.9
3	CK3-Actin-9h	1	27.01	26.99
		2	26.96
		3	26.98
1	CK1-Actin-12h	1	27	27.03
		2	27.02
		3	27.07
2	CK2-Actin-12h	1	26.21	26.18
		2	26.17
		3	26.16
3	CK3-Actin-12h	1	26.66	26.64
		2	26.64
		3	26.62
1	CK1-Actin-24h	1	25.8	25.81
		2	25.8
		3	25.83
2	CK2-Actin-24h	1	25.9	25.83
		2	25.77
		3	25.82
3	CK3-Actin-24h	1	25.73	25.75
		2	25.77
		3	25.75
1	CK1-Actin-48h	1	25.6	25.54
		2	25.5
		3	25.52
2	CK2-Actin-48h	1	25.33	25.32
		2	25.34
		3	25.29
3	CK3-Actin-48h	1	25.22	25.23
		2	25.23
		3	25.24
1	CK1-OsSCL30a-1h	1	28.55	28.58	3.68333	0.0778406
		2	28.6
		3	28.59
2	CK2-OsSCL30a-1h	1	28.63	28.6	3.70333	0.0767689
		2	28.59
		3	28.58
3	CK3-OsSCL30a-1h	1	28.58	28.58	3.68333	0.0778406
		2	28.59
		3	28.57
1	CK1-OsSCL30a-2h	1	28.33	28.3	3.24	0.105843
		2	28.27
		3	28.3
2	CK2-OsSCL30a-2h	1	28.33	28.35	3.29	0.102238
		2	28.33
		3	28.39
3	CK3-OsSCL30a-2h	1	28.01	28.06	3	0.125
		2	28.08
		3	28.09
1	CK1-OsSCL30a-4h	1	28.66	28.67	3.78667	0.0724602
		2	28.7
		3	28.65
2	CK2-OsSCL30a-4h	1	28.4	28.37	3.48667	0.089209
		2	28.36
		3	28.35
3	CK3-OsSCL30a-4h	1	28.56	28.56	3.67667	0.0782011
		2	28.58
		3	28.54
1	CK1-OsSCL30a-6h	1	29.1	29.14	2.91333	0.132739
		2	29.15
		3	29.17
2	CK2-OsSCL30a-6h	1	29.28	29.29	3.06333	0.119631
		2	29.31
		3	29.28
3	CK3-OsSCL30a-6h	1	29.2	29.23	3.00333	0.124712
		2	29.24
		3	29.25
1	CK1-OsSCL30a-9h	1	29.09	29.07	2.16333	0.22324
		2	29
		3	29.12
2	CK2-OsSCL30a-9h	1	29.09	29.05	2.14333	0.226356
		2	29.02
		3	29.04
3	CK3-OsSCL30a-9h	1	29.11	29.16	2.25333	0.209739
		2	29.17
		3	29.2
1	CK1-OsSCL30a-12h	1	28.9	28.9	2.28333	0.205423
		2	28.9
		3	28.9
2	CK2-OsSCL30a-12h	1	28.99	28.97	2.35333	0.195693
		2	28.9
		3	29.02
3	CK3-OsSCL30a-12h	1	28.9	28.91	2.29333	0.204004
		2	28.94
		3	28.89
1	CK1-OsSCL30a-24h	1	29.74	29.75	3.95333	0.0645547
		2	29.7
		3	29.81
2	CK2-OsSCL30a-24h	1	29.32	29.3	3.50333	0.0881844
		2	29.29
		3	29.29
3	CK3-OsSCL30a-24h	1	29.21	29.22	3.42333	0.0932125
		2	29.24
		3	29.21
1	CK1-OsSCL30a-48h	1	28.18	28.19	2.82667	0.140958
		2	28.17
		3	28.22
2	CK2-OsSCL30a-48h	1	28.29	28.31	2.94667	0.129707
		2	28.29
		3	28.35
3	CK3-OsSCL30a-48h	1	28.41	28.38	3.01667	0.123564
		2	28.4
		3	28.33

## Sheet: OsSCL30
qRT-PCR raw data for CK treatment of OsSCL30
Biological replicates	Sample Name	Technical replicates	Cq	Cq Mean (Technical replicates)	Cq Mean (Biological replicates)	ΔCq	2-ΔCq
1	CK1-Actin-1h	1	25.22	25.19
		2	25.2
		3	25.15
2	CK2-Actin-1h	1	25.15	25.12
		2	25.11
		3	25.1
3	CK3-Actin-1h	1	25.03	25.05
		2	25.05
		3	25.07
1	CK1-Actin-2h	1	25.07	25.06
		2	25.07
		3	25.04
2	CK2-Actin-2h	1	25.02	25.09
		2	25.15
		3	25.1
3	CK3-Actin-2h	1	25.04	25.04
		2	25.04
		3	25.04
1	CK1-Actin-4h	1	25.4	25.42
		2	25.49
		3	25.37
2	CK2-Actin-4h	1	25.73	25.72
		2	25.69
		3	25.74
3	CK3-Actin-4h	1	25.41	25.4
		2	25.45
		3	25.34
1	CK1-Actin-6h	1	25.23	25.25
		2	25.26
		3	25.26
2	CK2-Actin-6h	1	25.4	25.39
		2	25.37
		3	25.4
3	CK3-Actin-6h	1	25.38	25.37
		2	25.39
		3	25.34
1	CK1-Actin-9h	1	25.85	25.83
		2	25.85
		3	25.79
2	CK2-Actin-9h	1	25.79	25.82
		2	25.8
		3	25.87
3	CK3-Actin-9h	1	25.63	25.62
		2	25.59
		3	25.64
1	CK1-Actin-12h	1	26.83	26.8
		2	26.81
		3	26.77
2	CK2-Actin-12h	1	26.35	26.26
		2	26.23
		3	26.2
3	CK3-Actin-12h	1	26.39	26.39
		2	26.42
		3	26.36
1	CK1-Actin-24h	1	23.84	23.83
		2	23.84
		3	23.81
2	CK2-Actin-24h	1	24.12	24.1
		2	24.07
		3	24.11
3	CK3-Actin-24h	1	24.17	24.13
		2	24.12
		3	24.1
1	CK1-Actin-48h	1	22.12	22.11
		2	22.03
		3	22.19
2	CK2-Actin-48h	1	22.14	22.08
		2	22.07
		3	22.03
3	CK3-Actin-48h	1	22.26	22.27
		2	22.26
		3	22.28
1	CK1-OsSCL30-1h	1	29.93	29.97	4.85	0.034674
		2	29.99
		3	29.99
2	CK2-OsSCL30-1h	1	29.94	29.97	4.85	0.034674
		2	29.98
		3	29.99
3	CK3-OsSCL30-1h	1	30.19	30.21	5.09	0.0293601
		2	30.18
		3	30.26
1	CK1-OsSCL30-2h	1	29.66	29.66	4.6	0.0412346
		2	29.69
		3	29.63
2	CK2-OsSCL30-2h	1	30.2	30.22	5.16	0.0279695
		2	30.25
		3	30.23
3	CK3-OsSCL30-2h	1	29.29	29.26	4.2	0.0544094
		2	29.24
		3	29.25
1	CK1-OsSCL30-4h	1	28.84	28.87	3.36	0.0973956
		2	28.88
		3	28.89
2	CK2-OsSCL30-4h	1	28.83	28.83	3.32	0.100134
		2	28.82
		3	28.84
3	CK3-OsSCL30-4h	1	28.96	28.99	3.48	0.0896222
		2	29.02
		3	28.99
1	CK1-OsSCL30-6h	1	29.51	29.49	4.15	0.0563282
		2	29.51
		3	29.45
2	CK2-OsSCL30-6h	1	29.67	29.62	4.28	0.0514744
		2	29.6
		3	29.59
3	CK3-OsSCL30-6h	1	29.47	29.46	4.12	0.0575117
		2	29.43
		3	29.48
1	CK1-OsSCL30-9h	1	29.41	29.44	3.68	0.0780207
		2	29.45
		3	29.46
2	CK2-OsSCL30-9h	1	29.02	29.02	3.26	0.104386
		2	29
		3	29.04
3	CK3-OsSCL30-9h	1	28.97	28.93	3.17	0.111105
		2	28.92
		3	28.9
1	CK1-OsSCL30-12h	1	29.41	29.44	3.68	0.0780207
		2	29.45
		3	29.46
2	CK2-OsSCL30-12h	1	29.02	29.02	3.26	0.104386
		2	29
		3	29.04
3	CK3-OsSCL30-12h	1	28.97	28.93	3.17	0.111105
		2	28.92
		3	28.9
1	CK1-OsSCL30-24h	1	29.62	29.66	5.64	0.0200535
		2	29.69
		3	29.67
2	CK2-OsSCL30-24h	1	29.52	29.47	5.45	0.0228763
		2	29.46
		3	29.43
3	CK3-OsSCL30-24h	1	29.52	29.51	5.49	0.0222508
		2	29.52
		3	29.49
1	CK1-OsSCL30-48h	1	27.4	27.47	5.32	0.0250334
		2	27.53
		3	27.48
2	CK2-OsSCL30-48h	1	27.7	27.68	5.53	0.0216423
		2	27.66
		3	27.68
3	CK3-OsSCL30-48h	1	27.47	27.53	5.38	0.0240137
		2	27.57
		3	27.55

## Sheet: OsSCL57
qRT-PCR raw data for CK treatment of OsSCL57
Biological replicates	Sample Name	Technical replicates	Cq	Cq Mean (Technical replicates)	Cq Mean (Biological replicates)	ΔCq	2-ΔCq
1	CK1-Actin-1h	1	26.4	26.42	26.37
		2	26.49
		3	26.37
2	CK2-Actin-1h	1	26.46	26.43	26.37
		2	26.42
		3	26.41
3	CK3-Actin-1h	1	26.25	26.27	26.37
		2	26.27
		3	26.29
1	CK1-Actin-2h	1	26.48	26.47	26.42
		2	26.49
		3	26.44
2	CK2-Actin-2h	1	26.29	26.36	26.42
		2	26.42
		3	26.37
3	CK3-Actin-2h	1	26.53	26.43	26.42
		2	26.35
		3	26.41
1	CK1-Actin-4h	1	25.27	25.29	25.97
		2	25.36
		3	25.24
2	CK2-Actin-4h	1	26.26	26.25	25.97
		2	26.22
		3	26.27
3	CK3-Actin-4h	1	26.37	26.36	25.97
		2	26.41
		3	26.3
1	CK1-Actin-6h	1	25.51	25.53	24.23
		2	25.54
		3	25.54
2	CK2-Actin-6h	1	23.2	23.19	24.23
		2	23.17
		3	23.2
3	CK3-Actin-6h	1	23.97	23.96	24.23
		2	23.98
		3	23.93
1	CK1-Actin-9h	1	26.57	26.55	26.51
		2	26.57
		3	26.51
2	CK2-Actin-9h	1	26.54	26.57	26.51
		2	26.55
		3	26.62
3	CK3-Actin-9h	1	26.43	26.42	26.51
		2	26.39
		3	26.44
1	CK1-Actin-12h	1	26.36	26.33	26.36
		2	26.34
		3	26.3
2	CK2-Actin-12h	1	26.43	26.34	26.36
		2	26.31
		3	26.28
3	CK3-Actin-12h	1	26.42	26.42	26.36
		2	26.45
		3	26.39
1	CK1-Actin-24h	1	25.8	25.79	25.57
		2	25.8
		3	25.77
2	CK2-Actin-24h	1	25.45	25.43	25.57
		2	25.4
		3	25.44
3	CK3-Actin-24h	1	25.54	25.5	25.57
		2	25.49
		3	25.47
1	CK1-Actin-48h	1	25.55	25.54	25.36
		2	25.46
		3	25.62
2	CK2-Actin-48h	1	25.38	25.32	25.36
		2	25.31
		3	25.27
3	CK3-Actin-48h	1	25.22	25.23	25.36
		2	25.22
		3	25.24
1	CK1-OsSCL57-1h	1	28.56	28.6	28.76	2.23	0.213159
		2	28.62
		3	28.62
2	CK2-OsSCL57-1h	1	28.89	28.92	28.76	2.55	0.170755
		2	28.93
		3	28.94
3	CK3-OsSCL57-1h	1	28.74	28.76	28.76	2.39	0.190782
		2	28.73
		3	28.81
1	CK1-OsSCL57-2h	1	28.04	28.04	28.11	1.62	0.325335
		2	28.07
		3	28.01
2	CK2-OsSCL57-2h	1	28.06	28.08	28.11	1.66	0.316439
		2	28.11
		3	28.09
3	CK3-OsSCL57-2h	1	28.24	28.21	28.11	1.79	0.289172
		2	28.19
		3	28.2
1	CK1-OsSCL57-4h	1	28.24	28.21	28.17	2.2	0.217638
		2	28.17
		3	28.22
2	CK2-OsSCL57-4h	1	28	28	28.17	2.2	0.217638
		2	27.99
		3	28.01
3	CK3-OsSCL57-4h	1	28.28	28.31	28.17	2.2	0.217638
		2	28.34
		3	28.31
1	CK1-OsSCL57-6h	1	27.41	27.39	27.31	3.16	0.111878
		2	27.41
		3	27.35
2	CK2-OsSCL57-6h	1	27.31	27.26	27.31	3.03	0.122428
		2	27.24
		3	27.23
3	CK3-OsSCL57-6h	1	27.3	27.29	27.31	3.06	0.119908
		2	27.26
		3	27.31
1	CK1-OsSCL57-9h	1	27.1	27.13	27.28	0.62	0.650671
		2	27.14
		3	27.15
2	CK2-OsSCL57-9h	1	27.31	27.31	27.28	0.8	0.574349
		2	27.29
		3	27.33
3	CK3-OsSCL57-9h	1	27.43	27.39	27.28	0.88	0.543367
		2	27.38
		3	27.36
1	CK1-OsSCL57-12h	1	27.49	27.48	27.42	1.12	0.460094
		2	27.46
		3	27.49
2	CK2-OsSCL57-12h	1	27.43	27.4	27.42	1.04	0.486327
		2	27.39
		3	27.38
3	CK3-OsSCL57-12h	1	27.36	27.38	27.42	1.02	0.493116
		2	27.45
		3	27.33
1	CK1-OsSCL57-24h	1	28.13	28.17	28.38	2.6	0.164938
		2	28.2
		3	28.18
2	CK2-OsSCL57-24h	1	28.52	28.47	28.38	2.9	0.133972
		2	28.46
		3	28.43
3	CK3-OsSCL57-24h	1	28.5	28.49	28.38	2.92	0.132127
		2	28.5
		3	28.47
1	CK1-OsSCL57-48h	1	28.48	28.55	28.63	3.19	0.109576
		2	28.61
		3	28.56
2	CK2-OsSCL57-48h	1	28.73	28.71	28.63	3.35	0.098073
		2	28.69
		3	28.71
3	CK3-OsSCL57-48h	1	28.55	28.64	28.63	3.28	0.102949
		2	28.68
		3	28.69

## Sheet: OsSCL28
qRT-PCR raw data for CK treatment of OsSCL28
Biological replicates	Sample Name	Technical replicates	Cq	Cq Mean (Technical replicates)	Cq Mean (Biological replicates)	ΔCq	2-ΔCq
1	CK1-Actin-1h	1	25.15		25.19	25.12
		2	25.17
		3	25.25
2	CK2-Actin-1h	1	25.09		25.12	25.12
		2	25.14
		3	25.13
3	CK3-Actin-1h	1	25.03		25.05	25.12
		2	25.04
		3	25.08
1	CK1-Actin-2h	1	25.09		25.06	25.06
		2	25.05
		3	25.04
2	CK2-Actin-2h	1	25.02		25.09	25.06
		2	25.12
		3	25.13
3	CK3-Actin-2h	1	25.03		25.04	25.06
		2	25
		3	25.09
1	CK1-Actin-4h	1	25.4		25.42	25.51
		2	25.49
		3	25.37
2	CK2-Actin-4h	1	25.75		25.72	25.51
		2	25.69
		3	25.72
3	CK3-Actin-4h	1	25.41		25.4	25.51
		2	25.45
		3	25.34
1	CK1-Actin-6h	1	25.26		25.25	25.34
		2	25.23
		3	25.26
2	CK2-Actin-6h	1	25.4		25.39	25.34
		2	25.37
		3	25.4
3	CK3-Actin-6h	1	25.38		25.37	25.34
		2	25.39
		3	25.34
1	CK1-Actin-9h	1	25.85		25.83	25.76
		2	25.85
		3	25.79
2	CK2-Actin-9h	1	25.79		25.82	25.76
		2	25.8
		3	25.87
3	CK3-Actin-9h	1	25.63		25.62	25.76
		2	25.59
		3	25.64
1	CK1-Actin-12h	1	26.83		26.8	26.48
		2	26.81
		3	26.77
2	CK2-Actin-12h	1	26.35		26.26	26.48
		2	26.23
		3	26.2
3	CK3-Actin-12h	1	26.39		26.39	26.48
		2	26.42
		3	26.36
1	CK1-Actin-24h	1	23.84		23.83	24.02
		2	23.84
		3	23.81
2	CK2-Actin-24h	1	24.12		24.1	24.02
		2	24.07
		3	24.11
3	CK3-Actin-24h	1	24.17		24.13	24.02
		2	24.12
		3	24.1
1	CK1-Actin-48h	1	22.12		22.11	22.15
		2	22.03
		3	22.19
2	CK2-Actin-48h	1	22.14		22.08	22.15
		2	22.07
		3	22.03
3	CK3-Actin-48h	1	22.26		22.27	22.15
		2	22.26
		3	22.28
1	CK1-OsSCL28-1h	1	27.79		27.83		2.71	0.15283
		2	27.85
		3	27.85
2	CK2-OsSCL28-1h	1	27.82		27.85		2.73	0.150726
		2	27.86
		3	27.87
3	CK3-OsSCL28-1h	1	27.84		27.86		2.74	0.149685
		2	27.83
		3	27.91
1	CK1-OsSCL28-2h	1	27.11		27.11		2.05	0.241484
		2	27.14
		3	27.08
2	CK2-OsSCL28-2h	1	26.85		26.87		1.81	0.285191
		2	26.9
		3	26.88
3	CK3-OsSCL28-2h	1	26.94		26.91		1.85	0.277392
		2	26.89
		3	26.9
1	CK1-OsSCL28-4h	1	26.83		26.86		1.35	0.392292
		2	26.87
		3	26.88
2	CK2-OsSCL28-4h	1	26.9		26.9		1.39	0.381565
		2	26.89
		3	26.91
3	CK3-OsSCL28-4h	1	26.78		26.81		1.3	0.406126
		2	26.84
		3	26.81
1	CK1-OsSCL28-6h	1	26.19		26.17		0.83	0.562529
		2	26.19
		3	26.13
2	CK2-OsSCL28-6h	1	26.17		26.12		0.78	0.582367
		2	26.1
		3	26.09
3	CK3-OsSCL28-6h	1	26.07		26.06		0.72	0.607097
		2	26.03
		3	26.08
1	CK1-OsSCL28-9h	1	26.33		26.36		0.6	0.659754
		2	26.37
		3	26.38
2	CK2-OsSCL28-9h	1	26.38		26.38		0.62	0.650671
		2	26.36
		3	26.4
3	CK3-OsSCL28-9h	1	26.45		26.41		0.65	0.63728
		2	26.4
		3	26.38
1	CK1-OsSCL28-12h	1	27.01		27		0.52	0.697372
		2	26.98
		3	27.01
2	CK2-OsSCL28-12h	1	26.76		26.73		0.25	0.840896
		2	26.72
		3	26.71
3	CK3-OsSCL28-12h	1	26.45		26.41		0.65	0.63728
		2	26.4
		3	26.38
1	CK1-OsSCL28-24h	1	25.69		25.73		1.71	0.30566
		2	25.76
		3	25.74
2	CK2-OsSCL28-24h	1	25.79		25.74		1.72	0.303549
		2	25.73
		3	25.7
3	CK3-OsSCL28-24h	1	25.62		25.61		1.59	0.332171
		2	25.62
		3	25.59
1	CK1-OsSCL28-48h	1	23.92		23.84		1.69	0.309927
		2	23.78
		3	23.86
2	CK2-OsSCL28-48h	1	23.04		23.08		0.93	0.524858
		2	23.04
		3	23.16
3	CK3-OsSCL28-48h	1	23.96		23.86		1.71	0.30566
		2	23.81
		3	23.81

## Sheet: OsSCL25
qRT-PCR raw data for CK treatment of OsSCL25
Biological replicates	Sample Name	Technical replicates	Cq	Cq Mean (Technical replicates)	Cq Mean (Biological replicates)	ΔCq	2-ΔCq
1	CK1-Actin-1h	1	25.2	25.19	25.12
		2	25.2
		3	25.17
2	CK2-Actin-1h	1	25.14	25.12	25.12
		2	25.05
		3	25.17
3	CK3-Actin-1h	1	25.06	25.05	25.12
		2	25.02
		3	25.07
1	CK1-Actin-2h	1	25.07	25.06	25.06
		2	25.11
		3	25
2	CK2-Actin-2h	1	25.07	25.09	25.06
		2	25.1
		3	25.1
3	CK3-Actin-2h	1	25.08	25.04	25.06
		2	25.06
		3	24.98
1	CK1-Actin-4h	1	25.39	25.42	25.51
		2	25.43
		3	25.44
2	CK2-Actin-4h	1	25.7	25.72	25.51
		2	25.72
		3	25.74
3	CK3-Actin-4h	1	25.41	25.4	25.51
		2	25.41
		3	25.38
1	CK1-Actin-6h	1	25.18	25.25	25.34
		2	25.31
		3	25.26
2	CK2-Actin-6h	1	25.39	25.39	25.34
		2	25.42
		3	25.36
3	CK3-Actin-6h	1	25.38	25.37	25.34
		2	25.38
		3	25.35
1	CK1-Actin-9h	1	25.85	25.83	25.76
		2	25.8
		3	25.84
2	CK2-Actin-9h	1	25.86	25.82	25.76
		2	25.81
		3	25.79
3	CK3-Actin-9h	1	25.63	25.62	25.76
		2	25.54
		3	25.7
1	CK1-Actin-12h	1	26.86	26.8	26.48
		2	26.79
		3	26.75
2	CK2-Actin-12h	1	26.2	26.26	26.48
		2	26.3
		3	26.28
3	CK3-Actin-12h	1	26.4	26.39	26.48
		2	26.37
		3	26.4
1	CK1-Actin-24h	1	23.84	23.83	24.02
		2	23.85
		3	23.8
2	CK2-Actin-24h	1	24.12	24.1	24.02
		2	24.12
		3	24.06
3	CK3-Actin-24h	1	24.1	24.13	24.02
		2	24.11
		3	24.18
1	CK1-Actin-48h	1	22.12	22.11	22.15
		2	22.08
		3	22.13
2	CK2-Actin-48h	1	22.11	22.08	22.15
		2	22.09
		3	22.05
3	CK3-Actin-48h	1	22.36	22.27	22.15
		2	22.24
		3	22.21
1	CK1-OsSCL25-1h	1	25.83	25.82		0.7	0.615572
		2	25.8
		3	25.83
2	CK2-OsSCL25-1h	1	26.04	26.01		0.89	0.539614
		2	26
		3	25.99
3	CK3-OsSCL25-1h	1	25.68	25.7		0.58	0.668964
		2	25.77
		3	25.65
1	CK1-OsSCL25-2h	1	25.7	25.74		0.68	0.624165
		2	25.77
		3	25.75
2	CK2-OsSCL25-2h	1	25.71	25.66		0.6	0.659754
		2	25.65
		3	25.62
3	CK3-OsSCL25-2h	1	25.87	25.86		0.8	0.574349
		2	25.87
		3	25.84
1	CK1-OsSCL25-4h	1	26.52	26.59		1.08	0.473029
		2	26.65
		3	26.6
2	CK2-OsSCL25-4h	1	26.23	26.21		0.7	0.615572
		2	26.19
		3	26.21
3	CK3-OsSCL25-4h	1	26.41	26.38		0.87	0.547147
		2	26.36
		3	26.37
1	CK1-OsSCL25-6h	1	26.36	26.39		1.05	0.482968
		2	26.4
		3	26.41
2	CK2-OsSCL25-6h	1	26.62	26.62		1.28	0.411796
		2	26.61
		3	26.63
3	CK3-OsSCL25-6h	1	26.55	26.58		1.24	0.423373
		2	26.61
		3	26.58
1	CK1-OsSCL25-9h	1	26.41	26.39		0.63	0.646176
		2	26.41
		3	26.35
2	CK2-OsSCL25-9h	1	26.45	26.4		0.64	0.641713
		2	26.38
		3	26.37
3	CK3-OsSCL25-9h	1	26.27	26.26		0.5	0.707107
		2	26.23
		3	26.28
1	CK1-OsSCL25-12h	1	26.41	26.39		0.63	0.646176
		2	26.41
		3	26.35
2	CK2-OsSCL25-12h	1	26.45	26.4		0.64	0.641713
		2	26.38
		3	26.37
3	CK3-OsSCL25-12h	1	26.79	26.82		0.34	0.790041
		2	26.83
		3	26.84
1	CK1-OsSCL25-24h	1	25.35	25.37		1.35	0.392292
		2	25.34
		3	25.42
2	CK2-OsSCL25-24h	1	25.26	25.26		1.24	0.423373
		2	25.29
		3	25.23
3	CK3-OsSCL25-24h	1	25.29	25.31		1.29	0.408951
		2	25.34
		3	25.32
1	CK1-OsSCL25-48h	1	23.1	23.07		0.92	0.528509
		2	23.05
		3	23.06
2	CK2-OsSCL25-48h	1	23.22	23.17		1.02	0.493116
		2	23.16
		3	23.13
3	CK3-OsSCL25-48h	1	23.59	23.58		1.43	0.371131
		2	23.59
		3	23.56

## Sheet: OsSCL26
qRT-PCR raw data for CK treatment of OsSCL26
Biological replicates	Sample Name	Technical replicates	Cq	Cq Mean (Technical replicates)	Cq Mean (Biological replicates)	ΔCq	2-ΔCq
1	CK1-Actin-1h	1	25.17	25.19	25.12
		2	25.24
		3	25.16
2	CK2-Actin-1h	1	25.16	25.12	25.12
		2	25.1
		3	25.14
3	CK3-Actin-1h	1	25.15	25.05	25.12
		2	24.97
		3	25.03
1	CK1-Actin-2h	1	24.97	25.06	25.06
		2	25.12
		3	25.09
2	CK2-Actin-2h	1	25.11	25.09	25.06
		2	25.12
		3	25.04
3	CK3-Actin-2h	1	25.17	25.04	25.06
		2	24.96
		3	24.99
1	CK1-Actin-4h	1	25.43	25.42	25.51
		2	25.5
		3	25.33
2	CK2-Actin-4h	1	25.76	25.72	25.51
		2	25.64
		3	25.76
3	CK3-Actin-4h	1	25.48	25.4	25.51
		2	25.35
		3	25.37
1	CK1-Actin-6h	1	25.24	25.25	25.34
		2	25.2
		3	25.31
2	CK2-Actin-6h	1	25.36	25.39	25.34
		2	25.32
		3	25.49
3	CK3-Actin-6h	1	25.44	25.37	25.34
		2	25.31
		3	25.36
1	CK1-Actin-9h	1	25.79	25.83	25.76
		2	25.93
		3	25.77
2	CK2-Actin-9h	1	25.92	25.82	25.76
		2	25.79
		3	25.75
3	CK3-Actin-9h	1	25.52	25.62	25.76
		2	25.68
		3	25.66
1	CK1-Actin-12h	1	26.85	26.8	26.48
		2	26.84
		3	26.71
2	CK2-Actin-12h	1	26.15	26.26	26.48
		2	26.37
		3	26.26
3	CK3-Actin-12h	1	26.4	26.39	26.48
		2	26.32
		3	26.45
1	CK1-Actin-24h	1	23.78	23.83	24.02
		2	23.9
		3	23.81
2	CK2-Actin-24h	1	24.05	24.1	24.02
		2	24.08
		3	24.17
3	CK3-Actin-24h	1	24.12	24.13	24.02
		2	24.09
		3	24.18
1	CK1-Actin-48h	1	22.14	22.11	22.15
		2	22.17
		3	22.02
2	CK2-Actin-48h	1	22.14	22.08	22.15
		2	22.03
		3	22.07
3	CK3-Actin-48h	1	22.36	22.27	22.15
		2	22.24
		3	22.21
1	CK1-OsSCL26-1h	1	26.62	26.59		1.47	0.360982
		2	26.51
		3	26.64
2	CK2-OsSCL26-1h	1	26.59	26.67		1.55	0.34151
		2	26.66
		3	26.76
3	CK3-OsSCL26-1h	1	26.9	26.87		1.75	0.297302
		2	26.78
		3	26.93
1	CK1-OsSCL26-2h	1	26.6	26.55		1.49	0.356013
		2	26.53
		3	26.52
2	CK2-OsSCL26-2h	1	26.35	26.42		1.36	0.389582
		2	26.48
		3	26.43
3	CK3-OsSCL26-2h	1	26.57	26.46		1.4	0.378929
		2	26.39
		3	26.42
1	CK1-OsSCL26-4h	1	27.01	27		1.49	0.356013
		2	27.06
		3	26.93
2	CK2-OsSCL26-4h	1	27.03	26.96		1.45	0.366021
		2	27
		3	26.85
3	CK3-OsSCL26-4h	1	26.98	26.96		1.45	0.366021
		2	26.86
		3	27.04
1	CK1-OsSCL26-6h	1	27.13	27.06		1.72	0.303549
		2	26.95
		3	27.1
2	CK2-OsSCL26-6h	1	27.05	27.16		1.82	0.283221
		2	27.21
		3	27.22
3	CK3-OsSCL26-6h	1	27.34	27.3		1.96	0.257028
		2	27.24
		3	27.32
1	CK1-OsSCL26-9h	1	26.38	26.43		0.67	0.628507
		2	26.49
		3	26.42
2	CK2-OsSCL26-9h	1	26.72	26.74		0.98	0.50698
		2	26.64
		3	26.86
3	CK3-OsSCL26-9h	1	26.67	26.78		1.02	0.493116
		2	26.81
		3	26.86
1	CK1-OsSCL26-12h	1	27.88	27.89		1.41	0.376312
		2	27.94
		3	27.85
2	CK2-OsSCL26-12h	1	27.17	27.23		0.75	0.594604
		2	27.19
		3	27.33
3	CK3-OsSCL26-12h	1	27.47	27.43		0.95	0.517632
		2	27.39
		3	27.43
1	CK1-OsSCL26-24h	1	25.7	25.75		1.73	0.301452
		2	25.86
		3	25.69
2	CK2-OsSCL26-24h	1	25.9	25.88		1.86	0.275476
		2	25.8
		3	25.89
3	CK3-OsSCL26-24h	1	25.22	25.16		1.14	0.45376
		2	25.18
		3	25.12
1	CK1-OsSCL26-48h	1	23.57	23.55		1.4	0.378929
		2	23.57
		3	23.51
2	CK2-OsSCL26-48h	1	23.52	23.57		1.42	0.373712
		2	23.56
		3	23.63
3	CK3-OsSCL26-48h	1	23.54	23.58		1.43	0.371131
		2	23.71
		3	23.49

## Sheet: OsSC32
qRT-PCR raw data for CK treatment of OsSC32
Biological replicates	Sample Name	Technical replicates	Cq	Cq Mean (Technical replicates)	Cq Mean (Biological replicates)	ΔCq	2-ΔCq
1	CK1-Actin-1h	1	25.15	25.19	25.12
		2	25.25
		3	25.17
2	CK2-Actin-1h	1	24.99	25.12	25.12
		2	25.17
		3	25.2
3	CK3-Actin-1h	1	25.18	25.05	25.12
		2	25
		3	24.97
1	CK1-Actin-2h	1	25.11	25.06	25.06
		2	25.05
		3	25.02
2	CK2-Actin-2h	1	25.12	25.09	25.06
		2	25.01
		3	25.14
3	CK3-Actin-2h	1	24.96	25.04	25.06
		2	24.99
		3	25.17
1	CK1-Actin-4h	1	25.31	25.42	25.51
		2	25.4
		3	25.55
2	CK2-Actin-4h	1	25.72	25.72	25.51
		2	25.66
		3	25.78
3	CK3-Actin-4h	1	25.33	25.4	25.51
		2	25.51
		3	25.36
1	CK1-Actin-6h	1	25.24	25.25	25.34
		2	25.16
		3	25.35
2	CK2-Actin-6h	1	25.44	25.39	25.34
		2	25.29
		3	25.44
3	CK3-Actin-6h	1	25.42	25.37	25.34
		2	25.41
		3	25.28
1	CK1-Actin-9h	1	25.78	25.83	25.76
		2	25.91
		3	25.8
2	CK2-Actin-9h	1	25.81	25.82	25.76
		2	25.84
		3	25.81
3	CK3-Actin-9h	1	25.53	25.62	25.76
		2	25.73
		3	25.6
1	CK1-Actin-12h	1	26.8	26.8	26.48
		2	26.7
		3	26.9
2	CK2-Actin-12h	1	26.23	26.26	26.48
		2	26.29
		3	26.26
3	CK3-Actin-12h	1	26.43	26.39	26.48
		2	26.35
		3	26.39
1	CK1-Actin-24h	1	23.83	23.83	24.02
		2	23.78
		3	23.88
2	CK2-Actin-24h	1	24.03	24.1	24.02
		2	24.08
		3	24.19
3	CK3-Actin-24h	1	24.18	24.13	24.02
		2	24.09
		3	24.12
1	CK1-Actin-48h	1	22.16	22.11	22.15
		2	22.08
		3	22.09
2	CK2-Actin-48h	1	22	22.08	22.15
		2	22.09
		3	22.15
3	CK3-Actin-48h	1	22.28	22.27	22.15
		2	22.18
		3	22.35
1	CK1-OsSC32-1h	1	25.6	25.53	25.63	0.41	0.752623
		2	25.55
		3	25.44
2	CK2-OsSC32-1h	1	25.73	25.76	25.63	0.64	0.641713
		2	25.79
		3	25.76
3	CK3-OsSC32-1h	1	25.5	25.59	25.63	0.47	0.721965
		2	25.58
		3	25.69
1	CK1-OsSC32-2h	1	25.03	25.09	25.25	0.03	0.97942
		2	25.17
		3	25.07
2	CK2-OsSC32-2h	1	25.36	25.34	25.25	0.28	0.823591
		2	25.29
		3	25.37
3	CK3-OsSC32-2h	1	25.29	25.32	25.25	0.26	0.835088
		2	25.34
		3	25.33
1	CK1-OsSC32-4h	1	24.51	24.59	24.68	-0.92	1.89212
		2	24.7
		3	24.56
2	CK2-OsSC32-4h	1	24.63	24.66	24.68	-0.85	1.8025
		2	24.73
		3	24.62
3	CK3-OsSC32-4h	1	24.76	24.78	24.68	-0.73	1.65864
		2	24.8
		3	24.78
1	CK1-OsSC32-6h	1	24.84	24.91	24.99	-0.43	1.34723
		2	24.86
		3	25.03
2	CK2-OsSC32-6h	1	24.67	24.76	24.99	-0.58	1.49485
		2	24.85
		3	24.76
3	CK3-OsSC32-6h	1	25.23	25.3	24.99	-0.04	1.02811
		2	25.34
		3	25.33
1	CK1-OsSC32-9h	1	25.37	25.33		-0.43	1.34723
		2	25.23
		3	25.39
2	CK2-OsSC32-9h	1	25.43	25.36		-0.4	1.31951
		2	25.25
		3	25.4
3	CK3-OsSC32-9h	1	24.85	24.93		-0.83	1.77769
		2	24.88
		3	25.06
1	CK1-OsSC32-12h	1	25.35	26.66		0.18	0.882703
		2	25.35
		3	25.44
2	CK2-OsSC32-12h	1	25.34	26.53		0.05	0.965936
		2	25.24
		3	25.17
3	CK3-OsSC32-12h	1	25.31	26.46		-0.02	1.01396
		2	25.31
		3	25.31
1	CK1-OsSC32-24h	1	24.79	24.85		0.83	0.562529
		2	24.89
		3	24.87
2	CK2-OsSC32-24h	1	23.92	24.02		0	1
		2	24.08
		3	24.06
3	CK3-OsSC32-24h	1	23.93	24.03		0.01	0.993092
		2	24.09
		3	24.07
1	CK1-OsSC32-48h	1	22.25	22.35		0.2	0.870551
		2	22.41
		3	22.39
2	CK2-OsSC32-48h	1	22.22	22.16		0.01	0.993092
		2	22.08
		3	22.18
3	CK3-OsSC32-48h	1	22.13	22.23		0.08	0.946058
		2	22.22
		3	22.34

## Sheet: OsSC34
qRT-PCR raw data for CK treatment of OsSC34
Biological replicates	Sample Name	Technical replicates	Cq	Cq Mean (Technical replicates)	Cq Mean (Biological replicates)	ΔCq	2-ΔCq
1	CK1-Actin-1h	1	26.45		26.42	26.37
		2	26.33
		3	26.48
2	CK2-Actin-1h	1	26.41		26.43	26.37
		2	26.48
		3	26.4
3	CK3-Actin-1h	1	26.29		26.27	26.37
		2	26.22
		3	26.3
1	CK1-Actin-2h	1	26.59		26.47	26.42
		2	26.36
		3	26.46
2	CK2-Actin-2h	1	26.26		26.36	26.42
		2	26.37
		3	26.45
3	CK3-Actin-2h	1	26.45		26.43	26.42
		2	26.4
		3	26.44
1	CK1-Actin-4h	1	25.33		25.29	25.97
		2	25.22
		3	25.32
2	CK2-Actin-4h	1	26.25		26.25	25.97
		2	26.29
		3	26.21
3	CK3-Actin-4h	1	26.48		26.36	25.97
		2	26.29
		3	26.31
1	CK1-Actin-6h	1	25.5		25.53	24.23
		2	25.44
		3	25.65
2	CK2-Actin-6h	1	23.18		23.19	24.23
		2	23.17
		3	23.22
3	CK3-Actin-6h	1	23.92		23.96	24.23
		2	23.92
		3	24.04
1	CK1-Actin-9h	1	26.47		26.55	26.51
		2	26.65
		3	26.53
2	CK2-Actin-9h	1	26.51		26.57	26.51
		2	26.55
		3	26.65
3	CK3-Actin-9h	1	26.37		26.42	26.51
		2	26.37
		3	26.52
1	CK1-Actin-12h	1	26.38		26.33	26.36
		2	26.31
		3	26.3
2	CK2-Actin-12h	1	26.3		26.34	26.36
		2	26.42
		3	26.3
3	CK3-Actin-12h	1	26.55		26.42	26.36
		2	26.34
		3	26.37
1	CK1-Actin-24h	1	25.7		25.79	25.57
		2	25.75
		3	25.92
2	CK2-Actin-24h	1	25.33		25.43	25.57
		2	25.48
		3	25.48
3	CK3-Actin-24h	1	25.41		25.5	25.57
		2	25.48
		3	25.61
1	CK1-Actin-48h	1	25.61		25.54	25.36
		2	25.5
		3	25.51
2	CK2-Actin-48h	1	25.35		25.32	25.36
		2	25.38
		3	25.23
3	CK3-Actin-48h	1	25.28		25.23	25.36
		2	25.19
		3	25.22
1	CK1-OsSC34-1h	1	26.64		26.71	26.58	0.34	0.790041
		2	26.79
		3	26.7
2	CK2-OsSC34-1h	1	26.42		26.53	26.58	0.16	0.895025
		2	26.54
		3	26.63
3	CK3-OsSC34-1h	1	26.48		26.51	26.58	0.14	0.907519
		2	26.63
		3	26.42
1	CK1-OsSC34-2h	1	25.79		25.89	25.88	-0.53	1.44393
		2	25.89
		3	25.99
2	CK2-OsSC34-2h	1	25.76		25.86	25.88	-0.56	1.47427
		2	25.96
		3	25.86
3	CK3-OsSC34-2h	1	25.93		25.89	25.88	-0.53	1.44393
		2	25.88
		3	25.86
1	CK1-OsSC34-4h	1	25.89		25.87	25.82	-0.1	1.07177
		2	25.95
		3	25.77
2	CK2-OsSC34-4h	1	25.86		25.82	25.82	-0.15	1.10957
		2	25.88
		3	25.72
3	CK3-OsSC34-4h	1	25.79		25.76	25.82	-0.21	1.15669
		2	25.73
		3	25.76
1	CK1-OsSC34-6h	1	25.18		25.11	25.19	0.88	0.543367
		2	25.08
		3	25.07
2	CK2-OsSC34-6h	1	25.22		25.24	25.19	1.01	0.496546
		2	25.28
		3	25.22
3	CK3-OsSC34-6h	1	25.16		25.21	25.19	0.98	0.50698
		2	25.27
		3	25.2
1	CK1-OsSC34-9h	1	25.35		25.38	25.31	-1.13	2.18859
		2	25.35
		3	25.44
2	CK2-OsSC34-9h	1	25.34		25.25	25.31	-1.26	2.39496
		2	25.24
		3	25.17
3	CK3-OsSC34-9h	1	25.31		25.31	25.31	-1.2	2.2974
		2	25.31
		3	25.31
1	CK1-OsSC34-12h	1	25.35		25.38	25.31	-1.13	2.18859
		2	25.35
		3	25.44
2	CK2-OsSC34-12h	1	25.34		25.25	25.31	-1.26	2.39496
		2	25.24
		3	25.17
3	CK3-OsSC34-12h	1	25.31		25.31	25.31	-1.2	2.2974
		2	25.31
		3	25.31
1	CK1-OsSC34-24h	1	26.71		26.72	26.72	1.15	0.450625
		2	26.77
		3	26.68
2	CK2-OsSC34-24h	1	26.67		26.75	26.72	1.18	0.441351
		2	26.82
		3	26.82
3	CK3-OsSC34-24h	1	26.58		26.68	26.72	1.11	0.463294
		2	26.79
		3	26.67
1	CK1-OsSC34-48h	1	26.36		26.46	26.44	1.1	0.466516
		2	26.57
		3	26.45
2	CK2-OsSC34-48h	1	26.31		26.33	26.44	0.97	0.510506
		2	26.28
		3	26.4
3	CK3-OsSC34-48h	1	26.48		26.52	26.44	1.16	0.447513
		2	26.46
		3	26.62

## Sheet: OsSC25
qRT-PCR raw data for CK treatment of OsSC25
Biological replicates	Sample Name	Technical replicates	Cq	Cq Mean (Technical replicates)	Cq Mean (Biological replicates)	ΔCq	2-ΔCq
1	CK1-Actin-1h	1	25.18	25.19	25.12
		2	25.19
		3	25.2
2	CK2-Actin-1h	1	25.07	25.12	25.12
		2	25.16
		3	25.13
3	CK3-Actin-1h	1	25.1	25.05	25.12
		2	25.01
		3	25.04
1	CK1-Actin-2h	1	25.1	25.06	25.06
		2	25.12
		3	24.96
2	CK2-Actin-2h	1	25.04	25.09	25.06
		2	25.14
		3	25.09
3	CK3-Actin-2h	1	25.07	25.04	25.06
		2	24.96
		3	25.09
1	CK1-Actin-4h	1	25.52	25.42	25.51
		2	25.35
		3	25.39
2	CK2-Actin-4h	1	25.76	25.72	25.51
		2	25.67
		3	25.73
3	CK3-Actin-4h	1	25.36	25.4	25.51
		2	25.32
		3	25.52
1	CK1-Actin-6h	1	25.19	25.25	25.34
		2	25.24
		3	25.32
2	CK2-Actin-6h	1	25.43	25.39	25.34
		2	25.38
		3	25.36
3	CK3-Actin-6h	1	25.45	25.37	25.34
		2	25.35
		3	25.31
1	CK1-Actin-9h	1	25.94	25.83	25.76
		2	25.8
		3	25.75
2	CK2-Actin-9h	1	25.78	25.82	25.76
		2	25.82
		3	25.86
3	CK3-Actin-9h	1	25.68	25.62	25.76
		2	25.51
		3	25.67
1	CK1-Actin-12h	1	26.78	26.8	26.48
		2	26.84
		3	26.78
2	CK2-Actin-12h	1	26.3	26.26	26.48
		2	26.17
		3	26.31
3	CK3-Actin-12h	1	26.28	26.39	26.48
		2	26.5
		3	26.39
1	CK1-Actin-24h	1	23.8	23.83	24.02
		2	23.78
		3	23.91
2	CK2-Actin-24h	1	24.04	24.1	24.02
		2	24.2
		3	24.06
3	CK3-Actin-24h	1	24.03	24.13	24.02
		2	24.25
		3	24.11
1	CK1-Actin-48h	1	22.04	22.11	22.15
		2	22.13
		3	22.16
2	CK2-Actin-48h	1	22.16	22.08	22.15
		2	22
		3	22.08
3	CK3-Actin-48h	1	22.18	22.27	22.15
		2	22.38
		3	22.25
1	CK1-OsSC25-1h	1	30.37	30.44		5.32	0.0250334
		2	30.43
		3	30.52
2	CK2-OsSC25-1h	1	30	30.02		4.9	0.0334929
		2	30.12
		3	29.94
3	CK3-OsSC25-1h	1	30	30.08		4.96	0.0321286
		2	30.2
		3	30.04
1	CK1-OsSC25-2h	1	30.37	30.47		5.41	0.0235195
		2	30.58
		3	30.46
2	CK2-OsSC25-2h	1	31.04	30.91		5.85	0.017337
		2	30.89
		3	30.8
3	CK3-OsSC25-2h	1	30.67	30.62		5.56	0.0211969
		2	30.51
		3	30.68
1	CK1-OsSC25-4h	1	30.71	30.73		5.22	0.0268302
		2	30.71
		3	30.77
2	CK2-OsSC25-4h	1	31.29	31.37		5.86	0.0172173
		2	31.47
		3	31.35
3	CK3-OsSC25-4h	1	31.21	31.22		5.71	0.0191038
		2	31.28
		3	31.17
1	CK1-OsSC25-6h	1	30.95	31		5.66	0.0197774
		2	31.07
		3	30.98
2	CK2-OsSC25-6h	1	31.01	31.1		5.76	0.018453
		2	31.14
		3	31.15
3	CK3-OsSC25-6h	1	31.21	31.14		5.8	0.0179484
		2	31.05
		3	31.16
1	CK1-OsSC25-9h	1	31.18	31.16		5.4	0.0236831
		2	31.13
		3	31.17
2	CK2-OsSC25-9h	1	31.2	31.31		5.55	0.0213444
		2	31.38
		3	31.35
3	CK3-OsSC25-9h	1	31.22	31.26		5.5	0.0220971
		2	31.29
		3	31.27
1	CK1-OsSC25-12h	1	25.35	31.16		5.4	0.0236831
		2	25.35
		3	25.44
2	CK2-OsSC25-12h	1	25.34	31.31		5.55	0.0213444
		2	25.24
		3	25.17
3	CK3-OsSC25-12h	1	25.31	31.58		5.1	0.0291573
		2	25.31
		3	25.31
1	CK1-OsSC25-24h	1	29.78	29.71		5.69	0.0193704
		2	29.67
		3	29.68
2	CK2-OsSC25-24h	1	29.54	29.61		5.59	0.0207607
		2	29.68
		3	29.5
3	CK3-OsSC25-24h	1	29.62	29.58		5.56	0.0211969
		2	29.65
		3	29.47
1	CK1-OsSC25-48h	1	27.55	27.51		5.36	0.0243489
		2	27.58
		3	27.4
2	CK2-OsSC25-48h	1	27.4	27.29		5.14	0.02836
		2	27.19
		3	27.28
3	CK3-OsSC25-48h	1	27.33	27.29		5.14	0.02836
		2	27.24
		3	27.3

## Sheet: OsSR45a
qRT-PCR raw data for CK treatment of OsSR45a
Biological replicates	Sample Name	Technical replicates	Cq	Cq Mean (Technical replicates)	Cq Mean (Biological replicates)	ΔCq	2-ΔCq
1	CK1-Actin-1h	1	25.24	25.19	25.12
		2	25.14
		3	25.19
2	CK2-Actin-1h	1	25.12	25.12	25.12
		2	25.1
		3	25.14
3	CK3-Actin-1h	1	25.05	25.05	25.12
		2	25.07
		3	25.03
1	CK1-Actin-2h	1	25.14	25.06	25.06
		2	25.01
		3	25.03
2	CK2-Actin-2h	1	25.19	25.09	25.06
		2	25.07
		3	25.01
3	CK3-Actin-2h	1	25.1	25.04	25.06
		2	24.94
		3	25.08
1	CK1-Actin-4h	1	25.43	25.42	25.51
		2	25.37
		3	25.46
2	CK2-Actin-4h	1	25.79	25.72	25.51
		2	25.67
		3	25.7
3	CK3-Actin-4h	1	25.51	25.4	25.51
		2	25.29
		3	25.4
1	CK1-Actin-6h	1	25.24	25.25	25.34
		2	25.18
		3	25.33
2	CK2-Actin-6h	1	25.31	25.39	25.34
		2	25.36
		3	25.5
3	CK3-Actin-6h	1	25.38	25.37	25.34
		2	25.33
		3	25.4
1	CK1-Actin-9h	1	25.72	25.83	25.76
		2	25.93
		3	25.84
2	CK2-Actin-9h	1	25.83	25.82	25.76
		2	25.79
		3	25.84
3	CK3-Actin-9h	1	25.63	25.62	25.76
		2	25.53
		3	25.7
1	CK1-Actin-12h	1	26.86	26.8	26.48
		2	26.85
		3	26.69
2	CK2-Actin-12h	1	26.2	26.26	26.48
		2	26.39
		3	26.19
3	CK3-Actin-12h	1	26.49	26.39	26.48
		2	26.28
		3	26.4
1	CK1-Actin-24h	1	23.73	23.83	24.02
		2	23.89
		3	23.87
2	CK2-Actin-24h	1	24.22	24.1	24.02
		2	24.07
		3	24.01
3	CK3-Actin-24h	1	24.06	24.13	24.02
		2	24.16
		3	24.17
1	CK1-Actin-48h	1	22.03	22.11	22.15
		2	22.14
		3	22.16
2	CK2-Actin-48h	1	22.04	22.08	22.15
		2	22
		3	22.2
3	CK3-Actin-48h	1	22.4	22.27	22.15
		2	22.16
		3	22.25
1	CK1-OsSR45a-1h	1	23.41	23.46		-1.66	3.16017
		2	23.54
		3	23.43
2	CK2-OsSR45a-1h	1	23.75	23.86		-1.26	2.39496
		2	23.86
		3	23.97
3	CK3-OsSR45a-1h	1	23.54	23.56		-1.56	2.94854
		2	23.65
		3	23.49
1	CK1-OsSR45a-2h	1	23.59	23.57		-1.49	2.80889
		2	23.46
		3	23.66
2	CK2-OsSR45a-2h	1	23.84	23.85		-1.21	2.31338
		2	23.9
		3	23.81
3	CK3-OsSR45a-2h	1	23.23	23.15		-1.91	3.75809
		2	23.13
		3	23.09
1	CK1-OsSR45a-4h	1	24.11	23.99		-1.52	2.86791
		2	23.92
		3	23.94
2	CK2-OsSR45a-4h	1	23.84	23.87		-1.64	3.11666
		2	23.89
		3	23.88
3	CK3-OsSR45a-4h	1	24.08	23.97		-1.54	2.90795
		2	23.91
		3	23.92
1	CK1-OsSR45a-6h	1	23	23.07		-2.27	4.82323
		2	23.08
		3	23.13
2	CK2-OsSR45a-6h	1	23.82	23.69		-1.65	3.13834
		2	23.67
		3	23.58
3	CK3-OsSR45a-6h	1	23.1	23.08		-2.26	4.78991
		2	22.99
		3	23.15
1	CK1-OsSR45a-9h	1	24.17	24.06		-1.7	3.24901
		2	24.05
		3	23.96
2	CK2-OsSR45a-9h	1	24.25	24.35		-1.41	2.65737
		2	24.32
		3	24.48
3	CK3-OsSR45a-9h	1	24.29	24.29		-1.47	2.77022
		2	24.24
		3	24.34
1	CK1-OsSR45a-12h	1	25.35	24.51		-1.97	3.91768
		2	25.35
		3	25.44
2	CK2-OsSR45a-12h	1	25.34	24.35		-1.41	2.65737
		2	25.24
		3	25.17
3	CK3-OsSR45a-12h	1	25.31	24.29		-1.47	2.77022
		2	25.31
		3	25.31
1	CK1-OsSR45a-24h	1	22.01	21.97		-2.05	4.14106
		2	21.94
		3	21.96
2	CK2-OsSR45a-24h	1	22.21	22.1		-1.92	3.78423
		2	22.05
		3	22.22
3	CK3-OsSR45a-24h	1	21.77	21.84		-2.18	4.53154
		2	21.79
		3	21.96
1	CK1-OsSR45a-48h	1	21.02	21.09		-1.06	2.08493
		2	21.04
		3	21.21
2	CK2-OsSR45a-48h	1	21.07	21.09		-1.06	2.08493
		2	20.98
		3	21.22
3	CK3-OsSR45a-48h	1	20.49	20.54		-1.61	3.05252
		2	20.6
		3	20.53

[truncated: 14 more sheets: OsSR45, OsRS2Z39, OsRS2Z37, OsRS2Z36, OsRS2Z38, OsRSZ21a, OsRSZ21, OsRSZ23, OsRS29, OsRS33, OsSR33, OsSR32, OsSR33a, OsSR40]
