# Supplementary material for: Comprehensive study of serine/arginine-rich (SR) gene family in rice: characterization, evolution and expression analysis
Source: PeerJ journal article supplement (doi:10.7717/peerj.16193), 2023-10-13
Supplement: qRTPCR_raw_dataTableS9S16.zip [file Supplemental Table_S11.xlsx]

## Sheet: OsSCL30a
qRT-PCR raw data for salt treatment of OsSCL30a
Biological replicates	Sample Name	Technical replicates	Cq	Cq Mean (Technical replicates)	Cq Mean (Biological replicates)	ΔCq	2-ΔCq
1	Salt1-Actin-1h	1	25.45	25.43	25.41
		2	25.42
		3	25.42
2	Salt2-Actin-1h	1	25.53	25.5	25.41
		2	25.56
		3	25.41
3	Salt3-Actin-1h	1	25.26	25.29	25.41
		2	25.23
		3	25.38
1	Salt1-Actin-2h	1	26.36	26.27	26.26
		2	26.17
		3	26.28
2	Salt2-Actin-2h	1	26.22	26.3	26.26
		2	26.34
		3	26.34
3	Salt3-Actin-2h	1	26.14	26.2	26.26
		2	26.14
		3	26.32
1	Salt1-Actin-4h	1	26.64	26.72	26.81
		2	26.77
		3	26.75
2	Salt2-Actin-4h	1	26.97	26.91	26.81
		2	26.83
		3	26.93
3	Salt3-Actin-4h	1	26.8	26.8	26.81
		2	26.86
		3	26.74
1	Salt1-Actin-6h	1	26.29	26.26	26.21
		2	26.25
		3	26.24
2	Salt2-Actin-6h	1	26.32	26.24	26.21
		2	26.22
		3	26.18
3	Salt3-Actin-6h	1	26.12	26.13	26.21
		2	26.08
		3	26.19
1	Salt1-Actin-9h	1	27.02	27.02	27.09
		2	26.95
		3	27.09
2	Salt2-Actin-9h	1	27.01	27.1	27.09
		2	27.13
		3	27.16
3	Salt3-Actin-9h	1	27.22	27.14	27.09
		2	27.16
		3	27.04
1	Salt1-Actin-12h	1	26.62	26.65	26.51
		2	26.69
		3	26.64
2	Salt2-Actin-12h	1	26.54	26.55	26.51
		2	26.62
		3	26.49
3	Salt3-Actin-12h	1	26.25	26.32	26.51
		2	26.42
		3	26.29
1	Salt1-Actin-24h	1	26.66	26.64	26.81
		2	26.71
		3	26.55
2	Salt2-Actin-24h	1	26.86	26.77	26.81
		2	26.73
		3	26.72
3	Salt3-Actin-24h	1	27.04	27.01	26.81
		2	27.06
		3	26.93
1	Salt1-Actin-48h	1	27.14	27.11	26.97
		2	27.18
		3	27.01
2	Salt2-Actin-48h	1	26.85	26.88	26.97
		2	26.86
		3	26.93
3	Salt3-Actin-48h	1	26.89	26.91	26.97
		2	26.96
		3	26.88
1	Salt1-OsSCL30a-1h	1	27.96	28.03		2.62333	0.162292
		2	28.13
		3	28
2	Salt2-OsSCL30a-1h	1	27.99	27.98		2.57333	0.168016
		2	28.08
		3	27.87
3	Salt3-OsSCL30a-1h	1	27.88	27.86		2.45333	0.182588
		2	27.76
		3	27.94
1	Salt1-OsSCL30a-2h	1	28.46	28.36		2.10333	0.23272
		2	28.32
		3	28.3
2	Salt2-OsSCL30a-2h	1	28.3	28.39		2.13333	0.227931
		2	28.47
		3	28.4
3	Salt3-OsSCL30a-2h	1	28.12	28.21		1.95333	0.258219
		2	28.33
		3	28.18
1	Salt1-OsSCL30a-4h	1	28.57	28.5		1.69	0.309927
		2	28.49
		3	28.44
2	Salt2-OsSCL30a-4h	1	28.42	28.34		1.53	0.346277
		2	28.33
		3	28.27
3	Salt3-OsSCL30a-4h	1	28.81	28.7		1.89	0.269807
		2	28.63
		3	28.66
1	Salt1-OsSCL30a-6h	1	29.49	29.42		3.21	0.108067
		2	29.45
		3	29.32
2	Salt2-OsSCL30a-6h	1	29.25	29.16		2.95	0.129408
		2	29.14
		3	29.09
3	Salt3-OsSCL30a-6h	1	29.16	29.09		2.88	0.135842
		2	29.1
		3	29.01
1	Salt1-OsSCL30a-9h	1	30.04	30.07		2.98333	0.126452
		2	29.98
		3	30.19
2	Salt2-OsSCL30a-9h	1	29.69	29.77		2.68333	0.155681
		2	29.74
		3	29.88
3	Salt3-OsSCL30a-9h	1	29.99	29.93		2.84333	0.139339
		2	29.9
		3	29.9
1	Salt1-OsSCL30a-12h	1	29.41	29.4		2.89333	0.134592
		2	29.36
		3	29.43
2	Salt2-OsSCL30a-12h	1	29.23	29.34		2.83333	0.140308
		2	29.35
		3	29.44
3	Salt3-OsSCL30a-12h	1	29.5	29.59		3.08333	0.117984
		2	29.7
		3	29.57
1	Salt1-OsSCL30a-24h	1	29.74	29.82		3.01333	0.12385
		2	29.86
		3	29.86
2	Salt2-OsSCL30a-24h	1	29.52	29.62		2.81333	0.142266
		2	29.68
		3	29.66
3	Salt3-OsSCL30a-24h	1	29.54	29.64		2.83333	0.140308
		2	29.7
		3	29.68
1	Salt1-OsSCL30a-48h	1	28.51	28.61		1.64	0.320856
		2	28.67
		3	28.65
2	Salt2-OsSCL30a-48h	1	28.44	28.34		1.37	0.386891
		2	28.26
		3	28.32
3	Salt3-OsSCL30a-48h	1	28.47	28.37		1.4	0.378929
		2	28.37
		3	28.27

## Sheet: OsSCL30
qRT-PCR raw data for salt treatment of OsSCL30
Biological replicates	Sample Name	Technical replicates	Cq	Cq Mean (Technical replicates)	Cq Mean (Biological replicates)	ΔCq	2-ΔCq
1	Salt1-Actin-1h	1	27.48	27.59	27.72
		2	27.61
		3	27.68
2	Salt2-Actin-1h	1	27.72	27.75	27.72
		2	27.72
		3	27.81
3	Salt3-Actin-1h	1	27.85	27.82	27.72
		2	27.85
		3	27.76
1	Salt1-Actin-2h	1	28.33	28.29	28.19
		2	28.2
		3	28.34
2	Salt2-Actin-2h	1	28.04	28.1	28.19
		2	28.11
		3	28.15
3	Salt3-Actin-2h	1	28.13	28.18	28.19
		2	28.18
		3	28.23
1	Salt1-Actin-4h	1	27.38	27.48	27.95
		2	27.52
		3	27.54
2	Salt2-Actin-4h	1	28.28	28.31	27.95
		2	28.31
		3	28.34
3	Salt3-Actin-4h	1	28.08	28.06	27.95
		2	28.09
		3	28.01
1	Salt1-Actin-6h	1	28.56	28.45	27.95
		2	28.44
		3	28.35
2	Salt2-Actin-6h	1	27.77	27.87	27.95
		2	27.87
		3	27.97
3	Salt3-Actin-6h	1	27.64	27.54	27.95
		2	27.55
		3	27.43
1	Salt1-Actin-9h	1	28.43	28.54	28.51
		2	28.63
		3	28.56
2	Salt2-Actin-9h	1	28.14	28.22	28.51
		2	28.22
		3	28.3
3	Salt3-Actin-9h	1	28.74	28.76	28.51
		2	28.88
		3	28.66
1	Salt1-Actin-12h	1	28.99	29.06	28.92
		2	29.1
		3	29.09
2	Salt2-Actin-12h	1	28.76	28.84	28.92
		2	28.83
		3	28.93
3	Salt3-Actin-12h	1	28.82	28.85	28.92
		2	28.88
		3	28.85
1	Salt1-Actin-24h	1	28.68	28.7	28.64
		2	28.82
		3	28.6
2	Salt2-Actin-24h	1	28.55	28.63	28.64
		2	28.71
		3	28.63
3	Salt3-Actin-24h	1	28.56	28.6	28.64
		2	28.69
		3	28.55
1	Salt1-Actin-48h	1	28.12	28.11	27.62
		2	28.06
		3	28.15
2	Salt2-Actin-48h	1	26.74	26.73	27.62
		2	26.79
		3	26.66
3	Salt3-Actin-48h	1	28.14	28.02	27.62
		2	28.01
		3	27.91
1	Salt1-OsSCL30-1h	1	32.52	32.45		4.73	0.0376815
		2	32.37
		3	32.46
2	Salt2-OsSCL30-1h	1	31.82	31.84		4.12	0.0575117
		2	31.88
		3	31.82
3	Salt3-OsSCL30-1h	1	32.66	32.7		4.98	0.0316862
		2	32.75
		3	32.69
1	Salt1-OsSCL30-2h	1	32.46	32.49		4.3	0.0507658
		2	32.5
		3	32.51
2	Salt2-OsSCL30-2h	1	31.95	31.93		3.74	0.0748424
		2	31.93
		3	31.91
3	Salt3-OsSCL30-2h	1	32.25	32.18		3.99	0.0629347
		2	32.11
		3	32.18
1	Salt1-OsSCL30-4h	1	31.84	31.94		3.99	0.0629347
		2	32.01
		3	31.97
2	Salt2-OsSCL30-4h	1	31.91	31.95		4	0.0625
		2	32.03
		3	31.91
3	Salt3-OsSCL30-4h	1	31.85	31.91		3.96	0.0642571
		2	32.01
		3	31.87
1	Salt1-OsSCL30-6h	1	31.44	31.47		3.52	0.0871715
		2	31.48
		3	31.49
2	Salt2-OsSCL30-6h	1	31.44	31.46		3.51	0.0877778
		2	31.52
		3	31.42
3	Salt3-OsSCL30-6h	1	32.17	32.27		4.32	0.0500669
		2	32.25
		3	32.39
1	Salt1-OsSCL30-9h	1	31.9	31.99		3.48	0.0896222
		2	31.95
		3	32.12
2	Salt2-OsSCL30-9h	1	33.07	32.96		4.45	0.0457527
		2	32.9
		3	32.91
3	Salt3-OsSCL30-9h	1	32.03	32.06		3.55	0.0853775
		2	32.16
		3	31.99
1	Salt1-OsSCL30-12h	1	32.21	32.18		3.26	0.104386
		2	32.07
		3	32.26
2	Salt2-OsSCL30-12h	1	32.23	32.23		3.31	0.10083
		2	32.13
		3	32.33
3	Salt3-OsSCL30-12h	1	32.84	32.78		3.86	0.0688691
		2	32.73
		3	32.77
1	Salt1-OsSCL30-24h	1	31.99	32.04		3.4	0.0947323
		2	31.96
		3	32.17
2	Salt2-OsSCL30-24h	1	32.6	32.53		3.89	0.0674518
		2	32.55
		3	32.53
3	Salt3-OsSCL30-24h	1	31.68	31.7		3.06	0.119908
		2	31.72
		3	31.7
1	Salt1-OsSCL30-48h	1	31.83	31.85		4.23	0.0532897
		2	31.87
		3	31.85
2	Salt2-OsSCL30-48h	1	31.3	31.39		3.77	0.0733022
		2	31.45
		3	31.42
3	Salt3-OsSCL30-48h	1	31.52	31.5		3.88	0.0679209
		2	31.54
		3	31.44	1h		0.0575117	0.0316862

## Sheet: OsSCL57
qRT-PCR raw data for salt treatment of OsSCL57
Biological replicates	Sample Name	Technical replicates	Cq	Cq Mean (Technical replicates)	Cq Mean (Biological replicates)	ΔCq	2-ΔCq
1	Salt1-Actin-1h	1	25.72	25.69	25.64
		2	25.7
		3	25.65
2	Salt2-Actin-1h	1	25.61	25.63	25.64
		2	25.7
		3	25.53
3	Salt3-Actin-1h	1	25.58	25.61	25.64
		2	25.54
		3	25.71
1	Salt1-Actin-2h	1	26.38	26.49	26.35
		2	26.53
		3	26.56
2	Salt2-Actin-2h	1	26.25	26.28	26.35
		2	26.37
		3	26.22
3	Salt3-Actin-2h	1	26.26	26.28	26.35
		2	26.27
		3	26.31
1	Salt1-Actin-4h	1	26.21	26.26	26.23
		2	26.28
		3	26.29
2	Salt2-Actin-4h	1	26.17	26.13	26.23
		2	26.13
		3	26.09
3	Salt3-Actin-4h	1	26.19	26.29	26.23
		2	26.29
		3	26.39
1	Salt1-Actin-6h	1	26.18	26.24	26.18
		2	26.23
		3	26.31
2	Salt2-Actin-6h	1	26.1	26.1	26.18
		2	26.13
		3	26.07
3	Salt3-Actin-6h	1	26.27	26.21	26.18
		2	26.14
		3	26.22
1	Salt1-Actin-9h	1	26.97	27.07	27.05
		2	27.11
		3	27.13
2	Salt2-Actin-9h	1	27.08	27.03	27.05
		2	27.04
		3	26.97
3	Salt3-Actin-9h	1	27.05	27.05	27.05
		2	26.94
		3	27.16
1	Salt1-Actin-12h	1	26.74	26.69	26.6
		2	26.75
		3	26.58
2	Salt2-Actin-12h	1	26.71	26.6	26.6
		2	26.59
		3	26.5
3	Salt3-Actin-12h	1	26.45	26.5	26.6
		2	26.47
		3	26.58
1	Salt1-Actin-24h	1	26.75	26.77	26.94
		2	26.82
		3	26.74
2	Salt2-Actin-24h	1	26.87	26.93	26.94
		2	26.87
		3	27.05
3	Salt3-Actin-24h	1	27.01	27.12	26.94
		2	27.12
		3	27.23
1	Salt1-Actin-48h	1	27.04	27.11
		2	27.21
		3	27.08
2	Salt2-Actin-48h	1	26.92	26.88
		2	26.77
		3	26.95
3	Salt3-Actin-48h	1	26.84	26.91
		2	26.87
		3	27.02
1	Salt1-OsSCL57-1h	1	28.23	28.32		2.67667	0.156402
		2	28.3
		3	28.43
2	Salt2-OsSCL57-1h	1	28.5	28.39		2.74667	0.148995
		2	28.3
		3	28.37
3	Salt3-OsSCL57-1h	1	28.69	28.59		2.94667	0.129707
		2	28.49
		3	28.59
1	Salt1-OsSCL57-2h	1	28.7	28.61		2.26	0.208772
		2	28.55
		3	28.58
2	Salt2-OsSCL57-2h	1	28.76	28.63		2.28	0.205898
		2	28.58
		3	28.55
3	Salt3-OsSCL57-2h	1	28.39	28.49		2.14	0.22688
		2	28.58
		3	28.5
1	Salt1-OsSCL57-4h	1	27.32	27.42		1.19333	0.437291
		2	27.4
		3	27.54
2	Salt2-OsSCL57-4h	1	27.54	27.58		1.35333	0.391387
		2	27.6
		3	27.6
3	Salt3-OsSCL57-4h	1	27.65	27.56		1.33333	0.39685
		2	27.51
		3	27.52
1	Salt1-OsSCL57-6h	1	27.3	27.26		1.07667	0.474123
		2	27.24
		3	27.24
2	Salt2-OsSCL57-6h	1	27.43	27.43		1.24667	0.421421
		2	27.45
		3	27.41
3	Salt3-OsSCL57-6h	1	27.31	27.38		1.19667	0.436282
		2	27.5
		3	27.33
1	Salt1-OsSCL57-9h	1	27.4	27.44		0.39	0.76313
		2	27.47
		3	27.45
2	Salt2-OsSCL57-9h	1	27.35	27.43		0.38	0.768438
		2	27.4
		3	27.54
3	Salt3-OsSCL57-9h	1	27.46	27.48		0.43	0.742262
		2	27.4
		3	27.58
1	Salt1-OsSCL57-12h	1	27.58	27.61		1.01333	0.4954
		2	27.59
		3	27.66
2	Salt2-OsSCL57-12h	1	27.41	27.51		0.913333	0.530957
		2	27.52
		3	27.6
3	Salt3-OsSCL57-12h	1	27.44	27.55		0.953333	0.516438
		2	27.59
		3	27.62
1	Salt1-OsSCL57-24h	1	27.44	27.5		0.56	0.678302
		2	27.62
		3	27.44
2	Salt2-OsSCL57-24h	1	27.87	27.88		0.94	0.521233
		2	28
		3	27.98
3	Salt3-OsSCL57-24h	1	27.58	27.6		0.66	0.632878
		2	27.72
		3	27.71
1	Salt1-OsSCL57-48h	1	27.03	27.06		0.0933333	0.937354
		2	26.98
		3	27.17
2	Salt2-OsSCL57-48h	1	27.05	27.03		0.0633333	0.95705
		2	27.07
		3	26.97
3	Salt3-OsSCL57-48h	1	26.92	26.94		-0.0266667	1.01866
		2	26.96
		3	26.94

## Sheet: OsSCL28
qRT-PCR raw data for salt treatment of OsSCL28
Biological replicates	Sample Name	Technical replicates	Cq	Cq Mean (Technical replicates)	Cq Mean (Biological replicates)	ΔCq	2-ΔCq
1	Salt1-Actin-1h	1	27.6	27.59	27.72
		2	27.53
		3	27.64
2	Salt2-Actin-1h	1	27.76	27.75	27.72
		2	27.77
		3	27.72
3	Salt3-Actin-1h	1	27.81	27.82	27.72
		2	27.8
		3	27.85
1	Salt1-Actin-2h	1	28.28	28.29	28.19
		2	28.32
		3	28.27
2	Salt2-Actin-2h	1	28.04	28.1	28.19
		2	28.12
		3	28.14
3	Salt3-Actin-2h	1	28.15	28.18	28.19
		2	28.25
		3	28.14
1	Salt1-Actin-4h	1	27.48	27.48	27.95
		2	27.53
		3	27.43
2	Salt2-Actin-4h	1	28.34	28.31	27.95
		2	28.34
		3	28.25
3	Salt3-Actin-4h	1	28.08	28.06	27.95
		2	28.11
		3	27.99
1	Salt1-Actin-6h	1	28.38	28.45	27.95
		2	28.53
		3	28.44
2	Salt2-Actin-6h	1	27.92	27.87	27.95
		2	27.78
		3	27.91
3	Salt3-Actin-6h	1	27.6	27.54	27.95
		2	27.52
		3	27.5
1	Salt1-Actin-9h	1	28.43	28.54	28.51
		2	28.64
		3	28.55
2	Salt2-Actin-9h	1	28.28	28.22	28.51
		2	28.27
		3	28.11
3	Salt3-Actin-9h	1	28.78	28.76	28.51
		2	28.69
		3	28.81
1	Salt1-Actin-12h	1	29.1	29.06	28.92
		2	29.07
		3	29.01
2	Salt2-Actin-12h	1	28.83	28.84	28.92
		2	28.91
		3	28.78
3	Salt3-Actin-12h	1	28.88	28.85	28.92
		2	28.79
		3	28.88
1	Salt1-Actin-24h	1	28.82	28.7	28.64
		2	28.68
		3	28.6
2	Salt2-Actin-24h	1	28.55	28.63	28.64
		2	28.64
		3	28.7
3	Salt3-Actin-24h	1	28.65	28.6	28.64
		2	28.61
		3	28.54
1	Salt1-Actin-48h	1	28.08	28.11	27.62
		2	28.01
		3	28.24
2	Salt2-Actin-48h	1	26.74	26.73	27.62
		2	26.76
		3	26.69
3	Salt3-Actin-48h	1	27.95	28.02	27.62
		2	28.11
		3	28
1	Salt1-OsSCL28-1h	1	31.97	32.05		4.33	0.049721
		2	32.03
		3	32.15
2	Salt2-OsSCL28-1h	1	32.05	32.07		4.35	0.0490365
		2	32.07
		3	32.09
3	Salt3-OsSCL28-1h	1	31.51	31.62		3.9	0.0669858
		2	31.62
		3	31.73
1	Salt1-OsSCL28-2h	1	32.54	32.44		4.25	0.052556
		2	32.38
		3	32.4
2	Salt2-OsSCL28-2h	1	32.71	32.73		4.54	0.0429857
		2	32.86
		3	32.62
3	Salt3-OsSCL28-2h	1	32.3	32.31		4.12	0.0575117
		2	32.37
		3	32.26
1	Salt1-OsSCL28-4h	1	31.98	32.08		4.13	0.0571145
		2	32.21
		3	32.05
2	Salt2-OsSCL28-4h	1	31.1	31.16		3.21	0.108067
		2	31.25
		3	31.13
3	Salt3-OsSCL28-4h	1	31.33	31.29		3.34	0.0987552
		2	31.21
		3	31.33
1	Salt1-OsSCL28-6h	1	31.49	31.51		3.56	0.0847878
		2	31.47
		3	31.57
2	Salt2-OsSCL28-6h	1	31.29	31.38		3.43	0.0927827
		2	31.51
		3	31.34
3	Salt3-OsSCL28-6h	1	31.95	31.97		4.02	0.0616395
		2	31.88
		3	32.08
1	Salt1-OsSCL28-9h	1	31.07	31.1		2.59	0.166086
		2	31.06
		3	31.17
2	Salt2-OsSCL28-9h	1	30.76	30.82		2.31	0.20166
		2	30.75
		3	30.95
3	Salt3-OsSCL28-9h	1	31.15	31.15		2.64	0.160428
		2	31.09
		3	31.21
1	Salt1-OsSCL28-12h	1	32.14	32.11		3.19	0.109576
		2	32.1
		3	32.09
2	Salt2-OsSCL28-12h	1	31.57	31.52		2.6	0.164938
		2	31.42
		3	31.57
3	Salt3-OsSCL28-12h	1	31.44	31.37		2.45	0.183011
		2	31.26
		3	31.41
1	Salt1-OsSCL28-24h	1	31.28	31.34		2.7	0.153893
		2	31.37
		3	31.37
2	Salt2-OsSCL28-24h	1	31.14	31.16		2.52	0.174343
		2	31.29
		3	31.2
3	Salt3-OsSCL28-24h	1	31.58	31.6		2.96	0.128514
		2	31.59
		3	31.62
1	Salt1-OsSCL28-48h	1	30.77	30.88		3.26	0.104386
		2	30.88
		3	30.99
2	Salt2-OsSCL28-48h	1	30.84	30.87		3.25	0.105112
		2	30.78
		3	30.99
3	Salt3-OsSCL28-48h	1	30.74	30.78		3.16	0.111878
		2	30.89
		3	30.71

## Sheet: OsSCL25
qRT-PCR raw data for salt treatment of OsSCL25
Biological replicates	Sample Name	Technical replicates	Cq	Cq Mean (Technical replicates)	Cq Mean (Biological replicates)	ΔCq	2-ΔCq
1	Salt1-Actin-1h	1	27.59	27.59	27.72
		2	27.57
		3	27.61
2	Salt2-Actin-1h	1	27.79	27.75	27.72
		2	27.69
		3	27.77
3	Salt3-Actin-1h	1	27.78	27.82	27.72
		2	27.88
		3	27.8
1	Salt1-Actin-2h	1	28.27	28.29	28.19
		2	28.28
		3	28.32
2	Salt2-Actin-2h	1	28.16	28.1	28.19
		2	28
		3	28.14
3	Salt3-Actin-2h	1	28.2	28.18	28.19
		2	28.24
		3	28.1
1	Salt1-Actin-4h	1	27.48	27.48	27.95
		2	27.53
		3	27.43
2	Salt2-Actin-4h	1	28.28	28.31	27.95
		2	28.27
		3	28.38
3	Salt3-Actin-4h	1	28.1	28.06	27.95
		2	28.05
		3	28.03
1	Salt1-Actin-6h	1	28.49	28.45	27.95
		2	28.39
		3	28.47
2	Salt2-Actin-6h	1	27.79	27.87	27.95
		2	27.93
		3	27.89
3	Salt3-Actin-6h	1	27.45	27.54	27.95
		2	27.58
		3	27.59
1	Salt1-Actin-9h	1	28.56	28.54	28.51
		2	28.62
		3	28.44
2	Salt2-Actin-9h	1	28.2	28.22	28.51
		2	28.19
		3	28.27
3	Salt3-Actin-9h	1	28.77	28.76	28.51
		2	28.68
		3	28.83
1	Salt1-Actin-12h	1	29.01	29.06	28.92
		2	29.02
		3	29.15
2	Salt2-Actin-12h	1	28.79	28.84	28.92
		2	28.81
		3	28.92
3	Salt3-Actin-12h	1	28.86	28.85	28.92
		2	28.8
		3	28.89
1	Salt1-Actin-24h	1	28.61	28.7	28.64
		2	28.7
		3	28.79
2	Salt2-Actin-24h	1	28.58	28.63	28.64
		2	28.73
		3	28.58
3	Salt3-Actin-24h	1	28.68	28.6	28.64
		2	28.59
		3	28.53
1	Salt1-Actin-48h	1	28.06	28.11	27.62
		2	28.03
		3	28.24
2	Salt2-Actin-48h	1	26.75	26.73	27.62
		2	26.75
		3	26.69
3	Salt3-Actin-48h	1	28.08	28.02	27.62
		2	28.06
		3	27.92
1	Salt1-OsSCL25-1h	1	29.07	29.17		1.45	0.366021
		2	29.22
		3	29.22
2	Salt2-OsSCL25-1h	1	29.02	29.03		1.31	0.403321
		2	29
		3	29.07
3	Salt3-OsSCL25-1h	1	29.5	29.48		1.76	0.295248
		2	29.38
		3	29.56
1	Salt1-OsSCL25-2h	1	29.36	29.38		1.19	0.438303
		2	29.38
		3	29.4
2	Salt2-OsSCL25-2h	1	30.41	30.31		2.12	0.230047
		2	30.32
		3	30.2
3	Salt3-OsSCL25-2h	1	29.47	29.48		1.29	0.408951
		2	29.53
		3	29.44
1	Salt1-OsSCL25-4h	1	29.61	29.69		1.74	0.29937
		2	29.75
		3	29.71
2	Salt2-OsSCL25-4h	1	29.71	29.79		1.84	0.279322
		2	29.9
		3	29.76
3	Salt3-OsSCL25-4h	1	30.54	30.51		2.56	0.169576
		2	30.58
		3	30.41
1	Salt1-OsSCL25-6h	1	29.84	29.89		1.94	0.260616
		2	29.82
		3	30.01
2	Salt2-OsSCL25-6h	1	29.51	29.56		1.61	0.327598
		2	29.62
		3	29.55
3	Salt3-OsSCL25-6h	1	30.17	30.2		2.25	0.210224
		2	30.23
		3	30.2
1	Salt1-OsSCL25-9h	1	29.84	29.82		1.31	0.403321
		2	29.83
		3	29.79
2	Salt2-OsSCL25-9h	1	29.67	29.59		1.08	0.473029
		2	29.53
		3	29.57
3	Salt3-OsSCL25-9h	1	29.44	29.49		0.98	0.50698
		2	29.53
		3	29.5
1	Salt1-OsSCL25-12h	1	29.98	30		1.08	0.473029
		2	30.13
		3	29.89
2	Salt2-OsSCL25-12h	1	29.75	29.63		0.71	0.61132
		2	29.62
		3	29.52
3	Salt3-OsSCL25-12h	1	30.13	30.02		1.1	0.466516
		2	30
		3	29.93
1	Salt1-OsSCL25-24h	1	29.67	29.63		0.99	0.503478
		2	29.55
		3	29.67
2	Salt2-OsSCL25-24h	1	29.14	29.23		0.59	0.664343
		2	29.23
		3	29.32
3	Salt3-OsSCL25-24h	1	29.04	29.13		0.49	0.712025
		2	29.13
		3	29.22
1	Salt1-OsSCL25-48h	1	28.69	28.78		1.16	0.447513
		2	28.78
		3	28.87
2	Salt2-OsSCL25-48h	1	28.59	28.66		1.04	0.486327
		2	28.77
		3	28.62
3	Salt3-OsSCL25-48h	1	28.42	28.38		0.76	0.590496
		2	28.32
		3	28.4

## Sheet: OsSCL26
qRT-PCR raw data for salt treatment of OsSCL26
Biological replicates	Sample Name	Technical replicates	Cq	Cq Mean (Technical replicates)	Cq Mean (Biological replicates)	ΔCq	2-ΔCq
1	Salt1-Actin-1h	1	27.54	27.59	27.72
		2	27.57
		3	27.66
2	Salt2-Actin-1h	1	27.82	27.75	27.72
		2	27.81
		3	27.62
3	Salt3-Actin-1h	1	27.75	27.82	27.72
		2	27.76
		3	27.95
1	Salt1-Actin-2h	1	28.42	28.29	28.19
		2	28.23
		3	28.22
2	Salt2-Actin-2h	1	28.2	28.1	28.19
		2	28.1
		3	28
3	Salt3-Actin-2h	1	28.24	28.18	28.19
		2	28.19
		3	28.11
1	Salt1-Actin-4h	1	27.4	27.48	27.95
		2	27.53
		3	27.51
2	Salt2-Actin-4h	1	28.21	28.31	27.95
		2	28.31
		3	28.41
3	Salt3-Actin-4h	1	28.11	28.06	27.95
		2	27.97
		3	28.1
1	Salt1-Actin-6h	1	28.45	28.45	27.95
		2	28.44
		3	28.46
2	Salt2-Actin-6h	1	27.86	27.87	27.95
		2	27.8
		3	27.95
3	Salt3-Actin-6h	1	27.44	27.54	27.95
		2	27.6
		3	27.58
1	Salt1-Actin-9h	1	28.58	28.54	28.51
		2	28.61
		3	28.43
2	Salt2-Actin-9h	1	28.22	28.22	28.51
		2	28.24
		3	28.2
3	Salt3-Actin-9h	1	28.83	28.76	28.51
		2	28.77
		3	28.68
1	Salt1-Actin-12h	1	29.07	29.06	28.92
		2	29.16
		3	28.95
2	Salt2-Actin-12h	1	28.82	28.84	28.92
		2	28.87
		3	28.83
3	Salt3-Actin-12h	1	28.91	28.85	28.92
		2	28.84
		3	28.8
1	Salt1-Actin-24h	1	28.82	28.7	28.64
		2	28.69
		3	28.59
2	Salt2-Actin-24h	1	28.64	28.63	28.64
		2	28.59
		3	28.66
3	Salt3-Actin-24h	1	28.67	28.6	28.64
		2	28.5
		3	28.63
1	Salt1-Actin-48h	1	28.1	28.11	27.62
		2	28.06
		3	28.17
2	Salt2-Actin-48h	1	26.66	26.73	27.62
		2	26.71
		3	26.82
3	Salt3-Actin-48h	1	27.99	28.02	27.62
		2	28.09
		3	27.98
1	Salt1-OsSCL26-1h	1	30.54	30.53		2.81	0.142595
		2	30.52
		3	30.53
2	Salt2-OsSCL26-1h	1	33.76	33.71		5.99	0.0157337
		2	33.62
		3	33.75
3	Salt3-OsSCL26-1h	1	30.04	30		2.28	0.205898
		2	30
		3	29.96
1	Salt1-OsSCL26-2h	1	29.01	28.93		0.74	0.598739
		2	28.94
		3	28.84
2	Salt2-OsSCL26-2h	1	29.06	28.99		0.8	0.574349
		2	29.03
		3	28.88
3	Salt3-OsSCL26-2h	1	29.71	29.69		1.5	0.353553
		2	29.64
		3	29.72
1	Salt1-OsSCL26-4h	1	28.61	28.66		0.71	0.61132
		2	28.64
		3	28.73
2	Salt2-OsSCL26-4h	1	28.81	28.8		0.85	0.554785
		2	28.7
		3	28.89
3	Salt3-OsSCL26-4h	1	29.22	29.1		1.15	0.450625
		2	29.01
		3	29.07
1	Salt1-OsSCL26-6h	1	29.69	29.72		1.77	0.293209
		2	29.77
		3	29.7
2	Salt2-OsSCL26-6h	1	30.62	30.64		2.69	0.154963
		2	30.71
		3	30.59
3	Salt3-OsSCL26-6h	1	30.19	30.25		2.3	0.203063
		2	30.18
		3	30.38
1	Salt1-OsSCL26-9h	1	32.22	32.24		3.73	0.075363
		2	32.37
		3	32.13
2	Salt2-OsSCL26-9h	1	31.69	31.77		3.26	0.104386
		2	31.82
		3	31.8
3	Salt3-OsSCL26-9h	1	31.99	32.05		3.54	0.0859714
		2	32.01
		3	32.15
1	Salt1-OsSCL26-12h	1	31.79	31.77		2.85	0.138696
		2	31.74
		3	31.78
2	Salt2-OsSCL26-12h	1	33.23	33.3		4.38	0.0480273
		2	33.37
		3	33.3
3	Salt3-OsSCL26-12h	1	32.52	32.58		3.66	0.0791098
		2	32.68
		3	32.54
1	Salt1-OsSCL26-24h	1	32.33	32.24		3.6	0.0824692
		2	32.22
		3	32.17
2	Salt2-OsSCL26-24h	1	31.71	31.65		3.01	0.124137
		2	31.67
		3	31.54
3	Salt3-OsSCL26-24h	1	32.47	32.38		3.74	0.0748424
		2	32.4
		3	32.27
1	Salt1-OsSCL26-48h	1	31.91	31.82		4.2	0.0544094
		2	31.84
		3	31.71
2	Salt2-OsSCL26-48h	1	32.36	32.41		4.79	0.0361465
		2	32.38
		3	32.49
3	Salt3-OsSCL26-48h	1	31.4	31.41		3.79	0.072293
		2	31.35
		3	31.48

## Sheet: OsSC32
qRT-PCR raw data for salt treatment of OsSC32
Biological replicates	Sample Name	Technical replicates	Cq	Cq Mean (Technical replicates)	Cq Mean (Biological replicates)	ΔCq	2-ΔCq
1	Salt1-Actin-1h	1	27.52	27.59	27.72
		2	27.64
		3	27.61
2	Salt2-Actin-1h	1	27.78	27.75	27.72
		2	27.71
		3	27.76
3	Salt3-Actin-1h	1	27.79	27.82	27.72
		2	27.86
		3	27.81
1	Salt1-Actin-2h	1	28.36	28.29	28.19
		2	28.32
		3	28.19
2	Salt2-Actin-2h	1	28.23	28.1	28.19
		2	28.08
		3	27.99
3	Salt3-Actin-2h	1	28.08	28.18	28.19
		2	28.15
		3	28.31
1	Salt1-Actin-4h	1	27.47	27.48	27.95
		2	27.48
		3	27.49
2	Salt2-Actin-4h	1	28.43	28.31	27.95
		2	28.2
		3	28.3
3	Salt3-Actin-4h	1	28.06	28.06	27.95
		2	28.08
		3	28.04
1	Salt1-Actin-6h	1	28.39	28.45	27.95
		2	28.57
		3	28.39
2	Salt2-Actin-6h	1	27.91	27.87	27.95
		2	27.94
		3	27.76
3	Salt3-Actin-6h	1	27.58	27.54	27.95
		2	27.59
		3	27.45
1	Salt1-Actin-9h	1	28.59	28.54	28.51
		2	28.53
		3	28.5
2	Salt2-Actin-9h	1	28.12	28.22	28.51
		2	28.28
		3	28.26
3	Salt3-Actin-9h	1	28.76	28.76	28.51
		2	28.71
		3	28.81
1	Salt1-Actin-12h	1	29.11	29.06	28.92
		2	29.05
		3	29.02
2	Salt2-Actin-12h	1	28.74	28.84	28.92
		2	28.94
		3	28.84
3	Salt3-Actin-12h	1	28.85	28.85	28.92
		2	28.84
		3	28.86
1	Salt1-Actin-24h	1	28.66	28.7	28.64
		2	28.61
		3	28.83
2	Salt2-Actin-24h	1	28.52	28.63	28.64
		2	28.61
		3	28.76
3	Salt3-Actin-24h	1	28.52	28.6	28.64
		2	28.56
		3	28.72
1	Salt1-Actin-48h	1	28.06	28.11	27.62
		2	28.19
		3	28.08
2	Salt2-Actin-48h	1	26.77	26.73	27.62
		2	26.66
		3	26.76
3	Salt3-Actin-48h	1	28.11	28.02	27.62
		2	27.94
		3	28.01
1	Salt1-OsSC32-1h	1	32.29	32.18		4.46	0.0454366
		2	32.11
		3	32.14
2	Salt2-OsSC32-1h	1	31.9	31.84		4.12	0.0575117
		2	31.81
		3	31.81
3	Salt3-OsSC32-1h	1	31.39	31.42		3.7	0.0769465
		2	31.51
		3	31.36
1	Salt1-OsSC32-2h	1	31.77	31.78		3.59	0.0830429
		2	31.79
		3	31.78
2	Salt2-OsSC32-2h	1	32.12	32.05		3.86	0.0688691
		2	31.95
		3	32.08
3	Salt3-OsSC32-2h	1	31.78	31.74		3.55	0.0853775
		2	31.65
		3	31.79
1	Salt1-OsSC32-4h	1	31.21	31.16		3.21	0.108067
		2	31.15
		3	31.12
2	Salt2-OsSC32-4h	1	31.34	31.43		3.48	0.0896222
		2	31.52
		3	31.43
3	Salt3-OsSC32-4h	1	30.67	30.57		2.62	0.162668
		2	30.49
		3	30.55
1	Salt1-OsSC32-6h	1	32.01	32.01		4.06	0.059954
		2	32.11
		3	31.91
2	Salt2-OsSC32-6h	1	31.55	31.55		3.6	0.0824692
		2	31.52
		3	31.58
3	Salt3-OsSC32-6h	1	31.64	31.73		3.78	0.0727958
		2	31.74
		3	31.81
1	Salt1-OsSC32-9h	1	31.99	31.99		3.48	0.0896222
		2	31.91
		3	32.07
2	Salt2-OsSC32-9h	1	30.87	30.94		2.43	0.185565
		2	31.05
		3	30.9
3	Salt3-OsSC32-9h	1	31.68	31.64		3.13	0.114229
		2	31.7
		3	31.54
1	Salt1-OsSC32-12h	1	32.5	32.41		3.49	0.0890031
		2	32.32
		3	32.41
2	Salt2-OsSC32-12h	1	31.63	31.58		2.66	0.15822
		2	31.58
		3	31.53
3	Salt3-OsSC32-12h	1	31.96	32.03		3.11	0.115824
		2	32.08
		3	32.05
1	Salt1-OsSC32-24h	1	31.42	31.45		2.81	0.142595
		2	31.56
		3	31.37
2	Salt2-OsSC32-24h	1	32.07	32.08		3.44	0.0921418
		2	31.98
		3	32.19
3	Salt3-OsSC32-24h	1	31.87	31.88		3.24	0.105843
		2	31.78
		3	31.99
1	Salt1-OsSC32-48h	1	31.84	31.85		4.23	0.0532897
		2	31.75
		3	31.96
2	Salt2-OsSC32-48h	1	31.62	31.64		4.02	0.0616395
		2	31.76
		3	31.54
3	Salt3-OsSC32-48h	1	31.7	31.78		4.16	0.0559391
		2	31.75
		3	31.89

## Sheet: OsSC34
qRT-PCR raw data for salt treatment of OsSC34
Biological replicates	Sample Name	Technical replicates	Cq	Cq Mean (Technical replicates)	Cq Mean (Biological replicates)	ΔCq	2-ΔCq
1	Salt1-Actin-1h	1	25.63	25.69	25.64
		2	25.63
		3	25.81
2	Salt2-Actin-1h	1	25.71	25.63	25.64
		2	25.66
		3	25.52
3	Salt3-Actin-1h	1	25.53	25.61	25.64
		2	25.58
		3	25.72
1	Salt1-Actin-2h	1	26.47	26.49	26.35
		2	26.59
		3	26.41
2	Salt2-Actin-2h	1	26.33	26.28	26.35
		2	26.34
		3	26.17
3	Salt3-Actin-2h	1	26.2	26.28	26.35
		2	26.4
		3	26.24
1	Salt1-Actin-4h	1	26.32	26.26	26.23
		2	26.19
		3	26.27
2	Salt2-Actin-4h	1	26.03	26.13	26.23
		2	26.23
		3	26.13
3	Salt3-Actin-4h	1	26.23	26.29	26.23
		2	26.38
		3	26.26
1	Salt1-Actin-6h	1	26.19	26.24	26.18
		2	26.2
		3	26.33
2	Salt2-Actin-6h	1	26.15	26.1	26.18
		2	26.14
		3	26.01
3	Salt3-Actin-6h	1	26.12	26.21	26.18
		2	26.3
		3	26.21
1	Salt1-Actin-9h	1	26.98	27.07	27.05
		2	27.2
		3	27.03
2	Salt2-Actin-9h	1	27.08	27.03	27.05
		2	27.07
		3	26.94
3	Salt3-Actin-9h	1	27.04	27.05	27.05
		2	27.09
		3	27.02
1	Salt1-Actin-12h	1	26.69	26.69	26.6
		2	26.8
		3	26.58
2	Salt2-Actin-12h	1	26.67	26.6	26.6
		2	26.55
		3	26.58
3	Salt3-Actin-12h	1	26.58	26.5	26.6
		2	26.49
		3	26.43
1	Salt1-Actin-24h	1	26.78	26.77	26.94
		2	26.68
		3	26.85
2	Salt2-Actin-24h	1	26.94	26.93	26.94
		2	26.92
		3	26.93
3	Salt3-Actin-24h	1	27.13	27.12	26.94
		2	27.22
		3	27.01
1	Salt1-Actin-48h	1	27.08	27.11
		2	27.11
		3	27.14
2	Salt2-Actin-48h	1	26.87	26.88
		2	26.82
		3	26.95
3	Salt3-Actin-48h	1	26.92	26.91
		2	26.8
		3	27.01
1	Salt1-OsSC34-1h	1	26.59	26.65		1.00667	0.497695
		2	26.78
		3	26.58
2	Salt2-OsSC34-1h	1	26.63	26.56		0.916667	0.529732
		2	26.46
		3	26.59
3	Salt3-OsSC34-1h	1	26.54	26.49		0.846667	0.556068
		2	26.52
		3	26.41
1	Salt1-OsSC34-2h	1	26.25	26.25		-0.1	1.07177
		2	26.27
		3	26.23
2	Salt2-OsSC34-2h	1	26.17	26.27		-0.08	1.05702
		2	26.31
		3	26.33
3	Salt3-OsSC34-2h	1	26.2	26.17		-0.18	1.13288
		2	26.09
		3	26.22
1	Salt1-OsSC34-4h	1	24.87	24.91		-1.31667	2.4909
		2	25
		3	24.86
2	Salt2-OsSC34-4h	1	24.38	24.45		-1.77667	3.42634
		2	24.43
		3	24.54
3	Salt3-OsSC34-4h	1	25.32	25.4		-0.826667	1.77358
		2	25.47
		3	25.41
1	Salt1-OsSC34-6h	1	25	24.92		-1.26333	2.4005
		2	24.92
		3	24.84
2	Salt2-OsSC34-6h	1	24.96	24.94		-1.24333	2.36745
		2	24.96
		3	24.9
3	Salt3-OsSC34-6h	1	24.89	24.84		-1.34333	2.53737
		2	24.82
		3	24.81
1	Salt1-OsSC34-9h	1	25.38	25.36		-1.69	3.22657
		2	25.42
		3	25.28
2	Salt2-OsSC34-9h	1	25.3	25.31		-1.74	3.34035
		2	25.41
		3	25.22
3	Salt3-OsSC34-9h	1	25.22	25.24		-1.81	3.50642
		2	25.15
		3	25.35
1	Salt1-OsSC34-12h	1	25.96	25.86		-0.736667	1.66632
		2	25.75
		3	25.87
2	Salt2-OsSC34-12h	1	25.7	25.8		-0.796667	1.73708
		2	25.92
		3	25.78
3	Salt3-OsSC34-12h	1	25.7	25.71		-0.886667	1.8489
		2	25.76
		3	25.67
1	Salt1-OsSC34-24h	1	25.94	25.94		-1	2
		2	26.04
		3	25.84
2	Salt2-OsSC34-24h	1	26.11	26.05		-0.89	1.85318
		2	26.16
		3	25.96
3	Salt3-OsSC34-24h	1	26.19	26.21		-0.73	1.65864
		2	26.32
		3	26.12
1	Salt1-OsSC34-48h	1	27.13	27.15		0.183333	0.880666
		2	27.26
		3	27.06
2	Salt2-OsSC34-48h	1	27.14	27.18		0.213333	0.862542
		2	27.16
		3	27.24
3	Salt3-OsSC34-48h	1	26.89	26.9		-0.0666667	1.04729
		2	26.97
		3	26.84

## Sheet: OsSC25
qRT-PCR raw data for salt treatment of OsSC25
Biological replicates	Sample Name	Technical replicates	Cq	Cq Mean (Technical replicates)	Cq Mean (Biological replicates)	ΔCq	2-ΔCq
1	Salt1-Actin-1h	1	27.65	27.59	27.72
		2	27.56
		3	27.56
2	Salt2-Actin-1h	1	27.81	27.75	27.72
		2	27.74
		3	27.82
3	Salt3-Actin-1h	1	27.88	27.82	27.72
		2	27.83
		3	27.75
1	Salt1-Actin-2h	1	28.32	28.29	28.19
		2	28.37
		3	28.18
2	Salt2-Actin-2h	1	28.18	28.1	28.19
		2	28.08
		3	28.04
3	Salt3-Actin-2h	1	28.19	28.18	28.19
		2	28.12
		3	28.23
1	Salt1-Actin-4h	1	27.38	27.48	27.95
		2	27.57
		3	27.49
2	Salt2-Actin-4h	1	28.33	28.31	27.95
		2	28.26
		3	28.34
3	Salt3-Actin-4h	1	27.95	28.06	27.95
		2	28.19
		3	28.04
1	Salt1-Actin-6h	1	28.49	28.45	27.95
		2	28.52
		3	28.34
2	Salt2-Actin-6h	1	28	27.87	27.95
		2	27.81
		3	27.8
3	Salt3-Actin-6h	1	27.54	27.54	27.95
		2	27.62
		3	27.46
1	Salt1-Actin-9h	1	28.58	28.54	28.51
		2	28.49
		3	28.55
2	Salt2-Actin-9h	1	28.11	28.22	28.51
		2	28.24
		3	28.31
3	Salt3-Actin-9h	1	28.65	28.76	28.51
		2	28.75
		3	28.88
1	Salt1-Actin-12h	1	29.16	29.06	28.92
		2	28.95
		3	29.07
2	Salt2-Actin-12h	1	28.79	28.84	28.92
		2	28.79
		3	28.94
3	Salt3-Actin-12h	1	28.91	28.85	28.92
		2	28.76
		3	28.88
1	Salt1-Actin-24h	1	28.66	28.7	28.64
		2	28.61
		3	28.83
2	Salt2-Actin-24h	1	28.54	28.63	28.64
		2	28.67
		3	28.68
3	Salt3-Actin-24h	1	28.55	28.6	28.64
		2	28.66
		3	28.59
1	Salt1-Actin-48h	1	28.12	28.11	27.62
		2	28.18
		3	28.03
2	Salt2-Actin-48h	1	26.83	26.73	27.62
		2	26.71
		3	26.65
3	Salt3-Actin-48h	1	28.15	28.02	27.62
		2	27.94
		3	27.97
1	Salt1-OsSC25-1h	1	34.33	34.36		6.64	0.0100268
		2	34.26
		3	34.49
2	Salt2-OsSC25-1h	1	34	33.89		6.17	0.0138882
		2	33.79
		3	33.88
3	Salt3-OsSC25-1h	1	33.77	33.84		6.12	0.0143779
		2	33.95
		3	33.8
1	Salt1-OsSC25-2h	1	34.01	34.02		5.83	0.017579
		2	33.94
		3	34.11
2	Salt2-OsSC25-2h	1	33.66	33.74		5.55	0.0213444
		2	33.81
		3	33.75
3	Salt3-OsSC25-2h	1	34.01	33.97		5.78	0.018199
		2	33.9
		3	34
1	Salt1-OsSC25-4h	1	32.85	32.85		4.9	0.0334929
		2	32.89
		3	32.81
2	Salt2-OsSC25-4h	1	33.34	33.29		5.34	0.0246888
		2	33.27
		3	33.26
3	Salt3-OsSC25-4h	1	33.02	32.94		4.99	0.0314674
		2	32.95
		3	32.85
1	Salt1-OsSC25-6h	1	33.54	33.45		5.5	0.0220971
		2	33.46
		3	33.35
2	Salt2-OsSC25-6h	1	33.65	33.59		5.64	0.0200535
		2	33.6
		3	33.52
3	Salt3-OsSC25-6h	1	33.53	33.57		5.62	0.0203335
		2	33.57
		3	33.61
1	Salt1-OsSC25-9h	1	34.04	34.03		5.52	0.0217929
		2	33.93
		3	34.12
2	Salt2-OsSC25-9h	1	34.05	34.09		5.58	0.0209051
		2	34
		3	34.22
3	Salt3-OsSC25-9h	1	34.14	34.13		5.62	0.0203335
		2	34.22
		3	34.03
1	Salt1-OsSC25-12h	1	34.33	34.23		5.31	0.0252076
		2	34.17
		3	34.19
2	Salt2-OsSC25-12h	1	34.58	34.58		5.66	0.0197774
		2	34.49
		3	34.67
3	Salt3-OsSC25-12h	1	34.7	34.74		5.82	0.0177013
		2	34.72
		3	34.8
1	Salt1-OsSC25-24h	1	34.4	34.48		5.84	0.0174576
		2	34.59
		3	34.45
2	Salt2-OsSC25-24h	1	34.73	34.6		5.96	0.0160643
		2	34.63
		3	34.62
3	Salt3-OsSC25-24h	1	34.34	34.41		5.77	0.0183255
		2	34.37
		3	34.52
1	Salt1-OsSC25-48h	1	32.9	32.97		5.35	0.0245183
		2	32.93
		3	33.08
2	Salt2-OsSC25-48h	1	33.42	33.46		5.84	0.0174576
		2	33.53
		3	33.43
3	Salt3-OsSC25-48h	1	33.37	33.33		5.71	0.0191038
		2	33.38
		3	33.24	1h		0.0138882	0.0143779

## Sheet: OsSR45a
qRT-PCR raw data for salt treatment of OsSR45a
Biological replicates	Sample Name	Technical replicates	Cq	Cq Mean (Technical replicates)	Cq Mean (Biological replicates)	ΔCq	2-ΔCq
1	Salt1-Actin-1h	1	27.5	27.59	27.72
		2	27.7
		3	27.57
2	Salt2-Actin-1h	1	27.66	27.75	27.72
		2	27.83
		3	27.76
3	Salt3-Actin-1h	1	27.91	27.82	27.72
		2	27.74
		3	27.81
1	Salt1-Actin-2h	1	28.28	28.29	28.19
		2	28.3
		3	28.29
2	Salt2-Actin-2h	1	28.12	28.1	28.19
		2	28.17
		3	28.01
3	Salt3-Actin-2h	1	28.16	28.18	28.19
		2	28.07
		3	28.31
1	Salt1-Actin-4h	1	27.54	27.48	27.95
		2	27.4
		3	27.5
2	Salt2-Actin-4h	1	28.31	28.31	27.95
		2	28.27
		3	28.35
3	Salt3-Actin-4h	1	27.96	28.06	27.95
		2	28.11
		3	28.11
1	Salt1-Actin-6h	1	28.36	28.45	27.95
		2	28.42
		3	28.57
2	Salt2-Actin-6h	1	27.95	27.87	27.95
		2	27.89
		3	27.77
3	Salt3-Actin-6h	1	27.54	27.54	27.95
		2	27.58
		3	27.5
1	Salt1-Actin-9h	1	28.43	28.54	28.51
		2	28.62
		3	28.57
2	Salt2-Actin-9h	1	28.15	28.22	28.51
		2	28.29
		3	28.22
3	Salt3-Actin-9h	1	28.73	28.76	28.51
		2	28.76
		3	28.79
1	Salt1-Actin-12h	1	28.98	29.06	28.92
		2	29.12
		3	29.08
2	Salt2-Actin-12h	1	28.86	28.84	28.92
		2	28.89
		3	28.77
3	Salt3-Actin-12h	1	28.79	28.85	28.92
		2	28.94
		3	28.82
1	Salt1-Actin-24h	1	28.61	28.7	28.64
		2	28.71
		3	28.78
2	Salt2-Actin-24h	1	28.59	28.63	28.64
		2	28.54
		3	28.76
3	Salt3-Actin-24h	1	28.67	28.6	28.64
		2	28.58
		3	28.55
1	Salt1-Actin-48h	1	28.19	28.11	27.62
		2	28.11
		3	28.03
2	Salt2-Actin-48h	1	26.65	26.73	27.62
		2	26.73
		3	26.81
3	Salt3-Actin-48h	1	28.07	28.02	27.62
		2	27.98
		3	28.01
1	Salt1-OsSR45a-1h	1	27.94	27.88		0.16	0.895025
		2	27.91
		3	27.79
2	Salt2-OsSR45a-1h	1	27.39	27.44		-0.28	1.21419
		2	27.39
		3	27.54
3	Salt3-OsSR45a-1h	1	27.07	27.17		-0.55	1.46409
		2	27.26
		3	27.18
1	Salt1-OsSR45a-2h	1	27.49	27.49		-0.7	1.6245
		2	27.47
		3	27.51
2	Salt2-OsSR45a-2h	1	27.9	27.95		-0.24	1.18099
		2	28.07
		3	27.88
3	Salt3-OsSR45a-2h	1	28.56	28.56		0.37	0.773782
		2	28.5
		3	28.62
1	Salt1-OsSR45a-4h	1	28.22	28.28		0.33	0.795536
		2	28.37
		3	28.25
2	Salt2-OsSR45a-4h	1	28.21	28.3		0.35	0.784584
		2	28.3
		3	28.39
3	Salt3-OsSR45a-4h	1	27.67	27.68		-0.27	1.20581
		2	27.67
		3	27.7
1	Salt1-OsSR45a-6h	1	27.61	27.59		-0.36	1.28343
		2	27.61
		3	27.55
2	Salt2-OsSR45a-6h	1	27.8	27.69		-0.26	1.19748
		2	27.67
		3	27.6
3	Salt3-OsSR45a-6h	1	28.54	28.42		0.47	0.721965
		2	28.35
		3	28.37
1	Salt1-OsSR45a-9h	1	28.42	28.4		-0.11	1.07923
		2	28.46
		3	28.32
2	Salt2-OsSR45a-9h	1	27.89	27.79		-0.72	1.64718
		2	27.7
		3	27.78
3	Salt3-OsSR45a-9h	1	28.19	28.14		-0.37	1.29235
		2	28.12
		3	28.11
1	Salt1-OsSR45a-12h	1	27.95	28.01		-0.91	1.87905
		2	28.03
		3	28.05
2	Salt2-OsSR45a-12h	1	27.78	27.85		-1.07	2.09943
		2	27.8
		3	27.97
3	Salt3-OsSR45a-12h	1	28.22	28.09		-0.83	1.77769
		2	28.01
		3	28.04
1	Salt1-OsSR45a-24h	1	27.87	27.76		-0.88	1.84038
		2	27.67
		3	27.74
2	Salt2-OsSR45a-24h	1	27.51	27.59		-1.05	2.07053
		2	27.6
		3	27.66
3	Salt3-OsSR45a-24h	1	27.68	27.76		-0.88	1.84038
		2	27.77
		3	27.83
1	Salt1-OsSR45a-48h	1	27.69	27.77		0.15	0.90125
		2	27.78
		3	27.84
2	Salt2-OsSR45a-48h	1	27.61	27.65		0.03	0.97942
		2	27.58
		3	27.76
3	Salt3-OsSR45a-48h	1	27.92	27.87		0.25	0.840896
		2	27.89
		3	27.8	1h		1.21419	1.46409

[truncated: 14 more sheets: OsSR45, OsRS2Z39, OsRS2Z37, OsRS2Z36, OsRS2Z38, OsRSZ21a, OsRSZ21, OsRSZ23, OsRS29, OsRS33, OsSR33, OsSR32, OsSR33a, OsSR40]
