# Supplementary material for: Comprehensive study of serine/arginine-rich (SR) gene family in rice: characterization, evolution and expression analysis
Source: PeerJ journal article supplement (doi:10.7717/peerj.16193), 2023-10-13
Supplement: qRTPCR_raw_dataTableS9S16.zip [file Supplemental Table_S12.xlsx]

## Sheet: OsSCL30a
qRT-PCR raw data for drought treatment of OsSCL30a
Biological replicates	Sample Name	Technical replicates	Cq	Cq Mean (Technical replicates)	Cq Mean (Biological replicates)	ΔCq	2-ΔCq
1	Drought1-Actin-1h	1	23.44	23.51	23.57
		2	23.45
		3	23.64
2	Drought2-Actin-1h	1	23.84	23.75	23.57
		2	23.77
		3	23.64
3	Drought3-Actin-1h	1	23.36	23.45	23.57
		2	23.43
		3	23.56
1	Drought1-Actin-2h	1	23.5	23.49	23.54
		2	23.39
		3	23.58
2	Drought2-Actin-2h	1	23.5	23.55	23.54
		2	23.55
		3	23.6
3	Drought3-Actin-2h	1	23.64	23.58	23.54
		2	23.63
		3	23.47
1	Drought1-Actin-4h	1	24.41	24.5	24.66
		2	24.54
		3	24.55
2	Drought2-Actin-4h	1	24.81	24.87	24.66
		2	24.82
		3	24.98
3	Drought3-Actin-4h	1	24.58	24.61	24.66
		2	24.58
		3	24.67
1	Drought1-Actin-6h	1	24.42	24.5	24.18
		2	24.46
		3	24.62
2	Drought2-Actin-6h	1	23.92	23.86	24.18
		2	23.9
		3	23.76
3	Drought3-Actin-6h	1	24.17	24.18	24.18
		2	24.19
		3	24.18
1	Drought1-Actin-9h	1	26.1	26.19	26.3
		2	26.29
		3	26.18
2	Drought2-Actin-9h	1	26.25	26.33	26.3
		2	26.32
		3	26.42
3	Drought3-Actin-9h	1	26.3	26.38	26.3
		2	26.41
		3	26.43
1	Drought1-Actin-12h	1	26.27	26.29	26.22
		2	26.38
		3	26.22
2	Drought2-Actin-12h	1	26.19	26.15	26.22
		2	26.16
		3	26.1
3	Drought3-Actin-12h	1	26.19	26.21	26.22
		2	26.22
		3	26.22
1	Drought1-Actin-24h	1	25.9	25.97	25.89
		2	25.93
		3	26.08
2	Drought2-Actin-24h	1	25.67	25.72	25.89
		2	25.67
		3	25.82
3	Drought3-Actin-24h	1	26.01	25.98	25.89
		2	26.02
		3	25.91
1	Drought1-Actin-48h	1	26.95	26.97	26.89
		2	26.94
		3	27.02
2	Drought2-Actin-48h	1	26.78	26.89	26.89
		2	27.02
		3	26.87
3	Drought3-Actin-48h	1	26.88	26.8	26.89
		2	26.79
		3	26.73
1	Drought1-OsSCL30a-1h	1	24.82	24.81		1.24	0.423373
		2	24.74
		3	24.87
2	Drought2-OsSCL30a-1h	1	24.41	24.44		0.87	0.547147
		2	24.36
		3	24.55
3	Drought3-OsSCL30a-1h	1	24.52	24.43		0.86	0.550953
		2	24.32
		3	24.45
1	Drought1-OsSCL30a-2h	1	25.86	25.82		2.28	0.205898
		2	25.76
		3	25.84
2	Drought2-OsSCL30a-2h	1	25.94	25.92		2.38	0.192109
		2	26.01
		3	25.81
3	Drought3-OsSCL30a-2h	1	25.87	25.84		2.3	0.203063
		2	25.84
		3	25.81
1	Drought1-OsSCL30a-4h	1	25.69	25.71		1.05	0.482968
		2	25.71
		3	25.73
2	Drought2-OsSCL30a-4h	1	25.67	25.7		1.04	0.486327
		2	25.71
		3	25.72
3	Drought3-OsSCL30a-4h	1	25.75	25.77		1.11	0.463294
		2	25.88
		3	25.68
1	Drought1-OsSCL30a-6h	1	26.85	26.75		2.57	0.168404
		2	26.76
		3	26.64
2	Drought2-OsSCL30a-6h	1	26.73	26.79		2.61	0.163799
		2	26.91
		3	26.73
3	Drought3-OsSCL30a-6h	1	27.48	27.49		3.31	0.10083
		2	27.4
		3	27.59
1	Drought1-OsSCL30a-9h	1	31.81	31.73		5.43	0.0231957
		2	31.71
		3	31.67
2	Drought2-OsSCL30a-9h	1	31.69	31.67		5.37	0.0241807
		2	31.62
		3	31.7
3	Drought3-OsSCL30a-9h	1	31.78	31.7		5.4	0.0236831
		2	31.59
		3	31.73
1	Drought1-OsSCL30a-12h	1	31.52	31.54		5.32	0.0250334
		2	31.62
		3	31.48
2	Drought2-OsSCL30a-12h	1	31.13	31.17		4.95	0.032352
		2	31.1
		3	31.28
3	Drought3-OsSCL30a-12h	1	31.19	31.22		5	0.03125
		2	31.17
		3	31.3
1	Drought1-OsSCL30a-24h	1	31.42	31.38		5.49	0.0222508
		2	31.3
		3	31.42
2	Drought2-OsSCL30a-24h	1	31.16	31.25		5.36	0.0243489
		2	31.17
		3	31.14
3	Drought3-OsSCL30a-24h	1	31.03	31.14		5.25	0.026278
		2	31.2
		3	31.19
1	Drought1-OsSCL30a-48h	1	31.19	31.3		4.41	0.047039
		2	31.36
		3	31.35
2	Drought2-OsSCL30a-48h	1	31.61	31.67		4.78	0.0363979
		2	31.73
		3	31.67
3	Drought3-OsSCL30a-48h	1	31.17	31.28		4.39	0.0476956
		2	31.26
		3	31.41

## Sheet: OsSCL30
qRT-PCR raw data for drought treatment of OsSCL30
Biological replicates	Sample Name	Technical replicates	Cq	Cq Mean (Technical replicates)	Cq Mean (Biological replicates)	ΔCq	2-ΔCq
1	Drought1-Actin-1h	1	23.53	23.51	23.57
		2	23.48
		3	23.52
2	Drought2-Actin-1h	1	23.83	23.75	23.57
		2	23.65
		3	23.77
3	Drought3-Actin-1h	1	23.37	23.45	23.57
		2	23.55
		3	23.43
1	Drought1-Actin-2h	1	23.55	23.49	23.54
		2	23.43
		3	23.49
2	Drought2-Actin-2h	1	23.53	23.55	23.54
		2	23.46
		3	23.66
3	Drought3-Actin-2h	1	23.62	23.58	23.54
		2	23.59
		3	23.53
1	Drought1-Actin-4h	1	24.42	24.5	24.66
		2	24.57
		3	24.51
2	Drought2-Actin-4h	1	24.9	24.87	24.66
		2	24.81
		3	24.9
3	Drought3-Actin-4h	1	24.65	24.61	24.66
		2	24.56
		3	24.62
1	Drought1-Actin-6h	1	24.53	24.5	24.18
		2	24.53
		3	24.44
2	Drought2-Actin-6h	1	23.84	23.86	24.18
		2	23.8
		3	23.94
3	Drought3-Actin-6h	1	24.2	24.18	24.18
		2	24.07
		3	24.27
1	Drought1-Actin-9h	1	26.21	26.19	26.3
		2	26.14
		3	26.22
2	Drought2-Actin-9h	1	26.42	26.33	26.3
		2	26.24
		3	26.33
3	Drought3-Actin-9h	1	26.32	26.38	26.3
		2	26.39
		3	26.43
1	Drought1-Actin-12h	1	26.35	26.29	26.22
		2	26.32
		3	26.2
2	Drought2-Actin-12h	1	26.26	26.15	26.22
		2	26.07
		3	26.12
3	Drought3-Actin-12h	1	26.32	26.21	26.22
		2	26.12
		3	26.19
1	Drought1-Actin-24h	1	25.9	25.97	25.89
		2	26.07
		3	25.94
2	Drought2-Actin-24h	1	25.63	25.72	25.89
		2	25.73
		3	25.8
3	Drought3-Actin-24h	1	25.99	25.98	25.89
		2	25.93
		3	26.02
1	Drought1-Actin-48h	1	26.9	26.97	26.89
		2	26.98
		3	27.03
2	Drought2-Actin-48h	1	26.84	26.89	26.89
		2	27.02
		3	26.81
3	Drought3-Actin-48h	1	26.72	26.8	26.89
		2	26.84
		3	26.84
1	Drought1-OsSCL30-1h	1	29	28.89		5.32	0.0250334
		2	28.84
		3	28.83
2	Drought2-OsSCL30-1h	1	28.76	28.86		5.29	0.0255594
		2	28.95
		3	28.87
3	Drought3-OsSCL30-1h	1	29.05	28.92		5.35	0.0245183
		2	28.86
		3	28.85
1	Drought1-OsSCL30-2h	1	28.6	28.57		5.03	0.0306069
		2	28.52
		3	28.59
2	Drought2-OsSCL30-2h	1	28.59	28.62		5.08	0.0295643
		2	28.67
		3	28.6
3	Drought3-OsSCL30-2h	1	28.57	28.44		4.9	0.0334929
		2	28.41
		3	28.34
1	Drought1-OsSCL30-4h	1	29.03	29.03		4.37	0.0483614
		2	29.01
		3	29.05
2	Drought2-OsSCL30-4h	1	29.52	29.59		4.93	0.0328036
		2	29.68
		3	29.57
3	Drought3-OsSCL30-4h	1	29.81	29.81		5.15	0.0281641
		2	29.83
		3	29.79
1	Drought1-OsSCL30-6h	1	28.68	28.67		4.49	0.0445016
		2	28.64
		3	28.69
2	Drought2-OsSCL30-6h	1	28.85	28.78		4.6	0.0412346
		2	28.73
		3	28.76
3	Drought3-OsSCL30-6h	1	28.66	28.67		4.49	0.0445016
		2	28.65
		3	28.7
1	Drought1-OsSCL30-9h	1	29.08	29.15		2.85	0.138696
		2	29.15
		3	29.22
2	Drought2-OsSCL30-9h	1	29.25	29.29		2.99	0.125869
		2	29.22
		3	29.4
3	Drought3-OsSCL30-9h	1	29.3	29.38		3.08	0.118257
		2	29.41
		3	29.43
1	Drought1-OsSCL30-12h	1	29.31	29.35		3.13	0.114229
		2	29.29
		3	29.45
2	Drought2-OsSCL30-12h	1	29.12	29.22		3	0.125
		2	29.23
		3	29.31
3	Drought3-OsSCL30-12h	1	29.21	29.09		2.87	0.136787
		2	29.02
		3	29.04
1	Drought1-OsSCL30-24h	1	28.46	28.44		2.55	0.170755
		2	28.46
		3	28.4
2	Drought2-OsSCL30-24h	1	28.83	28.75		2.86	0.137738
		2	28.72
		3	28.76
3	Drought3-OsSCL30-24h	1	28.54	28.54		2.65	0.15932
		2	28.53
		3	28.55
1	Drought1-OsSCL30-48h	1	29.56	29.56		2.67	0.157127
		2	29.55
		3	29.57
2	Drought2-OsSCL30-48h	1	29.29	29.33		2.44	0.184284
		2	29.44
		3	29.26
3	Drought3-OsSCL30-48h	1	29.29	29.22		2.33	0.198884
		2	29.26
		3	29.11

## Sheet: OsSCL57
qRT-PCR raw data for drought treatment of OsSCL57
Biological replicates	Sample Name	Technical replicates	Cq	Cq Mean (Technical replicates)	Cq Mean (Biological replicates)	ΔCq	2-ΔCq
1	Drought1-Actin-1h	1	23.5	23.51	23.57
		2	23.61
		3	23.42
2	Drought2-Actin-1h	1	23.86	23.75	23.57
		2	23.84
		3	23.63
3	Drought3-Actin-1h	1	23.42	23.45	23.57
		2	23.36
		3	23.57
1	Drought1-Actin-2h	1	23.49	23.49	23.54
		2	23.6
		3	23.38
2	Drought2-Actin-2h	1	23.46	23.55	23.54
		2	23.51
		3	23.68
3	Drought3-Actin-2h	1	23.69	23.58	23.54
		2	23.47
		3	23.58
1	Drought1-Actin-4h	1	24.4	24.5	24.66
		2	24.5
		3	24.6
2	Drought2-Actin-4h	1	24.92	24.87	24.66
		2	24.9
		3	24.79
3	Drought3-Actin-4h	1	24.5	24.61	24.66
		2	24.65
		3	24.68
1	Drought1-Actin-6h	1	24.49	24.5	24.18
		2	24.46
		3	24.55
2	Drought2-Actin-6h	1	23.88	23.86	24.18
		2	23.91
		3	23.79
3	Drought3-Actin-6h	1	24.12	24.18	24.18
		2	24.25
		3	24.17
1	Drought1-Actin-9h	1	26.09	26.19	26.3
		2	26.28
		3	26.2
2	Drought2-Actin-9h	1	26.29	26.33	26.3
		2	26.44
		3	26.26
3	Drought3-Actin-9h	1	26.28	26.38	26.3
		2	26.43
		3	26.43
1	Drought1-Actin-12h	1	26.34	26.29	26.22
		2	26.22
		3	26.31
2	Drought2-Actin-12h	1	26.08	26.15	26.22
		2	26.13
		3	26.24
3	Drought3-Actin-12h	1	26.3	26.21	26.22
		2	26.15
		3	26.18
1	Drought1-Actin-24h	1	26.08	25.97	25.89
		2	25.9
		3	25.93
2	Drought2-Actin-24h	1	25.62	25.72	25.89
		2	25.8
		3	25.74
3	Drought3-Actin-24h	1	25.9	25.98	25.89
		2	26.01
		3	26.03
1	Drought1-Actin-48h	1	26.88	26.97	26.89
		2	27.05
		3	26.98
2	Drought2-Actin-48h	1	26.95	26.89	26.89
		2	26.83
		3	26.89
3	Drought3-Actin-48h	1	26.79	26.8	26.89
		2	26.75
		3	26.86
1	Drought1-OsSCL57-1h	1	26.66	26.72		3.15	0.112656
		2	26.79
		3	26.71
2	Drought2-OsSCL57-1h	1	26.63	26.58		3.01	0.124137
		2	26.56
		3	26.55
3	Drought3-OsSCL57-1h	1	26.78	26.76		3.19	0.109576
		2	26.85
		3	26.65
1	Drought1-OsSCL57-2h	1	26.36	26.28		2.74	0.149685
		2	26.22
		3	26.26
2	Drought2-OsSCL57-2h	1	25.77	25.79		2.25	0.210224
		2	25.8
		3	25.8
3	Drought3-OsSCL57-2h	1	25.79	25.74		2.2	0.217638
		2	25.71
		3	25.72
1	Drought1-OsSCL57-4h	1	26	26.03		1.37	0.386891
		2	26.12
		3	25.97
2	Drought2-OsSCL57-4h	1	26.4	26.45		1.79	0.289172
		2	26.48
		3	26.47
3	Drought3-OsSCL57-4h	1	25.73	25.75		1.09	0.469761
		2	25.86
		3	25.66
1	Drought1-OsSCL57-6h	1	25.85	25.85		1.67	0.314253
		2	25.81
		3	25.89
2	Drought2-OsSCL57-6h	1	25.63	25.63		1.45	0.366021
		2	25.72
		3	25.54
3	Drought3-OsSCL57-6h	1	25.81	25.79		1.61	0.327598
		2	25.74
		3	25.82
1	Drought1-OsSCL57-9h	1	26.61	26.7		0.4	0.757858
		2	26.78
		3	26.71
2	Drought2-OsSCL57-9h	1	26.94	27.03		0.73	0.602904
		2	27.12
		3	27.03
3	Drought3-OsSCL57-9h	1	26.7	26.74		0.44	0.737135
		2	26.69
		3	26.83
1	Drought1-OsSCL57-12h	1	27.03	27.04		0.82	0.566442
		2	27.12
		3	26.97
2	Drought2-OsSCL57-12h	1	27.48	27.54		1.32	0.400535
		2	27.66
		3	27.48
3	Drought3-OsSCL57-12h	1	27.12	27.19		0.97	0.510506
		2	27.14
		3	27.31
1	Drought1-OsSCL57-24h	1	26.81	26.78		0.89	0.539614
		2	26.86
		3	26.67
2	Drought2-OsSCL57-24h	1	26.64	26.51		0.62	0.650671
		2	26.52
		3	26.53
3	Drought3-OsSCL57-24h	1	26.9	26.79		0.9	0.535887
		2	26.71
		3	26.76
1	Drought1-OsSCL57-48h	1	28.69	28.58		1.69	0.309927
		2	28.5
		3	28.55
2	Drought2-OsSCL57-48h	1	29.18	29.08		2.19	0.219151
		2	29.05
		3	29.01
3	Drought3-OsSCL57-48h	1	28.56	28.66		1.77	0.293209
		2	28.74
		3	28.68

## Sheet: OsSCL28
qRT-PCR raw data for drought treatment of OsSCL28
Biological replicates	Sample Name	Technical replicates	Cq	Cq Mean (Technical replicates)	Cq Mean (Biological replicates)	ΔCq	2-ΔCq
1	Drought1-Actin-1h	1	23.52	23.51	23.57
		2	23.59
		3	23.42
2	Drought2-Actin-1h	1	23.82	23.75	23.57
		2	23.8
		3	23.63
3	Drought3-Actin-1h	1	23.38	23.45	23.57
		2	23.4
		3	23.57
1	Drought1-Actin-2h	1	23.4	23.49	23.54
		2	23.49
		3	23.58
2	Drought2-Actin-2h	1	23.53	23.55	23.54
		2	23.59
		3	23.53
3	Drought3-Actin-2h	1	23.7	23.58	23.54
		2	23.51
		3	23.53
1	Drought1-Actin-4h	1	24.6	24.5	24.66
		2	24.39
		3	24.51
2	Drought2-Actin-4h	1	24.92	24.87	24.66
		2	24.86
		3	24.83
3	Drought3-Actin-4h	1	24.54	24.61	24.66
		2	24.67
		3	24.62
1	Drought1-Actin-6h	1	24.45	24.5	24.18
		2	24.48
		3	24.57
2	Drought2-Actin-6h	1	23.78	23.86	24.18
		2	23.85
		3	23.95
3	Drought3-Actin-6h	1	24.12	24.18	24.18
		2	24.19
		3	24.23
1	Drought1-Actin-9h	1	26.16	26.19	26.3
		2	26.14
		3	26.27
2	Drought2-Actin-9h	1	26.27	26.33	26.3
		2	26.44
		3	26.28
3	Drought3-Actin-9h	1	26.4	26.38	26.3
		2	26.33
		3	26.41
1	Drought1-Actin-12h	1	26.41	26.29	26.22
		2	26.23
		3	26.23
2	Drought2-Actin-12h	1	26.18	26.15	26.22
		2	26.07
		3	26.2
3	Drought3-Actin-12h	1	26.16	26.21	26.22
		2	26.2
		3	26.27
1	Drought1-Actin-24h	1	25.98	25.97	25.89
		2	26
		3	25.93
2	Drought2-Actin-24h	1	25.7	25.72	25.89
		2	25.8
		3	25.66
3	Drought3-Actin-24h	1	25.97	25.98	25.89
		2	25.91
		3	26.06
1	Drought1-Actin-48h	1	26.92	26.97	26.89
		2	27.04
		3	26.95
2	Drought2-Actin-48h	1	26.92	26.89	26.89
		2	26.95
		3	26.8
3	Drought3-Actin-48h	1	26.81	26.8	26.89
		2	26.73
		3	26.86
1	Drought1-OsSCL28-1h	1	25.75	25.83		2.26	0.208772
		2	25.85
		3	25.89
2	Drought2-OsSCL28-1h	1	25.7	25.79		2.22	0.214641
		2	25.91
		3	25.76
3	Drought3-OsSCL28-1h	1	26.14	26.19		2.62	0.162668
		2	26.32
		3	26.11
1	Drought1-OsSCL28-2h	1	24.49	24.37		0.83	0.562529
		2	24.34
		3	24.28
2	Drought2-OsSCL28-2h	1	24.56	24.58		1.04	0.486327
		2	24.51
		3	24.67
3	Drought3-OsSCL28-2h	1	24.35	24.38		0.84	0.558644
		2	24.44
		3	24.35
1	Drought1-OsSCL28-4h	1	24.92	24.85		0.19	0.876606
		2	24.87
		3	24.76
2	Drought2-OsSCL28-4h	1	25.12	25.11		0.45	0.732043
		2	25.05
		3	25.16
3	Drought3-OsSCL28-4h	1	24.73	24.75		0.09	0.939523
		2	24.74
		3	24.78
1	Drought1-OsSCL28-6h	1	24.43	24.53		0.35	0.784584
		2	24.62
		3	24.54
2	Drought2-OsSCL28-6h	1	24.99	24.92		0.74	0.598739
		2	24.81
		3	24.96
3	Drought3-OsSCL28-6h	1	24.84	24.83		0.65	0.63728
		2	24.82
		3	24.83
1	Drought1-OsSCL28-9h	1	25.83	25.83		-0.47	1.38511
		2	25.89
		3	25.77
2	Drought2-OsSCL28-9h	1	26	25.92		-0.38	1.30134
		2	25.89
		3	25.87
3	Drought3-OsSCL28-9h	1	25.73	25.8		-0.5	1.41421
		2	25.77
		3	25.9
1	Drought1-OsSCL28-12h	1	25.78	25.83		-0.39	1.31039
		2	25.89
		3	25.82
2	Drought2-OsSCL28-12h	1	25.89	25.87		-0.35	1.27456
		2	25.88
		3	25.84
3	Drought3-OsSCL28-12h	1	25.86	25.86		-0.36	1.28343
		2	25.91
		3	25.81
1	Drought1-OsSCL28-24h	1	25.76	25.66		-0.23	1.17283
		2	25.62
		3	25.6
2	Drought2-OsSCL28-24h	1	25.67	25.64		-0.25	1.18921
		2	25.76
		3	25.66
3	Drought3-OsSCL28-24h	1	25.52	25.57		-0.32	1.24833
		2	25.6
		3	25.59
1	Drought1-OsSCL28-48h	1	27.39	27.44		0.55	0.68302
		2	27.47
		3	27.46
2	Drought2-OsSCL28-48h	1	27.22	27.32		0.43	0.742262
		2	27.36
		3	27.38
3	Drought3-OsSCL28-48h	1	27.04	27.12		0.23	0.852635
		2	27.25
		3	27.07

## Sheet: OsSCL25
qRT-PCR raw data for drought treatment of OsSCL25
Biological replicates	Sample Name	Technical replicates	Cq	Cq Mean (Technical replicates)	Cq Mean (Biological replicates)	ΔCq	2-ΔCq
1	Drought1-Actin-1h	1	25.88	25.94	26.23
		2	25.95
		3	25.99
2	Drought2-Actin-1h	1	26.21	26.26	26.23
		2	26.24
		3	26.33
3	Drought3-Actin-1h	1	26.54	26.49	26.23
		2	26.51
		3	26.42
1	Drought1-Actin-2h	1	26.4	26.31	26.3
		2	26.26
		3	26.27
2	Drought2-Actin-2h	1	26.32	26.34	26.3
		2	26.38
		3	26.32
3	Drought3-Actin-2h	1	26.14	26.25	26.3
		2	26.3
		3	26.31
1	Drought1-Actin-4h	1	25.72	25.75	26.06
		2	25.65
		3	25.88
2	Drought2-Actin-4h	1	26.11	26.12	26.06
		2	26.04
		3	26.21
3	Drought3-Actin-4h	1	26.3	26.31	26.06
		2	26.3
		3	26.33
1	Drought1-Actin-6h	1	26.48	26.59	26.55
		2	26.7
		3	26.59
2	Drought2-Actin-6h	1	26.5	26.54	26.55
		2	26.67
		3	26.45
3	Drought3-Actin-6h	1	26.5	26.52	26.55
		2	26.46
		3	26.6
1	Drought1-Actin-9h	1	26.82	26.83	26.7
		2	26.93
		3	26.74
2	Drought2-Actin-9h	1	26.67	26.71	26.7
		2	26.68
		3	26.78
3	Drought3-Actin-9h	1	26.67	26.55	26.7
		2	26.48
		3	26.5
1	Drought1-Actin-12h	1	26.88	26.96	26.97
		2	27.09
		3	26.91
2	Drought2-Actin-12h	1	26.91	27	26.97
		2	27.12
		3	26.97
3	Drought3-Actin-12h	1	26.85	26.95	26.97
		2	27.08
		3	26.92
1	Drought1-Actin-24h	1	26.48	26.56	26.59
		2	26.58
		3	26.62
2	Drought2-Actin-24h	1	26.56	26.47	26.59
		2	26.44
		3	26.41
3	Drought3-Actin-24h	1	26.71	26.74	26.59
		2	26.67
		3	26.84
1	Drought1-Actin-48h	1	26.94	26.99
		2	27.04
		3	26.99
2	Drought2-Actin-48h	1	27.03	27.06
		2	27.04
		3	27.11
3	Drought3-Actin-48h	1	26.94	26.89
		2	26.89
		3	26.84
1	Drought1-OsSCL25-1h	1	25.41	25.28		-0.95	1.93187
		2	25.26
		3	25.17
2	Drought2-OsSCL25-1h	1	25.08	25.18		-1.05	2.07053
		2	25.28
		3	25.18
3	Drought3-OsSCL25-1h	1	25.24	25.25		-0.98	1.97247
		2	25.31
		3	25.2
1	Drought1-OsSCL25-2h	1	26.36	26.47		0.17	0.888843
		2	26.52
		3	26.53
2	Drought2-OsSCL25-2h	1	26.31	26.37		0.07	0.952638
		2	26.33
		3	26.47
3	Drought3-OsSCL25-2h	1	26.35	26.34		0.04	0.972655
		2	26.29
		3	26.38
1	Drought1-OsSCL25-4h	1	26.62	26.54		0.48	0.716978
		2	26.48
		3	26.52
2	Drought2-OsSCL25-4h	1	26.6	26.62		0.56	0.678302
		2	26.55
		3	26.71
3	Drought3-OsSCL25-4h	1	26.6	26.64		0.58	0.668964
		2	26.64
		3	26.68
1	Drought1-OsSCL25-6h	1	27.33	27.27		0.72	0.607097
		2	27.17
		3	27.31
2	Drought2-OsSCL25-6h	1	27.22	27.28		0.73	0.602904
		2	27.29
		3	27.33
3	Drought3-OsSCL25-6h	1	27.37	27.39		0.84	0.558644
		2	27.48
		3	27.32
1	Drought1-OsSCL25-9h	1	28.74	28.83		2.13333	0.227931
		2	28.79
		3	28.96
2	Drought2-OsSCL25-9h	1	28.82	28.92		2.22333	0.214146
		2	29.02
		3	28.92
3	Drought3-OsSCL25-9h	1	28.88	28.88		2.18333	0.220166
		2	28.8
		3	28.96
1	Drought1-OsSCL25-12h	1	29.84	29.92		2.95	0.129408
		2	29.96
		3	29.96
2	Drought2-OsSCL25-12h	1	29.58	29.52		2.55	0.170755
		2	29.48
		3	29.5
3	Drought3-OsSCL25-12h	1	29.43	29.45		2.48	0.179244
		2	29.46
		3	29.46
1	Drought1-OsSCL25-24h	1	26.49	26.41		-0.18	1.13288
		2	26.32
		3	26.42
2	Drought2-OsSCL25-24h	1	26.38	26.33		-0.26	1.19748
		2	26.28
		3	26.34
3	Drought3-OsSCL25-24h	1	26.3	26.28		-0.31	1.23971
		2	26.29
		3	26.25
1	Drought1-OsSCL25-48h	1	27.65	27.63		0.65	0.63728
		2	27.64
		3	27.6
2	Drought2-OsSCL25-48h	1	27.79	27.86		0.88	0.543367
		2	27.86
		3	27.93
3	Drought3-OsSCL25-48h	1	27.73	27.7		0.72	0.607097
		2	27.68
		3	27.69

## Sheet: OsSCL26
qRT-PCR raw data for drought treatment of OsSCL26
Biological replicates	Sample Name	Technical replicates	Cq	Cq Mean (Technical replicates)	Cq Mean (Biological replicates)	ΔCq	2-ΔCq
1	Drought1-Actin-1h	1	23.46	23.51	23.57
		2	23.62
		3	23.45
2	Drought2-Actin-1h	1	23.71	23.75	23.57
		2	23.83
		3	23.71
3	Drought3-Actin-1h	1	23.49	23.45	23.57
		2	23.37
		3	23.49
1	Drought1-Actin-2h	1	23.58	23.49	23.54
		2	23.48
		3	23.41
2	Drought2-Actin-2h	1	23.6	23.55	23.54
		2	23.55
		3	23.5
3	Drought3-Actin-2h	1	23.7	23.58	23.54
		2	23.49
		3	23.55
1	Drought1-Actin-4h	1	24.47	24.5	24.66
		2	24.4
		3	24.63
2	Drought2-Actin-4h	1	24.91	24.87	24.66
		2	24.89
		3	24.81
3	Drought3-Actin-4h	1	24.63	24.61	24.66
		2	24.52
		3	24.68
1	Drought1-Actin-6h	1	24.51	24.5	24.18
		2	24.54
		3	24.45
2	Drought2-Actin-6h	1	23.79	23.86	24.18
		2	23.99
		3	23.8
3	Drought3-Actin-6h	1	24.27	24.18	24.18
		2	24.16
		3	24.11
1	Drought1-Actin-9h	1	26.19	26.19	26.3
		2	26.18
		3	26.2
2	Drought2-Actin-9h	1	26.35	26.33	26.3
		2	26.22
		3	26.42
3	Drought3-Actin-9h	1	26.45	26.38	26.3
		2	26.35
		3	26.34
1	Drought1-Actin-12h	1	26.22	26.29	26.22
		2	26.26
		3	26.39
2	Drought2-Actin-12h	1	26.26	26.15	26.22
		2	26.08
		3	26.11
3	Drought3-Actin-12h	1	26.17	26.21	26.22
		2	26.28
		3	26.18
1	Drought1-Actin-24h	1	25.98	25.97	25.89
		2	26.05
		3	25.88
2	Drought2-Actin-24h	1	25.69	25.72	25.89
		2	25.83
		3	25.64
3	Drought3-Actin-24h	1	26	25.98	25.89
		2	25.99
		3	25.95
1	Drought1-Actin-48h	1	26.96	26.97	26.89
		2	27.05
		3	26.9
2	Drought2-Actin-48h	1	26.86	26.89	26.89
		2	27
		3	26.81
3	Drought3-Actin-48h	1	26.83	26.8	26.89
		2	26.79
		3	26.78
1	Drought1-OsSCL26-1h	1	24.05	23.92		0.35	0.784584
		2	23.86
		3	23.85
2	Drought2-OsSCL26-1h	1	23.97	23.96		0.39	0.76313
		2	23.92
		3	23.99
3	Drought3-OsSCL26-1h	1	24.23	24.25		0.68	0.624165
		2	24.25
		3	24.27
1	Drought1-OsSCL26-2h	1	23.84	23.73		0.19	0.876606
		2	23.72
		3	23.63
2	Drought2-OsSCL26-2h	1	23.82	23.79		0.25	0.840896
		2	23.75
		3	23.8
3	Drought3-OsSCL26-2h	1	23.6	23.56		0.02	0.986233
		2	23.55
		3	23.53
1	Drought1-OsSCL26-4h	1	24.61	24.66		0	1
		2	24.65
		3	24.72
2	Drought2-OsSCL26-4h	1	25.34	25.34		0.68	0.624165
		2	25.43
		3	25.25
3	Drought3-OsSCL26-4h	1	24.83	24.72		0.06	0.959264
		2	24.65
		3	24.68
1	Drought1-OsSCL26-6h	1	24.57	24.53		0.35	0.784584
		2	24.52
		3	24.5
2	Drought2-OsSCL26-6h	1	25.33	25.33		1.15	0.450625
		2	25.44
		3	25.22
3	Drought3-OsSCL26-6h	1	24.75	24.83		0.65	0.63728
		2	24.95
		3	24.79
1	Drought1-OsSCL26-9h	1	26.72	26.64		0.34	0.790041
		2	26.62
		3	26.58
2	Drought2-OsSCL26-9h	1	26.91	26.89		0.59	0.664343
		2	26.89
		3	26.87
3	Drought3-OsSCL26-9h	1	26.62	26.63		0.33	0.795536
		2	26.59
		3	26.68
1	Drought1-OsSCL26-12h	1	26.19	26.24		0.02	0.986233
		2	26.16
		3	26.37
2	Drought2-OsSCL26-12h	1	26	26.01		-0.21	1.15669
		2	26.04
		3	25.99
3	Drought3-OsSCL26-12h	1	26.18	26.05		-0.17	1.12506
		2	26.03
		3	25.94
1	Drought1-OsSCL26-24h	1	25.45	25.43		-0.46	1.37554
		2	25.32
		3	25.52
2	Drought2-OsSCL26-24h	1	25.32	25.19		-0.7	1.6245
		2	25.27
		3	25.26
3	Drought3-OsSCL26-24h	1	25.49	25.37		-0.52	1.43396
		2	25.31
		3	25.38
1	Drought1-OsSCL26-48h	1	25.4	25.35		-1.54	2.90795
		2	25.29
		3	25.36
2	Drought2-OsSCL26-48h	1	25.25	25.36		-1.53	2.88786
		2	25.42
		3	25.41
3	Drought3-OsSCL26-48h	1	25.54	25.52		-1.37	2.58471
		2	25.46
		3	25.56

## Sheet: OsSC32
qRT-PCR raw data for drought treatment of OsSC32
Biological replicates	Sample Name	Technical replicates	Cq	Cq Mean (Technical replicates)	Cq Mean (Biological replicates)	ΔCq	2-ΔCq
1	Drought1-Actin-1h	1	23.43	23.51	23.57
		2	23.58
		3	23.52
2	Drought2-Actin-1h	1	23.77	23.75	23.57
		2	23.79
		3	23.69
3	Drought3-Actin-1h	1	23.43	23.45	23.57
		2	23.41
		3	23.51
1	Drought1-Actin-2h	1	23.44	23.49	23.54
		2	23.59
		3	23.44
2	Drought2-Actin-2h	1	23.52	23.55	23.54
		2	23.53
		3	23.6
3	Drought3-Actin-2h	1	23.49	23.58	23.54
		2	23.7
		3	23.55
1	Drought1-Actin-4h	1	24.53	24.5	24.66
		2	24.39
		3	24.58
2	Drought2-Actin-4h	1	24.83	24.87	24.66
		2	24.87
		3	24.91
3	Drought3-Actin-4h	1	24.71	24.61	24.66
		2	24.55
		3	24.57
1	Drought1-Actin-6h	1	24.4	24.5	24.18
		2	24.58
		3	24.52
2	Drought2-Actin-6h	1	23.84	23.86	24.18
		2	23.85
		3	23.89
3	Drought3-Actin-6h	1	24.15	24.18	24.18
		2	24.08
		3	24.31
1	Drought1-Actin-9h	1	26.15	26.19	26.3
		2	26.12
		3	26.3
2	Drought2-Actin-9h	1	26.25	26.33	26.3
		2	26.45
		3	26.29
3	Drought3-Actin-9h	1	26.3	26.38	26.3
		2	26.35
		3	26.49
1	Drought1-Actin-12h	1	26.22	26.29	26.22
		2	26.3
		3	26.35
2	Drought2-Actin-12h	1	26.15	26.15	26.22
		2	26.09
		3	26.21
3	Drought3-Actin-12h	1	26.25	26.21	26.22
		2	26.19
		3	26.19
1	Drought1-Actin-24h	1	26.05	25.97	25.89
		2	25.99
		3	25.87
2	Drought2-Actin-24h	1	25.7	25.72	25.89
		2	25.73
		3	25.73
3	Drought3-Actin-24h	1	26.06	25.98	25.89
		2	25.91
		3	25.97
1	Drought1-Actin-48h	1	27.03	26.97	26.89
		2	26.98
		3	26.9
2	Drought2-Actin-48h	1	26.94	26.89	26.89
		2	26.91
		3	26.82
3	Drought3-Actin-48h	1	26.7	26.8	26.89
		2	26.92
		3	26.78
1	Drought1-OsSC32-1h	1	22.53	22.44		-1.13	2.18859
		2	22.43
		3	22.36
2	Drought2-OsSC32-1h	1	22.68	22.79		-0.78	1.71713
		2	22.88
		3	22.81
3	Drought3-OsSC32-1h	1	22.58	22.61		-0.96	1.94531
		2	22.53
		3	22.72
1	Drought1-OsSC32-2h	1	22.29	22.34		-1.2	2.2974
		2	22.31
		3	22.42
2	Drought2-OsSC32-2h	1	22.23	22.29		-1.25	2.37841
		2	22.25
		3	22.39
3	Drought3-OsSC32-2h	1	22.44	22.49		-1.05	2.07053
		2	22.43
		3	22.6
1	Drought1-OsSC32-4h	1	24.18	24.25		-0.41	1.32869
		2	24.29
		3	24.28
2	Drought2-OsSC32-4h	1	24.33	24.36		-0.3	1.23114
		2	24.26
		3	24.49
3	Drought3-OsSC32-4h	1	23.69	23.76		-0.9	1.86607
		2	23.84
		3	23.75
1	Drought1-OsSC32-6h	1	23.63	23.65		-0.53	1.44393
		2	23.72
		3	23.6
2	Drought2-OsSC32-6h	1	23.53	23.47		-0.71	1.6358
		2	23.42
		3	23.46
3	Drought3-OsSC32-6h	1	23.56	23.47		-0.71	1.6358
		2	23.43
		3	23.42
1	Drought1-OsSC32-9h	1	26.26	26.29		-0.01	1.00696
		2	26.33
		3	26.28
2	Drought2-OsSC32-9h	1	26.31	26.36		0.06	0.959264
		2	26.4
		3	26.37
3	Drought3-OsSC32-9h	1	26.17	26.24		-0.06	1.04247
		2	26.31
		3	26.24
1	Drought1-OsSC32-12h	1	25.88	25.9		-0.32	1.24833
		2	25.87
		3	25.95
2	Drought2-OsSC32-12h	1	25.81	25.77		-0.45	1.36604
		2	25.77
		3	25.73
3	Drought3-OsSC32-12h	1	25.78	25.72		-0.5	1.41421
		2	25.73
		3	25.65
1	Drought1-OsSC32-24h	1	25.02	24.94		-0.95	1.93187
		2	24.97
		3	24.83
2	Drought2-OsSC32-24h	1	24.89	24.9		-0.99	1.98618
		2	24.97
		3	24.84
3	Drought3-OsSC32-24h	1	25.04	25.05		-0.84	1.79005
		2	25.12
		3	24.99
1	Drought1-OsSC32-48h	1	26.52	26.53		-0.36	1.28343
		2	26.6
		3	26.47
2	Drought2-OsSC32-48h	1	26.29	26.18		-0.71	1.6358
		2	26.16
		3	26.09
3	Drought3-OsSC32-48h	1	26.81	26.68		-0.21	1.15669
		2	26.57
		3	26.66

## Sheet: OsSC34
qRT-PCR raw data for drought treatment of OsSC32
Biological replicates	Sample Name	Technical replicates	Cq	Cq Mean (Technical replicates)	Cq Mean (Biological replicates)	ΔCq	2-ΔCq
1	Drought1-Actin-1h	1	23.57	23.51	23.57
		2	23.52
		3	23.44
2	Drought2-Actin-1h	1	23.72	23.75	23.57
		2	23.7
		3	23.83
3	Drought3-Actin-1h	1	23.48	23.45	23.57
		2	23.5
		3	23.37
1	Drought1-Actin-2h	1	23.51	23.49	23.54
		2	23.52
		3	23.44
2	Drought2-Actin-2h	1	23.56	23.55	23.54
		2	23.58
		3	23.51
3	Drought3-Actin-2h	1	23.53	23.58	23.54
		2	23.65
		3	23.56
1	Drought1-Actin-4h	1	24.41	24.5	24.66
		2	24.56
		3	24.53
2	Drought2-Actin-4h	1	24.88	24.87	24.66
		2	24.96
		3	24.77
3	Drought3-Actin-4h	1	24.6	24.61	24.66
		2	24.53
		3	24.7
1	Drought1-Actin-6h	1	24.49	24.5	24.18
		2	24.49
		3	24.52
2	Drought2-Actin-6h	1	23.75	23.86	24.18
		2	23.88
		3	23.95
3	Drought3-Actin-6h	1	24.21	24.18	24.18
		2	24.25
		3	24.08
1	Drought1-Actin-9h	1	26.09	26.19	26.3
		2	26.23
		3	26.25
2	Drought2-Actin-9h	1	26.23	26.33	26.3
		2	26.37
		3	26.39
3	Drought3-Actin-9h	1	26.28	26.38	26.3
		2	26.46
		3	26.4
1	Drought1-Actin-12h	1	26.27	26.29	26.22
		2	26.31
		3	26.29
2	Drought2-Actin-12h	1	26.23	26.15	26.22
		2	26.07
		3	26.15
3	Drought3-Actin-12h	1	26.2	26.21	26.22
		2	26.29
		3	26.14
1	Drought1-Actin-24h	1	25.91	25.97	25.89
		2	26.02
		3	25.98
2	Drought2-Actin-24h	1	25.74	25.72	25.89
		2	25.66
		3	25.76
3	Drought3-Actin-24h	1	25.91	25.98	25.89
		2	25.95
		3	26.08
1	Drought1-Actin-48h	1	26.89	26.97	26.89
		2	27.04
		3	26.98
2	Drought2-Actin-48h	1	26.98	26.89	26.89
		2	26.84
		3	26.85
3	Drought3-Actin-48h	1	26.73	26.8	26.89
		2	26.92
		3	26.75
1	Drought1-OsSC34-1h	1	24.76	24.84		1.27	0.41466
		2	24.9
		3	24.86
2	Drought2-OsSC34-1h	1	24.6	24.53		0.96	0.514057
		2	24.48
		3	24.51
3	Drought3-OsSC34-1h	1	24.62	24.52		0.95	0.517632
		2	24.41
		3	24.53
1	Drought1-OsSC34-2h	1	23.08	22.99		-0.55	1.46409
		2	22.99
		3	22.9
2	Drought2-OsSC34-2h	1	23.62	23.64		0.1	0.933033
		2	23.57
		3	23.73
3	Drought3-OsSC34-2h	1	23.41	23.47		-0.07	1.04972
		2	23.46
		3	23.54
1	Drought1-OsSC34-4h	1	23.87	23.79		-0.87	1.82766
		2	23.78
		3	23.72
2	Drought2-OsSC34-4h	1	23.55	23.5		-1.16	2.23457
		2	23.41
		3	23.54
3	Drought3-OsSC34-4h	1	23.43	23.42		-1.24	2.36199
		2	23.48
		3	23.35
1	Drought1-OsSC34-6h	1	23.57	23.66		-0.52	1.43396
		2	23.66
		3	23.75
2	Drought2-OsSC34-6h	1	23.66	23.54		-0.64	1.55833
		2	23.5
		3	23.46
3	Drought3-OsSC34-6h	1	24.17	24.14		-0.04	1.02811
		2	24.04
		3	24.21
1	Drought1-OsSC34-9h	1	24.8	24.84		-1.46	2.75108
		2	24.87
		3	24.85
2	Drought2-OsSC34-9h	1	24.99	24.86		-1.44	2.71321
		2	24.76
		3	24.83
3	Drought3-OsSC34-9h	1	24.92	24.81		-1.49	2.80889
		2	24.71
		3	24.8
1	Drought1-OsSC34-12h	1	23.78	23.86		-2.36	5.1337
		2	23.9
		3	23.9
2	Drought2-OsSC34-12h	1	23.97	24.07		-2.15	4.43828
		2	24.14
		3	24.1
3	Drought3-OsSC34-12h	1	24.05	24.03		-2.19	4.56305
		2	23.95
		3	24.09
1	Drought1-OsSC34-24h	1	24.69	24.79		-1.1	2.14355
		2	24.89
		3	24.79
2	Drought2-OsSC34-24h	1	25.02	25.04		-0.85	1.8025
		2	25.1
		3	25.06
3	Drought3-OsSC34-24h	1	25.23	25.22		-0.67	1.59107
		2	25.29
		3	25.21
1	Drought1-OsSC34-48h	1	27.53	27.59		0.7	0.615572
		2	27.66
		3	27.58
2	Drought2-OsSC34-48h	1	26.83	26.85		-0.04	1.02811
		2	26.74
		3	26.98
3	Drought3-OsSC34-48h	1	26.74	26.82		-0.07	1.04972
		2	26.79
		3	26.93

## Sheet: OsSC25
qRT-PCR raw data for drought treatment of OsSC25
Biological replicates	Sample Name	Technical replicates	Cq	Cq Mean (Technical replicates)	Cq Mean (Biological replicates)	ΔCq	2-ΔCq
1	Drought1-Actin-1h	1	23.63	23.51	23.57
		2	23.45
		3	23.45
2	Drought2-Actin-1h	1	23.79	23.75	23.57
		2	23.78
		3	23.68
3	Drought3-Actin-1h	1	23.41	23.45	23.57
		2	23.42
		3	23.52
1	Drought1-Actin-2h	1	23.4	23.49	23.54
		2	23.6
		3	23.47
2	Drought2-Actin-2h	1	23.5	23.55	23.54
		2	23.52
		3	23.63
3	Drought3-Actin-2h	1	23.63	23.58	23.54
		2	23.58
		3	23.53
1	Drought1-Actin-4h	1	24.51	24.5	24.66
		2	24.56
		3	24.43
2	Drought2-Actin-4h	1	25	24.87	24.66
		2	24.8
		3	24.81
3	Drought3-Actin-4h	1	24.63	24.61	24.66
		2	24.58
		3	24.62
1	Drought1-Actin-6h	1	24.48	24.5	24.18
		2	24.5
		3	24.52
2	Drought2-Actin-6h	1	23.83	23.86	24.18
		2	23.85
		3	23.9
3	Drought3-Actin-6h	1	24.2	24.18	24.18
		2	24.13
		3	24.21
1	Drought1-Actin-9h	1	26.16	26.19	26.3
		2	26.12
		3	26.29
2	Drought2-Actin-9h	1	26.33	26.33	26.3
		2	26.33
		3	26.33
3	Drought3-Actin-9h	1	26.36	26.38	26.3
		2	26.33
		3	26.45
1	Drought1-Actin-12h	1	26.24	26.29	26.22
		2	26.4
		3	26.23
2	Drought2-Actin-12h	1	26.15	26.15	26.22
		2	26.17
		3	26.13
3	Drought3-Actin-12h	1	26.12	26.21	26.22
		2	26.21
		3	26.3
1	Drought1-Actin-24h	1	26.06	25.97	25.89
		2	25.96
		3	25.89
2	Drought2-Actin-24h	1	25.68	25.72	25.89
		2	25.84
		3	25.64
3	Drought3-Actin-24h	1	25.9	25.98	25.89
		2	25.93
		3	26.11
1	Drought1-Actin-48h	1	27.04	26.97	26.89
		2	26.87
		3	27
2	Drought2-Actin-48h	1	26.9	26.89	26.89
		2	26.8
		3	26.97
3	Drought3-Actin-48h	1	26.84	26.8	26.89
		2	26.85
		3	26.71
1	Drought1-OsSC25-1h	1	29.6	29.54		5.97	0.0159533
		2	29.57
		3	29.45
2	Drought2-OsSC25-1h	1	29.27	29.32		5.75	0.0185814
		2	29.25
		3	29.44
3	Drought3-OsSC25-1h	1	29.49	29.5		5.93	0.0164018
		2	29.6
		3	29.41
1	Drought1-OsSC25-2h	1	28.22	28.22		4.68	0.0390103
		2	28.24
		3	28.2
2	Drought2-OsSC25-2h	1	28.67	28.66		5.12	0.0287559
		2	28.61
		3	28.7
3	Drought3-OsSC25-2h	1	27.9	27.87		4.33	0.049721
		2	27.79
		3	27.92
1	Drought1-OsSC25-4h	1	28.63	28.6		3.94	0.0651541
		2	28.5
		3	28.67
2	Drought2-OsSC25-4h	1	28.46	28.41		3.75	0.0743254
		2	28.31
		3	28.46
3	Drought3-OsSC25-4h	1	28.52	28.51		3.85	0.0693481
		2	28.41
		3	28.6
1	Drought1-OsSC25-6h	1	27.74	27.68		3.5	0.0883883
		2	27.57
		3	27.73
2	Drought2-OsSC25-6h	1	27.52	27.59		3.41	0.0940779
		2	27.61
		3	27.64
3	Drought3-OsSC25-6h	1	27.77	27.68		3.5	0.0883883
		2	27.67
		3	27.6
1	Drought1-OsSC25-9h	1	29.52	29.53		3.23	0.106579
		2	29.61
		3	29.46
2	Drought2-OsSC25-9h	1	29.81	29.78		3.48	0.0896222
		2	29.76
		3	29.77
3	Drought3-OsSC25-9h	1	29.9	30		3.7	0.0769465
		2	29.98
		3	30.12
1	Drought1-OsSC25-12h	1	30.33	30.22		4	0.0625
		2	30.2
		3	30.13
2	Drought2-OsSC25-12h	1	30.1	30.13		3.91	0.0665231
		2	30.08
		3	30.21
3	Drought3-OsSC25-12h	1	30.01	30.02		3.8	0.0717936
		2	30.06
		3	29.99
1	Drought1-OsSC25-24h	1	30.78	30.77		4.88	0.0339605
		2	30.67
		3	30.86
2	Drought2-OsSC25-24h	1	30.87	30.95		5.06	0.029977
		2	30.87
		3	31.07
3	Drought3-OsSC25-24h	1	30.52	30.5		4.61	0.0409498
		2	30.48
		3	30.44
1	Drought1-OsSC25-48h	1	31.55	31.65		4.76	0.036906
		2	31.75
		3	31.65
2	Drought2-OsSC25-48h	1	31.42	31.49		4.6	0.0412346
		2	31.61
		3	31.44
3	Drought3-OsSC25-48h	1	31.27	31.33		4.44	0.0460709
		2	31.31
		3	31.41

## Sheet: OsSR45a
qRT-PCR raw data for drought treatment of OsSR45a
Biological replicates	Sample Name	Technical replicates	Cq	Cq Mean (Technical replicates)	Cq Mean (Biological replicates)	ΔCq	2-ΔCq
1	Drought1-Actin-1h	1	23.42	23.51	23.57
		2	23.48
		3	23.63
2	Drought2-Actin-1h	1	23.74	23.75	23.57
		2	23.86
		3	23.65
3	Drought3-Actin-1h	1	23.46	23.45	23.57
		2	23.34
		3	23.55
1	Drought1-Actin-2h	1	23.49	23.49	23.54
		2	23.58
		3	23.4
2	Drought2-Actin-2h	1	23.58	23.55	23.54
		2	23.46
		3	23.61
3	Drought3-Actin-2h	1	23.68	23.58	23.54
		2	23.51
		3	23.55
1	Drought1-Actin-4h	1	24.42	24.5	24.66
		2	24.61
		3	24.47
2	Drought2-Actin-4h	1	24.95	24.87	24.66
		2	24.9
		3	24.76
3	Drought3-Actin-4h	1	24.5	24.61	24.66
		2	24.71
		3	24.62
1	Drought1-Actin-6h	1	24.53	24.5	24.18
		2	24.5
		3	24.47
2	Drought2-Actin-6h	1	23.82	23.86	24.18
		2	23.96
		3	23.8
3	Drought3-Actin-6h	1	24.18	24.18	24.18
		2	24.28
		3	24.08
1	Drought1-Actin-9h	1	26.1	26.19	26.3
		2	26.27
		3	26.2
2	Drought2-Actin-9h	1	26.38	26.33	26.3
		2	26.28
		3	26.33
3	Drought3-Actin-9h	1	26.33	26.38	26.3
		2	26.34
		3	26.47
1	Drought1-Actin-12h	1	26.39	26.29	26.22
		2	26.18
		3	26.3
2	Drought2-Actin-12h	1	26.23	26.15	26.22
		2	26.06
		3	26.16
3	Drought3-Actin-12h	1	26.28	26.21	26.22
		2	26.23
		3	26.12
1	Drought1-Actin-24h	1	26.03	25.97	25.89
		2	25.95
		3	25.93
2	Drought2-Actin-24h	1	25.68	25.72	25.89
		2	25.79
		3	25.69
3	Drought3-Actin-24h	1	25.96	25.98	25.89
		2	26.09
		3	25.89
1	Drought1-Actin-48h	1	27	26.97	26.89
		2	26.87
		3	27.04
2	Drought2-Actin-48h	1	27.01	26.89	26.89
		2	26.84
		3	26.82
3	Drought3-Actin-48h	1	26.74	26.8	26.89
		2	26.9
		3	26.76
1	Drought1-OsSR45a-1h	1	20.9	20.85		-2.72	6.58873
		2	20.89
		3	20.76
2	Drought2-OsSR45a-1h	1	20.39	20.34		-3.23	9.38268
		2	20.36
		3	20.27
3	Drought3-OsSR45a-1h	1	20.93	20.84		-2.73	6.63456
		2	20.8
		3	20.79
1	Drought1-OsSR45a-2h	1	20.82	20.89		-2.65	6.27667
		2	20.97
		3	20.88
2	Drought2-OsSR45a-2h	1	20.81	20.92		-2.62	6.1475
		2	21
		3	20.95
3	Drought3-OsSR45a-2h	1	21.63	21.56		-1.98	3.94493
		2	21.59
		3	21.46
1	Drought1-OsSR45a-4h	1	21.42	21.45		-3.21	9.25351
		2	21.41
		3	21.52
2	Drought2-OsSR45a-4h	1	21.35	21.38		-3.28	9.71356
		2	21.37
		3	21.42
3	Drought3-OsSR45a-4h	1	21.56	21.61		-3.05	8.28212
		2	21.64
		3	21.63
1	Drought1-OsSR45a-6h	1	21.83	21.75		-2.43	5.38893
		2	21.71
		3	21.71
2	Drought2-OsSR45a-6h	1	21.21	21.28		-2.9	7.46426
		2	21.23
		3	21.4
3	Drought3-OsSR45a-6h	1	21.67	21.75		-2.43	5.38893
		2	21.81
		3	21.77
1	Drought1-OsSR45a-9h	1	21.67	21.67		-4.63	24.761
		2	21.69
		3	21.65
2	Drought2-OsSR45a-9h	1	21.58	21.58		-4.72	26.3549
		2	21.58
		3	21.58
3	Drought3-OsSR45a-9h	1	21.65	21.64		-4.66	25.2813
		2	21.57
		3	21.7
1	Drought1-OsSR45a-12h	1	21.54	21.55		-4.67	25.4572
		2	21.64
		3	21.47
2	Drought2-OsSR45a-12h	1	21.38	21.49		-4.73	26.5382
		2	21.5
		3	21.59
3	Drought3-OsSR45a-12h	1	21.71	21.72		-4.5	22.6274
		2	21.78
		3	21.67
1	Drought1-OsSR45a-24h	1	22	22.04		-3.85	14.42
		2	22.11
		3	22.01
2	Drought2-OsSR45a-24h	1	21.92	21.91		-3.98	15.7797
		2	21.89
		3	21.97
3	Drought3-OsSR45a-24h	1	21.8	21.8		-4.09	17.0299
		2	21.7
		3	21.7
1	Drought1-OsSR45a-48h	1	21.56	21.47		-5.42	42.8137
		2	21.49
		3	21.36
2	Drought2-OsSR45a-48h	1	21.61	21.52		-5.37	41.3553
		2	21.45
		3	21.5
3	Drought3-OsSR45a-48h	1	21.71	21.59		-5.3	39.3966
		2	21.52
		3	21.54

[truncated: 14 more sheets: OsSR45, OsRS2Z39, OsRS2Z37, OsRS2Z36, OsRS2Z38, OsRSZ21a, OsRSZ21, OsRSZ23, OsRS29, OsRS33, OsSR33, OsSR32, OsSR33a, OsSR40]
