# Supplementary material for: Comprehensive study of serine/arginine-rich (SR) gene family in rice: characterization, evolution and expression analysis
Source: PeerJ journal article supplement (doi:10.7717/peerj.16193), 2023-10-13
Supplement: qRTPCR_raw_dataTableS9S16.zip [file Supplemental Table_S13.xlsx]

## Sheet: OsSCL30a
qRT-PCR raw data for cold treatment of OsSCL30a
Biological replicates	Sample Name	Technical replicates	Cq	Cq Mean (Technical replicates)	Cq Mean (Biological replicates)	ΔCq	2-ΔCq
1	Cold1-Actin-1h	1	23.81	23.85	23.3033
		2	23.94
		3	23.8
2	Cold2-Actin-1h	1	22.8	22.89	23.3033
		2	22.91
		3	22.96
3	Cold3-Actin-1h	1	23.1	23.17	23.3033
		2	23.24
		3	23.17
1	Cold1-Actin-2h	1	23.94	23.93	24.25
		2	23.92
		3	23.93
2	Cold2-Actin-2h	1	24.33	24.35	24.25
		2	24.47
		3	24.25
3	Cold3-Actin-2h	1	24.45	24.47	24.25
		2	24.36
		3	24.6
1	Cold1-Actin-4h	1	22.82	22.74	22.74
		2	22.76
		3	22.64
2	Cold2-Actin-4h	1	22.74	22.69	22.74
		2	22.61
		3	22.72
3	Cold3-Actin-4h	1	22.91	22.86	22.74
		2	22.75
		3	22.92
1	Cold1-Actin-6h	1	24.23	24.27	24.27
		2	24.27
		3	24.31
2	Cold2-Actin-6h	1	23.59	23.7	24.27
		2	23.79
		3	23.72
3	Cold3-Actin-6h	1	23.98	23.92	24.27
		2	23.85
		3	23.93
1	Cold1-Actin-9h	1	22.44	22.55	23.1533
		2	22.55
		3	22.66
2	Cold2-Actin-9h	1	23.33	23.3	23.1533
		2	23.19
		3	23.38
3	Cold3-Actin-9h	1	23.64	23.61	23.1533
		2	23.65
		3	23.54
1	Cold1-Actin-12h	1	23.96	23.93	23.93
		2	23.88
		3	23.95
2	Cold2-Actin-12h	1	24.27	24.32	23.93
		2	24.44
		3	24.25
3	Cold3-Actin-12h	1	23.77	23.65	23.93
		2	23.59
		3	23.59
1	Cold1-Actin-24h	1	23.24	23.24	23.24
		2	23.2
		3	23.28
2	Cold2-Actin-24h	1	23.44	23.49	23.24
		2	23.57
		3	23.46
3	Cold3-Actin-24h	1	23.16	23.24	23.24
		2	23.31
		3	23.25
1	Cold1-Actin-48h	1	23.55	23.53	23.5567
		2	23.58
		3	23.46
2	Cold2-Actin-48h	1	23.52	23.59	23.5567
		2	23.68
		3	23.57
3	Cold3-Actin-48h	1	23.45	23.55	23.5567
		2	23.62
		3	23.58
1	Cold1-OsSCL30a-1h	1	28.25	28.24		4.93667	0.0326524
		2	28.22
		3	28.25
2	Cold2-OsSCL30a-1h	1	27.41	27.39		4.08667	0.058856
		2	27.37
		3	27.39
3	Cold3-OsSCL30a-1h	1	27.62	27.49		4.18667	0.0549146
		2	27.41
		3	27.44
1	Cold1-OsSCL30a-2h	1	29.6	29.48		5.23	0.0266448
		2	29.46
		3	29.38
2	Cold2-OsSCL30a-2h	1	28.69	28.8		4.55	0.0426888
		2	28.84
		3	28.87
3	Cold3-OsSCL30a-2h	1	29.57	29.57		5.32	0.0250334
		2	29.48
		3	29.66
1	Cold1-OsSCL30a-4h	1	24.67	24.73		1.99	0.251739
		2	24.76
		3	24.76
2	Cold2-OsSCL30a-4h	1	24.7	24.77		2.03	0.244855
		2	24.87
		3	24.74
3	Cold3-OsSCL30a-4h	1	24.65	24.73		1.99	0.251739
		2	24.84
		3	24.7
1	Cold1-OsSCL30a-6h	1	29.5	29.4		5.13	0.0285572
		2	29.3
		3	29.4
2	Cold2-OsSCL30a-6h	1	28.78	28.73		4.46	0.0454366
		2	28.75
		3	28.66
3	Cold3-OsSCL30a-6h	1	29.41	29.4		5.13	0.0285572
		2	29.4
		3	29.39
1	Cold1-OsSCL30a-9h	1	27.91	27.96		4.80667	0.0357313
		2	27.92
		3	28.05
2	Cold2-OsSCL30a-9h	1	27.85	27.87		4.71667	0.0380314
		2	27.84
		3	27.92
3	Cold3-OsSCL30a-9h	1	28.96	28.92		5.76667	0.0183679
		2	28.96
		3	28.84
1	Cold1-OsSCL30a-12h	1	27.84	27.93		4	0.0625
		2	28.06
		3	27.89
2	Cold2-OsSCL30a-12h	1	28.66	28.6		4.67	0.0392817
		2	28.64
		3	28.5
3	Cold3-OsSCL30a-12h	1	29.8	29.83		5.9	0.0167465
		2	29.92
		3	29.77
1	Cold1-OsSCL30a-24h	1	28.98	28.92		5.68	0.0195052
		2	28.91
		3	28.87
2	Cold2-OsSCL30a-24h	1	29.21	29.18		5.94	0.0162885
		2	29.11
		3	29.22
3	Cold3-OsSCL30a-24h	1	29.27	29.32		6.08	0.0147822
		2	29.35
		3	29.34
1	Cold1-OsSCL30a-48h	1	27.91	27.93		4.37333	0.0482498
		2	27.95
		3	27.93
2	Cold2-OsSCL30a-48h	1	27.77	27.8		4.24333	0.0527994
		2	27.8
		3	27.83
3	Cold3-OsSCL30a-48h	1	28.45	28.37		4.81333	0.0355666
		2	28.37
		3	28.29
				1h	0.0326524	0.058856	0.0549146
				2h	0.0266448	0.0426888	0.0250334
				4h	0.251739	0.244855	0.251739
				6h	0.0285572	0.0454366	0.0285572
				9h	0.0357313	0.0380314	0.0183679
				12h	0.0625	0.0392817	0.0167465
				24h	0.0195052	0.0162885	0.0147822
				48h	0.0482498	0.0527994	0.0355666

## Sheet: OsSCL30
qRT-PCR raw data for cold treatment of OsSCL30
Biological replicates	Sample Name	Technical replicates	Cq	Cq Mean (Technical replicates)	Cq Mean (Biological replicates)	ΔCq	2-ΔCq
1	Cold1-Actin-1h	1	23.95	23.85	23.3033
		2	23.76
		3	23.84
2	Cold2-Actin-1h	1	22.93	22.89	23.3033
		2	22.88
		3	22.86
3	Cold3-Actin-1h	1	23.24	23.17	23.3033
		2	23.09
		3	23.18
1	Cold1-Actin-2h	1	23.89	23.93	24.25
		2	23.99
		3	23.91
2	Cold2-Actin-2h	1	24.37	24.35	24.25
		2	24.37
		3	24.31
3	Cold3-Actin-2h	1	24.49	24.47	24.25
		2	24.43
		3	24.49
1	Cold1-Actin-4h	1	22.81	22.74	22.74
		2	22.74
		3	22.67
2	Cold2-Actin-4h	1	22.69	22.69	22.74
		2	22.79
		3	22.59
3	Cold3-Actin-4h	1	22.76	22.86	22.74
		2	22.96
		3	22.86
1	Cold1-Actin-6h	1	24.18	24.27	24.27
		2	24.23
		3	24.4
2	Cold2-Actin-6h	1	23.63	23.7	24.27
		2	23.75
		3	23.72
3	Cold3-Actin-6h	1	23.91	23.92	24.27
		2	23.82
		3	24.03
1	Cold1-Actin-9h	1	22.51	22.55	23.1533
		2	22.67
		3	22.47
2	Cold2-Actin-9h	1	23.3	23.3	23.1533
		2	23.23
		3	23.37
3	Cold3-Actin-9h	1	23.51	23.61	23.1533
		2	23.69
		3	23.63
1	Cold1-Actin-12h	1	23.94	23.93	23.93
		2	23.83
		3	24.02
2	Cold2-Actin-12h	1	24.37	24.32	23.93
		2	24.36
		3	24.23
3	Cold3-Actin-12h	1	23.63	23.65	23.93
		2	23.66
		3	23.66
1	Cold1-Actin-24h	1	23.22	23.24	23.24
		2	23.13
		3	23.37
2	Cold2-Actin-24h	1	23.46	23.49	23.24
		2	23.46
		3	23.55
3	Cold3-Actin-24h	1	23.28	23.24	23.24
		2	23.23
		3	23.21
1	Cold1-Actin-48h	1	23.57	23.53	23.5567
		2	23.51
		3	23.51
2	Cold2-Actin-48h	1	23.48	23.59	23.5567
		2	23.72
		3	23.57
3	Cold3-Actin-48h	1	23.61	23.55	23.5567
		2	23.54
		3	23.5
1	Cold1-OsSCL30-1h	1	27.28	27.3		3.45	0.0915054
		2	27.25
		3	27.37
2	Cold2-OsSCL30-1h	1	27.7	27.64		3.79	0.072293
		2	27.56
		3	27.66
3	Cold3-OsSCL30-1h	1	27.23	27.2		3.35	0.098073
		2	27.21
		3	27.16
1	Cold1-OsSCL30-2h	1	29.45	29.53		5.18	0.0275845
		2	29.65
		3	29.49
2	Cold2-OsSCL30-2h	1	29.84	29.89		5.54	0.0214928
		2	29.82
		3	30.01
3	Cold3-OsSCL30-2h	1	29.4	29.36		5.01	0.0310341
		2	29.32
		3	29.36
1	Cold1-OsSCL30-4h	1	29.5	29.44		6.75	0.00929068
		2	29.48
		3	29.34
2	Cold2-OsSCL30-4h	1	28.8	28.89		6.2	0.0136024
		2	28.92
		3	28.95
3	Cold3-OsSCL30-4h	1	29.45	29.53		6.84	0.00872881
		2	29.62
		3	29.52
1	Cold1-OsSCL30-6h	1	29.94	29.92		5.65	0.019915
		2	29.81
		3	30.01
2	Cold2-OsSCL30-6h	1	30.17	30.14		5.87	0.0170983
		2	30.08
		3	30.17
3	Cold3-OsSCL30-6h	1	30.07	30.18		5.91	0.0166308
		2	30.3
		3	30.17
1	Cold1-OsSCL30-9h	1	29.45	29.34		6.04	0.0151977
		2	29.24
		3	29.33
2	Cold2-OsSCL30-9h	1	28.49	28.48		5.18	0.0275845
		2	28.46
		3	28.49
3	Cold3-OsSCL30-9h	1	28.95	28.92		5.62	0.0203335
		2	28.85
		3	28.96
1	Cold1-OsSCL30-12h	1	29.93	29.98		6.33	0.0124303
		2	29.91
		3	30.1
2	Cold2-OsSCL30-12h	1	29.52	29.53		5.88	0.0169802
		2	29.49
		3	29.58
3	Cold3-OsSCL30-12h	1	29.21	29.09		5.44	0.0230355
		2	29
		3	29.06
1	Cold1-OsSCL30-24h	1	28.45	28.54		5.05	0.0301855
		2	28.64
		3	28.53
2	Cold2-OsSCL30-24h	1	28.57	28.51		5.02	0.0308198
		2	28.53
		3	28.43
3	Cold3-OsSCL30-24h	1	28.91	29		5.51	0.0219445
		2	28.96
		3	29.13
1	Cold1-OsSCL30-48h	1	28.14	28.18		4.65	0.03983
		2	28.23
		3	28.17
2	Cold2-OsSCL30-48h	1	27.86	27.81		4.28	0.0514744
		2	27.73
		3	27.84
3	Cold3-OsSCL30-48h	1	27.48	27.56		4.03	0.0612138
		2	27.68
		3	27.52
				1h	0.0915054	0.072293	0.098073
				2h	0.0275845	0.0214928	0.0310341
				4h	0.00929068	0.0136024	0.00872881
				6h	0.019915	0.0170983	0.0166308
				9h	0.0151977	0.0275845	0.0203335
				12h	0.0124303	0.0169802	0.0230355
				24h	0.0301855	0.0308198	0.0219445
				48h	0.03983	0.0514744	0.0612138

## Sheet: OsSCL57
qRT-PCR raw data for cold treatment of OsSCL57
Biological replicates	Sample Name	Technical replicates	Cq	Cq Mean (Technical replicates)	Cq Mean (Biological replicates)	ΔCq	2-ΔCq
1	Cold1-Actin-1h	1	23.78	23.85	23.3033
		2	23.82
		3	23.95
2	Cold2-Actin-1h	1	22.82	22.89	23.3033
		2	22.89
		3	22.96
3	Cold3-Actin-1h	1	23.3	23.17	23.3033
		2	23.14
		3	23.07
1	Cold1-Actin-2h	1	24.01	23.93	24.25
		2	23.92
		3	23.86
2	Cold2-Actin-2h	1	24.32	24.35	24.25
		2	24.27
		3	24.46
3	Cold3-Actin-2h	1	24.45	24.47	24.25
		2	24.57
		3	24.39
1	Cold1-Actin-4h	1	22.7	22.74	22.74
		2	22.77
		3	22.75
2	Cold2-Actin-4h	1	22.74	22.69	22.74
		2	22.64
		3	22.69
3	Cold3-Actin-4h	1	22.75	22.86	22.74
		2	22.89
		3	22.94
1	Cold1-Actin-6h	1	24.32	24.27	24.27
		2	24.19
		3	24.3
2	Cold2-Actin-6h	1	23.79	23.7	24.27
		2	23.6
		3	23.71
3	Cold3-Actin-6h	1	23.93	23.92	24.27
		2	23.81
		3	24.02
1	Cold1-Actin-9h	1	22.6	22.55	23.1533
		2	22.53
		3	22.52
2	Cold2-Actin-9h	1	23.35	23.3	23.1533
		2	23.29
		3	23.26
3	Cold3-Actin-9h	1	23.74	23.61	23.1533
		2	23.52
		3	23.57
1	Cold1-Actin-12h	1	23.83	23.93	23.93
		2	23.94
		3	24.02
2	Cold2-Actin-12h	1	24.23	24.32	23.93
		2	24.3
		3	24.43
3	Cold3-Actin-12h	1	23.54	23.65	23.93
		2	23.74
		3	23.67
1	Cold1-Actin-24h	1	23.18	23.24	23.24
		2	23.27
		3	23.27
2	Cold2-Actin-24h	1	23.39	23.49	23.24
		2	23.61
		3	23.47
3	Cold3-Actin-24h	1	23.3	23.24	23.24
		2	23.28
		3	23.14
1	Cold1-Actin-48h	1	23.52	23.53	23.5567
		2	23.58
		3	23.49
2	Cold2-Actin-48h	1	23.66	23.59	23.5567
		2	23.52
		3	23.59
3	Cold3-Actin-48h	1	23.46	23.55	23.5567
		2	23.68
		3	23.51
1	Cold1-OsSCL57-1h	1	26.73	26.77		3.46667	0.0904543
		2	26.85
		3	26.73
2	Cold2-OsSCL57-1h	1	27.07	26.96		3.65667	0.0792928
		2	26.87
		3	26.94
3	Cold3-OsSCL57-1h	1	26.71	26.81		3.50667	0.0879808
		2	26.82
		3	26.9
1	Cold1-OsSCL57-2h	1	27.89	27.9		3.65	0.07966
		2	27.9
		3	27.91
2	Cold2-OsSCL57-2h	1	27.99	27.96		3.71	0.076415
		2	27.98
		3	27.91
3	Cold3-OsSCL57-2h	1	27.67	27.78		3.53	0.0865693
		2	27.89
		3	27.78
1	Cold1-OsSCL57-4h	1	26.7	26.7		3.96	0.0642571
		2	26.65
		3	26.75
2	Cold2-OsSCL57-4h	1	26.5	26.42		3.68	0.0780207
		2	26.31
		3	26.45
3	Cold3-OsSCL57-4h	1	26.54	26.54		3.8	0.0717936
		2	26.54
		3	26.54
1	Cold1-OsSCL57-6h	1	27.57	27.48		3.21	0.108067
		2	27.38
		3	27.49
2	Cold2-OsSCL57-6h	1	27.66	27.59		3.32	0.100134
		2	27.63
		3	27.48
3	Cold3-OsSCL57-6h	1	27.31	27.34		3.07	0.11908
		2	27.45
		3	27.26
1	Cold1-OsSCL57-9h	1	26.67	26.71		3.55667	0.0849839
		2	26.74
		3	26.72
2	Cold2-OsSCL57-9h	1	26.6	26.6		3.44667	0.091717
		2	26.51
		3	26.69
3	Cold3-OsSCL57-9h	1	26.45	26.36		3.20667	0.108317
		2	26.3
		3	26.33
1	Cold1-OsSCL57-12h	1	27.91	27.79		3.86	0.0688691
		2	27.75
		3	27.71
2	Cold2-OsSCL57-12h	1	26.73	26.67		2.74	0.149685
		2	26.67
		3	26.61
3	Cold3-OsSCL57-12h	1	27.42	27.36		3.43	0.0927827
		2	27.26
		3	27.4
1	Cold1-OsSCL57-24h	1	25.97	25.96		2.72	0.151774
		2	26.05
		3	25.86
2	Cold2-OsSCL57-24h	1	26.07	25.98		2.74	0.149685
		2	25.99
		3	25.88
3	Cold3-OsSCL57-24h	1	26.17	26.18		2.94	0.130308
		2	26.11
		3	26.26
1	Cold1-OsSCL57-48h	1	25.87	25.87		2.31333	0.201195
		2	25.85
		3	25.89
2	Cold2-OsSCL57-48h	1	25.91	25.9		2.34333	0.197055
		2	25.92
		3	25.87
3	Cold3-OsSCL57-48h	1	26.17	26.18		2.62333	0.162292
		2	26.08
		3	26.29
				1h	0.0904543	0.0792928	0.0879808
				2h	0.07966	0.076415	0.0865693
				4h	0.0642571	0.0780207	0.0717936
				6h	0.108067	0.100134	0.11908
				9h	0.0849839	0.091717	0.108317
				12h	0.0688691	0.149685	0.0927827
				24h	0.151774	0.149685	0.130308
				48h	0.201195	0.197055	0.162292

## Sheet: OsSCL28
qRT-PCR raw data for cold treatment of OsSCL28
Biological replicates	Sample Name	Technical replicates	Cq	Cq Mean (Technical replicates)	Cq Mean (Biological replicates)	ΔCq	2-ΔCq
1	Cold1-Actin-1h	1	23.76	23.85	23.3033
		2	23.92
		3	23.87
2	Cold2-Actin-1h	1	22.8	22.89	23.3033
		2	22.91
		3	22.96
3	Cold3-Actin-1h	1	23.13	23.17	23.3033
		2	23.3
		3	23.08
1	Cold1-Actin-2h	1	23.86	23.93	24.25
		2	24.03
		3	23.9
2	Cold2-Actin-2h	1	24.32	24.35	24.25
		2	24.42
		3	24.31
3	Cold3-Actin-2h	1	24.42	24.47	24.25
		2	24.43
		3	24.56
1	Cold1-Actin-4h	1	22.63	22.74	22.74
		2	22.74
		3	22.85
2	Cold2-Actin-4h	1	22.66	22.69	22.74
		2	22.66
		3	22.75
3	Cold3-Actin-4h	1	22.96	22.86	22.74
		2	22.77
		3	22.85
1	Cold1-Actin-6h	1	24.26	24.27	24.27
		2	24.39
		3	24.16
2	Cold2-Actin-6h	1	23.61	23.7	24.27
		2	23.7
		3	23.79
3	Cold3-Actin-6h	1	23.88	23.92	24.27
		2	23.89
		3	23.99
1	Cold1-Actin-9h	1	22.56	22.55	23.1533
		2	22.52
		3	22.57
2	Cold2-Actin-9h	1	23.25	23.3	23.1533
		2	23.22
		3	23.43
3	Cold3-Actin-9h	1	23.52	23.61	23.1533
		2	23.74
		3	23.57
1	Cold1-Actin-12h	1	23.93	23.93	23.93
		2	23.98
		3	23.88
2	Cold2-Actin-12h	1	24.34	24.32	23.93
		2	24.29
		3	24.33
3	Cold3-Actin-12h	1	23.63	23.65	23.93
		2	23.55
		3	23.77
1	Cold1-Actin-24h	1	23.27	23.24	23.24
		2	23.15
		3	23.3
2	Cold2-Actin-24h	1	23.41	23.49	23.24
		2	23.51
		3	23.55
3	Cold3-Actin-24h	1	23.16	23.24	23.24
		2	23.26
		3	23.3
1	Cold1-Actin-48h	1	23.51	23.53	23.5567
		2	23.5
		3	23.58
2	Cold2-Actin-48h	1	23.55	23.59	23.5567
		2	23.67
		3	23.55
3	Cold3-Actin-48h	1	23.57	23.55	23.5567
		2	23.59
		3	23.49
1	Cold1-OsSCL28-1h	1	25.83	25.79		2.48667	0.178418
		2	25.78
		3	25.76
2	Cold2-OsSCL28-1h	1	25.92	25.82		2.51667	0.174746
		2	25.81
		3	25.73
3	Cold3-OsSCL28-1h	1	25.83	25.86		2.55667	0.169968
		2	25.78
		3	25.97
1	Cold1-OsSCL28-2h	1	26.71	26.59		2.34	0.19751
		2	26.52
		3	26.54
2	Cold2-OsSCL28-2h	1	26.27	26.31		2.06	0.239816
		2	26.36
		3	26.3
3	Cold3-OsSCL28-2h	1	26.57	26.57		2.32	0.200267
		2	26.55
		3	26.59
1	Cold1-OsSCL28-4h	1	25.76	25.77		3.03	0.122428
		2	25.87
		3	25.68
2	Cold2-OsSCL28-4h	1	25.71	25.66		2.92	0.132127
		2	25.62
		3	25.65
3	Cold3-OsSCL28-4h	1	25.6	25.63		2.89	0.134904
		2	25.72
		3	25.57
1	Cold1-OsSCL28-6h	1	26.25	26.31		2.04	0.243164
		2	26.43
		3	26.25
2	Cold2-OsSCL28-6h	1	26.17	26.13		1.86	0.275476
		2	26.12
		3	26.1
3	Cold3-OsSCL28-6h	1	26.24	26.22		1.95	0.258816
		2	26.27
		3	26.15
1	Cold1-OsSCL28-9h	1	26.36	26.33		3.17667	0.110593
		2	26.36
		3	26.27
2	Cold2-OsSCL28-9h	1	25.9	25.8		2.64667	0.159689
		2	25.73
		3	25.77
3	Cold3-OsSCL28-9h	1	25.32	25.34		2.18667	0.219658
		2	25.38
		3	25.32
1	Cold1-OsSCL28-12h	1	26.55	26.45		2.52	0.174343
		2	26.4
		3	26.4
2	Cold2-OsSCL28-12h	1	27.39	27.38		3.45	0.0915054
		2	27.28
		3	27.47
3	Cold3-OsSCL28-12h	1	26.05	26.15		2.22	0.214641
		2	26.16
		3	26.24
1	Cold1-OsSCL28-24h	1	25.79	25.82		2.58	0.167241
		2	25.89
		3	25.78
2	Cold2-OsSCL28-24h	1	25.85	25.77		2.53	0.173139
		2	25.66
		3	25.8
3	Cold3-OsSCL28-24h	1	25.95	25.95		2.71	0.15283
		2	25.9
		3	26
1	Cold1-OsSCL28-48h	1	26.58	26.5		2.94333	0.130007
		2	26.48
		3	26.44
2	Cold2-OsSCL28-48h	1	26.79	26.7		3.14333	0.113178
		2	26.72
		3	26.59
3	Cold3-OsSCL28-48h	1	25.97	25.94		2.38333	0.191666
		2	25.84
		3	26.01
				1h	0.178418	0.174746	0.169968
				2h	0.19751	0.239816	0.200267
				4h	0.122428	0.132127	0.134904
				6h	0.243164	0.275476	0.258816
				9h	0.110593	0.159689	0.219658
				12h	0.174343	0.0915054	0.214641
				24h	0.167241	0.173139	0.15283
				48h	0.130007	0.113178	0.191666

## Sheet: OsSCL25
qRT-PCR raw data for cold treatment of OsSCL25
Biological replicates	Sample Name	Technical replicates	Cq	Cq Mean (Technical replicates)	Cq Mean (Biological replicates)	ΔCq	2-ΔCq
1	Cold1-Actin-1h	1	23.86	23.85	23.3033
		2	23.89
		3	23.8
2	Cold2-Actin-1h	1	22.9	22.89	23.3033
		2	23
		3	22.77
3	Cold3-Actin-1h	1	23.1	23.17	23.3033
		2	23.15
		3	23.26
1	Cold1-Actin-2h	1	23.96	23.93	24.25
		2	24
		3	23.83
2	Cold2-Actin-2h	1	24.35	24.35	24.25
		2	24.34
		3	24.36
3	Cold3-Actin-2h	1	24.39	24.47	24.25
		2	24.52
		3	24.5
1	Cold1-Actin-4h	1	22.82	22.74	22.74
		2	22.63
		3	22.77
2	Cold2-Actin-4h	1	22.69	22.69	22.74
		2	22.74
		3	22.64
3	Cold3-Actin-4h	1	22.83	22.86	22.74
		2	22.91
		3	22.84
1	Cold1-Actin-6h	1	24.27	24.27	24.27
		2	24.29
		3	24.25
2	Cold2-Actin-6h	1	23.77	23.7	24.27
		2	23.69
		3	23.64
3	Cold3-Actin-6h	1	23.91	23.92	24.27
		2	23.91
		3	23.94
1	Cold1-Actin-9h	1	22.61	22.55	23.1533
		2	22.51
		3	22.53
2	Cold2-Actin-9h	1	23.25	23.3	23.1533
		2	23.3
		3	23.35
3	Cold3-Actin-9h	1	23.51	23.61	23.1533
		2	23.61
		3	23.71
1	Cold1-Actin-12h	1	23.91	23.93	23.93
		2	24.04
		3	23.84
2	Cold2-Actin-12h	1	24.27	24.32	23.93
		2	24.24
		3	24.45
3	Cold3-Actin-12h	1	23.72	23.65	23.93
		2	23.62
		3	23.61
1	Cold1-Actin-24h	1	23.16	23.24	23.24
		2	23.19
		3	23.37
2	Cold2-Actin-24h	1	23.43	23.49	23.24
		2	23.44
		3	23.6
3	Cold3-Actin-24h	1	23.37	23.24	23.24
		2	23.13
		3	23.22
1	Cold1-Actin-48h	1	23.58	23.53	23.5567
		2	23.51
		3	23.5
2	Cold2-Actin-48h	1	23.61	23.59	23.5567
		2	23.65
		3	23.51
3	Cold3-Actin-48h	1	23.53	23.55	23.5567
		2	23.58
		3	23.54
1	Cold1-OsSCL25-1h	1	24.98	24.86		1.55667	0.339936
		2	24.75
		3	24.85
2	Cold2-OsSCL25-1h	1	25	24.91		1.60667	0.328356
		2	24.92
		3	24.81
3	Cold3-OsSCL25-1h	1	24.74	24.71		1.40667	0.377182
		2	24.6
		3	24.79
1	Cold1-OsSCL25-2h	1	24.78	24.84		0.59	0.664343
		2	24.96
		3	24.78
2	Cold2-OsSCL25-2h	1	24.95	24.92		0.67	0.628507
		2	24.85
		3	24.96
3	Cold3-OsSCL25-2h	1	25.34	25.34		1.09	0.469761
		2	25.41
		3	25.27
1	Cold1-OsSCL25-4h	1	25.14	25.19		2.45	0.183011
		2	25.19
		3	25.24
2	Cold2-OsSCL25-4h	1	25.39	25.5		2.76	0.147624
		2	25.61
		3	25.5
3	Cold3-OsSCL25-4h	1	25.01	24.98		2.24	0.211686
		2	25.06
		3	24.87
1	Cold1-OsSCL25-6h	1	25.52	25.52		1.25	0.420448
		2	25.53
		3	25.51
2	Cold2-OsSCL25-6h	1	25.57	25.55		1.28	0.411796
		2	25.47
		3	25.61
3	Cold3-OsSCL25-6h	1	25.27	25.34		1.07	0.476319
		2	25.32
		3	25.43
1	Cold1-OsSCL25-9h	1	25.18	25.17		2.01667	0.247129
		2	25.25
		3	25.08
2	Cold2-OsSCL25-9h	1	24.44	24.42		1.26667	0.415619
		2	24.49
		3	24.33
3	Cold3-OsSCL25-9h	1	25.14	25.17		2.01667	0.247129
		2	25.11
		3	25.26
1	Cold1-OsSCL25-12h	1	26.15	26.11		2.18	0.220676
		2	26.11
		3	26.07
2	Cold2-OsSCL25-12h	1	26.47	26.4		2.47	0.180491
		2	26.29
		3	26.44
3	Cold3-OsSCL25-12h	1	25.84	25.72		1.79	0.289172
		2	25.65
		3	25.67
1	Cold1-OsSCL25-24h	1	24.43	24.38		1.14	0.45376
		2	24.39
		3	24.32
2	Cold2-OsSCL25-24h	1	24.4	24.51		1.27	0.41466
		2	24.56
		3	24.57
3	Cold3-OsSCL25-24h	1	24.58	24.59		1.35	0.392292
		2	24.57
		3	24.62
1	Cold1-OsSCL25-48h	1	24.72	24.62		1.06333	0.478525
		2	24.55
		3	24.59
2	Cold2-OsSCL25-48h	1	24.9	24.79		1.23333	0.425334
		2	24.78
		3	24.69
3	Cold3-OsSCL25-48h	1	25.08	25.11		1.55333	0.340722
		2	25.06
		3	25.19
				1h	0.339936	0.328356	0.377182
				2h	0.664343	0.628507	0.469761
				4h	0.183011	0.147624	0.211686
				6h	0.420448	0.411796	0.476319
				9h	0.247129	0.415619	0.247129
				12h	0.220676	0.180491	0.289172
				24h	0.45376	0.41466	0.392292
				48h	0.478525	0.425334	0.340722

## Sheet: OsSCL26
qRT-PCR raw data for cold treatment of OsSCL26
Biological replicates	Sample Name	Technical replicates	Cq	Cq Mean (Technical replicates)	Cq Mean (Biological replicates)	ΔCq	2-ΔCq
1	Cold1-Actin-1h	1	23.95	23.85	23.3033
		2	23.82
		3	23.78
2	Cold2-Actin-1h	1	22.97	22.89	23.3033
		2	22.78
		3	22.92
3	Cold3-Actin-1h	1	23.15	23.17	23.3033
		2	23.19
		3	23.17
1	Cold1-Actin-2h	1	23.96	23.93	24.25
		2	23.83
		3	24
2	Cold2-Actin-2h	1	24.32	24.35	24.25
		2	24.4
		3	24.33
3	Cold3-Actin-2h	1	24.47	24.47	24.25
		2	24.45
		3	24.49
1	Cold1-Actin-4h	1	22.63	22.74	22.74
		2	22.77
		3	22.82
2	Cold2-Actin-4h	1	22.73	22.69	22.74
		2	22.67
		3	22.67
3	Cold3-Actin-4h	1	22.97	22.86	22.74
		2	22.8
		3	22.81
1	Cold1-Actin-6h	1	24.26	24.27	24.27
		2	24.22
		3	24.33
2	Cold2-Actin-6h	1	23.64	23.7	24.27
		2	23.8
		3	23.66
3	Cold3-Actin-6h	1	23.94	23.92	24.27
		2	23.88
		3	23.94
1	Cold1-Actin-9h	1	22.46	22.55	23.1533
		2	22.57
		3	22.62
2	Cold2-Actin-9h	1	23.22	23.3	23.1533
		2	23.3
		3	23.38
3	Cold3-Actin-9h	1	23.61	23.61	23.1533
		2	23.72
		3	23.5
1	Cold1-Actin-12h	1	24.03	23.93	23.93
		2	23.83
		3	23.93
2	Cold2-Actin-12h	1	24.45	24.32	23.93
		2	24.26
		3	24.25
3	Cold3-Actin-12h	1	23.69	23.65	23.93
		2	23.63
		3	23.63
1	Cold1-Actin-24h	1	23.31	23.24	23.24
		2	23.28
		3	23.13
2	Cold2-Actin-24h	1	23.46	23.49	23.24
		2	23.53
		3	23.48
3	Cold3-Actin-24h	1	23.36	23.24	23.24
		2	23.14
		3	23.22
1	Cold1-Actin-48h	1	23.55	23.53	23.5567
		2	23.44
		3	23.6
2	Cold2-Actin-48h	1	23.58	23.59	23.5567
		2	23.7
		3	23.49
3	Cold3-Actin-48h	1	23.48	23.55	23.5567
		2	23.67
		3	23.5
1	Cold1-OsSCL26-1h	1	27.51	27.41		4.10667	0.0580457
		2	27.41
		3	27.31
2	Cold2-OsSCL26-1h	1	27.25	27.12		3.81667	0.070969
		2	27.04
		3	27.07
3	Cold3-OsSCL26-1h	1	27.2	27.29		3.98667	0.0630803
		2	27.27
		3	27.4
1	Cold1-OsSCL26-2h	1	27.62	27.69		3.44	0.0921418
		2	27.81
		3	27.64
2	Cold2-OsSCL26-2h	1	27.75	27.79		3.54	0.0859714
		2	27.72
		3	27.9
3	Cold3-OsSCL26-2h	1	27.67	27.77		3.52	0.0871715
		2	27.79
		3	27.85
1	Cold1-OsSCL26-4h	1	27.56	27.57		4.83	0.0351581
		2	27.68
		3	27.47
2	Cold2-OsSCL26-4h	1	27.52	27.42		4.68	0.0390103
		2	27.36
		3	27.38
3	Cold3-OsSCL26-4h	1	27.24	27.32		4.58	0.0418102
		2	27.45
		3	27.27
1	Cold1-OsSCL26-6h	1	27.35	27.28		3.01	0.124137
		2	27.28
		3	27.21
2	Cold2-OsSCL26-6h	1	27.31	27.32		3.05	0.120742
		2	27.35
		3	27.3
3	Cold3-OsSCL26-6h	1	27.93	27.98		3.71	0.076415
		2	28.07
		3	27.94
1	Cold1-OsSCL26-9h	1	27.19	27.13		3.97667	0.0635191
		2	27.15
		3	27.05
2	Cold2-OsSCL26-9h	1	26.79	26.88		3.72667	0.0755373
		2	26.9
		3	26.95
3	Cold3-OsSCL26-9h	1	27.16	27.26		4.10667	0.0580457
		2	27.35
		3	27.27
1	Cold1-OsSCL26-12h	1	29.31	29.35		5.42	0.023357
		2	29.41
		3	29.33
2	Cold2-OsSCL26-12h	1	27.58	27.59		3.66	0.0791098
		2	27.63
		3	27.56
3	Cold3-OsSCL26-12h	1	28.95	28.83		4.9	0.0334929
		2	28.77
		3	28.77
1	Cold1-OsSCL26-24h	1	28.3	28.33		5.09	0.0293601
		2	28.4
		3	28.29
2	Cold2-OsSCL26-24h	1	28.3	28.24		5	0.03125
		2	28.2
		3	28.22
3	Cold3-OsSCL26-24h	1	28.17	28.18		4.94	0.0325771
		2	28.14
		3	28.23
1	Cold1-OsSCL26-48h	1	25.88	25.76		2.20333	0.217135
		2	25.75
		3	25.65
2	Cold2-OsSCL26-48h	1	25.09	25.18		1.62333	0.324585
		2	25.28
		3	25.17
3	Cold3-OsSCL26-48h	1	25.82	25.93		2.37333	0.192999
		2	26
		3	25.97
				1h	0.058046	0.070969	0.06308
				2h	0.092142	0.085971	0.087171
				4h	0.035158	0.03901	0.04181
				6h	0.124137	0.120742	0.076415
				9h	0.063519	0.075537	0.058046
				12h	0.023357	0.07911	0.033493
				24h	0.02936	0.03125	0.032577
				48h	0.217135	0.324585	0.192999

## Sheet: OsSC32
qRT-PCR raw data for cold treatment of OsSC32
Biological replicates	Sample Name	Technical replicates	Cq	Cq Mean (Technical replicates)	Cq Mean (Biological replicates)	ΔCq	2-ΔCq
1	Cold1-Actin-1h	1	23.8	23.85	23.3033
		2	23.87
		3	23.88
2	Cold2-Actin-1h	1	22.84	22.89	23.3033
		2	22.96
		3	22.87
3	Cold3-Actin-1h	1	23.14	23.17	23.3033
		2	23.14
		3	23.23
1	Cold1-Actin-2h	1	23.93	23.93	24.25
		2	24
		3	23.86
2	Cold2-Actin-2h	1	24.33	24.35	24.25
		2	24.46
		3	24.26
3	Cold3-Actin-2h	1	24.49	24.47	24.25
		2	24.37
		3	24.55
1	Cold1-Actin-4h	1	22.83	22.74	22.74
		2	22.67
		3	22.72
2	Cold2-Actin-4h	1	22.81	22.69	22.74
		2	22.65
		3	22.61
3	Cold3-Actin-4h	1	22.91	22.86	22.74
		2	22.88
		3	22.79
1	Cold1-Actin-6h	1	24.23	24.27	24.27
		2	24.19
		3	24.39
2	Cold2-Actin-6h	1	23.73	23.7	24.27
		2	23.64
		3	23.73
3	Cold3-Actin-6h	1	23.97	23.92	24.27
		2	23.84
		3	23.95
1	Cold1-Actin-9h	1	22.46	22.55	23.1533
		2	22.61
		3	22.58
2	Cold2-Actin-9h	1	23.41	23.3	23.1533
		2	23.22
		3	23.27
3	Cold3-Actin-9h	1	23.55	23.61	23.1533
		2	23.64
		3	23.64
1	Cold1-Actin-12h	1	23.85	23.93	23.93
		2	23.93
		3	24.01
2	Cold2-Actin-12h	1	24.29	24.32	23.93
		2	24.32
		3	24.35
3	Cold3-Actin-12h	1	23.64	23.65	23.93
		2	23.55
		3	23.76
1	Cold1-Actin-24h	1	23.22	23.24	23.24
		2	23.22
		3	23.28
2	Cold2-Actin-24h	1	23.45	23.49	23.24
		2	23.4
		3	23.62
3	Cold3-Actin-24h	1	23.25	23.24	23.24
		2	23.16
		3	23.31
1	Cold1-Actin-48h	1	23.48	23.53	23.5567
		2	23.52
		3	23.59
2	Cold2-Actin-48h	1	23.61	23.59	23.5567
		2	23.64
		3	23.52
3	Cold3-Actin-48h	1	23.56	23.55	23.5567
		2	23.49
		3	23.6
1	Cold1-OsSC32-1h	1	22.7	22.73		-0.573333	1.48796
		2	22.8
		3	22.69
2	Cold2-OsSC32-1h	1	22.78	22.66		-0.643333	1.56193
		2	22.57
		3	22.63
3	Cold3-OsSC32-1h	1	22.76	22.67		-0.633333	1.55114
		2	22.56
		3	22.69
1	Cold1-OsSC32-2h	1	23.34	23.44		-0.81	1.75321
		2	23.41
		3	23.57
2	Cold2-OsSC32-2h	1	23.44	23.38		-0.87	1.82766
		2	23.37
		3	23.33
3	Cold3-OsSC32-2h	1	22.85	22.92		-1.33	2.51403
		2	22.91
		3	23
1	Cold1-OsSC32-4h	1	23.28	23.25		0.51	0.702222
		2	23.33
		3	23.14
2	Cold2-OsSC32-4h	1	22.96	22.98		0.24	0.846745
		2	22.87
		3	23.11
3	Cold3-OsSC32-4h	1	23.06	23.11		0.37	0.773782
		2	23.2
		3	23.07
1	Cold1-OsSC32-6h	1	23.67	23.59		-0.68	1.60214
		2	23.56
		3	23.54
2	Cold2-OsSC32-6h	1	23.92	23.95		-0.32	1.24833
		2	23.89
		3	24.04
3	Cold3-OsSC32-6h	1	23.89	23.91		-0.36	1.28343
		2	23.98
		3	23.86
1	Cold1-OsSC32-9h	1	23.4	23.49		0.336667	0.791869
		2	23.58
		3	23.49
2	Cold2-OsSC32-9h	1	22.55	22.55		-0.603333	1.51922
		2	22.66
		3	22.44
3	Cold3-OsSC32-9h	1	23.39	23.29		0.136667	0.909618
		2	23.28
		3	23.2
1	Cold1-OsSC32-12h	1	22.54	22.6		-1.33	2.51403
		2	22.63
		3	22.63
2	Cold2-OsSC32-12h	1	22.93	22.96		-0.97	1.95884
		2	23
		3	22.95
3	Cold3-OsSC32-12h	1	23.19	23.29		-0.64	1.55833
		2	23.38
		3	23.3
1	Cold1-OsSC32-24h	1	23.38	23.33		0.09	0.939523
		2	23.24
		3	23.37
2	Cold2-OsSC32-24h	1	22.5	22.59		-0.65	1.56917
		2	22.64
		3	22.63
3	Cold3-OsSC32-24h	1	22.63	22.62		-0.62	1.53688
		2	22.71
		3	22.52
1	Cold1-OsSC32-48h	1	23.97	23.9		0.343333	0.788218
		2	23.92
		3	23.81
2	Cold2-OsSC32-48h	1	23.9	23.85		0.293333	0.816014
		2	23.89
		3	23.76
3	Cold3-OsSC32-48h	1	23.4	23.38		-0.176667	1.13027
		2	23.47
		3	23.27	1h	1.48796	1.56193	1.55114
				2h	1.75321	1.82766	2.51403
				4h	0.702222	0.846745	0.773782
				6h	1.60214	1.24833	1.28343
				9h	0.791869	1.51922	0.909618
				12h	2.51403	1.95884	1.55833
				24h	0.939523	1.56917	1.53688
				48h	0.788218	0.816014	1.13027

## Sheet: OsSC34
qRT-PCR raw data for cold treatment of OsSC34
Biological replicates	Sample Name	Technical replicates	Cq	Cq Mean (Technical replicates)	Cq Mean (Biological replicates)	ΔCq	2-ΔCq
1	Cold1-Actin-1h	1	23.74	23.85	23.3033
		2	23.95
		3	23.86
2	Cold2-Actin-1h	1	22.89	22.89	23.3033
		2	22.79
		3	22.99
3	Cold3-Actin-1h	1	23.15	23.17	23.3033
		2	23.12
		3	23.24
1	Cold1-Actin-2h	1	23.87	23.93	24.25
		2	23.88
		3	24.04
2	Cold2-Actin-2h	1	24.29	24.35	24.25
		2	24.38
		3	24.38
3	Cold3-Actin-2h	1	24.37	24.47	24.25
		2	24.52
		3	24.52
1	Cold1-Actin-4h	1	22.78	22.74	22.74
		2	22.71
		3	22.73
2	Cold2-Actin-4h	1	22.68	22.69	22.74
		2	22.8
		3	22.59
3	Cold3-Actin-4h	1	22.83	22.86	22.74
		2	22.83
		3	22.92
1	Cold1-Actin-6h	1	24.22	24.27	24.27
		2	24.25
		3	24.34
2	Cold2-Actin-6h	1	23.78	23.7	24.27
		2	23.67
		3	23.65
3	Cold3-Actin-6h	1	23.84	23.92	24.27
		2	23.89
		3	24.03
1	Cold1-Actin-9h	1	22.56	22.55	23.1533
		2	22.59
		3	22.5
2	Cold2-Actin-9h	1	23.28	23.3	23.1533
		2	23.32
		3	23.3
3	Cold3-Actin-9h	1	23.5	23.61	23.1533
		2	23.73
		3	23.6
1	Cold1-Actin-12h	1	23.86	23.93	23.93
		2	23.89
		3	24.04
2	Cold2-Actin-12h	1	24.29	24.32	23.93
		2	24.36
		3	24.31
3	Cold3-Actin-12h	1	23.76	23.65	23.93
		2	23.58
		3	23.61
1	Cold1-Actin-24h	1	23.28	23.24	23.24
		2	23.23
		3	23.21
2	Cold2-Actin-24h	1	23.49	23.49	23.24
		2	23.59
		3	23.39
3	Cold3-Actin-24h	1	23.15	23.24	23.24
		2	23.34
		3	23.23
1	Cold1-Actin-48h	1	23.53	23.53	23.5567
		2	23.51
		3	23.55
2	Cold2-Actin-48h	1	23.7	23.59	23.5567
		2	23.48
		3	23.59
3	Cold3-Actin-48h	1	23.54	23.55	23.5567
		2	23.52
		3	23.59
1	Cold1-OsSC34-1h	1	24.405	24.325		1.02167	0.492547
		2	24.265
		3	24.305
2	Cold2-OsSC34-1h	1	24.47	24.5		1.19667	0.436282
		2	24.62
		3	24.41
3	Cold3-OsSC34-1h	1	24.09	24.15		0.846667	0.556068
		2	24.13
		3	24.23
1	Cold1-OsSC34-2h	1	24.79	24.78		0.53	0.692555
		2	24.7
		3	24.85
2	Cold2-OsSC34-2h	1	25.01	24.98		0.73	0.602904
		2	24.92
		3	25.01
3	Cold3-OsSC34-2h	1	24.7	24.65		0.4	0.757858
		2	24.57
		3	24.68
1	Cold1-OsSC34-4h	1	22.99	22.97		0.23	0.852635
		2	22.97
		3	22.95
2	Cold2-OsSC34-4h	1	23.51	23.44		0.7	0.615572
		2	23.36
		3	23.45
3	Cold3-OsSC34-4h	1	23.69	23.64		0.9	0.535887
		2	23.7
		3	23.53
1	Cold1-OsSC34-6h	1	24.71	24.72		0.45	0.732043
		2	24.83
		3	24.62
2	Cold2-OsSC34-6h	1	24.61	24.61		0.34	0.790041
		2	24.7
		3	24.52
3	Cold3-OsSC34-6h	1	25.17	25.26		0.99	0.503478
		2	25.32
		3	25.29
1	Cold1-OsSC34-9h	1	24.68	24.76		1.60667	0.328356
		2	24.8
		3	24.8
2	Cold2-OsSC34-9h	1	24.84	24.72		1.56667	0.337587
		2	24.67
		3	24.65
3	Cold3-OsSC34-9h	1	24.58	24.47		1.31667	0.401461
		2	24.44
		3	24.39
1	Cold1-OsSC34-12h	1	25.81	25.87		1.94	0.260616
		2	25.92
		3	25.88
2	Cold2-OsSC34-12h	1	26.29	26.17		2.24	0.211686
		2	26.07
		3	26.15
3	Cold3-OsSC34-12h	1	25.77	25.78		1.85	0.277392
		2	25.72
		3	25.85
1	Cold1-OsSC34-24h	1	25.48	25.54		2.3	0.203063
		2	25.56
		3	25.58
2	Cold2-OsSC34-24h	1	25.18	25.23		1.99	0.251739
		2	25.2
		3	25.31
3	Cold3-OsSC34-24h	1	25.04	25.06		1.82	0.283221
		2	25.19
		3	24.95
1	Cold1-OsSC34-48h	1	25.04	24.97		1.41333	0.375443
		2	25
		3	24.87
2	Cold2-OsSC34-48h	1	24.79	24.76		1.20333	0.434271
		2	24.68
		3	24.81
3	Cold3-OsSC34-48h	1	24.61	24.66		1.10333	0.46544
		2	24.68
		3	24.69
				1h	0.492547	0.436282	0.556068
				2h	0.692555	0.602904	0.757858
				4h	0.852635	0.615572	0.535887
				6h	0.732043	0.790041	0.503478
				9h	0.328356	0.337587	0.401461
				12h	0.260616	0.211686	0.277392
				24h	0.203063	0.251739	0.283221
				48h	0.375443	0.434271	0.46544

## Sheet: OsSC25
qRT-PCR raw data for cold treatment of OsSC25
Biological replicates	Sample Name	Technical replicates	Cq	Cq Mean (Technical replicates)	Cq Mean (Biological replicates)	ΔCq	2-ΔCq
1	Cold1-Actin-1h	1	23.95	23.85	23.3033
		2	23.76
		3	23.84
2	Cold2-Actin-1h	1	22.99	22.89	23.3033
		2	22.84
		3	22.84
3	Cold3-Actin-1h	1	23.17	23.17	23.3033
		2	23.23
		3	23.11
1	Cold1-Actin-2h	1	23.87	23.93	24.25
		2	23.88
		3	24.04
2	Cold2-Actin-2h	1	24.4	24.35	24.25
		2	24.25
		3	24.4
3	Cold3-Actin-2h	1	24.47	24.47	24.25
		2	24.5
		3	24.44
1	Cold1-Actin-4h	1	22.85	22.74	22.74
		2	22.69
		3	22.68
2	Cold2-Actin-4h	1	22.8	22.69	22.74
		2	22.69
		3	22.58
3	Cold3-Actin-4h	1	22.88	22.86	22.74
		2	22.75
		3	22.95
1	Cold1-Actin-6h	1	24.31	24.27	24.27
		2	24.16
		3	24.34
2	Cold2-Actin-6h	1	23.75	23.7	24.27
		2	23.64
		3	23.71
3	Cold3-Actin-6h	1	23.89	23.92	24.27
		2	23.95
		3	23.92
1	Cold1-Actin-9h	1	22.46	22.55	23.1533
		2	22.51
		3	22.68
2	Cold2-Actin-9h	1	23.26	23.3	23.1533
		2	23.21
		3	23.43
3	Cold3-Actin-9h	1	23.66	23.61	23.1533
		2	23.6
		3	23.57
1	Cold1-Actin-12h	1	23.98	23.93	23.93
		2	23.88
		3	23.93
2	Cold2-Actin-12h	1	24.27	24.32	23.93
		2	24.28
		3	24.41
3	Cold3-Actin-12h	1	23.63	23.65	23.93
		2	23.65
		3	23.67
1	Cold1-Actin-24h	1	23.19	23.24	23.24
		2	23.35
		3	23.18
2	Cold2-Actin-24h	1	23.45	23.49	23.24
		2	23.59
		3	23.43
3	Cold3-Actin-24h	1	23.3	23.24	23.24
		2	23.15
		3	23.27
1	Cold1-Actin-48h	1	23.57	23.53	23.5567
		2	23.54
		3	23.48
2	Cold2-Actin-48h	1	23.56	23.59	23.5567
		2	23.61
		3	23.6
3	Cold3-Actin-48h	1	23.48	23.55	23.5567
		2	23.57
		3	23.6
1	Cold1-OsSC25-1h	1	26.8	26.71		3.40667	0.0942955
		2	26.69
		3	26.64
2	Cold2-OsSC25-1h	1	27.02	26.97		3.66667	0.0787451
		2	27
		3	26.89
3	Cold3-OsSC25-1h	1	26.84	26.94		3.63667	0.0803997
		2	27.07
		3	26.91
1	Cold1-OsSC25-2h	1	27.84	27.86		3.61	0.0818996
		2	27.79
		3	27.95
2	Cold2-OsSC25-2h	1	27.36	27.25		3	0.125
		2	27.16
		3	27.23
3	Cold3-OsSC25-2h	1	28.03	28.06		3.81	0.0712977
		2	27.99
		3	28.16
1	Cold1-OsSC25-4h	1	25.88	25.94		3.2	0.108819
		2	25.9
		3	26.04
2	Cold2-OsSC25-4h	1	26.71	26.63		3.89	0.0674518
		2	26.6
		3	26.58
3	Cold3-OsSC25-4h	1	25.85	25.87		3.13	0.114229
		2	25.97
		3	25.79
1	Cold1-OsSC25-6h	1	25.84	25.89		1.62	0.325335
		2	25.84
		3	25.99
2	Cold2-OsSC25-6h	1	25.9	25.87		1.6	0.329877
		2	25.86
		3	25.85
3	Cold3-OsSC25-6h	1	25.96	25.88		1.61	0.327598
		2	25.9
		3	25.78
1	Cold1-OsSC25-9h	1	28.91	29.02		5.86667	0.0171379
		2	29.06
		3	29.09
2	Cold2-OsSC25-9h	1	28.74	28.76		5.60667	0.0205223
		2	28.75
		3	28.79
3	Cold3-OsSC25-9h	1	28.54	28.59		5.43667	0.0230887
		2	28.56
		3	28.67
1	Cold1-OsSC25-12h	1	29.43	29.53		5.6	0.0206173
		2	29.52
		3	29.64
2	Cold2-OsSC25-12h	1	29.48	29.48		5.55	0.0213444
		2	29.49
		3	29.47
3	Cold3-OsSC25-12h	1	29.21	29.32		5.39	0.0238478
		2	29.43
		3	29.32
1	Cold1-OsSC25-24h	1	27.53	27.61		4.37	0.0483614
		2	27.65
		3	27.65
2	Cold2-OsSC25-24h	1	27.95	28		4.76	0.036906
		2	28.11
		3	27.94
3	Cold3-OsSC25-24h	1	27.44	27.51		4.27	0.0518325
		2	27.48
		3	27.61
1	Cold1-OsSC25-48h	1	27.11	27.05		3.49333	0.0887977
		2	27.04
		3	27
2	Cold2-OsSC25-48h	1	27.51	27.57		4.01333	0.061925
		2	27.65
		3	27.55
3	Cold3-OsSC25-48h	1	27.23	27.31		3.75333	0.0741539
		2	27.31
		3	27.39
				1h	0.0942955	0.0787451	0.0803997
				2h	0.0818996	0.125	0.0712977
				4h	0.108819	0.0674518	0.114229
				6h	0.325335	0.329877	0.327598
				9h	0.0171379	0.0205223	0.0230887
				12h	0.0206173	0.0213444	0.0238478
				24h	0.0483614	0.036906	0.0518325
				48h	0.0887977	0.061925	0.0741539

## Sheet: OsSR45a
qRT-PCR raw data for cold treatment of OsSR45a
Biological replicates	Sample Name	Technical replicates	Cq	Cq Mean (Technical replicates)	Cq Mean (Biological replicates)	ΔCq	2-ΔCq
1	Cold1-Actin-1h	1	23.8	23.85	23.3033
		2	23.82
		3	23.93
2	Cold2-Actin-1h	1	22.82	22.89	23.3033
		2	22.89
		3	22.96
3	Cold3-Actin-1h	1	23.18	23.17	23.3033
		2	23.07
		3	23.26
1	Cold1-Actin-2h	1	23.92	23.93	24.25
		2	23.9
		3	23.97
2	Cold2-Actin-2h	1	24.45	24.35	24.25
		2	24.27
		3	24.33
3	Cold3-Actin-2h	1	24.4	24.47	24.25
		2	24.45
		3	24.56
1	Cold1-Actin-4h	1	22.74	22.74	22.74
		2	22.72
		3	22.76
2	Cold2-Actin-4h	1	22.61	22.69	22.74
		2	22.82
		3	22.64
3	Cold3-Actin-4h	1	22.87	22.86	22.74
		2	22.93
		3	22.78
1	Cold1-Actin-6h	1	24.25	24.27	24.27
		2	24.37
		3	24.19
2	Cold2-Actin-6h	1	23.61	23.7	24.27
		2	23.68
		3	23.81
3	Cold3-Actin-6h	1	23.97	23.92	24.27
		2	23.88
		3	23.91
1	Cold1-Actin-9h	1	22.55	22.55	23.1533
		2	22.44
		3	22.66
2	Cold2-Actin-9h	1	23.36	23.3	23.1533
		2	23.22
		3	23.32
3	Cold3-Actin-9h	1	23.63	23.61	23.1533
		2	23.57
		3	23.63
1	Cold1-Actin-12h	1	24.02	23.93	23.93
		2	23.95
		3	23.82
2	Cold2-Actin-12h	1	24.33	24.32	23.93
		2	24.24
		3	24.39
3	Cold3-Actin-12h	1	23.74	23.65	23.93
		2	23.57
		3	23.64
1	Cold1-Actin-24h	1	23.22	23.24	23.24
		2	23.2
		3	23.3
2	Cold2-Actin-24h	1	23.42	23.49	23.24
		2	23.48
		3	23.57
3	Cold3-Actin-24h	1	23.18	23.24	23.24
		2	23.17
		3	23.37
1	Cold1-Actin-48h	1	23.46	23.53	23.5567
		2	23.64
		3	23.49
2	Cold2-Actin-48h	1	23.63	23.59	23.5567
		2	23.58
		3	23.56
3	Cold3-Actin-48h	1	23.45	23.55	23.5567
		2	23.64
		3	23.56
1	Cold1-OsSR45a-1h	1	18.28	18.31		-4.99333	31.8525
		2	18.29
		3	18.36
2	Cold2-OsSR45a-1h	1	18.66	18.62		-4.68333	25.6935
		2	18.69
		3	18.51
3	Cold3-OsSR45a-1h	1	18.92	18.97		-4.33333	20.1587
		2	18.94
		3	19.05
1	Cold1-OsSR45a-2h	1	19.27	19.32		-4.93	30.4844
		2	19.3
		3	19.39
2	Cold2-OsSR45a-2h	1	18.72	18.82		-5.43	43.1115
		2	18.89
		3	18.85
3	Cold3-OsSR45a-2h	1	18.67	18.6		-5.65	50.2134
		2	18.61
		3	18.52
1	Cold1-OsSR45a-4h	1	19.02	19.11		-3.63	12.3805
		2	19.2
		3	19.11
2	Cold2-OsSR45a-4h	1	18.97	18.98		-3.76	13.5479
		2	18.96
		3	19.01
3	Cold3-OsSR45a-4h	1	19.14	19.2		-3.54	11.6318
		2	19.15
		3	19.31
1	Cold1-OsSR45a-6h	1	19.24	19.2		-5.07	33.5909
		2	19.26
		3	19.1
2	Cold2-OsSR45a-6h	1	18.89	18.95		-5.32	39.9466
		2	18.98
		3	18.98
3	Cold3-OsSR45a-6h	1	18.71	18.63		-5.64	49.8665
		2	18.61
		3	18.57
1	Cold1-OsSR45a-9h	1	20.3	20.28		-2.87333	7.32756
		2	20.19
		3	20.35
2	Cold2-OsSR45a-9h	1	20.34	20.25		-2.90333	7.48153
		2	20.22
		3	20.19
3	Cold3-OsSR45a-9h	1	20.37	20.4		-2.75333	6.74273
		2	20.48
		3	20.35
1	Cold1-OsSR45a-12h	1	19.99	20.05		-3.88	14.723
		2	20.15
		3	20.01
2	Cold2-OsSR45a-12h	1	20.33	20.31		-3.62	12.295
		2	20.2
		3	20.4
3	Cold3-OsSR45a-12h	1	20.53	20.51		-3.42	10.7034
		2	20.59
		3	20.41
1	Cold1-OsSR45a-24h	1	20.26	20.37		-2.87	7.31065
		2	20.38
		3	20.47
2	Cold2-OsSR45a-24h	1	20.62	20.59		-2.65	6.27667
		2	20.55
		3	20.6
3	Cold3-OsSR45a-24h	1	20.57	20.57		-2.67	6.36429
		2	20.46
		3	20.68
1	Cold1-OsSR45a-48h	1	20.78	20.81		-2.74667	6.71165
		2	20.77
		3	20.88
2	Cold2-OsSR45a-48h	1	20.52	20.59		-2.96667	7.81728
		2	20.69
		3	20.56
3	Cold3-OsSR45a-48h	1	20.47	20.45		-3.10667	8.6139
		2	20.39
		3	20.49
					1h	31.8525	25.6935	20.1587
					2h	30.4844	43.1115	50.2134
					4h	12.3805	13.5479	11.6318
					6h	33.5909	39.9466	49.8665
					9h	7.32756	7.48153	6.74273
					12h	14.723	12.295	10.7034
					24h	7.31065	6.27667	6.36429
					48h	6.71165	7.81728	8.6139

[truncated: 14 more sheets: OsSR45, OsRS2Z39, OsRS2Z37, OsRS2Z36, OsRS2Z38, OsRSZ21a, OsRSZ21, OsRSZ23, OsRS29, OsRS33, OsSR33, OsSR32, OsSR33a, OsSR40]
