# Supplementary material for: Comprehensive study of serine/arginine-rich (SR) gene family in rice: characterization, evolution and expression analysis
Source: PeerJ journal article supplement (doi:10.7717/peerj.16193), 2023-10-13
Supplement: qRTPCR_raw_dataTableS9S16.zip [file Supplemental Table_S14.xlsx]

## Sheet: OsSCL30a
qRT-PCR raw data for heat treatment of OsSCL30a
Biological replicates	Sample Name	Technical replicates	Cq	Cq Mean (Technical replicates)	Cq Mean (Biological replicates)	ΔCq	2-ΔCq
1	Heat1-Actin-1h	1	23.33	23.26	22.8233
		2	23.15
		3	23.3
2	Heat2-Actin-1h	1	22.63	22.7	22.8233
		2	22.76
		3	22.71
3	Heat3-Actin-1h	1	22.45	22.51	22.8233
		2	22.58
		3	22.5
1	Heat1-Actin-2h	1	23.37	23.35	23.3733
		2	23.26
		3	23.42
2	Heat2-Actin-2h	1	23.84	23.85	23.3733
		2	23.9
		3	23.81
3	Heat3-Actin-2h	1	22.95	22.92	23.3733
		2	22.94
		3	22.87
1	Heat1-Actin-4h	1	23.63	23.62	23.62
		2	23.55
		3	23.68
2	Heat2-Actin-4h	1	23.39	23.39	23.62
		2	23.3
		3	23.48
3	Heat3-Actin-4h	1	22.81	22.77	23.62
		2	22.73
		3	22.77
1	Heat1-Actin-6h	1	23.47	23.53	23.53
		2	23.48
		3	23.64
2	Heat2-Actin-6h	1	23.3	23.28	23.53
		2	23.24
		3	23.3
3	Heat3-Actin-6h	1	23.31	23.18	23.53
		2	23.14
		3	23.09
1	Heat1-Actin-9h	1	23.37	23.39	22.9067
		2	23.44
		3	23.36
2	Heat2-Actin-9h	1	22.58	22.52	22.9067
		2	22.51
		3	22.47
3	Heat3-Actin-9h	1	22.81	22.81	22.9067
		2	22.89
		3	22.73
1	Heat1-Actin-12h	1	22.8	22.85	22.85
		2	22.87
		3	22.88
2	Heat2-Actin-12h	1	21.99	21.97	22.85
		2	21.95
		3	21.97
3	Heat3-Actin-12h	1	22.78	22.75	22.85
		2	22.64
		3	22.83
1	Heat1-Actin-24h	1	22.32	22.39	22.39
		2	22.5
		3	22.35
2	Heat2-Actin-24h	1	22.37	22.45	22.39
		2	22.47
		3	22.51
3	Heat3-Actin-24h	1	21.7	21.71	22.39
		2	21.71
		3	21.72
1	Heat1-Actin-48h	1	20.66	20.55	20.96
		2	20.54
		3	20.45
2	Heat2-Actin-48h	1	20.51	20.56	20.96
		2	20.65
		3	20.52
3	Heat3-Actin-48h	1	21.69	21.77	20.96
		2	21.73
		3	21.89
1	Heat1-OsSCL30a-1h	1	27.31	27.36		4.53667	0.0430851
		2	27.43
		3	27.34
2	Heat2-OsSCL30a-1h	1	26.94	27		4.17667	0.0552966
		2	27.08
		3	26.98
3	Heat3-OsSCL30a-1h	1	27.49	27.53		4.70667	0.0382959
		2	27.46
		3	27.64
1	Heat1-OsSCL30a-2h	1	28.25	28.24		4.86667	0.0342758
		2	28.19
		3	28.28
2	Heat2-OsSCL30a-2h	1	28.46	28.49		5.11667	0.0288224
		2	28.53
		3	28.48
3	Heat3-OsSCL30a-2h	1	28.65	28.62		5.24667	0.0263388
		2	28.68
		3	28.53
1	Heat1-OsSCL30a-4h	1	28.53	28.5		4.88	0.0339605
		2	28.52
		3	28.45
2	Heat2-OsSCL30a-4h	1	28.41	28.38		4.76	0.036906
		2	28.32
		3	28.41
3	Heat3-OsSCL30a-4h	1	28.6	28.56		4.94	0.0325771
		2	28.49
		3	28.59
1	Heat1-OsSCL30a-6h	1	28.25	28.34		4.81	0.0356489
		2	28.35
		3	28.42
2	Heat2-OsSCL30a-6h	1	28.37	28.4		4.87	0.0341967
		2	28.43
		3	28.4
3	Heat3-OsSCL30a-6h	1	28.33	28.28		4.75	0.0371627
		2	28.25
		3	28.26
1	Heat1-OsSCL30a-9h	1	28.81	28.69		5.78333	0.018157
		2	28.58
		3	28.68
2	Heat2-OsSCL30a-9h	1	29.56	29.47		6.56333	0.010574
		2	29.45
		3	29.4
3	Heat3-OsSCL30a-9h	1	29.5	29.57		6.66333	0.0098659
		2	29.57
		3	29.64
1	Heat1-OsSCL30a-12h	1	28.22	28.27		5.42	0.023357
		2	28.31
		3	28.28
2	Heat2-OsSCL30a-12h	1	28.49	28.54		5.69	0.0193704
		2	28.55
		3	28.58
3	Heat3-OsSCL30a-12h	1	28.84	28.85		6	0.015625
		2	28.74
		3	28.97
1	Heat1-OsSCL30a-24h	1	28.15	28.15		5.76	0.018453
		2	28.1
		3	28.2
2	Heat2-OsSCL30a-24h	1	28.63	28.6		6.21	0.0135084
		2	28.52
		3	28.65
3	Heat3-OsSCL30a-24h	1	28.5	28.51		6.12	0.0143779
		2	28.42
		3	28.61
1	Heat1-OsSCL30a-48h	1	28.46	28.46		7.5	0.00552427
		2	28.45
		3	28.47
2	Heat2-OsSCL30a-48h	1	28.02	27.92		6.96	0.00803214
		2	27.92
		3	27.82
3	Heat3-OsSCL30a-48h	1	28.01	27.97		7.01	0.00775854
		2	27.92
		3	27.98

## Sheet: OsSCL30
qRT-PCR raw data for heat treatment of OsSCL30
Biological replicates	Sample Name	Technical replicates	Cq	Cq Mean (Technical replicates)	Cq Mean (Biological replicates)	ΔCq	2-ΔCq
1	Heat1-Actin-1h	1	23.24	23.26	22.8233
		2	23.2
		3	23.34
2	Heat2-Actin-1h	1	22.57	22.7	22.8233
		2	22.81
		3	22.72
3	Heat3-Actin-1h	1	22.46	22.51	22.8233
		2	22.54
		3	22.53
1	Heat1-Actin-2h	1	23.35	23.35	23.3733
		2	23.39
		3	23.31
2	Heat2-Actin-2h	1	23.85	23.85	23.3733
		2	23.86
		3	23.84
3	Heat3-Actin-2h	1	22.84	22.92	23.3733
		2	23.05
		3	22.87
1	Heat1-Actin-4h	1	23.56	23.62	23.62
		2	23.65
		3	23.65
2	Heat2-Actin-4h	1	23.33	23.39	23.62
		2	23.52
		3	23.32
3	Heat3-Actin-4h	1	22.81	22.77	23.62
		2	22.77
		3	22.73
1	Heat1-Actin-6h	1	23.42	23.53	23.53
		2	23.53
		3	23.64
2	Heat2-Actin-6h	1	23.33	23.28	23.53
		2	23.17
		3	23.34
3	Heat3-Actin-6h	1	23.29	23.18	23.53
		2	23.18
		3	23.07
1	Heat1-Actin-9h	1	23.38	23.39	22.9067
		2	23.37
		3	23.42
2	Heat2-Actin-9h	1	22.48	22.52	22.9067
		2	22.57
		3	22.51
3	Heat3-Actin-9h	1	22.71	22.81	22.9067
		2	22.87
		3	22.85
1	Heat1-Actin-12h	1	22.91	22.85	22.85
		2	22.88
		3	22.76
2	Heat2-Actin-12h	1	21.94	21.97	22.85
		2	22.07
		3	21.9
3	Heat3-Actin-12h	1	22.82	22.75	22.85
		2	22.76
		3	22.67
1	Heat1-Actin-24h	1	22.32	22.39	22.39
		2	22.43
		3	22.42
2	Heat2-Actin-24h	1	22.53	22.45	22.39
		2	22.44
		3	22.38
3	Heat3-Actin-24h	1	21.69	21.71	22.39
		2	21.7
		3	21.74
1	Heat1-Actin-48h	1	20.56	20.55	20.96
		2	20.52
		3	20.57
2	Heat2-Actin-48h	1	20.53	20.56	20.96
		2	20.61
		3	20.54
3	Heat3-Actin-48h	1	21.73	21.77	20.96
		2	21.71
		3	21.87
1	Heat1-OsSCL30-1h	1	28.8	28.76		5.5	0.0220971
		2	28.82
		3	28.66
2	Heat2-OsSCL30-1h	1	28.66	28.74		5.48	0.0224056
		2	28.7
		3	28.86
3	Heat3-OsSCL30-1h	1	28.43	28.46		5.2	0.0272047
		2	28.58
		3	28.37
1	Heat1-OsSCL30-2h	1	28.08	27.96		4.11	0.0579118
		2	27.92
		3	27.88
2	Heat2-OsSCL30-2h	1	28.33	28.21		4.36	0.0486978
		2	28.11
		3	28.19
3	Heat3-OsSCL30-2h	1	28.39	28.38		4.53	0.0432847
		2	28.35
		3	28.4
1	Heat1-OsSCL30-4h	1	28.34	28.35		4.96	0.0321286
		2	28.3
		3	28.41
2	Heat2-OsSCL30-4h	1	28.82	28.76		5.37	0.0241807
		2	28.69
		3	28.77
3	Heat3-OsSCL30-4h	1	29.22	29.2		5.81	0.0178244
		2	29.21
		3	29.17
1	Heat1-OsSCL30-6h	1	28.71	28.82		5.29	0.0255594
		2	28.88
		3	28.87
2	Heat2-OsSCL30-6h	1	28.4	28.35		4.82	0.0354026
		2	28.26
		3	28.39
3	Heat3-OsSCL30-6h	1	29	28.99		5.46	0.0227183
		2	28.93
		3	29.04
1	Heat1-OsSCL30-9h	1	27.77	27.84		5.32	0.0250334
		2	27.82
		3	27.93
2	Heat2-OsSCL30-9h	1	28.29	28.37		5.85	0.017337
		2	28.5
		3	28.32
3	Heat3-OsSCL30-9h	1	28.39	28.28		5.76	0.018453
		2	28.2
		3	28.25
1	Heat1-OsSCL30-12h	1	27.9	27.98		5.23	0.0266448
		2	28.06
		3	27.98
2	Heat2-OsSCL30-12h	1	28.59	28.46		5.71	0.0191038
		2	28.37
		3	28.42
3	Heat3-OsSCL30-12h	1	28.05	27.97		5.22	0.0268302
		2	27.88
		3	27.98
1	Heat1-OsSCL30-24h	1	28.37	28.34		5.89	0.0168629
		2	28.25
		3	28.4
2	Heat2-OsSCL30-24h	1	28.51	28.52		6.07	0.014885
		2	28.54
		3	28.51
3	Heat3-OsSCL30-24h	1	27.68	27.59		5.14	0.02836
		2	27.57
		3	27.52
1	Heat1-OsSCL30-48h	1	28.16	28.15		7.6	0.00515433
		2	28.17
		3	28.12
2	Heat2-OsSCL30-48h	1	27.98	27.87		7.32	0.00625836
		2	27.8
		3	27.83
3	Heat3-OsSCL30-48h	1	27.37	27.41		6.86	0.00860863
		2	27.51
		3	27.35	0.0220971		0.0272047

## Sheet: OsSCL57
qRT-PCR raw data for heat treatment of OsSCL57
Biological replicates	Sample Name	Technical replicates	Cq	Cq Mean (Technical replicates)	Cq Mean (Biological replicates)	ΔCq	2-ΔCq
1	Heat1-Actin-1h	1	23.3	23.26	22.8233
		2	23.24
		3	23.24
2	Heat2-Actin-1h	1	22.67	22.7	22.8233
		2	22.67
		3	22.76
3	Heat3-Actin-1h	1	22.61	22.51	22.8233
		2	22.49
		3	22.43
1	Heat1-Actin-2h	1	23.3	23.35	23.3733
		2	23.27
		3	23.48
2	Heat2-Actin-2h	1	23.75	23.85	23.3733
		2	23.84
		3	23.96
3	Heat3-Actin-2h	1	22.93	22.92	23.3733
		2	23
		3	22.83
1	Heat1-Actin-4h	1	23.69	23.62	23.62
		2	23.51
		3	23.66
2	Heat2-Actin-4h	1	23.29	23.39	23.62
		2	23.37
		3	23.51
3	Heat3-Actin-4h	1	22.85	22.77	23.62
		2	22.72
		3	22.74
1	Heat1-Actin-6h	1	23.45	23.53	23.53
		2	23.59
		3	23.55
2	Heat2-Actin-6h	1	23.4	23.28	23.53
		2	23.24
		3	23.2
3	Heat3-Actin-6h	1	23.19	23.18	23.53
		2	23.14
		3	23.21
1	Heat1-Actin-9h	1	23.39	23.39	22.9067
		2	23.46
		3	23.32
2	Heat2-Actin-9h	1	22.57	22.52	22.9067
		2	22.56
		3	22.43
3	Heat3-Actin-9h	1	22.9	22.81	22.9067
		2	22.75
		3	22.78
1	Heat1-Actin-12h	1	22.75	22.85	22.85
		2	22.98
		3	22.82
2	Heat2-Actin-12h	1	21.88	21.97	22.85
		2	21.99
		3	22.04
3	Heat3-Actin-12h	1	22.71	22.75	22.85
		2	22.73
		3	22.81
1	Heat1-Actin-24h	1	22.37	22.39	22.39
		2	22.42
		3	22.38
2	Heat2-Actin-24h	1	22.46	22.45	22.39
		2	22.42
		3	22.47
3	Heat3-Actin-24h	1	21.78	21.71	22.39
		2	21.73
		3	21.62
1	Heat1-Actin-48h	1	20.51	20.55	20.96
		2	20.54
		3	20.6
2	Heat2-Actin-48h	1	20.69	20.56	20.96
		2	20.49
		3	20.5
3	Heat3-Actin-48h	1	21.77	21.77	20.96
		2	21.74
		3	21.8
1	Heat1-OsSCL57-1h	1	26.64	26.66		3.83667	0.069992
		2	26.58
		3	26.76
2	Heat2-OsSCL57-1h	1	26.85	26.75		3.92667	0.0657591
		2	26.72
		3	26.68
3	Heat3-OsSCL57-1h	1	26.5	26.49		3.66667	0.0787451
		2	26.56
		3	26.41
1	Heat1-OsSCL57-2h	1	25.61	25.59		2.21667	0.215138
		2	25.62
		3	25.54
2	Heat2-OsSCL57-2h	1	25.53	25.58		2.20667	0.216634
		2	25.67
		3	25.54
3	Heat3-OsSCL57-2h	1	25.6	25.54		2.16667	0.222725
		2	25.52
		3	25.5
1	Heat1-OsSCL57-4h	1	25.5	25.38		1.76	0.295248
		2	25.29
		3	25.35
2	Heat2-OsSCL57-4h	1	25.77	25.71		2.09	0.234881
		2	25.64
		3	25.72
3	Heat3-OsSCL57-4h	1	25.45	25.43		1.81	0.285191
		2	25.51
		3	25.33
1	Heat1-OsSCL57-6h	1	25.64	25.63		2.1	0.233258
		2	25.63
		3	25.62
2	Heat2-OsSCL57-6h	1	25.38	25.26		1.73	0.301452
		2	25.18
		3	25.22
3	Heat3-OsSCL57-6h	1	25.37	25.38		1.85	0.277392
		2	25.29
		3	25.48
1	Heat1-OsSCL57-9h	1	24.47	24.49		1.58333	0.33371
		2	24.56
		3	24.44
2	Heat2-OsSCL57-9h	1	24.46	24.38		1.47333	0.360149
		2	24.27
		3	24.41
3	Heat3-OsSCL57-9h	1	24.49	24.4		1.49333	0.355191
		2	24.37
		3	24.34
1	Heat1-OsSCL57-12h	1	23.85	23.82		0.97	0.510506
		2	23.9
		3	23.71
2	Heat2-OsSCL57-12h	1	24.26	24.3		1.45	0.366021
		2	24.3
		3	24.34
3	Heat3-OsSCL57-12h	1	24.56	24.45		1.6	0.329877
		2	24.41
		3	24.38
1	Heat1-OsSCL57-24h	1	25.46	25.35		2.96	0.128514
		2	25.29
		3	25.3
2	Heat2-OsSCL57-24h	1	25.62	25.6		3.21	0.108067
		2	25.69
		3	25.49
3	Heat3-OsSCL57-24h	1	25.28	25.39		3	0.125
		2	25.48
		3	25.41
1	Heat1-OsSCL57-48h	1	25.2	25.31		4.35	0.0490365
		2	25.34
		3	25.39
2	Heat2-OsSCL57-48h	1	25.43	25.39		4.43	0.0463914
		2	25.36
		3	25.38
3	Heat3-OsSCL57-48h	1	25.51	25.44		4.48	0.0448111
		2	25.46
		3	25.35

## Sheet: OsSCL28
qRT-PCR raw data for heat treatment of OsSCL28
Biological replicates	Sample Name	Technical replicates	Cq	Cq Mean (Technical replicates)	Cq Mean (Biological replicates)	ΔCq	2-ΔCq
1	Heat1-Actin-1h	1	23.24	23.26	22.8233
		2	23.34
		3	23.2
2	Heat2-Actin-1h	1	22.74	22.7	22.8233
		2	22.74
		3	22.62
3	Heat3-Actin-1h	1	22.49	22.51	22.8233
		2	22.47
		3	22.57
1	Heat1-Actin-2h	1	23.39	23.35	23.3733
		2	23.42
		3	23.24
2	Heat2-Actin-2h	1	23.85	23.85	23.3733
		2	23.89
		3	23.81
3	Heat3-Actin-2h	1	23	22.92	23.3733
		2	22.95
		3	22.81
1	Heat1-Actin-4h	1	23.52	23.62	23.62
		2	23.66
		3	23.68
2	Heat2-Actin-4h	1	23.33	23.39	23.62
		2	23.49
		3	23.35
3	Heat3-Actin-4h	1	22.89	22.77	23.62
		2	22.67
		3	22.75
1	Heat1-Actin-6h	1	23.5	23.53	23.53
		2	23.46
		3	23.63
2	Heat2-Actin-6h	1	23.23	23.28	23.53
		2	23.31
		3	23.3
3	Heat3-Actin-6h	1	23.31	23.18	23.53
		2	23.16
		3	23.07
1	Heat1-Actin-9h	1	23.49	23.39	22.9067
		2	23.31
		3	23.37
2	Heat2-Actin-9h	1	22.54	22.52	22.9067
		2	22.42
		3	22.6
3	Heat3-Actin-9h	1	22.76	22.81	22.9067
		2	22.75
		3	22.92
1	Heat1-Actin-12h	1	22.97	22.85	22.85
		2	22.77
		3	22.81
2	Heat2-Actin-12h	1	21.95	21.97	22.85
		2	21.96
		3	22
3	Heat3-Actin-12h	1	22.71	22.75	22.85
		2	22.75
		3	22.79
1	Heat1-Actin-24h	1	22.52	22.39	22.39
		2	22.3
		3	22.35
2	Heat2-Actin-24h	1	22.53	22.45	22.39
		2	22.34
		3	22.48
3	Heat3-Actin-24h	1	21.74	21.71	22.39
		2	21.66
		3	21.73
1	Heat1-Actin-48h	1	20.55	20.55	20.96
		2	20.45
		3	20.65
2	Heat2-Actin-48h	1	20.56	20.56	20.96
		2	20.46
		3	20.66
3	Heat3-Actin-48h	1	21.87	21.77	20.96
		2	21.76
		3	21.68
1	Heat1-OsSCL28-1h	1	24.61	24.54		1.71667	0.304251
		2	24.54
		3	24.47
2	Heat2-OsSCL28-1h	1	24.69	24.62		1.79667	0.287839
		2	24.58
		3	24.59
3	Heat3-OsSCL28-1h	1	25.36	25.29		2.46667	0.180909
		2	25.32
		3	25.19
1	Heat1-OsSCL28-2h	1	24.81	24.82		1.44667	0.366868
		2	24.93
		3	24.72
2	Heat2-OsSCL28-2h	1	24.44	24.41		1.03667	0.487452
		2	24.31
		3	24.48
3	Heat3-OsSCL28-2h	1	24.5	24.52		1.14667	0.451668
		2	24.58
		3	24.48
1	Heat1-OsSCL28-4h	1	24.12	24.18		0.56	0.678302
		2	24.11
		3	24.31
2	Heat2-OsSCL28-4h	1	24.46	24.35		0.73	0.602904
		2	24.29
		3	24.3
3	Heat3-OsSCL28-4h	1	24.27	24.26		0.64	0.641713
		2	24.36
		3	24.15
1	Heat1-OsSCL28-6h	1	23.39	23.43		-0.1	1.07177
		2	23.37
		3	23.53
2	Heat2-OsSCL28-6h	1	23.6	23.65		0.12	0.920188
		2	23.65
		3	23.7
3	Heat3-OsSCL28-6h	1	23.51	23.45		-0.08	1.05702
		2	23.42
		3	23.42
1	Heat1-OsSCL28-9h	1	23.22	23.26		0.353333	0.782773
		2	23.34
		3	23.22
2	Heat2-OsSCL28-9h	1	23.44	23.47		0.563333	0.676737
		2	23.51
		3	23.46
3	Heat3-OsSCL28-9h	1	23.3	23.31		0.403333	0.756109
		2	23.22
		3	23.41
1	Heat1-OsSCL28-12h	1	23.94	23.96		1.11	0.463294
		2	23.9
		3	24.04
2	Heat2-OsSCL28-12h	1	23.13	23.24		0.39	0.76313
		2	23.28
		3	23.31
3	Heat3-OsSCL28-12h	1	23.83	23.71		0.86	0.550953
		2	23.63
		3	23.67
1	Heat1-OsSCL28-24h	1	23.74	23.84		1.45	0.366021
		2	23.93
		3	23.85
2	Heat2-OsSCL28-24h	1	24.25	24.23		1.84	0.279322
		2	24.28
		3	24.16
3	Heat3-OsSCL28-24h	1	24.13	24.18		1.79	0.289172
		2	24.29
		3	24.12
1	Heat1-OsSCL28-48h	1	23.62	23.49		2.53	0.173139
		2	23.39
		3	23.46
2	Heat2-OsSCL28-48h	1	22.68	22.56		1.6	0.329877
		2	22.46
		3	22.54
3	Heat3-OsSCL28-48h	1	23.25	23.35		2.39	0.190782
		2	23.36
		3	23.44

## Sheet: OsSCL25
qRT-PCR raw data for heat treatment of OsSCL25
Biological replicates	Sample Name	Technical replicates	Cq	Cq Mean (Technical replicates)	Cq Mean (Biological replicates)	ΔCq	2-ΔCq
1	Heat1-Actin-1h	1	23.28	23.26	22.8233
		2	23.28
		3	23.22
2	Heat2-Actin-1h	1	22.65	22.7	22.8233
		2	22.76
		3	22.69
3	Heat3-Actin-1h	1	22.49	22.51	22.8233
		2	22.46
		3	22.58
1	Heat1-Actin-2h	1	23.45	23.35	23.3733
		2	23.35
		3	23.25
2	Heat2-Actin-2h	1	23.8	23.85	23.3733
		2	23.77
		3	23.98
3	Heat3-Actin-2h	1	22.9	22.92	23.3733
		2	22.84
		3	23.02
1	Heat1-Actin-4h	1	23.6	23.62	23.62
		2	23.73
		3	23.53
2	Heat2-Actin-4h	1	23.4	23.39	23.62
		2	23.33
		3	23.44
3	Heat3-Actin-4h	1	22.81	22.77	23.62
		2	22.8
		3	22.7
1	Heat1-Actin-6h	1	23.58	23.53	23.53
		2	23.43
		3	23.58
2	Heat2-Actin-6h	1	23.32	23.28	23.53
		2	23.32
		3	23.2
3	Heat3-Actin-6h	1	23.16	23.18	23.53
		2	23.16
		3	23.22
1	Heat1-Actin-9h	1	23.31	23.39	22.9067
		2	23.41
		3	23.45
2	Heat2-Actin-9h	1	22.48	22.52	22.9067
		2	22.48
		3	22.6
3	Heat3-Actin-9h	1	22.81	22.81	22.9067
		2	22.78
		3	22.84
1	Heat1-Actin-12h	1	22.98	22.85	22.85
		2	22.76
		3	22.81
2	Heat2-Actin-12h	1	22.04	21.97	22.85
		2	21.86
		3	22.01
3	Heat3-Actin-12h	1	22.77	22.75	22.85
		2	22.67
		3	22.81
1	Heat1-Actin-24h	1	22.4	22.39	22.39
		2	22.43
		3	22.34
2	Heat2-Actin-24h	1	22.4	22.45	22.39
		2	22.39
		3	22.56
3	Heat3-Actin-24h	1	21.62	21.71	22.39
		2	21.67
		3	21.84
1	Heat1-Actin-48h	1	20.49	20.55	20.96
		2	20.67
		3	20.49
2	Heat2-Actin-48h	1	20.63	20.56	20.96
		2	20.56
		3	20.49
3	Heat3-Actin-48h	1	21.76	21.77	20.96
		2	21.85
		3	21.7
1	Heat1-OsSCL25-1h	1	21.86	21.9		-0.923333	1.89649
		2	21.85
		3	21.99
2	Heat2-OsSCL25-1h	1	21.78	21.71		-1.11333	2.16345
		2	21.73
		3	21.62
3	Heat3-OsSCL25-1h	1	22.41	22.38		-0.443333	1.35974
		2	22.33
		3	22.4
1	Heat1-OsSCL25-2h	1	22.49	22.51		-0.863333	1.81924
		2	22.43
		3	22.61
2	Heat2-OsSCL25-2h	1	22.41	22.35		-1.02333	2.03261
		2	22.24
		3	22.4
3	Heat3-OsSCL25-2h	1	21.82	21.9		-1.47333	2.77663
		2	21.9
		3	21.98
1	Heat1-OsSCL25-4h	1	23.62	23.49		-0.13	1.09429
		2	23.45
		3	23.4
2	Heat2-OsSCL25-4h	1	23.61	23.67		0.05	0.965936
		2	23.65
		3	23.75
3	Heat3-OsSCL25-4h	1	23.37	23.32		-0.3	1.23114
		2	23.24
		3	23.35
1	Heat1-OsSCL25-6h	1	23.55	23.56		0.03	0.97942
		2	23.48
		3	23.65
2	Heat2-OsSCL25-6h	1	23.93	23.87		0.34	0.790041
		2	23.78
		3	23.9
3	Heat3-OsSCL25-6h	1	23.59	23.59		0.06	0.959264
		2	23.66
		3	23.52
1	Heat1-OsSCL25-9h	1	22.41	22.37		-0.536667	1.45062
		2	22.41
		3	22.29
2	Heat2-OsSCL25-9h	1	22.53	22.51		-0.396667	1.31646
		2	22.5
		3	22.5
3	Heat3-OsSCL25-9h	1	22.46	22.53		-0.376667	1.29834
		2	22.66
		3	22.47
1	Heat1-OsSCL25-12h	1	23.6	23.54		0.69	0.619854
		2	23.59
		3	23.43
2	Heat2-OsSCL25-12h	1	23.42	23.49		0.64	0.641713
		2	23.43
		3	23.62
3	Heat3-OsSCL25-12h	1	23.09	22.97		0.12	0.920188
		2	22.89
		3	22.93
1	Heat1-OsSCL25-24h	1	21.87	21.75		-0.64	1.55833
		2	21.74
		3	21.64
2	Heat2-OsSCL25-24h	1	22.58	22.56		0.17	0.888843
		2	22.56
		3	22.54
3	Heat3-OsSCL25-24h	1	22.49	22.54		0.15	0.90125
		2	22.47
		3	22.66
1	Heat1-OsSCL25-48h	1	19.93	19.87		-1.09	2.12874
		2	19.8
		3	19.88
2	Heat2-OsSCL25-48h	1	19.99	19.92		-1.04	2.05623
		2	19.88
		3	19.89
3	Heat3-OsSCL25-48h	1	20.3	20.19		-0.77	1.70527
		2	20.18
		3	20.09	1h		2.16345	1.35974

## Sheet: OsSCL26
qRT-PCR raw data for heat treatment of OsSCL26
Biological replicates	Sample Name	Technical replicates	Cq	Cq Mean (Technical replicates)	Cq Mean (Biological replicates)	ΔCq	2-ΔCq
1	Heat1-Actin-1h	1	23.17	23.26	22.8233
		2	23.3
		3	23.31
2	Heat2-Actin-1h	1	22.74	22.7	22.8233
		2	22.78
		3	22.58
3	Heat3-Actin-1h	1	22.43	22.51	22.8233
		2	22.49
		3	22.61
1	Heat1-Actin-2h	1	23.26	23.35	23.3733
		2	23.47
		3	23.32
2	Heat2-Actin-2h	1	23.76	23.85	23.3733
		2	23.81
		3	23.98
3	Heat3-Actin-2h	1	22.84	22.92	23.3733
		2	22.87
		3	23.05
1	Heat1-Actin-4h	1	23.66	23.62	23.62
		2	23.53
		3	23.67
2	Heat2-Actin-4h	1	23.29	23.39	23.62
		2	23.46
		3	23.42
3	Heat3-Actin-4h	1	22.85	22.77	23.62
		2	22.76
		3	22.7
1	Heat1-Actin-6h	1	23.51	23.53	23.53
		2	23.47
		3	23.61
2	Heat2-Actin-6h	1	23.25	23.28	23.53
		2	23.21
		3	23.38
3	Heat3-Actin-6h	1	23.18	23.18	23.53
		2	23.21
		3	23.15
1	Heat1-Actin-9h	1	23.48	23.39	22.9067
		2	23.33
		3	23.36
2	Heat2-Actin-9h	1	22.63	22.52	22.9067
		2	22.5
		3	22.43
3	Heat3-Actin-9h	1	22.78	22.81	22.9067
		2	22.82
		3	22.83
1	Heat1-Actin-12h	1	22.88	22.85	22.85
		2	22.75
		3	22.92
2	Heat2-Actin-12h	1	22.07	21.97	22.85
		2	21.96
		3	21.88
3	Heat3-Actin-12h	1	22.64	22.75	22.85
		2	22.77
		3	22.84
1	Heat1-Actin-24h	1	22.51	22.39	22.39
		2	22.36
		3	22.3
2	Heat2-Actin-24h	1	22.51	22.45	22.39
		2	22.34
		3	22.5
3	Heat3-Actin-24h	1	21.68	21.71	22.39
		2	21.66
		3	21.79
1	Heat1-Actin-48h	1	20.5	20.55	20.96
		2	20.65
		3	20.5
2	Heat2-Actin-48h	1	20.63	20.56	20.96
		2	20.55
		3	20.5
3	Heat3-Actin-48h	1	21.72	21.77	20.96
		2	21.89
		3	21.7
1	Heat1-OsSCL26-1h	1	34.56	34.66		11.8367	0.000273406
		2	34.78
		3	34.64
2	Heat2-OsSCL26-1h	1	34.92	34.83		12.0067	0.000243015
		2	34.83
		3	34.74
3	Heat3-OsSCL26-1h	1	35.31	35.34		12.5167	0.000170651
		2	35.43
		3	35.28
1	Heat1-OsSCL26-2h	1	35.96	35.87		12.4967	0.000173033
		2	35.85
		3	35.8
2	Heat2-OsSCL26-2h	1	35.36	35.46		12.0867	0.000229906
		2	35.51
		3	35.51
3	Heat3-OsSCL26-2h	1	35.45	35.38		12.0067	0.000243015
		2	35.35
		3	35.34
1	Heat1-OsSCL26-4h	1	36.5	36.5		12.88	0.000132658
		2	36.4
		3	36.6
2	Heat2-OsSCL26-4h	1	36.93	36.95		13.33	9.71114e-05
		2	37.03
		3	36.89
3	Heat3-OsSCL26-4h	1	36.74	36.77		13.15	0.000110016
		2	36.87
		3	36.7
1	Heat1-OsSCL26-6h	1	35.34	35.33		11.8	0.000280444
		2	35.26
		3	35.39
2	Heat2-OsSCL26-6h	1	35.75	35.74		12.21	0.000211069
		2	35.7
		3	35.77
3	Heat3-OsSCL26-6h	1	35.74	35.71		12.18	0.000215504
		2	35.77
		3	35.62
1	Heat1-OsSCL26-9h	1	33.82	33.87		10.9633	0.00050085
		2	33.8
		3	33.99
2	Heat2-OsSCL26-9h	1	33.15	33.15		10.2433	0.000824991
		2	33.12
		3	33.18
3	Heat3-OsSCL26-9h	1	33.7	33.57		10.6633	0.000616619
		2	33.55
		3	33.46
1	Heat1-OsSCL26-12h	1	35.7	35.7		12.85	0.000135445
		2	35.6
		3	35.8
2	Heat2-OsSCL26-12h	1	36.53	36.55		13.7	7.51431e-05
		2	36.62
		3	36.5
3	Heat3-OsSCL26-12h	1	34.99	34.94		12.09	0.000229376
		2	34.95
		3	34.88
1	Heat1-OsSCL26-24h	1	35.1	35.13		12.74	0.000146177
		2	35.08
		3	35.21
2	Heat2-OsSCL26-24h	1	36.11	36.17		13.78	7.10897e-05
		2	36.22
		3	36.18
3	Heat3-OsSCL26-24h	1	34.87	34.79		12.4	0.000185024
		2	34.81
		3	34.69
1	Heat1-OsSCL26-48h	1	32.87	32.89		11.93	0.000256278
		2	32.84
		3	32.96
2	Heat2-OsSCL26-48h	1	33.19	33.24		12.28	0.000201072
		2	33.24
		3	33.29
3	Heat3-OsSCL26-48h	1	33.28	33.15		12.19	0.000214015
		2	33.1
		3	33.07	0.000273406		0.000170651

## Sheet: OsSC32
qRT-PCR raw data for heat treatment of OsSC32
Biological replicates	Sample Name	Technical replicates	Cq	Cq Mean (Technical replicates)	Cq Mean (Biological replicates)	ΔCq	2-ΔCq
1	Heat1-Actin-1h	1	23.28	23.26	22.8233
		2	23.33
		3	23.17
2	Heat2-Actin-1h	1	22.71	22.7	22.8233
		2	22.64
		3	22.75
3	Heat3-Actin-1h	1	22.6	22.51	22.8233
		2	22.52
		3	22.41
1	Heat1-Actin-2h	1	23.31	23.35	23.3733
		2	23.33
		3	23.41
2	Heat2-Actin-2h	1	23.98	23.85	23.3733
		2	23.74
		3	23.83
3	Heat3-Actin-2h	1	22.97	22.92	23.3733
		2	22.81
		3	22.98
1	Heat1-Actin-4h	1	23.62	23.62	23.62
		2	23.62
		3	23.62
2	Heat2-Actin-4h	1	23.4	23.39	23.62
		2	23.44
		3	23.33
3	Heat3-Actin-4h	1	22.71	22.77	23.62
		2	22.79
		3	22.81
1	Heat1-Actin-6h	1	23.53	23.53	23.53
		2	23.49
		3	23.57
2	Heat2-Actin-6h	1	23.33	23.28	23.53
		2	23.33
		3	23.18
3	Heat3-Actin-6h	1	23.17	23.18	23.53
		2	23.15
		3	23.22
1	Heat1-Actin-9h	1	23.28	23.39	22.9067
		2	23.37
		3	23.52
2	Heat2-Actin-9h	1	22.59	22.52	22.9067
		2	22.52
		3	22.45
3	Heat3-Actin-9h	1	22.74	22.81	22.9067
		2	22.88
		3	22.81
1	Heat1-Actin-12h	1	22.9	22.85	22.85
		2	22.79
		3	22.86
2	Heat2-Actin-12h	1	21.92	21.97	22.85
		2	22.06
		3	21.93
3	Heat3-Actin-12h	1	22.67	22.75	22.85
		2	22.75
		3	22.83
1	Heat1-Actin-24h	1	22.32	22.39	22.39
		2	22.5
		3	22.35
2	Heat2-Actin-24h	1	22.5	22.45	22.39
		2	22.48
		3	22.37
3	Heat3-Actin-24h	1	21.6	21.71	22.39
		2	21.79
		3	21.74
1	Heat1-Actin-48h	1	20.46	20.55	20.96
		2	20.56
		3	20.63
2	Heat2-Actin-48h	1	20.68	20.56	20.96
		2	20.48
		3	20.52
3	Heat3-Actin-48h	1	21.77	21.77	20.96
		2	21.67
		3	21.87
1	Heat1-OsSC32-1h	1	21.25	21.3		-1.52333	2.87454
		2	21.42
		3	21.23
2	Heat2-OsSC32-1h	1	21.72	21.64		-1.18333	2.27101
		2	21.55
		3	21.65
3	Heat3-OsSC32-1h	1	21.19	21.28		-1.54333	2.91467
		2	21.35
		3	21.3
1	Heat1-OsSC32-2h	1	21.77	21.72		-1.65333	3.1456
		2	21.71
		3	21.68
2	Heat2-OsSC32-2h	1	21.61	21.6		-1.77333	3.41843
		2	21.7
		3	21.49
3	Heat3-OsSC32-2h	1	22.03	22		-1.37333	2.59068
		2	22.03
		3	21.94
1	Heat1-OsSC32-4h	1	21.77	21.69		-1.93	3.81055
		2	21.63
		3	21.67
2	Heat2-OsSC32-4h	1	21.87	21.86		-1.76	3.38698
		2	21.92
		3	21.79
3	Heat3-OsSC32-4h	1	21.69	21.69		-1.93	3.81055
		2	21.7
		3	21.68
1	Heat1-OsSC32-6h	1	21.38	21.37		-2.16	4.46915
		2	21.33
		3	21.4
2	Heat2-OsSC32-6h	1	21.54	21.65		-1.88	3.68075
		2	21.66
		3	21.75
3	Heat3-OsSC32-6h	1	21.29	21.28		-2.25	4.75683
		2	21.36
		3	21.19
1	Heat1-OsSC32-9h	1	20.67	20.61		-2.29667	4.91321
		2	20.59
		3	20.57
2	Heat2-OsSC32-9h	1	20.87	20.77		-2.13667	4.39745
		2	20.77
		3	20.67
3	Heat3-OsSC32-9h	1	20.87	20.84		-2.06667	4.18918
		2	20.78
		3	20.87
1	Heat1-OsSC32-12h	1	20.54	20.53		-2.32	4.99332
		2	20.63
		3	20.42
2	Heat2-OsSC32-12h	1	20.38	20.44		-2.41	5.31474
		2	20.54
		3	20.4
3	Heat3-OsSC32-12h	1	20.74	20.64		-2.21	4.62675
		2	20.64
		3	20.54
1	Heat1-OsSC32-24h	1	20.94	20.99		-1.4	2.63902
		2	21.01
		3	21.02
2	Heat2-OsSC32-24h	1	20.54	20.6		-1.79	3.45815
		2	20.68
		3	20.58
3	Heat3-OsSC32-24h	1	20.6	20.54		-1.85	3.605
		2	20.45
		3	20.57
1	Heat1-OsSC32-48h	1	20.74	20.69		-0.27	1.20581
		2	20.66
		3	20.67
2	Heat2-OsSC32-48h	1	20.63	20.72		-0.24	1.18099
		2	20.68
		3	20.85
3	Heat3-OsSC32-48h	1	20.51	20.49		-0.47	1.38511
		2	20.53
		3	20.43	2.87454		2.91467

## Sheet: OsSC34
qRT-PCR raw data for heat treatment of OsSC34
Biological replicates	Sample Name	Technical replicates	Cq	Cq Mean (Technical replicates)	Cq Mean (Biological replicates)	ΔCq	2-ΔCq
1	Heat1-Actin-1h	1	23.29	23.26	22.8233
		2	23.29
		3	23.2
2	Heat2-Actin-1h	1	22.63	22.7	22.8233
		2	22.74
		3	22.73
3	Heat3-Actin-1h	1	22.46	22.51	22.8233
		2	22.53
		3	22.54
1	Heat1-Actin-2h	1	23.31	23.35	23.3733
		2	23.36
		3	23.38
2	Heat2-Actin-2h	1	23.76	23.85	23.3733
		2	23.85
		3	23.94
3	Heat3-Actin-2h	1	22.88	22.92	23.3733
		2	22.86
		3	23.02
1	Heat1-Actin-4h	1	23.67	23.62	23.62
		2	23.56
		3	23.63
2	Heat2-Actin-4h	1	23.28	23.39	23.62
		2	23.41
		3	23.48
3	Heat3-Actin-4h	1	22.75	22.77	23.62
		2	22.81
		3	22.75
1	Heat1-Actin-6h	1	23.59	23.53	23.53
		2	23.46
		3	23.54
2	Heat2-Actin-6h	1	23.25	23.28	23.53
		2	23.41
		3	23.18
3	Heat3-Actin-6h	1	23.27	23.18	23.53
		2	23.16
		3	23.11
1	Heat1-Actin-9h	1	23.28	23.39	22.9067
		2	23.42
		3	23.47
2	Heat2-Actin-9h	1	22.53	22.52	22.9067
		2	22.41
		3	22.62
3	Heat3-Actin-9h	1	22.81	22.81	22.9067
		2	22.74
		3	22.88
1	Heat1-Actin-12h	1	22.77	22.85	22.85
		2	22.94
		3	22.84
2	Heat2-Actin-12h	1	22.06	21.97	22.85
		2	21.96
		3	21.89
3	Heat3-Actin-12h	1	22.74	22.75	22.85
		2	22.8
		3	22.71
1	Heat1-Actin-24h	1	22.45	22.39	22.39
		2	22.28
		3	22.44
2	Heat2-Actin-24h	1	22.5	22.45	22.39
		2	22.35
		3	22.5
3	Heat3-Actin-24h	1	21.8	21.71	22.39
		2	21.7
		3	21.63
1	Heat1-Actin-48h	1	20.66	20.55	20.96
		2	20.54
		3	20.45
2	Heat2-Actin-48h	1	20.51	20.56	20.96
		2	20.59
		3	20.58
3	Heat3-Actin-48h	1	21.74	21.77	20.96
		2	21.79
		3	21.78
1	Heat1-OsSC34-1h	1	24.85	24.74		1.91667	0.264866
		2	24.63
		3	24.74
2	Heat2-OsSC34-1h	1	24.23	24.14		1.31667	0.401461
		2	24.15
		3	24.04
3	Heat3-OsSC34-1h	1	24.52	24.46		1.63667	0.321599
		2	24.47
		3	24.39
1	Heat1-OsSC34-2h	1	24.09	24.07		0.696667	0.616996
		2	24.09
		3	24.03
2	Heat2-OsSC34-2h	1	24.15	24.17		0.796667	0.575678
		2	24.21
		3	24.15
3	Heat3-OsSC34-2h	1	24.26	24.37		0.996667	0.501157
		2	24.41
		3	24.44
1	Heat1-OsSC34-4h	1	24.49	24.38		0.76	0.590496
		2	24.38
		3	24.27
2	Heat2-OsSC34-4h	1	24.21	24.15		0.53	0.692555
		2	24.04
		3	24.2
3	Heat3-OsSC34-4h	1	23.91	23.92		0.3	0.812252
		2	23.83
		3	24.02
1	Heat1-OsSC34-6h	1	23.49	23.47		-0.06	1.04247
		2	23.55
		3	23.37
2	Heat2-OsSC34-6h	1	23.66	23.73		0.2	0.870551
		2	23.81
		3	23.72
3	Heat3-OsSC34-6h	1	23.16	23.05		-0.48	1.39474
		2	22.99
		3	23
1	Heat1-OsSC34-9h	1	23.69	23.73		0.823333	0.565135
		2	23.68
		3	23.82
2	Heat2-OsSC34-9h	1	23.86	23.86		0.953333	0.516438
		2	23.92
		3	23.8
3	Heat3-OsSC34-9h	1	23.44	23.41		0.503333	0.705475
		2	23.35
		3	23.44
1	Heat1-OsSC34-12h	1	22.94	22.95		0.1	0.933033
		2	22.94
		3	22.97
2	Heat2-OsSC34-12h	1	22.97	22.96		0.11	0.926588
		2	22.97
		3	22.94
3	Heat3-OsSC34-12h	1	22.87	22.92		0.07	0.952638
		2	22.89
		3	23
1	Heat1-OsSC34-24h	1	24.77	24.76		2.37	0.193446
		2	24.82
		3	24.69
2	Heat2-OsSC34-24h	1	24.83	24.89		2.5	0.176777
		2	24.83
		3	25.01
3	Heat3-OsSC34-24h	1	25.24	25.2		2.81	0.142595
		2	25.16
		3	25.2
1	Heat1-OsSC34-48h	1	24.54	24.56		3.6	0.0824692
		2	24.47
		3	24.67
2	Heat2-OsSC34-48h	1	24.29	24.24		3.28	0.102949
		2	24.3
		3	24.13
3	Heat3-OsSC34-48h	1	24.41	24.44		3.48	0.0896222
		2	24.54
		3	24.37	0.264866		0.321599

## Sheet: OsSC25
qRT-PCR raw data for heat treatment of OsSC25
Biological replicates	Sample Name	Technical replicates	Cq	Cq Mean (Technical replicates)	Cq Mean (Biological replicates)	ΔCq	2-ΔCq
1	Heat1-Actin-1h	1	23.3	23.26	22.8233
		2	23.2
		3	23.28
2	Heat2-Actin-1h	1	22.78	22.7	22.8233
		2	22.57
		3	22.75
3	Heat3-Actin-1h	1	22.49	22.51	22.8233
		2	22.63
		3	22.41
1	Heat1-Actin-2h	1	23.33	23.35	23.3733
		2	23.34
		3	23.38
2	Heat2-Actin-2h	1	23.91	23.85	23.3733
		2	23.74
		3	23.9
3	Heat3-Actin-2h	1	22.82	22.92	23.3733
		2	23.04
		3	22.9
1	Heat1-Actin-4h	1	23.58	23.62	23.62
		2	23.75
		3	23.53
2	Heat2-Actin-4h	1	23.46	23.39	23.62
		2	23.28
		3	23.43
3	Heat3-Actin-4h	1	22.79	22.77	23.62
		2	22.72
		3	22.8
1	Heat1-Actin-6h	1	23.51	23.53	23.53
		2	23.51
		3	23.57
2	Heat2-Actin-6h	1	23.25	23.28	23.53
		2	23.18
		3	23.41
3	Heat3-Actin-6h	1	23.16	23.18	23.53
		2	23.19
		3	23.19
1	Heat1-Actin-9h	1	23.43	23.39	22.9067
		2	23.39
		3	23.35
2	Heat2-Actin-9h	1	22.53	22.52	22.9067
		2	22.59
		3	22.44
3	Heat3-Actin-9h	1	22.84	22.81	22.9067
		2	22.85
		3	22.74
1	Heat1-Actin-12h	1	22.77	22.85	22.85
		2	22.93
		3	22.85
2	Heat2-Actin-12h	1	22.04	21.97	22.85
		2	21.99
		3	21.88
3	Heat3-Actin-12h	1	22.78	22.75	22.85
		2	22.7
		3	22.77
1	Heat1-Actin-24h	1	22.33	22.39	22.39
		2	22.46
		3	22.38
2	Heat2-Actin-24h	1	22.37	22.45	22.39
		2	22.44
		3	22.54
3	Heat3-Actin-24h	1	21.65	21.71	22.39
		2	21.82
		3	21.66
1	Heat1-Actin-48h	1	20.5	20.55	20.96
		2	20.63
		3	20.52
2	Heat2-Actin-48h	1	20.64	20.56	20.96
		2	20.5
		3	20.54
3	Heat3-Actin-48h	1	21.88	21.77	20.96
		2	21.7
		3	21.73
1	Heat1-OsSC25-1h	1	29.07	29.1		6.27667	0.0128984
		2	29.12
		3	29.11
2	Heat2-OsSC25-1h	1	29.4	29.31		6.48667	0.0111511
		2	29.32
		3	29.21
3	Heat3-OsSC25-1h	1	29.71	29.71		6.88667	0.00845097
		2	29.74
		3	29.68
1	Heat1-OsSC25-2h	1	29.29	29.31		5.93667	0.0163262
		2	29.42
		3	29.22
2	Heat2-OsSC25-2h	1	29.35	29.37		5.99667	0.0156611
		2	29.45
		3	29.31
3	Heat3-OsSC25-2h	1	29.97	29.91		6.53667	0.0107713
		2	29.87
		3	29.89
1	Heat1-OsSC25-4h	1	28.74	28.68		5.06	0.029977
		2	28.69
		3	28.61
2	Heat2-OsSC25-4h	1	28.77	28.79		5.17	0.0277763
		2	28.75
		3	28.85
3	Heat3-OsSC25-4h	1	29.11	29.12		5.5	0.0220971
		2	29.18
		3	29.07
1	Heat1-OsSC25-6h	1	27.86	27.79		4.26	0.052193
		2	27.8
		3	27.71
2	Heat2-OsSC25-6h	1	27.96	27.88		4.35	0.0490365
		2	27.86
		3	27.82
3	Heat3-OsSC25-6h	1	27.86	27.85		4.32	0.0500669
		2	27.86
		3	27.83
1	Heat1-OsSC25-9h	1	28.04	28.01		5.10333	0.02909
		2	28.09
		3	27.9
2	Heat2-OsSC25-9h	1	27.52	27.52		4.61333	0.0408553
		2	27.6
		3	27.44
3	Heat3-OsSC25-9h	1	27.91	27.89		4.98333	0.0316131
		2	27.86
		3	27.9
1	Heat1-OsSC25-12h	1	28.67	28.74		5.89	0.0168629
		2	28.7
		3	28.85
2	Heat2-OsSC25-12h	1	29.5	29.54		6.69	0.00968522
		2	29.55
		3	29.57
3	Heat3-OsSC25-12h	1	27.9	27.88		5.03	0.0306069
		2	27.79
		3	27.95
1	Heat1-OsSC25-24h	1	27.65	27.56		5.17	0.0277763
		2	27.49
		3	27.54
2	Heat2-OsSC25-24h	1	27.77	27.66		5.27	0.0259162
		2	27.58
		3	27.63
3	Heat3-OsSC25-24h	1	27.1	27.2		4.81	0.0356489
		2	27.23
		3	27.27
1	Heat1-OsSC25-48h	1	26.25	26.26		5.3	0.0253829
		2	26.22
		3	26.31
2	Heat2-OsSC25-48h	1	26.89	26.85		5.89	0.0168629
		2	26.88
		3	26.78
3	Heat3-OsSC25-48h	1	26.37	26.34		5.38	0.0240137
		2	26.27
		3	26.38

## Sheet: OsSR45a
qRT-PCR raw data for heat treatment of OsSR45a
Biological replicates	Sample Name	Technical replicates	Cq	Cq Mean (Technical replicates)	Cq Mean (Biological replicates)	ΔCq	2-ΔCq
1	Heat1-Actin-1h	1	23.33	23.26	22.8233
		2	23.23
		3	23.22
2	Heat2-Actin-1h	1	22.62	22.7	22.8233
		2	22.76
		3	22.72
3	Heat3-Actin-1h	1	22.59	22.51	22.8233
		2	22.54
		3	22.4
1	Heat1-Actin-2h	1	23.29	23.35	23.3733
		2	23.4
		3	23.36
2	Heat2-Actin-2h	1	23.75	23.85	23.3733
		2	23.98
		3	23.82
3	Heat3-Actin-2h	1	22.95	22.92	23.3733
		2	22.87
		3	22.94
1	Heat1-Actin-4h	1	23.68	23.62	23.62
		2	23.56
		3	23.62
2	Heat2-Actin-4h	1	23.45	23.39	23.62
		2	23.33
		3	23.39
3	Heat3-Actin-4h	1	22.73	22.77	23.62
		2	22.72
		3	22.86
1	Heat1-Actin-6h	1	23.6	23.53	23.53
		2	23.49
		3	23.5
2	Heat2-Actin-6h	1	23.37	23.28	23.53
		2	23.19
		3	23.28
3	Heat3-Actin-6h	1	23.22	23.18	23.53
		2	23.11
		3	23.21
1	Heat1-Actin-9h	1	23.4	23.39	22.9067
		2	23.39
		3	23.38
2	Heat2-Actin-9h	1	22.62	22.52	22.9067
		2	22.42
		3	22.52
3	Heat3-Actin-9h	1	22.84	22.81	22.9067
		2	22.85
		3	22.74
1	Heat1-Actin-12h	1	22.78	22.85	22.85
		2	22.91
		3	22.86
2	Heat2-Actin-12h	1	21.92	21.97	22.85
		2	21.91
		3	22.08
3	Heat3-Actin-12h	1	22.84	22.75	22.85
		2	22.71
		3	22.7
1	Heat1-Actin-24h	1	22.31	22.39	22.39
		2	22.41
		3	22.45
2	Heat2-Actin-24h	1	22.53	22.45	22.39
		2	22.44
		3	22.38
3	Heat3-Actin-24h	1	21.8	21.71	22.39
		2	21.72
		3	21.61
1	Heat1-Actin-48h	1	20.51	20.55	20.96
		2	20.59
		3	20.55
2	Heat2-Actin-48h	1	20.6	20.56	20.96
		2	20.46
		3	20.62
3	Heat3-Actin-48h	1	21.78	21.77	20.96
		2	21.79
		3	21.74
1	Heat1-OsSR45a-1h	1	20.98	21.05		-1.77333	3.41843
		2	21.08
		3	21.09
2	Heat2-OsSR45a-1h	1	20.43	20.35		-2.47333	5.55325
		2	20.33
		3	20.29
3	Heat3-OsSR45a-1h	1	20.48	20.58		-2.24333	4.7349
		2	20.68
		3	20.58
1	Heat1-OsSR45a-2h	1	20.71	20.77		-2.60333	6.07689
		2	20.72
		3	20.88
2	Heat2-OsSR45a-2h	1	20.48	20.59		-2.78333	6.88441
		2	20.7
		3	20.59
3	Heat3-OsSR45a-2h	1	21.11	21.15		-2.22333	4.66971
		2	21.14
		3	21.2
1	Heat1-OsSR45a-4h	1	20.76	20.72		-2.9	7.46426
		2	20.72
		3	20.68
2	Heat2-OsSR45a-4h	1	21.1	20.97		-2.65	6.27667
		2	20.95
		3	20.86
3	Heat3-OsSR45a-4h	1	21.03	20.93		-2.69	6.45313
		2	20.84
		3	20.92
1	Heat1-OsSR45a-6h	1	20.5	20.59		-2.94	7.67411
		2	20.66
		3	20.61
2	Heat2-OsSR45a-6h	1	20.72	20.69		-2.84	7.1602
		2	20.68
		3	20.67
3	Heat3-OsSR45a-6h	1	20.84	20.73		-2.8	6.9644
		2	20.65
		3	20.7
1	Heat1-OsSR45a-9h	1	22.48	22.46		-0.446667	1.36289
		2	22.45
		3	22.45
2	Heat2-OsSR45a-9h	1	21.89	21.92		-0.986667	1.9816
		2	21.84
		3	22.03
3	Heat3-OsSR45a-9h	1	21.7	21.69		-1.21667	2.32409
		2	21.63
		3	21.74
1	Heat1-OsSR45a-12h	1	22.43	22.41		-0.44	1.3566
		2	22.32
		3	22.48
2	Heat2-OsSR45a-12h	1	21.8	21.76		-1.09	2.12874
		2	21.65
		3	21.83
3	Heat3-OsSR45a-12h	1	22.09	22.09		-0.76	1.69349
		2	22.2
		3	21.98
1	Heat1-OsSR45a-24h	1	22.55	22.58		0.19	0.876606
		2	22.57
		3	22.62
2	Heat2-OsSR45a-24h	1	22.91	22.82		0.43	0.742262
		2	22.77
		3	22.78
3	Heat3-OsSR45a-24h	1	22.1	21.98		-0.41	1.32869
		2	21.96
		3	21.88
1	Heat1-OsSR45a-48h	1	21.39	21.36		0.4	0.757858
		2	21.37
		3	21.32
2	Heat2-OsSR45a-48h	1	21.67	21.55		0.59	0.664343
		2	21.44
		3	21.54
3	Heat3-OsSR45a-48h	1	21.56	21.61		0.65	0.63728
		2	21.72
		3	21.55

[truncated: 14 more sheets: OsSR45, OsRS2Z39, OsRS2Z37, OsRS2Z36, OsRS2Z38, OsRSZ21a, OsRSZ21, OsRSZ23, OsRS29, OsRS33, OsSR33, OsSR32, OsSR33a, OsSR40]
