# Supplementary material for: Comprehensive study of serine/arginine-rich (SR) gene family in rice: characterization, evolution and expression analysis
Source: PeerJ journal article supplement (doi:10.7717/peerj.16193), 2023-10-13
Supplement: qRTPCR_raw_dataTableS9S16.zip [file Supplemental Table_S15.xlsx]

## Sheet: OsSCL30a
qRT-PCR raw data for GA treatment of OsSCL30a
Biological replicates	Sample Name	Technical replicates	Cq	Cq Mean (Technical replicates)	Cq Mean (Biological replicates)	ΔCq	2-ΔCq
1	GA1-Actin-1h	1	24.61	24.55	24.52
		2	24.6
		3	24.44
2	GA2-Actin-1h	1	24.6	24.54	24.52
		2	24.56
		3	24.46
3	GA3-Actin-1h	1	24.47	24.47	24.52
		2	24.54
		3	24.4
1	GA1-Actin-2h	1	24.78	24.89	24.81
		2	24.95
		3	24.94
2	GA2-Actin-2h	1	24.61	24.69	24.81
		2	24.71
		3	24.75
3	GA3-Actin-2h	1	24.78	24.85	24.81
		2	24.89
		3	24.88
1	GA1-Actin-4h	1	24.88	24.88	24.8
		2	24.86
		3	24.9
2	GA2-Actin-4h	1	24.88	24.79	24.8
		2	24.74
		3	24.75
3	GA3-Actin-4h	1	24.73	24.74	24.8
		2	24.83
		3	24.66
1	GA1-Actin-6h	1	26.82	26.78	26.75
		2	26.72
		3	26.8
2	GA2-Actin-6h	1	26.75	26.67	26.75
		2	26.66
		3	26.6
3	GA3-Actin-6h	1	26.75	26.8	26.75
		2	26.88
		3	26.77
1	GA1-Actin-9h	1	27.2	27.11	27.13
		2	27.07
		3	27.06
2	GA2-Actin-9h	1	27.25	27.36	27.13
		2	27.4
		3	27.43
3	GA3-Actin-9h	1	26.88	26.91	27.13
		2	26.97
		3	26.88
1	GA1-Actin-12h	1	26.47	26.38	26.27
		2	26.35
		3	26.32
2	GA2-Actin-12h	1	25.48	25.58	26.27
		2	25.59
		3	25.67
3	GA3-Actin-12h	1	26.85	26.86	26.27
		2	26.76
		3	26.97
1	GA1-Actin-24h	1	25.83	25.77	25.44
		2	25.69
		3	25.79
2	GA2-Actin-24h	1	25.6	25.63	25.44
		2	25.64
		3	25.65
3	GA3-Actin-24h	1	24.9	24.91	25.44
		2	24.85
		3	24.98
1	GA1-Actin-48h	1	25.58	25.51	25.47
		2	25.4
		3	25.55
2	GA2-Actin-48h	1	25.29	25.39	25.47
		2	25.44
		3	25.44
3	GA3-Actin-48h	1	25.58	25.51	25.47
		2	25.55
		3	25.4
1	GA1-OsSCL30a-1h	1	27.35	27.39	27.41	2.87	0.136787
		2	27.47
		3	27.35
2	GA2-OsSCL30a-1h	1	27.43	27.33	27.41	2.81	0.142595
		2	27.23
		3	27.33
3	GA3-OsSCL30a-1h	1	27.51	27.52	27.41	3	0.125
		2	27.52
		3	27.53
1	GA1-OsSCL30a-2h	1	28.07	28.1	28.16	3.29	0.102238
		2	28.07
		3	28.16
2	GA2-OsSCL30a-2h	1	28.14	28.12	28.16	3.31	0.10083
		2	28.19
		3	28.03
3	GA3-OsSCL30a-2h	1	28.18	28.26	28.16	3.45	0.0915054
		2	28.32
		3	28.28
1	GA1-OsSCL30a-4h	1	27.93	27.83	27.84	3.02667	0.122711
		2	27.75
		3	27.81
2	GA2-OsSCL30a-4h	1	28.02	27.97	27.84	3.16667	0.111362
		2	28.01
		3	27.88
3	GA3-OsSCL30a-4h	1	27.78	27.72	27.84	2.91667	0.132433
		2	27.72
		3	27.66
1	GA1-OsSCL30a-6h	1	29.07	28.96	29	2.21	0.216134
		2	28.93
		3	28.88
2	GA2-OsSCL30a-6h	1	28.9	28.99	29	2.24	0.211686
		2	28.97
		3	29.1
3	GA3-OsSCL30a-6h	1	28.97	29.05	29	2.3	0.203063
		2	29.09
		3	29.09
1	GA1-OsSCL30a-9h	1	28.87	28.79	28.77	1.66333	0.315709
		2	28.73
		3	28.77
2	GA2-OsSCL30a-9h	1	28.59	28.7	28.77	1.57333	0.336031
		2	28.81
		3	28.7
3	GA3-OsSCL30a-9h	1	28.74	28.81	28.77	1.68333	0.311362
		2	28.79
		3	28.9
1	GA1-OsSCL30a-12h	1	28.6	28.64	28.69	2.36667	0.193893
		2	28.55
		3	28.77
2	GA2-OsSCL30a-12h	1	28.63	28.73	28.69	2.45667	0.182167
		2	28.7
		3	28.86
3	GA3-OsSCL30a-12h	1	28.6	28.7	28.69	2.42667	0.185995
		2	28.75
		3	28.75
1	GA1-OsSCL30a-24h	1	28.86	28.95	28.8	3.51333	0.0875752
		2	28.94
		3	29.05
2	GA2-OsSCL30a-24h	1	28.88	28.92	28.8	3.48333	0.0894154
		2	28.97
		3	28.91
3	GA3-OsSCL30a-24h	1	28.65	28.52	28.8	3.08333	0.117984
		2	28.43
		3	28.48
1	GA1-OsSCL30a-48h	1	28.84	28.72	28.81	3.25	0.105112
		2	28.64
		3	28.68
2	GA2-OsSCL30a-48h	1	28.89	28.84	28.855	3.37	0.0967228
		2	28.87
		3	28.76
3	GA3-OsSCL30a-48h	1	28.96	28.87	28.87	3.4	0.0947323
		2	28.83
		3	28.82

## Sheet: OsSCL30
qRT-PCR raw data for GA treatment of OsSCL30
Biological replicates	Sample Name	Technical replicates	Cq	Cq Mean (Technical replicates)	Cq Mean (Biological replicates)	ΔCq	2-ΔCq
1	GA1-Actin-1h	1	24.46	24.52	24.57
		2	24.46
		3	24.64
2	GA2-Actin-1h	1	24.62	24.63	24.57
		2	24.69
		3	24.58
3	GA3-Actin-1h	1	24.63	24.55	24.57
		2	24.53
		3	24.49
1	GA1-Actin-2h	1	25.09	25.01	24.94
		2	24.93
		3	25.01
2	GA2-Actin-2h	1	24.86	24.79	24.94
		2	24.73
		3	24.78
3	GA3-Actin-2h	1	24.91	25.02	24.94
		2	25.01
		3	25.14
1	GA1-Actin-4h	1	25.53	25.44	25.5
		2	25.38
		3	25.41
2	GA2-Actin-4h	1	25.24	25.27	25.5
		2	25.31
		3	25.26
3	GA3-Actin-4h	1	25.74	25.79	25.5
		2	25.84
		3	25.79
1	GA1-Actin-6h	1	25.9	25.98	25.86
		2	26.01
		3	26.03
2	GA2-Actin-6h	1	25.97	26.07	25.86
		2	26.08
		3	26.16
3	GA3-Actin-6h	1	25.64	25.55	25.86
		2	25.45
		3	25.56
1	GA1-Actin-9h	1	26.27	26.27	25.94
		2	26.16
		3	26.38
2	GA2-Actin-9h	1	25.58	25.69	25.94
		2	25.72
		3	25.77
3	GA3-Actin-9h	1	25.96	25.85	25.94
		2	25.8
		3	25.79
1	GA1-Actin-12h	1	25.57	25.57	25.37
		2	25.6
		3	25.54
2	GA2-Actin-12h	1	25.14	25.14	25.37
		2	25.21
		3	25.07
3	GA3-Actin-12h	1	25.36	25.41	25.37
		2	25.39
		3	25.48
1	GA1-Actin-24h	1	24.35	24.41	24.21
		2	24.41
		3	24.47
2	GA2-Actin-24h	1	23.86	23.97	24.21
		2	24.08
		3	23.97
3	GA3-Actin-24h	1	24.17	24.24	24.21
		2	24.18
		3	24.37
1	GA1-Actin-48h	1	23.87	23.91	23.88
		2	23.87
		3	23.99
2	GA2-Actin-48h	1	23.93	24	23.88
		2	23.99
		3	24.08
3	GA3-Actin-48h	1	23.72	23.73	23.88
		2	23.76
		3	23.71
1	GA1-OsSCL30-1h	1	29.18	29.19	29.23	4.62	0.0406669
		2	29.08
		3	29.31
2	GA2-OsSCL30-1h	1	29.39	29.39	29.23	4.82	0.0354026
		2	29.46
		3	29.32
3	GA3-OsSCL30-1h	1	29.22	29.12	29.23	4.55	0.0426888
		2	29.02
		3	29.12
1	GA1-OsSCL30-2h	1	30.86	30.79	29.69	5.85	0.017337
		2	30.68
		3	30.83
2	GA2-OsSCL30-2h	1	29.22	29.1	29.69	4.16	0.0559391
		2	29
		3	29.08
3	GA3-OsSCL30-2h	1	29.13	29.18	29.69	4.24	0.0529216
		2	29.21
		3	29.2
1	GA1-OsSCL30-4h	1	29.15	29.13	29.43	3.63	0.0807721
		2	29.11
		3	29.13
2	GA2-OsSCL30-4h	1	29.94	29.91	29.43	4.41	0.047039
		2	29.9
		3	29.89
3	GA3-OsSCL30-4h	1	29.16	29.25	29.43	3.75	0.0743254
		2	29.35
		3	29.24
1	GA1-OsSCL30-6h	1	29.33	29.39	29.25	3.53	0.0865693
		2	29.38
		3	29.46
2	GA2-OsSCL30-6h	1	29.31	29.35	29.25	3.49	0.0890031
		2	29.42
		3	29.32
3	GA3-OsSCL30-6h	1	29.11	29	29.25	3.14	0.11344
		2	29
		3	28.89
1	GA1-OsSCL30-9h	1	28.74	28.84	28.71	2.9	0.133972
		2	28.82
		3	28.96
2	GA2-OsSCL30-9h	1	28.71	28.82	28.71	2.88	0.135842
		2	28.91
		3	28.84
3	GA3-OsSCL30-9h	1	28.57	28.48	28.71	2.54	0.171943
		2	28.44
		3	28.43
1	GA1-OsSCL30-12h	1	28.33	28.32	28.3	2.95	0.129408
		2	28.25
		3	28.38
2	GA2-OsSCL30-12h	1	28.29	28.22	28.3	2.85	0.138696
		2	28.13
		3	28.24
3	GA3-OsSCL30-12h	1	28.34	28.36	28.3	2.99	0.125869
		2	28.43
		3	28.31
1	GA1-OsSCL30-24h	1	28.62	28.68	28.81	4.47	0.0451228
		2	28.66
		3	28.76
2	GA2-OsSCL30-24h	1	28.7	28.75	28.81	4.54	0.0429857
		2	28.78
		3	28.77
3	GA3-OsSCL30-24h	1	29.09	28.99	28.81	4.78	0.0363979
		2	28.91
		3	28.97
1	GA1-OsSCL30-48h	1	28.1	28.16	28.52	4.28	0.0514744
		2	28.25
		3	28.13
2	GA2-OsSCL30-48h	1	28.37	28.26	28.52	4.38	0.0480273
		2	28.19
		3	28.22
3	GA3-OsSCL30-48h	1	29.11	29.15	28.52	5.27	0.0259162
		2	29.12
		3	29.22

## Sheet: OsSCL57
qRT-PCR raw data for GA treatment of OsSCL57
Biological replicates	Sample Name	Technical replicates	Cq	Cq Mean (Technical replicates)	Cq Mean (Biological replicates)	ΔCq	2-ΔCq
1	GA1-Actin-1h	1	25.73	25.73	25.67
		2	25.8
		3	25.66
2	GA2-Actin-1h	1	25.55	25.62	25.67
		2	25.68
		3	25.63
3	GA3-Actin-1h	1	25.68	25.65	25.67
		2	25.64
		3	25.63
1	GA1-Actin-2h	1	26.11	26.03	26.02
		2	25.92
		3	26.06
2	GA2-Actin-2h	1	25.92	25.99	26.02
		2	26.12
		3	25.93
3	GA3-Actin-2h	1	26.15	26.04	26.02
		2	26.04
		3	25.93
1	GA1-Actin-4h	1	25.78	25.72	25.68
		2	25.68
		3	25.7
2	GA2-Actin-4h	1	25.71	25.63	25.68
		2	25.55
		3	25.63
3	GA3-Actin-4h	1	25.565	25.675	25.68
		2	25.685
		3	25.775
1	GA1-Actin-6h	1	26.24	26.21	26.12
		2	26.11
		3	26.28
2	GA2-Actin-6h	1	26.19	26.15	26.12
		2	26.11
		3	26.15
3	GA3-Actin-6h	1	26.04	25.99	26.12
		2	26.01
		3	25.92
1	GA1-Actin-9h	1	25.99	25.87	25.94
		2	25.81
		3	25.81
2	GA2-Actin-9h	1	25.9	25.95	25.94
		2	25.98
		3	25.97
3	GA3-Actin-9h	1	25.94	25.99	25.94
		2	26.01
		3	26.02
1	GA1-Actin-12h	1	26.61	26.57	26.55
		2	26.6
		3	26.5
2	GA2-Actin-12h	1	26.54	26.44	26.55
		2	26.33
		3	26.45
3	GA3-Actin-12h	1	26.77	26.64	26.55
		2	26.59
		3	26.56
1	GA1-Actin-24h	1	25.51	25.57	25.56
		2	25.52
		3	25.68
2	GA2-Actin-24h	1	25.48	25.49	25.56
		2	25.6
		3	25.39
3	GA3-Actin-24h	1	25.69	25.62	25.56
		2	25.52
		3	25.65
1	GA1-Actin-48h	1	25.54	25.51	25.47
		2	25.51
		3	25.48
2	GA2-Actin-48h	1	25.33	25.39	25.47
		2	25.45
		3	25.39
3	GA3-Actin-48h	1	25.45	25.51	25.47
		2	25.51
		3	25.57
1	GA1-OsSCL57-1h	1	27.8	27.9	27.95	2.23	0.213159
		2	27.92
		3	27.98
2	GA2-OsSCL57-1h	1	27.89	27.91	27.95	2.24	0.211686
		2	27.9
		3	27.94
3	GA3-OsSCL57-1h	1	28.11	28.05	27.95	2.38	0.192109
		2	28
		3	28.04
1	GA1-OsSCL57-2h	1	27.82	27.93	27.76	1.91	0.266093
		2	27.97
		3	28
2	GA2-OsSCL57-2h	1	27.85	27.76	27.76	1.74	0.29937
		2	27.68
		3	27.75
3	GA3-OsSCL57-2h	1	27.5	27.6	27.76	1.58	0.334482
		2	27.66
		3	27.64
1	GA1-OsSCL57-4h	1	27.55	27.49	27.49	1.81	0.285191
		2	27.42
		3	27.5
2	GA2-OsSCL57-4h	1	27.31	27.3	27.49	1.62	0.325335
		2	27.25
		3	27.34
3	GA3-OsSCL57-4h	1	27.7	27.69	27.49	2.01	0.248273
		2	27.77
		3	27.6
1	GA1-OsSCL57-6h	1	27.53	27.48	27.54	1.36	0.389582
		2	27.47
		3	27.44
2	GA2-OsSCL57-6h	1	27.59	27.52	27.54	1.4	0.378929
		2	27.55
		3	27.42
3	GA3-OsSCL57-6h	1	27.64	27.63	27.54	1.51	0.351111
		2	27.7
		3	27.55
1	GA1-OsSCL57-9h	1	27.1	27.04	27.21	1.1	0.466516
		2	27.02
		3	27
2	GA2-OsSCL57-9h	1	27.11	27.18	27.21	1.24	0.423373
		2	27.24
		3	27.19
3	GA3-OsSCL57-9h	1	27.38	27.41	27.21	1.47	0.360982
		2	27.4
		3	27.45
1	GA1-OsSCL57-12h	1	27.28	27.28	27.32	0.73	0.602904
		2	27.34
		3	27.22
2	GA2-OsSCL57-12h	1	27.46	27.4	27.32	0.85	0.554785
		2	27.31
		3	27.43
3	GA3-OsSCL57-12h	1	27.32	27.27	27.32	0.72	0.607097
		2	27.3
		3	27.19
1	GA1-OsSCL57-24h	1	28.31	28.22	28.24	2.66	0.15822
		2	28.19
		3	28.16
2	GA2-OsSCL57-24h	1	28.18	28.17	28.24	2.61	0.163799
		2	28.23
		3	28.1
3	GA3-OsSCL57-24h	1	28.32	28.34	28.24	2.78	0.145592
		2	28.25
		3	28.45
1	GA1-OsSCL57-48h	1	28.81	28.86	28.91	3.39	0.0953912
		2	28.92
		3	28.85
2	GA2-OsSCL57-48h	1	28.52	28.58	28.91	3.11	0.115824
		2	28.59
		3	28.63
3	GA3-OsSCL57-48h	1	29.24	29.28	28.91	3.81	0.0712977
		2	29.37
		3	29.23

## Sheet: OsSCL28
qRT-PCR raw data for GA treatment of OsSCL28
Biological replicates	Sample Name	Technical replicates	Cq	Cq Mean (Technical replicates)	Cq Mean (Biological replicates)	ΔCq	2-ΔCq
1	GA1-Actin-1h	1	24.46	24.52	24.57
		2	24.58
		3	24.52
2	GA2-Actin-1h	1	24.64	24.63	24.57
		2	24.51
		3	24.74
3	GA3-Actin-1h	1	24.49	24.55	24.57
		2	24.66
		3	24.5
1	GA1-Actin-2h	1	24.94	25.01	24.94
		2	24.97
		3	25.12
2	GA2-Actin-2h	1	24.84	24.79	24.94
		2	24.83
		3	24.7
3	GA3-Actin-2h	1	24.95	25.02	24.94
		2	25.09
		3	25.02
1	GA1-Actin-4h	1	25.43	25.44	25.5
		2	25.44
		3	25.45
2	GA2-Actin-4h	1	25.23	25.27	25.5
		2	25.22
		3	25.36
3	GA3-Actin-4h	1	25.74	25.79	25.5
		2	25.86
		3	25.77
1	GA1-Actin-6h	1	25.95	25.98	25.86
		2	26.03
		3	25.96
2	GA2-Actin-6h	1	25.99	26.07	25.86
		2	26.08
		3	26.14
3	GA3-Actin-6h	1	25.53	25.55	25.86
		2	25.55
		3	25.57
1	GA1-Actin-9h	1	26.2	26.27	25.94
		2	26.3
		3	26.31
2	GA2-Actin-9h	1	25.65	25.69	25.94
		2	25.81
		3	25.61
3	GA3-Actin-9h	1	25.85	25.85	25.94
		2	25.87
		3	25.83
1	GA1-Actin-12h	1	25.64	25.57	25.37
		2	25.46
		3	25.61
2	GA2-Actin-12h	1	25.19	25.14	25.37
		2	25.2
		3	25.03
3	GA3-Actin-12h	1	25.53	25.41	25.37
		2	25.36
		3	25.34
1	GA1-Actin-24h	1	24.33	24.41	24.21
		2	24.43
		3	24.47
2	GA2-Actin-24h	1	24.01	23.97	24.21
		2	23.86
		3	24.04
3	GA3-Actin-24h	1	24.29	24.24	24.21
		2	24.18
		3	24.25
1	GA1-Actin-48h	1	23.95	23.91	23.88
		2	23.9
		3	23.88
2	GA2-Actin-48h	1	24.08	24	23.88
		2	23.95
		3	23.97
3	GA3-Actin-48h	1	23.69	23.73	23.88
		2	23.84
		3	23.66
1	GA1-OsSCL28-1h	1	27.1	27.09	27.13	2.52	0.174343
		2	27.11
		3	27.06
2	GA2-OsSCL28-1h	1	27.1	27.19	27.13	2.62	0.162668
		2	27.15
		3	27.32
3	GA3-OsSCL28-1h	1	27.01	27.11	27.13	2.54	0.171943
		2	27.1
		3	27.22
1	GA1-OsSCL28-2h	1	26.66	26.71	26.7	1.77	0.293209
		2	26.84
		3	26.63
2	GA2-OsSCL28-2h	1	26.68	26.69	26.7	1.75	0.297302
		2	26.7
		3	26.69
3	GA3-OsSCL28-2h	1	26.63	26.7	26.7	1.76	0.295248
		2	26.68
		3	26.79
1	GA1-OsSCL28-4h	1	26.53	26.59	26.49	1.09	0.469761
		2	26.67
		3	26.57
2	GA2-OsSCL28-4h	1	26.39	26.41	26.49	0.91	0.532185
		2	26.5
		3	26.34
3	GA3-OsSCL28-4h	1	26.45	26.48	26.49	0.98	0.50698
		2	26.56
		3	26.43
1	GA1-OsSCL28-6h	1	25.83	25.76	25.93	-0.1	1.07177
		2	25.75
		3	25.7
2	GA2-OsSCL28-6h	1	25.77	25.83	25.93	-0.03	1.02101
		2	25.93
		3	25.79
3	GA3-OsSCL28-6h	1	26.28	26.2	25.93	0.34	0.790041
		2	26.21
		3	26.11
1	GA1-OsSCL28-9h	1	24.94	24.95	25.07	-0.99	1.98618
		2	24.93
		3	24.98
2	GA2-OsSCL28-9h	1	24.95	25.04	25.07	-0.9	1.86607
		2	25.15
		3	25.02
3	GA3-OsSCL28-9h	1	25.25	25.22	25.07	-0.72	1.64718
		2	25.12
		3	25.29
1	GA1-OsSCL28-12h	1	25.3	25.27	25.24	-0.1	1.07177
		2	25.17
		3	25.34
2	GA2-OsSCL28-12h	1	25.45	25.32	25.24	-0.05	1.03526
		2	25.22
		3	25.29
3	GA3-OsSCL28-12h	1	25.18	25.14	25.24	-0.23	1.17283
		2	25.03
		3	25.21
1	GA1-OsSCL28-24h	1	27.12	27.15	27.02	2.94	0.130308
		2	27.21
		3	27.12
2	GA2-OsSCL28-24h	1	27.09	27.07	27.02	2.86	0.137738
		2	27.01
		3	27.11
3	GA3-OsSCL28-24h	1	26.79	26.84	27.02	2.63	0.161544
		2	26.76
		3	26.97
1	GA1-OsSCL28-48h	1	26.23	26.19	26.14	2.31	0.20166
		2	26.25
		3	26.09
2	GA2-OsSCL28-48h	1	26.26	26.13	26.14	2.25	0.210224
		2	26.11
		3	26.02
3	GA3-OsSCL28-48h	1	26.23	26.1	26.14	2.22	0.214641
		2	26.06
		3	26.01

## Sheet: OsSCL25
qRT-PCR raw data for GA treatment of OsSCL25
Biological replicates	Sample Name	Technical replicates	Cq	Cq Mean (Technical replicates)	Cq Mean (Biological replicates)	ΔCq	2-ΔCq
1	GA1-Actin-1h	1	24.43	24.52	24.57
		2	24.58
		3	24.55
2	GA2-Actin-1h	1	24.69	24.63	24.57
		2	24.5
		3	24.7
3	GA3-Actin-1h	1	24.54	24.55	24.57
		2	24.65
		3	24.46
1	GA1-Actin-2h	1	25.01	25.01	24.94
		2	25.08
		3	24.94
2	GA2-Actin-2h	1	24.82	24.79	24.94
		2	24.72
		3	24.83
3	GA3-Actin-2h	1	24.91	25.02	24.94
		2	25.14
		3	25.01
1	GA1-Actin-4h	1	25.5	25.44	25.5
		2	25.48
		3	25.34
2	GA2-Actin-4h	1	25.24	25.27	25.5
		2	25.3
		3	25.27
3	GA3-Actin-4h	1	25.72	25.79	25.5
		2	25.82
		3	25.83
1	GA1-Actin-6h	1	25.96	25.98	25.86
		2	25.94
		3	26.04
2	GA2-Actin-6h	1	26.11	26.07	25.86
		2	26.09
		3	26.01
3	GA3-Actin-6h	1	25.68	25.55	25.86
		2	25.44
		3	25.53
1	GA1-Actin-9h	1	26.37	26.27	25.94
		2	26.25
		3	26.19
2	GA2-Actin-9h	1	25.72	25.69	25.94
		2	25.74
		3	25.61
3	GA3-Actin-9h	1	25.97	25.85	25.94
		2	25.77
		3	25.81
1	GA1-Actin-12h	1	25.5	25.57	25.37
		2	25.51
		3	25.7
2	GA2-Actin-12h	1	25.09	25.14	25.37
		2	25.22
		3	25.11
3	GA3-Actin-12h	1	25.52	25.41	25.37
		2	25.36
		3	25.35
1	GA1-Actin-24h	1	24.45	24.41	24.21
		2	24.35
		3	24.43
2	GA2-Actin-24h	1	23.95	23.97	24.21
		2	23.93
		3	24.03
3	GA3-Actin-24h	1	24.28	24.24	24.21
		2	24.18
		3	24.26
1	GA1-Actin-48h	1	23.85	23.91	23.88
		2	24.03
		3	23.85
2	GA2-Actin-48h	1	23.99	24	23.88
		2	23.96
		3	24.05
3	GA3-Actin-48h	1	23.69	23.73	23.88
		2	23.81
		3	23.69
1	GA1-OsSCL25-1h	1	24.9	24.96	25.03	0.39	0.76313
		2	25.05
		3	24.93
2	GA2-OsSCL25-1h	1	24.99	24.97	25.03	0.4	0.757858
		2	25.02
		3	24.9
3	GA3-OsSCL25-1h	1	25.22	25.16	25.03	0.59	0.664343
		2	25.18
		3	25.08
1	GA1-OsSCL25-2h	1	25.19	25.23	25.28	0.29	0.817902
		2	25.25
		3	25.25
2	GA2-OsSCL25-2h	1	25.63	25.51	25.28	0.57	0.673617
		2	25.5
		3	25.4
3	GA3-OsSCL25-2h	1	25.06	25.11	25.28	0.17	0.888843
		2	25.12
		3	25.15
1	GA1-OsSCL25-4h	1	25.18	25.09	25.17	-0.41	1.32869
		2	25.06
		3	25.03
2	GA2-OsSCL25-4h	1	25.19	25.23	25.17	-0.27	1.20581
		2	25.21
		3	25.29
3	GA3-OsSCL25-4h	1	25.22	25.19	25.17	-0.31	1.23971
		2	25.16
		3	25.19
1	GA1-OsSCL25-6h	1	25.88	25.85	25.86	-0.01	1.00696
		2	25.91
		3	25.76
2	GA2-OsSCL25-6h	1	25.88	25.82	25.86	-0.04	1.02811
		2	25.77
		3	25.81
3	GA3-OsSCL25-6h	1	25.97	25.89	25.86	0.03	0.97942
		2	25.79
		3	25.91
1	GA1-OsSCL25-9h	1	26.19	26.17	26.34	0.23	0.852635
		2	26.19
		3	26.13
2	GA2-OsSCL25-9h	1	26.46	26.44	26.34	0.5	0.707107
		2	26.4
		3	26.46
3	GA3-OsSCL25-9h	1	26.45	26.42	26.34	0.48	0.716978
		2	26.39
		3	26.42
1	GA1-OsSCL25-12h	1	25.55	25.43	25.52	0.06	0.959264
		2	25.42
		3	25.32
2	GA2-OsSCL25-12h	1	25.79	25.68	25.52	0.31	0.806642
		2	25.64
		3	25.61
3	GA3-OsSCL25-12h	1	25.44	25.44	25.52	0.07	0.952638
		2	25.54
		3	25.34
1	GA1-OsSCL25-24h	1	24.22	24.17	24.17	-0.04	1.02811
		2	24.18
		3	24.11
2	GA2-OsSCL25-24h	1	24.25	24.18	24.17	-0.03	1.02101
		2	24.07
		3	24.22
3	GA3-OsSCL25-24h	1	24.23	24.16	24.17	-0.05	1.03526
		2	24.07
		3	24.18
1	GA1-OsSCL25-48h	1	24.03	24.06	23.83	0.18	0.882703
		2	24.03
		3	24.12
2	GA2-OsSCL25-48h	1	23.6	23.56	23.83	-0.32	1.24833
		2	23.55
		3	23.53
3	GA3-OsSCL25-48h	1	23.82	23.88	23.83	0	1
		2	23.85
		3	23.97

## Sheet: OsSCL26
qRT-PCR raw data for GA treatment of OsSCL26
Biological replicates	Sample Name	Technical replicates	Cq	Cq Mean (Technical replicates)	Cq Mean (Biological replicates)	ΔCq	2-ΔCq
1	GA1-Actin-1h	1	24.47	24.52	24.57
		2	24.5
		3	24.59
2	GA2-Actin-1h	1	24.63	24.63	24.57
		2	24.61
		3	24.65
3	GA3-Actin-1h	1	24.56	24.55	24.57
		2	24.62
		3	24.47
1	GA1-Actin-2h	1	25	25.01	24.94
		2	25.02
		3	25.01
2	GA2-Actin-2h	1	24.72	24.79	24.94
		2	24.81
		3	24.84
3	GA3-Actin-2h	1	25.01	25.02	24.94
		2	24.98
		3	25.07
1	GA1-Actin-4h	1	25.36	25.44	25.5
		2	25.44
		3	25.52
2	GA2-Actin-4h	1	25.35	25.27	25.5
		2	25.19
		3	25.27
3	GA3-Actin-4h	1	25.76	25.79	25.5
		2	25.88
		3	25.73
1	GA1-Actin-6h	1	25.91	25.98	25.86
		2	25.93
		3	26.1
2	GA2-Actin-6h	1	26	26.07	25.86
		2	26.05
		3	26.16
3	GA3-Actin-6h	1	25.52	25.55	25.86
		2	25.61
		3	25.52
1	GA1-Actin-9h	1	26.31	26.27	25.94
		2	26.32
		3	26.18
2	GA2-Actin-9h	1	25.64	25.69	25.94
		2	25.63
		3	25.8
3	GA3-Actin-9h	1	25.81	25.85	25.94
		2	25.92
		3	25.82
1	GA1-Actin-12h	1	25.58	25.57	25.37
		2	25.63
		3	25.5
2	GA2-Actin-12h	1	25.15	25.14	25.37
		2	25.14
		3	25.13
3	GA3-Actin-12h	1	25.33	25.41	25.37
		2	25.43
		3	25.47
1	GA1-Actin-24h	1	24.43	24.41	24.21
		2	24.44
		3	24.36
2	GA2-Actin-24h	1	24	23.97	24.21
		2	23.94
		3	23.97
3	GA3-Actin-24h	1	24.25	24.24	24.21
		2	24.18
		3	24.29
1	GA1-Actin-48h	1	23.91	23.91	23.88
		2	23.93
		3	23.89
2	GA2-Actin-48h	1	23.98	24	23.88
		2	23.98
		3	24.04
3	GA3-Actin-48h	1	23.68	23.73	23.88
		2	23.76
		3	23.75
1	GA1-OsSCL26-1h	1	25.92	25.95	26.04	1.38	0.384219
		2	25.96
		3	25.97
2	GA2-OsSCL26-1h	1	26.11	26.16	26.04	1.59	0.332171
		2	26.14
		3	26.23
3	GA3-OsSCL26-1h	1	25.95	26	26.04	1.43	0.371131
		2	26
		3	26.05
1	GA1-OsSCL26-2h	1	26.01	25.92	25.89	0.98	0.50698
		2	25.85
		3	25.9
2	GA2-OsSCL26-2h	1	25.66	25.76	25.89	0.82	0.566442
		2	25.74
		3	25.88
3	GA3-OsSCL26-2h	1	25.87	25.98	25.89	1.04	0.486327
		2	25.98
		3	26.09
1	GA1-OsSCL26-4h	1	26.42	26.39	26.4	0.89	0.539614
		2	26.44
		3	26.31
2	GA2-OsSCL26-4h	1	26.4	26.44	26.4	0.94	0.521233
		2	26.44
		3	26.48
3	GA3-OsSCL26-4h	1	26.49	26.36	26.4	0.86	0.550953
		2	26.27
		3	26.32
1	GA1-OsSCL26-6h	1	26.69	26.71	26.67	0.85	0.554785
		2	26.68
		3	26.76
2	GA2-OsSCL26-6h	1	26.74	26.71	26.67	0.85	0.554785
		2	26.62
		3	26.77
3	GA3-OsSCL26-6h	1	26.57	26.6	26.67	0.74	0.598739
		2	26.61
		3	26.62
1	GA1-OsSCL26-9h	1	26.37	26.41	26.44	0.47	0.721965
		2	26.53
		3	26.33
2	GA2-OsSCL26-9h	1	26.62	26.68	26.44	0.74	0.598739
		2	26.8
		3	26.62
3	GA3-OsSCL26-9h	1	26.14	26.23	26.44	0.29	0.817902
		2	26.21
		3	26.34
1	GA1-OsSCL26-12h	1	25.98	25.98	25.98	0.61	0.655197
		2	25.87
		3	26.09
2	GA2-OsSCL26-12h	1	26.12	26.13	25.98	0.76	0.590496
		2	26.24
		3	26.03
3	GA3-OsSCL26-12h	1	25.79	25.82	25.98	0.45	0.732043
		2	25.91
		3	25.76
1	GA1-OsSCL26-24h	1	25.43	25.52	25.29	1.31	0.403321
		2	25.55
		3	25.58
2	GA2-OsSCL26-24h	1	25.21	25.31	25.29	1.1	0.466516
		2	25.29
		3	25.43
3	GA3-OsSCL26-24h	1	25.06	25.03	25.29	0.82	0.566442
		2	24.99
		3	25.04
1	GA1-OsSCL26-48h	1	25.62	25.62	25.37	1.74	0.29937
		2	25.65
		3	25.59
2	GA2-OsSCL26-48h	1	25.25	25.29	25.37	1.41	0.376312
		2	25.25
		3	25.37
3	GA3-OsSCL26-48h	1	25.16	25.2	25.37	1.32	0.400535
		2	25.27
		3	25.17

## Sheet: OsSC32
qRT-PCR raw data for GA treatment of OsSC32
Biological replicates	Sample Name	Technical replicates	Cq	Cq Mean (Technical replicates)	Cq Mean (Biological replicates)	ΔCq	2-ΔCq
1	GA1-Actin-1h	1	24.49	24.52	24.57
		2	24.43
		3	24.64
2	GA2-Actin-1h	1	24.53	24.63	24.57
		2	24.67
		3	24.69
3	GA3-Actin-1h	1	24.55	24.55	24.57
		2	24.51
		3	24.59
1	GA1-Actin-2h	1	24.97	25.01	24.94
		2	25.05
		3	25.01
2	GA2-Actin-2h	1	24.88	24.79	24.94
		2	24.71
		3	24.78
3	GA3-Actin-2h	1	25.05	25.02	24.94
		2	25.09
		3	24.92
1	GA1-Actin-4h	1	25.44	25.44	25.5
		2	25.5
		3	25.38
2	GA2-Actin-4h	1	25.22	25.27	25.5
		2	25.22
		3	25.37
3	GA3-Actin-4h	1	25.77	25.79	25.5
		2	25.76
		3	25.84
1	GA1-Actin-6h	1	25.9	25.98	25.86
		2	26.07
		3	25.97
2	GA2-Actin-6h	1	25.98	26.07	25.86
		2	26.15
		3	26.08
3	GA3-Actin-6h	1	25.47	25.55	25.86
		2	25.55
		3	25.63
1	GA1-Actin-9h	1	26.37	26.27	25.94
		2	26.17
		3	26.27
2	GA2-Actin-9h	1	25.69	25.69	25.94
		2	25.79
		3	25.59
3	GA3-Actin-9h	1	25.97	25.85	25.94
		2	25.79
		3	25.79
1	GA1-Actin-12h	1	25.47	25.57	25.37
		2	25.62
		3	25.62
2	GA2-Actin-12h	1	25.04	25.14	25.37
		2	25.13
		3	25.25
3	GA3-Actin-12h	1	25.45	25.41	25.37
		2	25.39
		3	25.39
1	GA1-Actin-24h	1	24.3	24.41	24.21
		2	24.54
		3	24.39
2	GA2-Actin-24h	1	23.93	23.97	24.21
		2	23.98
		3	24
3	GA3-Actin-24h	1	24.27	24.24	24.21
		2	24.16
		3	24.29
1	GA1-Actin-48h	1	23.93	23.91	23.88
		2	23.85
		3	23.95
2	GA2-Actin-48h	1	23.92	24	23.88
		2	23.97
		3	24.11
3	GA3-Actin-48h	1	23.7	23.73	23.88
		2	23.64
		3	23.85
1	GA1-OsSC32-1h	1	24.5	24.51	24.62	-0.06	1.04247
		2	24.47
		3	24.56
2	GA2-OsSC32-1h	1	24.68	24.66	24.62	0.09	0.939523
		2	24.6
		3	24.7
3	GA3-OsSC32-1h	1	24.72	24.7	24.62	0.13	0.913831
		2	24.67
		3	24.71
1	GA1-OsSC32-2h	1	24.93	24.81	24.82	-0.13	1.09429
		2	24.72
		3	24.78
2	GA2-OsSC32-2h	1	24.59	24.69	24.82	-0.25	1.18921
		2	24.71
		3	24.77
3	GA3-OsSC32-2h	1	25.03	24.95	24.82	0.01	0.993092
		2	24.94
		3	24.88
1	GA1-OsSC32-4h	1	24.67	24.58	24.52	-0.92	1.89212
		2	24.48
		3	24.59
2	GA2-OsSC32-4h	1	24.38	24.4	24.52	-1.1	2.14355
		2	24.33
		3	24.49
3	GA3-OsSC32-4h	1	24.59	24.58	24.52	-0.92	1.89212
		2	24.52
		3	24.63
1	GA1-OsSC32-6h	1	24.67	24.63	24.64	-1.23	2.34567
		2	24.62
		3	24.6
2	GA2-OsSC32-6h	1	24.48	24.46	24.64	-1.4	2.63902
		2	24.54
		3	24.36
3	GA3-OsSC32-6h	1	24.89	24.82	24.64	-1.04	2.05623
		2	24.83
		3	24.74
1	GA1-OsSC32-9h	1	24.63	24.62	24.41	-1.32	2.49666
		2	24.71
		3	24.52
2	GA2-OsSC32-9h	1	24.49	24.49	24.41	-1.45	2.73208
		2	24.51
		3	24.47
3	GA3-OsSC32-9h	1	24.16	24.13	24.41	-1.81	3.50642
		2	24.11
		3	24.12
1	GA1-OsSC32-12h	1	24.45	24.33	24.34	-1.04	2.05623
		2	24.26
		3	24.28
2	GA2-OsSC32-12h	1	24.81	24.69	24.34	-0.68	1.60214
		2	24.63
		3	24.63
3	GA3-OsSC32-12h	1	23.95	24	24.34	-1.37	2.58471
		2	24.09
		3	23.96
1	GA1-OsSC32-24h	1	23.72	23.74	24.08	-0.47	1.38511
		2	23.69
		3	23.81
2	GA2-OsSC32-24h	1	24.22	24.16	24.08	-0.05	1.03526
		2	24.08
		3	24.18
3	GA3-OsSC32-24h	1	24.34	24.35	24.08	0.14	0.907519
		2	24.24
		3	24.47
1	GA1-OsSC32-48h	1	24.19	24.23	23.87	0.35	0.784584
		2	24.29
		3	24.21
2	GA2-OsSC32-48h	1	23.9	23.83	23.87	-0.05	1.03526
		2	23.83
		3	23.76
3	GA3-OsSC32-48h	1	23.66	23.56	23.87	-0.32	1.24833
		2	23.55
		3	23.47

## Sheet: OsSC34
qRT-PCR raw data for GA treatment of OsSC34
Biological replicates	Sample Name	Technical replicates	Cq	Cq Mean (Technical replicates)	Cq Mean (Biological replicates)	ΔCq	2-ΔCq
1	GA1-Actin-1h	1	25.67	25.73	25.67
		2	25.75
		3	25.77
2	GA2-Actin-1h	1	25.61	25.62	25.67
		2	25.54
		3	25.71
3	GA3-Actin-1h	1	25.56	25.65	25.67
		2	25.64
		3	25.75
1	GA1-Actin-2h	1	26.04	26.03	26.02
		2	26.13
		3	25.92
2	GA2-Actin-2h	1	25.96	25.99	26.02
		2	26.01
		3	26
3	GA3-Actin-2h	1	26.01	26.04	26.02
		2	26.05
		3	26.06
1	GA1-Actin-4h	1	25.73	25.72	25.68
		2	25.75
		3	25.68
2	GA2-Actin-4h	1	25.65	25.63	25.68
		2	25.69
		3	25.55
3	GA3-Actin-4h	1	25.565	25.675	25.68
		2	25.785
		3	25.675
1	GA1-Actin-6h	1	26.2	26.21	26.12
		2	26.27
		3	26.16
2	GA2-Actin-6h	1	26.05	26.15	26.12
		2	26.2
		3	26.2
3	GA3-Actin-6h	1	25.89	25.99	26.12
		2	26.03
		3	26.05
1	GA1-Actin-9h	1	25.78	25.87	25.94
		2	25.94
		3	25.89
2	GA2-Actin-9h	1	25.93	25.95	25.94
		2	25.93
		3	25.99
3	GA3-Actin-9h	1	25.97	25.99	25.94
		2	26.09
		3	25.91
1	GA1-Actin-12h	1	26.6	26.57	26.55
		2	26.62
		3	26.49
2	GA2-Actin-12h	1	26.54	26.44	26.55
		2	26.43
		3	26.35
3	GA3-Actin-12h	1	26.69	26.64	26.55
		2	26.56
		3	26.67
1	GA1-Actin-24h	1	25.51	25.57	25.56
		2	25.65
		3	25.55
2	GA2-Actin-24h	1	25.45	25.49	25.56
		2	25.4
		3	25.62
3	GA3-Actin-24h	1	25.7	25.62	25.56
		2	25.59
		3	25.57
1	GA1-Actin-48h	1	25.51	25.51	25.47
		2	25.54
		3	25.48
2	GA2-Actin-48h	1	25.29	25.39	25.47
		2	25.38
		3	25.5
3	GA3-Actin-48h	1	25.51	25.51	25.47
		2	25.44
		3	25.58
1	GA1-OsSC34-1h	1	26.09	26.05	25.96	0.38	0.768438
		2	26.12
		3	25.94
2	GA2-OsSC34-1h	1	25.92	25.88	25.96	0.21	0.864537
		2	25.83
		3	25.89
3	GA3-OsSC34-1h	1	25.95	25.96	25.96	0.29	0.817902
		2	26.08
		3	25.85
1	GA1-OsSC34-2h	1	26.02	26.04	25.97	0.02	0.986233
		2	25.93
		3	26.17
2	GA2-OsSC34-2h	1	25.89	25.98	25.97	-0.04	1.02811
		2	25.98
		3	26.07
3	GA3-OsSC34-2h	1	25.8	25.9	25.97	-0.12	1.08673
		2	25.89
		3	26.01
1	GA1-OsSC34-4h	1	25.11	25.11	25.05	-0.57	1.48452
		2	25.18
		3	25.04
2	GA2-OsSC34-4h	1	25.13	25.06	25.05	-0.62	1.53688
		2	25.04
		3	25.01
3	GA3-OsSC34-4h	1	24.99	24.97	25.05	-0.71	1.6358
		2	24.98
		3	24.94
1	GA1-OsSC34-6h	1	25.54	25.58	25.31	-0.54	1.45397
		2	25.64
		3	25.56
2	GA2-OsSC34-6h	1	25.18	25.24	25.31	-0.88	1.84038
		2	25.35
		3	25.19
3	GA3-OsSC34-6h	1	25.14	25.12	25.31	-1	2
		2	25.01
		3	25.21
1	GA1-OsSC34-9h	1	25.11	25.04	24.97	-0.9	1.86607
		2	25.02
		3	24.99
2	GA2-OsSC34-9h	1	24.78	24.77	24.97	-1.17	2.25012
		2	24.83
		3	24.7
3	GA3-OsSC34-9h	1	25.1	25.11	24.97	-0.83	1.77769
		2	25.12
		3	25.11
1	GA1-OsSC34-12h	1	24.78	24.8	24.69	-1.75	3.36359
		2	24.92
		3	24.7
2	GA2-OsSC34-12h	1	24.62	24.66	24.69	-1.89	3.70635
		2	24.67
		3	24.69
3	GA3-OsSC34-12h	1	24.54	24.61	24.69	-1.94	3.83706
		2	24.74
		3	24.55
1	GA1-OsSC34-24h	1	26.25	26.15	26.08	0.59	0.664343
		2	26.11
		3	26.09
2	GA2-OsSC34-24h	1	26.14	26.07	26.08	0.51	0.702222
		2	26.09
		3	25.98
3	GA3-OsSC34-24h	1	26.03	26.02	26.08	0.46	0.726986
		2	25.97
		3	26.06
1	GA1-OsSC34-48h	1	27.11	27.2	27.17	1.73	0.301452
		2	27.3
		3	27.19
2	GA2-OsSC34-48h	1	27.06	27.09	27.17	1.62	0.325335
		2	27.13
		3	27.08
3	GA3-OsSC34-48h	1	27.28	27.23	27.17	1.76	0.295248
		2	27.16
		3	27.25

## Sheet: OsSC25
qRT-PCR raw data for GA treatment of OsSC25
Biological replicates	Sample Name	Technical replicates	Cq	Cq Mean (Technical replicates)	Cq Mean (Biological replicates)	ΔCq	2-ΔCq
1	GA1-Actin-1h	1	24.6	24.52	24.57
		2	24.47
		3	24.49
2	GA2-Actin-1h	1	24.63	24.63	24.57
		2	24.66
		3	24.6
3	GA3-Actin-1h	1	24.54	24.55	24.57
		2	24.52
		3	24.59
1	GA1-Actin-2h	1	24.98	25.01	24.94
		2	24.93
		3	25.12
2	GA2-Actin-2h	1	24.82	24.79	24.94
		2	24.71
		3	24.84
3	GA3-Actin-2h	1	25.15	25.02	24.94
		2	24.94
		3	24.97
1	GA1-Actin-4h	1	25.36	25.44	25.5
		2	25.53
		3	25.43
2	GA2-Actin-4h	1	25.27	25.27	25.5
		2	25.22
		3	25.32
3	GA3-Actin-4h	1	25.7	25.79	25.5
		2	25.82
		3	25.85
1	GA1-Actin-6h	1	26.06	25.98	25.86
		2	25.96
		3	25.92
2	GA2-Actin-6h	1	26	26.07	25.86
		2	26.14
		3	26.07
3	GA3-Actin-6h	1	25.49	25.55	25.86
		2	25.48
		3	25.68
1	GA1-Actin-9h	1	26.21	26.27	25.94
		2	26.35
		3	26.25
2	GA2-Actin-9h	1	25.65	25.69	25.94
		2	25.78
		3	25.64
3	GA3-Actin-9h	1	25.74	25.85	25.94
		2	25.96
		3	25.85
1	GA1-Actin-12h	1	25.6	25.57	25.37
		2	25.64
		3	25.47
2	GA2-Actin-12h	1	25.08	25.14	25.37
		2	25.13
		3	25.21
3	GA3-Actin-12h	1	25.46	25.41	25.37
		2	25.31
		3	25.46
1	GA1-Actin-24h	1	24.31	24.41	24.21
		2	24.48
		3	24.44
2	GA2-Actin-24h	1	23.87	23.97	24.21
		2	24.05
		3	23.99
3	GA3-Actin-24h	1	24.33	24.24	24.21
		2	24.18
		3	24.21
1	GA1-Actin-48h	1	23.8	23.91	23.88
		2	23.93
		3	24
2	GA2-Actin-48h	1	23.89	24	23.88
		2	23.98
		3	24.13
3	GA3-Actin-48h	1	23.76	23.73	23.88
		2	23.77
		3	23.66
1	GA1-OsSC25-1h	1	31.44	31.48	31.6	6.91	0.00831539
		2	31.46
		3	31.54
2	GA2-OsSC25-1h	1	31.93	31.85	31.6	7.28	0.0064343
		2	31.75
		3	31.87
3	GA3-OsSC25-1h	1	31.48	31.46	31.6	6.89	0.00843147
		2	31.49
		3	31.41
1	GA1-OsSC25-2h	1	31.18	31.15	31.35	6.21	0.0135084
		2	31.11
		3	31.16
2	GA2-OsSC25-2h	1	31.55	31.6	31.35	6.66	0.00988872
		2	31.72
		3	31.53
3	GA3-OsSC25-2h	1	31.25	31.31	31.35	6.37	0.0120904
		2	31.35
		3	31.33
1	GA1-OsSC25-4h	1	32.08	32.06	31.68	6.56	0.0105985
		2	32.05
		3	32.05
2	GA2-OsSC25-4h	1	31.21	31.31	31.68	5.81	0.0178244
		2	31.28
		3	31.44
3	GA3-OsSC25-4h	1	31.63	31.68	31.68	6.18	0.0137922
		2	31.62
		3	31.79
1	GA1-OsSC25-6h	1	31.54	31.64	31.49	5.78	0.018199
		2	31.63
		3	31.75
2	GA2-OsSC25-6h	1	31.32	31.38	31.49	5.52	0.0217929
		2	31.37
		3	31.45
3	GA3-OsSC25-6h	1	31.34	31.45	31.49	5.59	0.0207607
		2	31.53
		3	31.48
1	GA1-OsSC25-9h	1	30.84	30.75	30.52	4.81	0.0356489
		2	30.76
		3	30.65
2	GA2-OsSC25-9h	1	30.19	30.21	30.52	4.27	0.0518325
		2	30.33
		3	30.11
3	GA3-OsSC25-9h	1	30.64	30.6	30.52	4.66	0.0395549
		2	30.49
		3	30.67
1	GA1-OsSC25-12h	1	30.95	31.01	31.15	5.64	0.0200535
		2	30.96
		3	31.12
2	GA2-OsSC25-12h	1	31.34	31.38	31.15	6.01	0.0155171
		2	31.32
		3	31.48
3	GA3-OsSC25-12h	1	31.14	31.06	31.15	5.69	0.0193704
		2	31.06
		3	30.98
1	GA1-OsSC25-24h	1	30.87	30.98	31.1	6.77	0.00916277
		2	31.04
		3	31.03
2	GA2-OsSC25-24h	1	30.92	31.02	31.1	6.81	0.00891222
		2	31.15
		3	30.99
3	GA3-OsSC25-24h	1	31.28	31.29	31.1	7.08	0.00739108
		2	31.38
		3	31.21
1	GA1-OsSC25-48h	1	30.7	30.73	30.53	6.85	0.00866851
		2	30.86
		3	30.63
2	GA2-OsSC25-48h	1	30.52	30.55	30.53	6.67	0.00982042
		2	30.6
		3	30.53
3	GA3-OsSC25-48h	1	30.3	30.32	30.53	6.44	0.0115177
		2	30.41
		3	30.25

## Sheet: OsSR45a
qRT-PCR raw data for GA treatment of OsSR45a
Biological replicates	Sample Name	Technical replicates	Cq	Cq Mean (Technical replicates)	Cq Mean (Biological replicates)	ΔCq	2-ΔCq
1	GA1-Actin-1h	1	24.46	24.52	24.57
		2	24.64
		3	24.46
2	GA2-Actin-1h	1	24.6	24.63	24.57
		2	24.66
		3	24.63
3	GA3-Actin-1h	1	24.53	24.55	24.57
		2	24.49
		3	24.63
1	GA1-Actin-2h	1	25	25.01	24.94
		2	25.06
		3	24.97
2	GA2-Actin-2h	1	24.69	24.79	24.94
		2	24.77
		3	24.91
3	GA3-Actin-2h	1	25.12	25.02	24.94
		2	25.01
		3	24.93
1	GA1-Actin-4h	1	25.49	25.44	25.5
		2	25.34
		3	25.49
2	GA2-Actin-4h	1	25.33	25.27	25.5
		2	25.3
		3	25.18
3	GA3-Actin-4h	1	25.83	25.79	25.5
		2	25.77
		3	25.77
1	GA1-Actin-6h	1	25.88	25.98	25.86
		2	25.99
		3	26.07
2	GA2-Actin-6h	1	26.08	26.07	25.86
		2	26.04
		3	26.09
3	GA3-Actin-6h	1	25.63	25.55	25.86
		2	25.5
		3	25.52
1	GA1-Actin-9h	1	26.23	26.27	25.94
		2	26.37
		3	26.21
2	GA2-Actin-9h	1	25.71	25.69	25.94
		2	25.68
		3	25.68
3	GA3-Actin-9h	1	25.81	25.85	25.94
		2	25.97
		3	25.77
1	GA1-Actin-12h	1	25.6	25.57	25.37
		2	25.65
		3	25.46
2	GA2-Actin-12h	1	25.19	25.14	25.37
		2	25.08
		3	25.15
3	GA3-Actin-12h	1	25.41	25.41	25.37
		2	25.3
		3	25.52
1	GA1-Actin-24h	1	24.33	24.41	24.21
		2	24.46
		3	24.44
2	GA2-Actin-24h	1	24.06	23.97	24.21
		2	23.9
		3	23.95
3	GA3-Actin-24h	1	24.18	24.24	24.21
		2	24.3
		3	24.24
1	GA1-Actin-48h	1	23.91	23.91	23.88
		2	23.82
		3	24
2	GA2-Actin-48h	1	23.96	24	23.88
		2	24.13
		3	23.91
3	GA3-Actin-48h	1	23.68	23.73	23.88
		2	23.71
		3	23.8
1	GA1-OsSR45a-1h	1	21.95	21.88	22.16	-2.69	6.45313
		2	21.87
		3	21.82
2	GA2-OsSR45a-1h	1	22.31	22.35	22.16	-2.22	4.65893
		2	22.3
		3	22.44
3	GA3-OsSR45a-1h	1	22.18	22.25	22.16	-2.32	4.99332
		2	22.23
		3	22.34
1	GA1-OsSR45a-2h	1	21.86	21.97	22.33	-2.97	7.83536
		2	22.06
		3	21.99
2	GA2-OsSR45a-2h	1	22.41	22.39	22.33	-2.55	5.85634
		2	22.42
		3	22.34
3	GA3-OsSR45a-2h	1	22.63	22.63	22.33	-2.31	4.95883
		2	22.72
		3	22.54
1	GA1-OsSR45a-4h	1	22.03	22.09	22.08	-3.41	10.6295
		2	22.11
		3	22.13
2	GA2-OsSR45a-4h	1	22.12	22.09	22.08	-3.41	10.6295
		2	21.99
		3	22.16
3	GA3-OsSR45a-4h	1	22.06	22.07	22.08	-3.43	10.7779
		2	21.98
		3	22.17
1	GA1-OsSR45a-6h	1	22.05	22.14	22.3	-3.72	13.1775
		2	22.23
		3	22.14
2	GA2-OsSR45a-6h	1	21.98	21.93	22.3	-3.93	15.2422
		2	21.84
		3	21.97
3	GA3-OsSR45a-6h	1	21.72	21.83	22.3	-4.03	16.3362
		2	21.82
		3	21.95
1	GA1-OsSR45a-9h	1	22.45	22.56	22.5	-3.38	10.4107
		2	22.66
		3	22.57
2	GA2-OsSR45a-9h	1	22.12	22.18	22.5	-3.76	13.5479
		2	22.19
		3	22.23
3	GA3-OsSR45a-9h	1	22.88	22.77	22.5	-3.17	9.00047
		2	22.75
		3	22.68
1	GA1-OsSR45a-12h	1	23.02	23.04	23.05	-2.33	5.02805
		2	22.98
		3	23.12
2	GA2-OsSR45a-12h	1	22.74	22.8	23.05	-2.57	5.93809
		2	22.91
		3	22.75
3	GA3-OsSR45a-12h	1	23.3	23.31	23.05	-2.06	4.16986
		2	23.26
		3	23.37
1	GA1-OsSR45a-24h	1	22.48	22.58	22.85	-1.63	3.09513
		2	22.6
		3	22.66
2	GA2-OsSR45a-24h	1	23.06	23.04	22.85	-1.17	2.25012
		2	22.97
		3	23.09
3	GA3-OsSR45a-24h	1	22.83	22.93	22.85	-1.28	2.42839
		2	22.97
		3	22.99
1	GA1-OsSR45a-48h	1	22.78	22.71	22.4	-1.17	2.25012
		2	22.66
		3	22.69
2	GA2-OsSR45a-48h	1	22.54	22.52	22.4	-1.36	2.56685
		2	22.49
		3	22.53
3	GA3-OsSR45a-48h	1	21.95	21.98	22.4	-1.9	3.73213
		2	21.98
		3	22.01

[truncated: 14 more sheets: OsSR45, OsRS2Z39, OsRS2Z37, OsRS2Z36, OsRS2Z38, OsRSZ21a, OsRSZ21, OsRSZ23, OsRS29, OsRS33, OsSR33, OsSR32, OsSR33a, OsSR40]
