# Supplementary material for: Comprehensive study of serine/arginine-rich (SR) gene family in rice: characterization, evolution and expression analysis
Source: PeerJ journal article supplement (doi:10.7717/peerj.16193), 2023-10-13
Supplement: qRTPCR_raw_dataTableS9S16.zip [file Supplemental Table_S16.xlsx]

## Sheet: OsSCL30a
qRT-PCR raw data for ABA treatment of OsSCL30a
Biological replicates	Sample Name	Technical replicates	Cq	Cq Mean (Technical replicates)	Cq Mean (Biological replicates)	ΔCq	2-ΔCq
1	ABA1-Actin-1h	1	27.53	27.62	27.66
		2	27.64
		3	27.69
2	ABA2-Actin-1h	1	27.66	27.75	27.66
		2	27.75
		3	27.84
3	ABA3-Actin-1h	1	27.58	27.61	27.66
		2	27.52
		3	27.73
1	ABA1-Actin-2h	1	27.84	27.88	27.8
		2	27.9
		3	27.9
2	ABA2-Actin-2h	1	27.83	27.76	27.8
		2	27.8
		3	27.65
3	ABA3-Actin-2h	1	27.65	27.75	27.8
		2	27.73
		3	27.87
1	ABA1-Actin-4h	1	27.71	27.74	27.75
		2	27.8
		3	27.71
2	ABA2-Actin-4h	1	27.81	27.8	27.75
		2	27.75
		3	27.84
3	ABA3-Actin-4h	1	27.63	27.7	27.75
		2	27.75
		3	27.72
1	ABA1-Actin-6h	1	27.66	27.67	27.63
		2	27.64
		3	27.71
2	ABA2-Actin-6h	1	27.64	27.59	27.63
		2	27.56
		3	27.57
3	ABA3-Actin-6h	1	27.64	27.62	27.63
		2	27.69
		3	27.53
1	ABA1-Actin-9h	1	27.74	27.61	27.64
		2	27.53
		3	27.56
2	ABA2-Actin-9h	1	27.72	27.7	27.64
		2	27.59
		3	27.79
3	ABA3-Actin-9h	1	27.59	27.6	27.64
		2	27.7
		3	27.51
1	ABA1-Actin-12h	1	27.72	27.59	27.51
		2	27.49
		3	27.56
2	ABA2-Actin-12h	1	27.65	27.65	27.51
		2	27.63
		3	27.67
3	ABA3-Actin-12h	1	27.24	27.29	27.51
		2	27.21
		3	27.42
1	ABA1-Actin-24h	1	27.58	27.69	27.74
		2	27.68
		3	27.81
2	ABA2-Actin-24h	1	27.76	27.85	27.74
		2	27.93
		3	27.86
3	ABA3-Actin-24h	1	27.57	27.68	27.74
		2	27.75
		3	27.72
1	ABA1-Actin-48h	1	28.25	28.19	28.06
		2	28.09
		3	28.23
2	ABA2-Actin-48h	1	28.03	28.12	28.06
		2	28.08
		3	28.25
3	ABA3-Actin-48h	1	27.9	27.87	28.06
		2	27.79
		3	27.92
1	ABA1-OsSCL30a-1h	1	31.12	31.08		3.42	0.0934281
		2	30.97
		3	31.15
2	ABA2-OsSCL30a-1h	1	30.88	30.82		3.16	0.111878
		2	30.83
		3	30.75
3	ABA3-OsSCL30a-1h	1	31.02	30.98		3.32	0.100134
		2	30.88
		3	31.04
1	ABA1-OsSCL30a-2h	1	30.86	30.95		3.15	0.112656
		2	31.04
		3	30.95
2	ABA2-OsSCL30a-2h	1	30.75	30.81		3.01	0.124137
		2	30.92
		3	30.76
3	ABA3-OsSCL30a-2h	1	30.93	30.86		3.06	0.119908
		2	30.75
		3	30.9
1	ABA1-OsSCL30a-4h	1	30.82	30.85		3.1	0.116629
		2	30.97
		3	30.76
2	ABA2-OsSCL30a-4h	1	30.56	30.63		2.88	0.135842
		2	30.75
		3	30.58
3	ABA3-OsSCL30a-4h	1	31.06	30.95		3.2	0.108819
		2	30.89
		3	30.9
1	ABA1-OsSCL30a-6h	1	30.75	30.84		3.21	0.108067
		2	30.82
		3	30.95
2	ABA2-OsSCL30a-6h	1	30.85	30.84		3.21	0.108067
		2	30.85
		3	30.82
3	ABA3-OsSCL30a-6h	1	30.98	30.93		3.3	0.101532
		2	30.94
		3	30.87
1	ABA1-OsSCL30a-9h	1	30.22	30.2		2.56	0.169576
		2	30.14
		3	30.24
2	ABA2-OsSCL30a-9h	1	30.53	30.51		2.87	0.136787
		2	30.53
		3	30.47
3	ABA3-OsSCL30a-9h	1	30.29	30.22		2.58	0.167241
		2	30.17
		3	30.2
1	ABA1-OsSCL30a-12h	1	29.96	29.99		2.48	0.179244
		2	30.11
		3	29.9
2	ABA2-OsSCL30a-12h	1	30.42	30.35		2.84	0.139661
		2	30.33
		3	30.3
3	ABA3-OsSCL30a-12h	1	30.03	30.07		2.56	0.169576
		2	30.13
		3	30.05
1	ABA1-OsSCL30a-24h	1	30.89	30.98		3.24	0.105843
		2	31.07
		3	30.98
2	ABA2-OsSCL30a-24h	1	30.59	30.51		2.77	0.146604
		2	30.46
		3	30.48
3	ABA3-OsSCL30a-24h	1	30.55	30.56		2.82	0.14161
		2	30.66
		3	30.47
1	ABA1-OsSCL30a-48h	1	31.27	31.36		3.3	0.101532
		2	31.46
		3	31.35
2	ABA2-OsSCL30a-48h	1	31.17	31.28		3.22	0.107321
		2	31.27
		3	31.4
3	ABA3-OsSCL30a-48h	1	31.05	30.97		2.91	0.133046
		2	30.91
		3	30.95

## Sheet: OsSCL30
qRT-PCR raw data for ABA treatment of OsSCL30
Biological replicates	Sample Name	Technical replicates	Cq	Cq Mean (Technical replicates)	Cq Mean (Biological replicates)	ΔCq	2-ΔCq
1	ABA1-Actin-1h	1	23.17	23.16	22.47
		2	23.08
		3	23.23
2	ABA2-Actin-1h	1	21.97	21.96	22.47
		2	22.02
		3	21.89
3	ABA3-Actin-1h	1	22.34	22.29	22.47
		2	22.3
		3	22.23
1	ABA1-Actin-2h	1	22.97	22.86	22.7667
		2	22.8
		3	22.81
2	ABA2-Actin-2h	1	22.7	22.74	22.7667
		2	22.86
		3	22.66
3	ABA3-Actin-2h	1	22.6	22.7	22.7667
		2	22.79
		3	22.71
1	ABA1-Actin-4h	1	22.73	22.76	22.95
		2	22.73
		3	22.82
2	ABA2-Actin-4h	1	23.28	23.21	22.95
		2	23.22
		3	23.13
3	ABA3-Actin-4h	1	22.94	22.88	22.95
		2	22.9
		3	22.8
1	ABA1-Actin-6h	1	23.25	23.29	23.3867
		2	23.37
		3	23.25
2	ABA2-Actin-6h	1	23.54	23.42	23.3867
		2	23.36
		3	23.36
3	ABA3-Actin-6h	1	23.45	23.45	23.3867
		2	23.45
		3	23.45
1	ABA1-Actin-9h	1	24.13	24.21	23.7433
		2	24.23
		3	24.27
2	ABA2-Actin-9h	1	23.74	23.81	23.7433
		2	23.87
		3	23.82
3	ABA3-Actin-9h	1	23.31	23.21	23.7433
		2	23.18
		3	23.14
1	ABA1-Actin-12h	1	22.76	22.87	23.1933
		2	22.96
		3	22.89
2	ABA2-Actin-12h	1	23.39	23.39	23.1933
		2	23.3
		3	23.48
3	ABA3-Actin-12h	1	23.3	23.32	23.1933
		2	23.44
		3	23.22
1	ABA1-Actin-24h	1	23.53	23.52	23.1
		2	23.44
		3	23.59
2	ABA2-Actin-24h	1	22.78	22.86	23.1
		2	22.84
		3	22.96
3	ABA3-Actin-24h	1	22.85	22.92	23.1
		2	22.89
		3	23.02
1	ABA1-Actin-48h	1	22.42	22.5	23.0533
		2	22.51
		3	22.57
2	ABA2-Actin-48h	1	23.19	23.28	23.0533
		2	23.25
		3	23.4
3	ABA3-Actin-48h	1	23.37	23.38	23.0533
		2	23.33
		3	23.44
1	ABA1-OsSCL30-1h	1	26.26	26.22		3.75	0.0743254
		2	26.14
		3	26.26
2	ABA2-OsSCL30-1h	1	25.92	25.81		3.34	0.0987552
		2	25.73
		3	25.78
3	ABA3-OsSCL30-1h	1	25.59	25.62		3.15	0.112656
		2	25.62
		3	25.65
1	ABA1-OsSCL30-2h	1	28.76	28.76		5.99333	0.0156974
		2	28.74
		3	28.78
2	ABA2-OsSCL30-2h	1	28.69	28.56		5.79333	0.0180315
		2	28.47
		3	28.52
3	ABA3-OsSCL30-2h	1	28.67	28.69		5.92333	0.0164778
		2	28.74
		3	28.66
1	ABA1-OsSCL30-4h	1	27.65	27.59		4.64	0.0401071
		2	27.59
		3	27.53
2	ABA2-OsSCL30-4h	1	27.36	27.29		4.34	0.0493776
		2	27.31
		3	27.2
3	ABA3-OsSCL30-4h	1	27.36	27.32		4.37	0.0483614
		2	27.36
		3	27.24
1	ABA1-OsSCL30-6h	1	27.84	27.95		4.56333	0.042296
		2	27.98
		3	28.03
2	ABA2-OsSCL30-6h	1	28.25	28.31		4.92333	0.0329556
		2	28.35
		3	28.33
3	ABA3-OsSCL30-6h	1	28.65	28.61		5.22333	0.0267683
		2	28.53
		3	28.65
1	ABA1-OsSCL30-9h	1	29.44	29.42		5.67667	0.0195503
		2	29.34
		3	29.48
2	ABA2-OsSCL30-9h	1	29.31	29.32		5.57667	0.0209535
		2	29.39
		3	29.26
3	ABA3-OsSCL30-9h	1	29.54	29.62		5.87667	0.0170195
		2	29.72
		3	29.6
1	ABA1-OsSCL30-12h	1	27.78	27.88		4.68667	0.0388305
		2	27.85
		3	28.01
2	ABA2-OsSCL30-12h	1	28.32	28.39		5.19667	0.0272676
		2	28.42
		3	28.43
3	ABA3-OsSCL30-12h	1	28.36	28.4		5.20667	0.0270793
		2	28.37
		3	28.47
1	ABA1-OsSCL30-24h	1	29.02	28.99		5.89	0.0168629
		2	28.88
		3	29.07
2	ABA2-OsSCL30-24h	1	28.71	28.77		5.67	0.0196408
		2	28.7
		3	28.9
3	ABA3-OsSCL30-24h	1	28.8	28.82		5.72	0.0189718
		2	28.86
		3	28.8
1	ABA1-OsSCL30-48h	1	28.46	28.38		5.32667	0.024918
		2	28.28
		3	28.4
2	ABA2-OsSCL30-48h	1	27.87	27.93		4.87667	0.034039
		2	27.86
		3	28.06
3	ABA3-OsSCL30-48h	1	28.7	28.6		5.54667	0.0213938
		2	28.58
		3	28.52

## Sheet: OsSCL57
qRT-PCR raw data for ABA treatment of OsSCL57
Biological replicates	Sample Name	Technical replicates	Cq	Cq Mean (Technical replicates)	Cq Mean (Biological replicates)	ΔCq	2-ΔCq
1	ABA1-Actin-1h	1	23.12	23.16	22.47
		2	23.17
		3	23.19
2	ABA2-Actin-1h	1	21.85	21.96	22.47
		2	22.02
		3	22.01
3	ABA3-Actin-1h	1	22.25	22.29	22.47
		2	22.27
		3	22.35
1	ABA1-Actin-2h	1	22.83	22.86	22.7667
		2	22.91
		3	22.84
2	ABA2-Actin-2h	1	22.63	22.74	22.7667
		2	22.76
		3	22.83
3	ABA3-Actin-2h	1	22.78	22.7	22.7667
		2	22.64
		3	22.68
1	ABA1-Actin-4h	1	22.67	22.76	22.95
		2	22.83
		3	22.78
2	ABA2-Actin-4h	1	23.26	23.21	22.95
		2	23.2
		3	23.17
3	ABA3-Actin-4h	1	23.01	22.88	22.95
		2	22.85
		3	22.78
1	ABA1-Actin-6h	1	23.3	23.29	23.3867
		2	23.2
		3	23.37
2	ABA2-Actin-6h	1	23.55	23.42	23.3867
		2	23.35
		3	23.36
3	ABA3-Actin-6h	1	23.43	23.45	23.3867
		2	23.53
		3	23.39
1	ABA1-Actin-9h	1	24.23	24.21	23.7433
		2	24.14
		3	24.26
2	ABA2-Actin-9h	1	23.72	23.81	23.7433
		2	23.88
		3	23.83
3	ABA3-Actin-9h	1	23.25	23.21	23.7433
		2	23.28
		3	23.1
1	ABA1-Actin-12h	1	22.8	22.87	23.1933
		2	22.98
		3	22.83
2	ABA2-Actin-12h	1	23.32	23.39	23.1933
		2	23.33
		3	23.52
3	ABA3-Actin-12h	1	23.31	23.32	23.1933
		2	23.34
		3	23.31
1	ABA1-Actin-24h	1	23.51	23.52	23.1
		2	23.45
		3	23.6
2	ABA2-Actin-24h	1	22.98	22.86	23.1
		2	22.77
		3	22.83
3	ABA3-Actin-24h	1	23	22.92	23.1
		2	22.93
		3	22.83
1	ABA1-Actin-48h	1	22.51	22.5	23.0533
		2	22.49
		3	22.5
2	ABA2-Actin-48h	1	23.21	23.28	23.0533
		2	23.25
		3	23.38
3	ABA3-Actin-48h	1	23.3	23.38	23.0533
		2	23.45
		3	23.39
1	ABA1-OsSCL57-1h	1	27.91	27.78		5.31	0.0252076
		2	27.7
		3	27.73
2	ABA2-OsSCL57-1h	1	27.94	27.85		5.38	0.0240137
		2	27.83
		3	27.78
3	ABA3-OsSCL57-1h	1	27.47	27.38		4.91	0.0332616
		2	27.29
		3	27.38
1	ABA1-OsSCL57-2h	1	26.6	26.55		3.78333	0.0726278
		2	26.46
		3	26.59
2	ABA2-OsSCL57-2h	1	26.74	26.7		3.93333	0.0654559
		2	26.62
		3	26.74
3	ABA3-OsSCL57-2h	1	26.58	26.5		3.73333	0.0751891
		2	26.47
		3	26.45
1	ABA1-OsSCL57-4h	1	27.6	27.62		4.67	0.0392817
		2	27.59
		3	27.67
2	ABA2-OsSCL57-4h	1	27.66	27.68		4.73	0.0376815
		2	27.63
		3	27.75
3	ABA3-OsSCL57-4h	1	27.63	27.62		4.67	0.0392817
		2	27.68
		3	27.55
1	ABA1-OsSCL57-6h	1	26.44	26.51		3.12333	0.114758
		2	26.52
		3	26.57
2	ABA2-OsSCL57-6h	1	26.48	26.48		3.09333	0.117169
		2	26.38
		3	26.58
3	ABA3-OsSCL57-6h	1	25.82	25.86		2.47333	0.180075
		2	25.89
		3	25.87
1	ABA1-OsSCL57-9h	1	25.47	25.57		1.82667	0.281915
		2	25.62
		3	25.62
2	ABA2-OsSCL57-9h	1	25.78	25.82		2.07667	0.237062
		2	25.74
		3	25.94
3	ABA3-OsSCL57-9h	1	26.13	26		2.25667	0.209255
		2	25.93
		3	25.94
1	ABA1-OsSCL57-12h	1	24.86	24.92		1.72667	0.302149
		2	24.96
		3	24.94
2	ABA2-OsSCL57-12h	1	24.44	24.53		1.33667	0.395934
		2	24.55
		3	24.6
3	ABA3-OsSCL57-12h	1	24.74	24.83		1.63667	0.321599
		2	24.93
		3	24.82
1	ABA1-OsSCL57-24h	1	25.29	25.32		2.22	0.214641
		2	25.35
		3	25.32
2	ABA2-OsSCL57-24h	1	24.91	24.9		1.8	0.287175
		2	24.97
		3	24.82
3	ABA3-OsSCL57-24h	1	25.29	25.28		2.18	0.220676
		2	25.37
		3	25.18
1	ABA1-OsSCL57-48h	1	24.62	24.63		1.57667	0.335256
		2	24.57
		3	24.7
2	ABA2-OsSCL57-48h	1	24.89	24.86		1.80667	0.285851
		2	24.87
		3	24.82
3	ABA3-OsSCL57-48h	1	24.75	24.7		1.64667	0.319377
		2	24.59
		3	24.76

## Sheet: OsSCL28
qRT-PCR raw data for ABA treatment of OsSCL28
Biological replicates	Sample Name	Technical replicates	Cq	Cq Mean (Technical replicates)	Cq Mean (Biological replicates)	ΔCq	2-ΔCq
1	ABA1-Actin-1h	1	28.11	28.14	28.23
		2	28.17
		3	28.14
2	ABA2-Actin-1h	1	28.39	28.32	28.23
		2	28.26
		3	28.31
3	ABA3-Actin-1h	1	28.23	28.23	28.23
		2	28.2
		3	28.26
1	ABA1-Actin-2h	1	28.29	28.16	28.05
		2	28.07
		3	28.12
2	ABA2-Actin-2h	1	28.1	27.99	28.05
		2	27.95
		3	27.92
3	ABA3-Actin-2h	1	27.98	28.01	28.05
		2	28.03
		3	28.02
1	ABA1-Actin-4h	1	28.5	28.46	28.3
		2	28.47
		3	28.41
2	ABA2-Actin-4h	1	28.08	28.12	28.3
		2	28.12
		3	28.16
3	ABA3-Actin-4h	1	28.44	28.33	28.3
		2	28.28
		3	28.27
1	ABA1-Actin-6h	1	27.92	27.85	27.94
		2	27.76
		3	27.87
2	ABA2-Actin-6h	1	27.97	27.97	27.94
		2	27.86
		3	28.08
3	ABA3-Actin-6h	1	28.12	28.01	27.94
		2	27.93
		3	27.98
1	ABA1-Actin-9h	1	27.67	27.71	27.76
		2	27.64
		3	27.82
2	ABA2-Actin-9h	1	28.01	27.98	27.76
		2	28.04
		3	27.89
3	ABA3-Actin-9h	1	27.6	27.59	27.76
		2	27.54
		3	27.63
1	ABA1-Actin-12h	1	27.75	27.74	27.7533
		2	27.76
		3	27.71
2	ABA2-Actin-12h	1	27.75	27.78	27.7533
		2	27.74
		3	27.85
3	ABA3-Actin-12h	1	27.64	27.74	27.7533
		2	27.72
		3	27.86
1	ABA1-Actin-24h	1	28.15	28.21	27.9833
		2	28.33
		3	28.15
2	ABA2-Actin-24h	1	27.9	27.9	27.9833
		2	27.83
		3	27.97
3	ABA3-Actin-24h	1	27.78	27.84	27.9833
		2	27.78
		3	27.96
1	ABA1-Actin-48h	1	28.27	28.19	28.06
		2	28.17
		3	28.13
2	ABA2-Actin-48h	1	28.13	28.12	28.06
		2	28.03
		3	28.2
3	ABA3-Actin-48h	1	27.9	27.87	28.06
		2	27.89
		3	27.82
1	ABA1-OsSCL28-1h	1	30.84	30.76		2.53	0.173139
		2	30.71
		3	30.73
2	ABA2-OsSCL28-1h	1	30.48	30.48		2.25	0.210224
		2	30.38
		3	30.58
3	ABA3-OsSCL28-1h	1	30.52	30.62		2.39	0.190782
		2	30.7
		3	30.64
1	ABA1-OsSCL28-2h	1	30.04	30.04		1.99	0.251739
		2	30.01
		3	30.07
2	ABA2-OsSCL28-2h	1	29.98	29.99		1.94	0.260616
		2	30.01
		3	29.98
3	ABA3-OsSCL28-2h	1	30.06	30.11		2.06	0.239816
		2	30.07
		3	30.2
1	ABA1-OsSCL28-4h	1	30.07	30.05		1.75	0.297302
		2	30.13
		3	29.95
2	ABA2-OsSCL28-4h	1	29.92	29.94		1.64	0.320856
		2	29.86
		3	30.04
3	ABA3-OsSCL28-4h	1	30.05	29.93		1.63	0.323088
		2	29.87
		3	29.87
1	ABA1-OsSCL28-6h	1	29.25	29.29		1.35	0.392292
		2	29.22
		3	29.4
2	ABA2-OsSCL28-6h	1	29.2	29.14		1.2	0.435275
		2	29.05
		3	29.17
3	ABA3-OsSCL28-6h	1	29.17	29.21		1.27	0.41466
		2	29.33
		3	29.13
1	ABA1-OsSCL28-9h	1	28.76	28.7		0.94	0.521233
		2	28.67
		3	28.67
2	ABA2-OsSCL28-9h	1	28.71	28.71		0.95	0.517632
		2	28.69
		3	28.73
3	ABA3-OsSCL28-9h	1	28.69	28.67		0.91	0.532185
		2	28.65
		3	28.67
1	ABA1-OsSCL28-12h	1	28.76	28.79		1.03667	0.487452
		2	28.9
		3	28.71
2	ABA2-OsSCL28-12h	1	28.85	28.88		1.12667	0.457973
		2	28.85
		3	28.94
3	ABA3-OsSCL28-12h	1	28.79	28.79		1.03667	0.487452
		2	28.81
		3	28.77
1	ABA1-OsSCL28-24h	1	30.07	30.13		2.14667	0.225834
		2	30.1
		3	30.22
2	ABA2-OsSCL28-24h	1	30.5	30.43		2.44667	0.183434
		2	30.32
		3	30.47
3	ABA3-OsSCL28-24h	1	30.56	30.52		2.53667	0.17234
		2	30.57
		3	30.43
1	ABA1-OsSCL28-48h	1	29.77	29.78		1.72	0.303549
		2	29.69
		3	29.88
2	ABA2-OsSCL28-48h	1	30.39	30.47		2.41	0.188156
		2	30.44
		3	30.58
3	ABA3-OsSCL28-48h	1	30.36	30.35		2.29	0.204476
		2	30.45
		3	30.24

## Sheet: OsSCL25
qRT-PCR raw data for ABA treatment of OsSCL25
Biological replicates	Sample Name	Technical replicates	Cq	Cq Mean (Technical replicates)	Cq Mean (Biological replicates)	ΔCq	2-ΔCq
1	ABA1-Actin-1h	1	27.51	27.62	27.66
		2	27.75
		3	27.6
2	ABA2-Actin-1h	1	27.86	27.75	27.66
		2	27.64
		3	27.75
3	ABA3-Actin-1h	1	27.71	27.61	27.66
		2	27.5
		3	27.62
1	ABA1-Actin-2h	1	27.93	27.88	27.8
		2	27.94
		3	27.77
2	ABA2-Actin-2h	1	27.89	27.76	27.8
		2	27.69
		3	27.7
3	ABA3-Actin-2h	1	27.88	27.75	27.8
		2	27.65
		3	27.72
1	ABA1-Actin-4h	1	27.74	27.74	27.75
		2	27.74
		3	27.74
2	ABA2-Actin-4h	1	27.89	27.8	27.75
		2	27.71
		3	27.8
3	ABA3-Actin-4h	1	27.7	27.7	27.75
		2	27.68
		3	27.72
1	ABA1-Actin-6h	1	27.56	27.67	27.63
		2	27.68
		3	27.77
2	ABA2-Actin-6h	1	27.55	27.59	27.63
		2	27.65
		3	27.57
3	ABA3-Actin-6h	1	27.56	27.62	27.63
		2	27.59
		3	27.71
1	ABA1-Actin-9h	1	27.71	27.61	27.64
		2	27.6
		3	27.52
2	ABA2-Actin-9h	1	27.73	27.7	27.64
		2	27.78
		3	27.59
3	ABA3-Actin-9h	1	27.53	27.6	27.64
		2	27.66
		3	27.61
1	ABA1-Actin-12h	1	27.54	27.59	27.51
		2	27.66
		3	27.57
2	ABA2-Actin-12h	1	27.63	27.65	27.51
		2	27.57
		3	27.75
3	ABA3-Actin-12h	1	27.34	27.29	27.51
		2	27.33
		3	27.2
1	ABA1-Actin-24h	1	27.78	27.69	27.74
		2	27.71
		3	27.58
2	ABA2-Actin-24h	1	27.82	27.85	27.74
		2	27.75
		3	27.98
3	ABA3-Actin-24h	1	27.72	27.68	27.74
		2	27.64
		3	27.68
1	ABA1-Actin-48h	1	28.31	28.19	28.06
		2	28.1
		3	28.16
2	ABA2-Actin-48h	1	28.11	28.12	28.06
		2	28.06
		3	28.19
3	ABA3-Actin-48h	1	27.78	27.87	28.06
		2	27.86
		3	27.97
1	ABA1-OsSCL25-1h	1	27.65	27.64		-0.02	1.01396
		2	27.64
		3	27.63
2	ABA2-OsSCL25-1h	1	27.6	27.47		-0.19	1.14076
		2	27.44
		3	27.37
3	ABA3-OsSCL25-1h	1	27.55	27.56		-0.1	1.07177
		2	27.66
		3	27.47
1	ABA1-OsSCL25-2h	1	27.45	27.34		-0.456667	1.37237
		2	27.3
		3	27.27
2	ABA2-OsSCL25-2h	1	27.18	27.17		-0.626667	1.54399
		2	27.19
		3	27.14
3	ABA3-OsSCL25-2h	1	27.24	27.27		-0.526667	1.4406
		2	27.39
		3	27.18
1	ABA1-OsSCL25-4h	1	27.5	27.53		-0.216667	1.16205
		2	27.56
		3	27.53
2	ABA2-OsSCL25-4h	1	27.65	27.57		-0.176667	1.13027
		2	27.49
		3	27.57
3	ABA3-OsSCL25-4h	1	27.49	27.45		-0.296667	1.2283
		2	27.43
		3	27.43
1	ABA1-OsSCL25-6h	1	27.68	27.63		0.00333333	0.997692
		2	27.64
		3	27.57
2	ABA2-OsSCL25-6h	1	27.64	27.65		0.0233333	0.983957
		2	27.68
		3	27.63
3	ABA3-OsSCL25-6h	1	27.62	27.55		-0.0766667	1.05458
		2	27.48
		3	27.55
1	ABA1-OsSCL25-9h	1	28.01	27.99		0.353333	0.782773
		2	27.95
		3	28.01
2	ABA2-OsSCL25-9h	1	28	28.05		0.413333	0.750886
		2	28.12
		3	28.03
3	ABA3-OsSCL25-9h	1	28.07	28.03		0.393333	0.761368
		2	28.1
		3	27.92
1	ABA1-OsSCL25-12h	1	29	29.07		1.56	0.339151
		2	29.04
		3	29.17
2	ABA2-OsSCL25-12h	1	29.28	29.39		1.88	0.271684
		2	29.52
		3	29.37
3	ABA3-OsSCL25-12h	1	29.12	29.01		1.5	0.353553
		2	28.99
		3	28.92
1	ABA1-OsSCL25-24h	1	26.54	26.57		-1.17	2.25012
		2	26.6
		3	26.57
2	ABA2-OsSCL25-24h	1	26.32	26.4		-1.34	2.53151
		2	26.42
		3	26.46
3	ABA3-OsSCL25-24h	1	26.28	26.37		-1.37	2.58471
		2	26.35
		3	26.48
1	ABA1-OsSCL25-48h	1	27.03	27.01		-1.05	2.07053
		2	26.98
		3	27.02
2	ABA2-OsSCL25-48h	1	27.03	27.02		-1.04	2.05623
		2	27.02
		3	27.01
3	ABA3-OsSCL25-48h	1	27.1	27.09		-0.97	1.95884
		2	27.03
		3	27.14

## Sheet: OsSCL26
qRT-PCR raw data for ABA treatment of OsSCL26
Biological replicates	Sample Name	Technical replicates	Cq	Cq Mean (Technical replicates)	Cq Mean (Biological replicates)	ΔCq	2-ΔCq
1	ABA1-Actin-1h	1	23.18	23.16	22.47
		2	23.2
		3	23.1
2	ABA2-Actin-1h	1	22	21.96	22.47
		2	21.94
		3	21.94
3	ABA3-Actin-1h	1	22.24	22.29	22.47
		2	22.35
		3	22.28
1	ABA1-Actin-2h	1	22.96	22.86	22.7667
		2	22.87
		3	22.75
2	ABA2-Actin-2h	1	22.7	22.74	22.7667
		2	22.71
		3	22.81
3	ABA3-Actin-2h	1	22.63	22.7	22.7667
		2	22.82
		3	22.65
1	ABA1-Actin-4h	1	22.75	22.76	22.95
		2	22.73
		3	22.8
2	ABA2-Actin-4h	1	23.15	23.21	22.95
		2	23.29
		3	23.19
3	ABA3-Actin-4h	1	23.01	22.88	22.95
		2	22.79
		3	22.84
1	ABA1-Actin-6h	1	23.21	23.29	23.3867
		2	23.32
		3	23.34
2	ABA2-Actin-6h	1	23.55	23.42	23.3867
		2	23.33
		3	23.38
3	ABA3-Actin-6h	1	23.37	23.45	23.3867
		2	23.58
		3	23.4
1	ABA1-Actin-9h	1	24.26	24.21	23.7433
		2	24.1
		3	24.27
2	ABA2-Actin-9h	1	23.71	23.81	23.7433
		2	23.87
		3	23.85
3	ABA3-Actin-9h	1	23.26	23.21	23.7433
		2	23.26
		3	23.11
1	ABA1-Actin-12h	1	22.82	22.87	23.1933
		2	23
		3	22.79
2	ABA2-Actin-12h	1	23.32	23.39	23.1933
		2	23.49
		3	23.36
3	ABA3-Actin-12h	1	23.42	23.32	23.1933
		2	23.25
		3	23.29
1	ABA1-Actin-24h	1	23.61	23.52	23.1
		2	23.43
		3	23.52
2	ABA2-Actin-24h	1	22.94	22.86	23.1
		2	22.85
		3	22.79
3	ABA3-Actin-24h	1	22.85	22.92	23.1
		2	22.93
		3	22.98
1	ABA1-Actin-48h	1	22.51	22.5	23.0533
		2	22.5
		3	22.49
2	ABA2-Actin-48h	1	23.37	23.28	23.0533
		2	23.2
		3	23.27
3	ABA3-Actin-48h	1	23.32	23.38	23.0533
		2	23.39
		3	23.43
1	ABA1-OsSCL26-1h	1	23.87	23.8		1.33	0.397768
		2	23.75
		3	23.78
2	ABA2-OsSCL26-1h	1	24.26	24.21		1.74	0.29937
		2	24.11
		3	24.26
3	ABA3-OsSCL26-1h	1	24.36	24.3		1.83	0.281265
		2	24.3
		3	24.24
1	ABA1-OsSCL26-2h	1	23.92	23.99		1.22333	0.428292
		2	23.99
		3	24.06
2	ABA2-OsSCL26-2h	1	23.93	23.87		1.10333	0.46544
		2	23.85
		3	23.83
3	ABA3-OsSCL26-2h	1	23.67	23.78		1.01333	0.4954
		2	23.9
		3	23.77
1	ABA1-OsSCL26-4h	1	23.78	23.87		0.92	0.528509
		2	23.86
		3	23.97
2	ABA2-OsSCL26-4h	1	23.53	23.59		0.64	0.641713
		2	23.56
		3	23.68
3	ABA3-OsSCL26-4h	1	23.49	23.49		0.54	0.687771
		2	23.39
		3	23.59
1	ABA1-OsSCL26-6h	1	23.82	23.79		0.403333	0.756109
		2	23.69
		3	23.86
2	ABA2-OsSCL26-6h	1	23.89	23.8		0.413333	0.750886
		2	23.71
		3	23.8
3	ABA3-OsSCL26-6h	1	23.39	23.33		-0.0566667	1.04006
		2	23.3
		3	23.3
1	ABA1-OsSCL26-9h	1	23.68	23.63		-0.113333	1.08172
		2	23.6
		3	23.61
2	ABA2-OsSCL26-9h	1	24.01	23.95		0.206667	0.866537
		2	23.89
		3	23.95
3	ABA3-OsSCL26-9h	1	24.23	24.29		0.546667	0.6846
		2	24.32
		3	24.32
1	ABA1-OsSCL26-12h	1	23.69	23.72		0.526667	0.694157
		2	23.81
		3	23.66
2	ABA2-OsSCL26-12h	1	24.46	24.35		1.15667	0.448548
		2	24.3
		3	24.29
3	ABA3-OsSCL26-12h	1	23.79	23.86		0.666667	0.629961
		2	23.82
		3	23.97
1	ABA1-OsSCL26-24h	1	23.89	23.97		0.87	0.547147
		2	24.04
		3	23.98
2	ABA2-OsSCL26-24h	1	23.81	23.77		0.67	0.628507
		2	23.77
		3	23.73
3	ABA3-OsSCL26-24h	1	23.98	23.99		0.89	0.539614
		2	23.98
		3	24.01
1	ABA1-OsSCL26-48h	1	23.6	23.62		0.566667	0.675175
		2	23.74
		3	23.52
2	ABA2-OsSCL26-48h	1	23.7	23.57		0.516667	0.698985
		2	23.46
		3	23.55
3	ABA3-OsSCL26-48h	1	23.57	23.46		0.406667	0.754364
		2	23.39
		3	23.42

## Sheet: OsSC32
qRT-PCR raw data for ABA treatment of OsSC32
Biological replicates	Sample Name	Technical replicates	Cq	Cq Mean (Technical replicates)	Cq Mean (Biological replicates)	ΔCq	2-ΔCq
1	ABA1-Actin-1h	1	23.07	23.16	22.47
		2	23.15
		3	23.26
2	ABA2-Actin-1h	1	21.84	21.96	22.47
		2	22.03
		3	22.01
3	ABA3-Actin-1h	1	22.4	22.29	22.47
		2	22.29
		3	22.18
1	ABA1-Actin-2h	1	22.82	22.86	22.7667
		2	22.81
		3	22.95
2	ABA2-Actin-2h	1	22.64	22.74	22.7667
		2	22.85
		3	22.73
3	ABA3-Actin-2h	1	22.75	22.7	22.7667
		2	22.59
		3	22.76
1	ABA1-Actin-4h	1	22.75	22.76	22.95
		2	22.73
		3	22.8
2	ABA2-Actin-4h	1	23.2	23.21	22.95
		2	23.11
		3	23.32
3	ABA3-Actin-4h	1	22.85	22.88	22.95
		2	22.98
		3	22.81
1	ABA1-Actin-6h	1	23.18	23.29	23.3867
		2	23.39
		3	23.3
2	ABA2-Actin-6h	1	23.54	23.42	23.3867
		2	23.33
		3	23.39
3	ABA3-Actin-6h	1	23.37	23.45	23.3867
		2	23.5
		3	23.48
1	ABA1-Actin-9h	1	24.21	24.21	23.7433
		2	24.11
		3	24.31
2	ABA2-Actin-9h	1	23.94	23.81	23.7433
		2	23.79
		3	23.7
3	ABA3-Actin-9h	1	23.17	23.21	23.7433
		2	23.33
		3	23.13
1	ABA1-Actin-12h	1	22.86	22.87	23.1933
		2	22.79
		3	22.96
2	ABA2-Actin-12h	1	23.48	23.39	23.1933
		2	23.41
		3	23.28
3	ABA3-Actin-12h	1	23.23	23.32	23.1933
		2	23.45
		3	23.28
1	ABA1-Actin-24h	1	23.52	23.52	23.1
		2	23.59
		3	23.45
2	ABA2-Actin-24h	1	22.95	22.86	23.1
		2	22.81
		3	22.82
3	ABA3-Actin-24h	1	22.94	22.92	23.1
		2	22.84
		3	22.98
1	ABA1-Actin-48h	1	22.61	22.5	23.0533
		2	22.39
		3	22.5
2	ABA2-Actin-48h	1	23.23	23.28	23.0533
		2	23.28
		3	23.33
3	ABA3-Actin-48h	1	23.34	23.38	23.0533
		2	23.5
		3	23.3
1	ABA1-OsSC32-1h	1	22.81	22.79		0.32	0.80107
		2	22.73
		3	22.83
2	ABA2-OsSC32-1h	1	22.88	22.92		0.45	0.732043
		2	22.84
		3	23.04
3	ABA3-OsSC32-1h	1	22.64	22.69		0.22	0.858565
		2	22.82
		3	22.61
1	ABA1-OsSC32-2h	1	23	22.92		0.153333	0.899171
		2	22.93
		3	22.83
2	ABA2-OsSC32-2h	1	22.6	22.66		-0.106667	1.07674
		2	22.67
		3	22.71
3	ABA3-OsSC32-2h	1	22.67	22.65		-0.116667	1.08423
		2	22.55
		3	22.73
1	ABA1-OsSC32-4h	1	22.74	22.75		-0.2	1.1487
		2	22.77
		3	22.74
2	ABA2-OsSC32-4h	1	22.72	22.69		-0.26	1.19748
		2	22.67
		3	22.68
3	ABA3-OsSC32-4h	1	22.62	22.53		-0.42	1.33793
		2	22.43
		3	22.54
1	ABA1-OsSC32-6h	1	22.95	22.87		-0.516667	1.43065
		2	22.77
		3	22.89
2	ABA2-OsSC32-6h	1	22.67	22.68		-0.706667	1.63203
		2	22.61
		3	22.76
3	ABA3-OsSC32-6h	1	22.88	22.99		-0.396667	1.31646
		2	23.12
		3	22.97
1	ABA1-OsSC32-9h	1	22.54	22.57		-1.17333	2.25532
		2	22.61
		3	22.56
2	ABA2-OsSC32-9h	1	22.42	22.39		-1.35333	2.55502
		2	22.34
		3	22.41
3	ABA3-OsSC32-9h	1	22.67	22.6		-1.14333	2.20891
		2	22.55
		3	22.58
1	ABA1-OsSC32-12h	1	22.85	22.75		-0.443333	1.35974
		2	22.73
		3	22.67
2	ABA2-OsSC32-12h	1	22.97	22.88		-0.313333	1.24258
		2	22.82
		3	22.85
3	ABA3-OsSC32-12h	1	22.61	22.69		-0.503333	1.41748
		2	22.69
		3	22.77
1	ABA1-OsSC32-24h	1	22.47	22.42		-0.68	1.60214
		2	22.36
		3	22.43
2	ABA2-OsSC32-24h	1	22.79	22.88		-0.22	1.16473
		2	22.86
		3	22.99
3	ABA3-OsSC32-24h	1	22.76	22.73		-0.37	1.29235
		2	22.79
		3	22.64
1	ABA1-OsSC32-48h	1	22.26	22.37		-0.683333	1.60585
		2	22.46
		3	22.39
2	ABA2-OsSC32-48h	1	22.21	22.27		-0.783333	1.7211
		2	22.31
		3	22.29
3	ABA3-OsSC32-48h	1	21.64	21.75		-1.30333	2.46798
		2	21.87
		3	21.74

## Sheet: OsSC34
qRT-PCR raw data for ABA treatment of OsSC34
Biological replicates	Sample Name	Technical replicates	Cq	Cq Mean (Technical replicates)	Cq Mean (Biological replicates)	ΔCq	2-ΔCq
1	ABA1-Actin-1h	1	23.09	23.16	22.47
		2	23.26
		3	23.13
2	ABA2-Actin-1h	1	22.01	21.96	22.47
		2	22
		3	21.87
3	ABA3-Actin-1h	1	22.33	22.29	22.47
		2	22.24
		3	22.3
1	ABA1-Actin-2h	1	22.86	22.86	22.7667
		2	22.8
		3	22.92
2	ABA2-Actin-2h	1	22.65	22.74	22.7667
		2	22.87
		3	22.7
3	ABA3-Actin-2h	1	22.77	22.7	22.7667
		2	22.61
		3	22.72
1	ABA1-Actin-4h	1	22.76	22.76	22.95
		2	22.69
		3	22.83
2	ABA2-Actin-4h	1	23.31	23.21	22.95
		2	23.13
		3	23.19
3	ABA3-Actin-4h	1	22.91	22.88	22.95
		2	22.87
		3	22.86
1	ABA1-Actin-6h	1	23.26	23.29	23.3867
		2	23.34
		3	23.27
2	ABA2-Actin-6h	1	23.4	23.42	23.3867
		2	23.47
		3	23.39
3	ABA3-Actin-6h	1	23.35	23.45	23.3867
		2	23.45
		3	23.55
1	ABA1-Actin-9h	1	24.23	24.21	23.7433
		2	24.22
		3	24.18
2	ABA2-Actin-9h	1	23.8	23.81	23.7433
		2	23.75
		3	23.88
3	ABA3-Actin-9h	1	23.32	23.21	23.7433
		2	23.11
		3	23.2
1	ABA1-Actin-12h	1	22.86	22.87	23.1933
		2	22.83
		3	22.92
2	ABA2-Actin-12h	1	23.46	23.39	23.1933
		2	23.34
		3	23.37
3	ABA3-Actin-12h	1	23.41	23.32	23.1933
		2	23.33
		3	23.22
1	ABA1-Actin-24h	1	23.55	23.52	23.1
		2	23.52
		3	23.49
2	ABA2-Actin-24h	1	22.91	22.86	23.1
		2	22.84
		3	22.83
3	ABA3-Actin-24h	1	23.03	22.92	23.1
		2	22.91
		3	22.82
1	ABA1-Actin-48h	1	22.61	22.5	23.0533
		2	22.44
		3	22.45
2	ABA2-Actin-48h	1	23.21	23.28	23.0533
		2	23.34
		3	23.29
3	ABA3-Actin-48h	1	23.4	23.38	23.0533
		2	23.36
		3	23.38
1	ABA1-OsSC34-1h	1	24.44	24.39		1.92	0.264255
		2	24.35
		3	24.38
2	ABA2-OsSC34-1h	1	24.41	24.41		1.94	0.260616
		2	24.31
		3	24.51
3	ABA3-OsSC34-1h	1	24.5	24.57		2.1	0.233258
		2	24.55
		3	24.66
1	ABA1-OsSC34-2h	1	23.6	23.59		0.823333	0.565135
		2	23.59
		3	23.58
2	ABA2-OsSC34-2h	1	23.54	23.58		0.813333	0.569066
		2	23.71
		3	23.49
3	ABA3-OsSC34-2h	1	23.51	23.53		0.763333	0.589134
		2	23.52
		3	23.56
1	ABA1-OsSC34-4h	1	23.9	23.91		0.96	0.514057
		2	23.93
		3	23.9
2	ABA2-OsSC34-4h	1	23.82	23.82		0.87	0.547147
		2	23.8
		3	23.84
3	ABA3-OsSC34-4h	1	23.43	23.53		0.58	0.668964
		2	23.53
		3	23.63
1	ABA1-OsSC34-6h	1	23.48	23.53		0.143333	0.905425
		2	23.5
		3	23.61
2	ABA2-OsSC34-6h	1	22.98	22.9		-0.486667	1.4012
		2	22.9
		3	22.82
3	ABA3-OsSC34-6h	1	22.7	22.68		-0.706667	1.63203
		2	22.62
		3	22.72
1	ABA1-OsSC34-9h	1	22.87	22.76		-0.983333	1.97703
		2	22.71
		3	22.7
2	ABA2-OsSC34-9h	1	22.76	22.75		-0.993333	1.99078
		2	22.7
		3	22.79
3	ABA3-OsSC34-9h	1	23.64	23.57		-0.173333	1.12766
		2	23.54
		3	23.53
1	ABA1-OsSC34-12h	1	22.23	22.17		-1.02333	2.03261
		2	22.16
		3	22.12
2	ABA2-OsSC34-12h	1	21.91	21.99		-1.20333	2.30271
		2	22.06
		3	22
3	ABA3-OsSC34-12h	1	21.51	21.53		-1.66333	3.16748
		2	21.51
		3	21.57
1	ABA1-OsSC34-24h	1	23.34	23.38		0.28	0.823591
		2	23.35
		3	23.45
2	ABA2-OsSC34-24h	1	23.37	23.41		0.31	0.806642
		2	23.54
		3	23.32
3	ABA3-OsSC34-24h	1	22.59	22.62		-0.48	1.39474
		2	22.52
		3	22.75
1	ABA1-OsSC34-48h	1	22.75	22.8		-0.253333	1.19196
		2	22.79
		3	22.86
2	ABA2-OsSC34-48h	1	22.46	22.38		-0.673333	1.59475
		2	22.28
		3	22.4
3	ABA3-OsSC34-48h	1	22.79	22.81		-0.243333	1.18372
		2	22.76
		3	22.88

## Sheet: OsSC25
qRT-PCR raw data for ABA treatment of OsSC25
Biological replicates	Sample Name	Technical replicates	Cq	Cq Mean (Technical replicates)	Cq Mean (Biological replicates)	ΔCq	2-ΔCq
1	ABA1-Actin-1h	1	23.09	23.16	22.47
		2	23.12
		3	23.27
2	ABA2-Actin-1h	1	21.96	21.96	22.47
		2	21.88
		3	22.04
3	ABA3-Actin-1h	1	22.27	22.29	22.47
		2	22.42
		3	22.18
1	ABA1-Actin-2h	1	22.8	22.86	22.7667
		2	22.97
		3	22.81
2	ABA2-Actin-2h	1	22.67	22.74	22.7667
		2	22.77
		3	22.78
3	ABA3-Actin-2h	1	22.59	22.7	22.7667
		2	22.79
		3	22.72
1	ABA1-Actin-4h	1	22.74	22.76	22.95
		2	22.81
		3	22.73
2	ABA2-Actin-4h	1	23.21	23.21	22.95
		2	23.15
		3	23.27
3	ABA3-Actin-4h	1	22.91	22.88	22.95
		2	22.85
		3	22.88
1	ABA1-Actin-6h	1	23.29	23.29	23.3867
		2	23.38
		3	23.2
2	ABA2-Actin-6h	1	23.39	23.42	23.3867
		2	23.37
		3	23.5
3	ABA3-Actin-6h	1	23.42	23.45	23.3867
		2	23.49
		3	23.44
1	ABA1-Actin-9h	1	24.33	24.21	23.7433
		2	24.19
		3	24.11
2	ABA2-Actin-9h	1	23.76	23.81	23.7433
		2	23.88
		3	23.79
3	ABA3-Actin-9h	1	23.13	23.21	23.7433
		2	23.27
		3	23.23
1	ABA1-Actin-12h	1	22.91	22.87	23.1933
		2	22.85
		3	22.85
2	ABA2-Actin-12h	1	23.31	23.39	23.1933
		2	23.38
		3	23.48
3	ABA3-Actin-12h	1	23.43	23.32	23.1933
		2	23.23
		3	23.3
1	ABA1-Actin-24h	1	23.55	23.52	23.1
		2	23.53
		3	23.48
2	ABA2-Actin-24h	1	22.79	22.86	23.1
		2	22.85
		3	22.94
3	ABA3-Actin-24h	1	22.86	22.92	23.1
		2	22.91
		3	22.99
1	ABA1-Actin-48h	1	22.56	22.5	23.0533
		2	22.47
		3	22.47
2	ABA2-Actin-48h	1	23.23	23.28	23.0533
		2	23.2
		3	23.41
3	ABA3-Actin-48h	1	23.49	23.38	23.0533
		2	23.29
		3	23.36
1	ABA1-OsSC25-1h	1	28.76	28.71		6.24	0.0132304
		2	28.75
		3	28.62
2	ABA2-OsSC25-1h	1	28.79	28.66		6.19	0.013697
		2	28.57
		3	28.62
3	ABA3-OsSC25-1h	1	28.61	28.67		6.2	0.0136024
		2	28.78
		3	28.62
1	ABA1-OsSC25-2h	1	28.75	28.8		6.03333	0.0152681
		2	28.73
		3	28.92
2	ABA2-OsSC25-2h	1	29.05	29		6.23333	0.0132917
		2	29.01
		3	28.94
3	ABA3-OsSC25-2h	1	29.33	29.29		6.52333	0.0108713
		2	29.21
		3	29.33
1	ABA1-OsSC25-4h	1	28.11	28		5.05	0.0301855
		2	27.94
		3	27.95
2	ABA2-OsSC25-4h	1	28.49	28.51		5.56	0.0211969
		2	28.45
		3	28.59
3	ABA3-OsSC25-4h	1	28.46	28.52		5.57	0.0210505
		2	28.59
		3	28.51
1	ABA1-OsSC25-6h	1	27.86	27.88		4.49333	0.0443989
		2	27.79
		3	27.99
2	ABA2-OsSC25-6h	1	28.26	28.14		4.75333	0.037077
		2	28.13
		3	28.03
3	ABA3-OsSC25-6h	1	27.31	27.35		3.96333	0.0641088
		2	27.45
		3	27.29
1	ABA1-OsSC25-9h	1	26.99	26.94		3.19667	0.109071
		2	26.85
		3	26.98
2	ABA2-OsSC25-9h	1	27.21	27.3		3.55667	0.0849839
		2	27.31
		3	27.38
3	ABA3-OsSC25-9h	1	27.55	27.57		3.82667	0.0704788
		2	27.57
		3	27.59
1	ABA1-OsSC25-12h	1	26.26	26.37		3.17667	0.110593
		2	26.38
		3	26.47
2	ABA2-OsSC25-12h	1	27.04	26.99		3.79667	0.0719597
		2	27.03
		3	26.9
3	ABA3-OsSC25-12h	1	26.2	26.24		3.04667	0.121021
		2	26.31
		3	26.21
1	ABA1-OsSC25-24h	1	27.69	27.8		4.7	0.0384733
		2	27.87
		3	27.84
2	ABA2-OsSC25-24h	1	27.75	27.79		4.69	0.0387409
		2	27.77
		3	27.85
3	ABA3-OsSC25-24h	1	27.63	27.57		4.47	0.0451228
		2	27.46
		3	27.62
1	ABA1-OsSC25-48h	1	27.22	27.26		4.20667	0.0541586
		2	27.32
		3	27.24
2	ABA2-OsSC25-48h	1	27.32	27.28		4.22667	0.0534129
		2	27.35
		3	27.17
3	ABA3-OsSC25-48h	1	27.28	27.39		4.33667	0.0494918
		2	27.43
		3	27.46

## Sheet: OsSR45a
qRT-PCR raw data for ABA treatment of OsSR45a
Biological replicates	Sample Name	Technical replicates	Cq	Cq Mean (Technical replicates)	Cq Mean (Biological replicates)	ΔCq	2-ΔCq
1	ABA1-Actin-1h	1	23.25	23.16	22.47
		2	23.11
		3	23.12
2	ABA2-Actin-1h	1	21.99	21.96	22.47
		2	22
		3	21.89
3	ABA3-Actin-1h	1	22.29	22.29	22.47
		2	22.27
		3	22.31
1	ABA1-Actin-2h	1	22.89	22.86	22.7667
		2	22.89
		3	22.8
2	ABA2-Actin-2h	1	22.74	22.74	22.7667
		2	22.7
		3	22.78
3	ABA3-Actin-2h	1	22.59	22.7	22.7667
		2	22.72
		3	22.79
1	ABA1-Actin-4h	1	22.72	22.76	22.95
		2	22.85
		3	22.71
2	ABA2-Actin-4h	1	23.19	23.21	22.95
		2	23.2
		3	23.24
3	ABA3-Actin-4h	1	22.83	22.88	22.95
		2	22.89
		3	22.92
1	ABA1-Actin-6h	1	23.25	23.29	23.3867
		2	23.25
		3	23.37
2	ABA2-Actin-6h	1	23.41	23.42	23.3867
		2	23.42
		3	23.43
3	ABA3-Actin-6h	1	23.43	23.45	23.3867
		2	23.39
		3	23.53
1	ABA1-Actin-9h	1	24.33	24.21	23.7433
		2	24.2
		3	24.1
2	ABA2-Actin-9h	1	23.76	23.81	23.7433
		2	23.87
		3	23.8
3	ABA3-Actin-9h	1	23.14	23.21	23.7433
		2	23.34
		3	23.15
1	ABA1-Actin-12h	1	22.98	22.87	23.1933
		2	22.79
		3	22.84
2	ABA2-Actin-12h	1	23.34	23.39	23.1933
		2	23.35
		3	23.48
3	ABA3-Actin-12h	1	23.21	23.32	23.1933
		2	23.31
		3	23.44
1	ABA1-Actin-24h	1	23.5	23.52	23.1
		2	23.43
		3	23.63
2	ABA2-Actin-24h	1	22.81	22.86	23.1
		2	22.83
		3	22.94
3	ABA3-Actin-24h	1	23.05	22.92	23.1
		2	22.81
		3	22.9
1	ABA1-Actin-48h	1	22.49	22.5	23.0533
		2	22.52
		3	22.49
2	ABA2-Actin-48h	1	23.26	23.28	23.0533
		2	23.26
		3	23.32
3	ABA3-Actin-48h	1	23.41	23.38	23.0533
		2	23.37
		3	23.36
1	ABA1-OsSR45a-1h	1	20.03	19.92		-2.55	5.85634
		2	19.84
		3	19.89
2	ABA2-OsSR45a-1h	1	20.67	20.64		-1.83	3.55537
		2	20.65
		3	20.6
3	ABA3-OsSR45a-1h	1	20.43	20.36		-2.11	4.31691
		2	20.26
		3	20.39
1	ABA1-OsSR45a-2h	1	20.61	20.5		-2.26667	4.8121
		2	20.47
		3	20.42
2	ABA2-OsSR45a-2h	1	20.31	20.25		-2.51667	5.72258
		2	20.21
		3	20.23
3	ABA3-OsSR45a-2h	1	20.16	20.25		-2.51667	5.72258
		2	20.25
		3	20.34
1	ABA1-OsSR45a-4h	1	19.88	19.96		-2.99	7.94474
		2	19.92
		3	20.08
2	ABA2-OsSR45a-4h	1	20.39	20.3		-2.65	6.27667
		2	20.27
		3	20.24
3	ABA3-OsSR45a-4h	1	20.53	20.47		-2.48	5.57897
		2	20.38
		3	20.5
1	ABA1-OsSR45a-6h	1	20.24	20.29		-3.09667	8.5544
		2	20.38
		3	20.25
2	ABA2-OsSR45a-6h	1	19.96	19.94		-3.44667	10.9031
		2	19.97
		3	19.89
3	ABA3-OsSR45a-6h	1	20.32	20.32		-3.06667	8.37835
		2	20.3
		3	20.34
1	ABA1-OsSR45a-9h	1	19.65	19.73		-4.01333	16.1486
		2	19.69
		3	19.85
2	ABA2-OsSR45a-9h	1	19.37	19.45		-4.29333	19.6075
		2	19.43
		3	19.55
3	ABA3-OsSR45a-9h	1	19.3	19.37		-4.37333	20.7255
		2	19.33
		3	19.48
1	ABA1-OsSR45a-12h	1	19.8	19.79		-3.40333	10.5805
		2	19.79
		3	19.78
2	ABA2-OsSR45a-12h	1	19.73	19.8		-3.39333	10.5074
		2	19.79
		3	19.88
3	ABA3-OsSR45a-12h	1	19.39	19.46		-3.73333	13.2998
		2	19.59
		3	19.4
1	ABA1-OsSR45a-24h	1	20.32	20.2		-2.9	7.46426
		2	20.12
		3	20.16
2	ABA2-OsSR45a-24h	1	19.91	19.93		-3.17	9.00047
		2	20.05
		3	19.83
3	ABA3-OsSR45a-24h	1	20.34	20.4		-2.7	6.49802
		2	20.44
		3	20.42
1	ABA1-OsSR45a-48h	1	19.45	19.43		-3.62333	12.3234
		2	19.44
		3	19.4
2	ABA2-OsSR45a-48h	1	19.64	19.69		-3.36333	10.2912
		2	19.81
		3	19.62
3	ABA3-OsSR45a-48h	1	20.22	20.23		-2.82333	7.07796
		2	20.13
		3	20.34

[truncated: 14 more sheets: OsSR45, OsRS2Z39, OsRS2Z37, OsRS2Z36, OsRS2Z38, OsRSZ21a, OsRSZ21, OsRSZ23, OsRS29, OsRS33, OsSR33, OsSR32, OsSR33a, OsSR40]
