# Supplementary material for: Comprehensive study of serine/arginine-rich (SR) gene family in rice: characterization, evolution and expression analysis
Source: PeerJ. 2023 Oct 13;11:e16193. doi: 10.7717/peerj.16193 (PMC10578304; doi:10.7717/peerj.16193)
Supplement: Supplemental Information 1 [file peerj-11-16193-s001.xlsx]

## Sheet: Sheet1
Table S1 Summary of alternative splicing events in rice serine/arginine-rich (SR) genes according to the information from MSU-RGAP and RAP DB.
Subfamily	Gene	MSU_Locus											RAP DB
		MSU_Locus	Alt.	Alt.	ES	IR	AP	AT	5'-UTR	3'-UTR	Coding	Predicted protein sizes	RAP_Locus	Alt.	Alt.	ES	IR	AP	AT	5'-UTR	3'-UTR	Coding	Predicted protein sizes
			5'- S	3'- S										5'- S	3'- S
SCL subfamily	OsSCL30a	LOC_Os02g15310	1	1		1	2		3		2	265, 227, 168	Os02g0252100*										265
	OsSCL30	LOC_Os12g38430*										263	Os12g0572400					1				1	263, 108
	OsSCL57	LOC_Os11g47830						1		1		502, 477	Os11g0704700*										511
	OsSCL28	LOC_Os03g24890						1			1	243, 238	Os03g0363800*										243
	OsSCL25	LOC_Os07g43950*										213	Os07g0633200					1	1	1	1		213
	OsSCL26	LOC_Os03g25770		1			1		1		1	218, 217	Os03g0374575*										217
SC subfamily	OsSC32	LOC_Os07g43050		1		1				1	1	275, 268	Os07g0623300*										275
	OsSC34	LOC_Os08g37960		1		1		2	1	3		289, 282	Os08g0486200						1		1		289
	OsSC25	LOC_Os03g27030		1			1	1		1	2	206, 205, 184	Os03g0388000		1			1		1		1	205184
SR45 subfamily	OsSR45a	LOC_Os05g01540		1							1	406, 405	Os05g0105900*										380
	OsSR45	LOC_Os01g72890		1							1	432, 431	Os01g0959000*										432
RS2Z subfamily	OsRS2Z39	LOC_Os05g07000*										338	Os05g0162600*										338
	OsRS2Z37	LOC_Os01g06290	1			1	3	3	5	2	1	324, 276, 208	Os01g0155600					1		1			324
	OsRS2Z36	LOC_Os05g02880*										323	Os05g0120100					1	1		1	1	323, 311
	OsRS2Z38	LOC_Os03g17710	1					1		1	1	335, 330	Os03g0285900*										330
RSZ subfamily	OsRSZ21a	LOC_Os06g08840	1	5	1		7	6	12	8		185, 179	Os06g0187900					1	1	1	1		185
	OsRSZ21	LOC_Os02g54770						1		1		185	Os02g0789400					1	1	1	1		185
	OsRSZ23	LOC_Os02g39720		3			1	1	1	1	3	203, 200	Os02g0610600*										200
RS subfamily	OsRS29	LOC_Os04g02870				2	3	3	3	3	2	245, 235	Os04g0118900*										245
	OsRS33	LOC_Os02g03040		2		1		1	1		3	279, 273, 249, 246	Os02g0122800				1		1		1		279, 249
SR subfamily	OsSR33	LOC_Os07g47630		5		6	3	1	2	12	1	296, 254, 246	Os07g0673500		1		1	1	1			2	296, 254
	OsSR32	LOC_Os03g22380						2			2	286, 246, 236	Os03g0344100			1		1		1		1	286, 264
	OsSR33a	LOC_Os05g30140				1					1	294, 287	Os05g0364600*										319
	OsSR40	LOC_Os01g21420*										292	Os01g0316550*										133
(1) Alt.5'- S, alternative 5'- splice site; Alt.3'- S, alternative 3'- splice site; ES, exon skipping; IR, intron retention; AP, Alternate promoter；AT, Alternate terminator.
(2) Numbers in bold indicate the size of the full-length protein.
(3) Genes marked with * indicate the that they do not undergo alternative splicing.
