# Supplementary material for: Comprehensive study of serine/arginine-rich (SR) gene family in rice: characterization, evolution and expression analysis
Source: PeerJ. 2023 Oct 13;11:e16193. doi: 10.7717/peerj.16193 (PMC10578304; doi:10.7717/peerj.16193)
Supplement: Supplemental Information 2 [file peerj-11-16193-s002.xlsx]

## Sheet: Sheet1
Table S2 Description of protein structure prediction on Swiss-Model.
OsSR protein	Template	GMQE	Similarity %	Details of the predicted model
OsSCL30a	2kn4.1.A	0.19	0.4419	https://swissmodel.expasy.org/templates/2kn4.1
OsSCL30	6qx9.6.A	0.18	0.2558	https://swissmodel.expasy.org/templates/6qx9.6
OsSCL57	2leb.1.A	0.07	0.4512	https://swissmodel.expasy.org/templates/2leb.1
OsSCL28	2rra.1.A	0.2	0.3333	https://swissmodel.expasy.org/templates/2rra.1
OsSCL25	6qx9.6.A	0.22	0.3256	https://swissmodel.expasy.org/templates/6qx9.6
OsSCL26	5z58.1.5	0.19	0.283	https://swissmodel.expasy.org/templates/5z58.1
OsSC32	2rne.1.A	0.17	0.2386	https://swissmodel.expasy.org/templates/2rne.1
OsSC34	7dvq.1.a	0.16	0.2614	https://swissmodel.expasy.org/templates/7dvq.1
OsSC25	4qqb.1.B	0.25	0.3563	https://swissmodel.expasy.org/templates/4qqb.1
OsSR45a	5ifn.1.A	0.1	0.35	https://swissmodel.expasy.org/templates/5ifn.1
OsSR45	2rra.1.A	0.1	0.2381	https://swissmodel.expasy.org/templates/2rra.1
OsRS2Z39	3ts0.1.A	0.13	0.2051	https://swissmodel.expasy.org/templates/3ts0.1
OsRS2Z37	1x4a.1.A	0.15	0.4868	https://swissmodel.expasy.org/templates/1x4a.1
OsRS2Z36	1x4a.1.A	0.15	0.4675	https://swissmodel.expasy.org/templates/1x4a.1
OsRS2Z38	1x4a.1.A	0.14	0.4667	https://swissmodel.expasy.org/templates/1x4a.1
OsRSZ21a	6gd1.1.A	0.21	0.2535	https://swissmodel.expasy.org/templates/6gd1.1
OsRSZ21	2i38.1.A	0.22	0.5909	https://swissmodel.expasy.org/templates/2i38.1
OsRSZ23	3to8.1.A	0.16	0.2029	https://swissmodel.expasy.org/templates/3to8.1
OsRS29	6y53.1.H	0.31	0.3179	https://swissmodel.expasy.org/templates/6y53.1
OsRS33	6kor.1.A	0.35	0.2813	https://swissmodel.expasy.org/templates/6kor.1
OsSR33	5ifm.2.B	0.29	0.2878	https://swissmodel.expasy.org/templates/5ifm.2
OsSR32	5z58.1.5	0.2	0.3113	https://swissmodel.expasy.org/templates/5z58.1
OsSR33a	5z58.1.5	0.19	0.283	https://swissmodel.expasy.org/templates/5z58.1
OsSR40	7lrq.1.A	0.24	0.2222	https://swissmodel.expasy.org/templates/7lrq.1
