# Supplementary material for: Comprehensive study of serine/arginine-rich (SR) gene family in rice: characterization, evolution and expression analysis
Source: PeerJ. 2023 Oct 13;11:e16193. doi: 10.7717/peerj.16193 (PMC10578304; doi:10.7717/peerj.16193)
Supplement: Supplemental Information 3 [file peerj-11-16193-s003.xlsx]

## Sheet: Sheet1
Table S3 The Ka/Ks values of SR gene pairs in rice.
Seq_1	Seq_2	Ka	Ks	Ka/Ks
OsSR33a	OsSR33	0.314161	1.75875	0.178627
OsSR40	OsSR32	0.195985	1.53621	0.127577
OsRSZ21a	OsRSZ21	0.0781278	0.850212	0.0918922
OsSCL30	OsSCL57	0.313834	1.06489	0.294711
OsRS2Z37	OsRS2Z39	0.412913	1.39515	0.295964
OsSR45a	OsSR45	0.258538	0.981111	0.263515
