# Supplementary material for: Comprehensive study of serine/arginine-rich (SR) gene family in rice: characterization, evolution and expression analysis
Source: PeerJ. 2023 Oct 13;11:e16193. doi: 10.7717/peerj.16193 (PMC10578304; doi:10.7717/peerj.16193)
Supplement: Supplemental Information 4 [file peerj-11-16193-s004.xlsx]

## Sheet: sheet1
Table S4 The orthologous gene pairs of SR genes between rice and other four plant spieces.
	Gene name	Subfamily	Chr	Gene ID	Gene name	Subfamily	Chr	Gene ID
Oryza sativa-Arabidopsis thaliana	OsSR33a	SR	5	Os05g0364600	AtSR34	SR	1	AT1G02840
	OsSR33	SR	7	Os07g0673500	AtSR34	SR	1	AT1G02840
	OsRS2Z36	RS2Z	5	Os05g0120100	AtRS2Z33	RS2Z	2	AT2G37340
	OsRS2Z36	RS2Z	5	Os05g0120100	AtRS2Z32	RS2Z	3	AT3G53500
Oryza sativa-Sorghum bicolor	OsSR33a	SR	5	Os05g0364600	SR27	SR	3	KXG32406
	OsSR33a	SR	5	Os05g0364600	SR30	SR	9	KXG21829
	OsSR33	SR	7	Os07g0673500	SR32	SR	1	EER94870
	OsSR32	SR	3	Os03g0344100	SR32	SR	1	EER94870
	OsSR40	SR	1	Os01g0316600	SR27	SR	3	KXG32406
	OsSR40	SR	1	Os01g0316600	SR30	SR	9	KXG21829
	OsRSZ21a	RSZ	6	Os06g0187900	RSZ21	RSZ	10	EER89357
	OsRSZ21a	RSZ	6	Os06g0187900	RSZ19	RSZ	4	EES07659
	OsRSZ21	RSZ	2	Os02g0789400	RSZ21	RSZ	10	EER89357
	OsRSZ21	RSZ	2	Os02g0789400	RSZ19	RSZ	4	EES07659
	OsRSZ23	RSZ	2	Os02g0610600	RSZ28	RSZ	4	OQU85289
	OsSC34	SC	8	Os08g0486200	SC31	SC	7	KXG25727
	OsSC32	SC	7	Os07g0623300	SC35	SC	1	KXG39239
	OsSC32	SC	7	Os07g0623300	SC30	SC	2	KXG36733
	OsSC25	SC	3	Os03g0388000	SC35	SC	1	KXG39239
	OsSC25	SC	3	Os03g0388000	SC30	SC	2	KXG36733
	OsSCL25	SCL	7	Os07g0633200	SCL25a	SCL	1	EER92211
	OsSCL25	SCL	7	Os07g0633200	SCL25b	SCL	2	EER97602
	OsSCL26	SCL	3	Os03g0374575	SCL25a	SCL	1	EER92211
	OsSCL26	SCL	3	Os03g0374575	SCL25b	SCL	2	EER97602
	OsSCL28	SCL	3	Os03g0363800	SCL28	SCL	1	KXG39307
	OsSCL57	SCL	11	Os11g0704700	SCL31	SCL	5	EES10309
	OsSCL57	SCL	11	Os11g0704700	SCL30	SCL	8	EES16196
	OsRS2Z36	RS2Z	5	Os05g0120100	RS2Z39	RS2Z	9	EES18924
	OsRS2Z37	RS2Z	1	Os01g0155600	RS2Z34	RS2Z	3	EES00292
	OsRS2Z37	RS2Z	1	Os01g0155600	RS2Z33	RS2Z	9	KXG21387
	RS2Z39	RS2Z	5	Os05g0162600	SR27	SR	3	KXG32406
	RS2Z39	RS2Z	5	Os05g0162600	RS2Z34	RS2Z	3	EES00292
	RS2Z39	RS2Z	5	Os05g0162600	RS2Z33	RS2Z	9	KXG21387
	OsRS29	RS	4	Os04g0118900	RS28	RS	6	EES11769
	OsRS33	RS	2	Os02g0122800	RS34	RS	4	EES06200
	OsSR45	SR45	1	Os01g0959000	SR45	SR45	3	EES02086
Oryza sativa-Triticum aestivum	OsSR33a	SR	5	Os05g0364600	TaSR4A	SR	1A	TraesCS1A02G229900
	OsSR33a	SR	5	Os05g0364600	TaSR4B	SR	1B	TraesCS1B02G244200
	OsSR33a	SR	5	Os05g0364600	TaSR4D	SR	1D	TraesCS1D02G232100
	OsSR33	SR	7	Os07g0673500	TaSR4D	SR	1D	TraesCS1D02G232100
	OsSR33	SR	7	Os07g0673500	TaSR7A	SR	2A	TraesCS2A02G111600
	OsSR33	SR	7	Os07g0673500	TaSR6B	SCL	2B	TraesCS2B02G130400
	OsSR33	SR	7	Os07g0673500	TaSR7D	SR	2D	TraesCS2D02G112200
	OsSR33	SR	7	Os07g0673500	TaSR14D	SR	4D	TraesCS4D02G168700
	OsSR32	SR	3	Os03g0344100	TaSR7A	SR	2A	TraesCS2A02G111600
	OsSR32	SR	3	Os03g0344100	TaSR6B	SCL	2B	TraesCS2B02G130400
	OsSR32	SR	3	Os03g0344100	TaSR7D	SR	2D	TraesCS2D02G112200
	OsSR32	SR	3	Os03g0344100	TaSR14D	SR	4D	TraesCS4D02G168700
	OsSR40	SR	1	Os01g0316600	TaSR4A	SR	1A	TraesCS1A02G229900
	OsSR40	SR	1	Os01g0316600	TaSR4A	SR	1A	TraesCS1A02G229900
	OsRSZ21a	RSZ	6	Os06g0187900				TraesCS6B02G382600
	OsRSZ21a	RSZ	6	Os06g0187900				TraesCS6D02G332000
	OsRSZ21a	RSZ	6	Os06g0187900				TraesCS7A02G152800
	OsRSZ21a	RSZ	6	Os06g0187900				TraesCS7B02G056600
	OsRSZ21	RSZ	2	Os02g0789400	TaSR17A	RSZ	6A	TraesCS6A02G349500
	OsRSZ21	RSZ	2	Os02g0789400				TraesCS6B02G382600
	OsRSZ21	RSZ	2	Os02g0789400				TraesCS6D02G332000
	OsRSZ21	RSZ	2	Os02g0789400				TraesCS7A02G152800
	OsRSZ21	RSZ	2	Os02g0789400				TraesCS7B02G056600
	OsRSZ23	RSZ	2	Os02g0610600				TraesCS6A02G219000
	OsRSZ23	RSZ	2	Os02g0610600	TaSR17B	RSZ	6B	TraesCS6B02G248500
	OsRSZ23	RSZ	2	Os02g0610600	TaSR17D	RSZ	6D	TraesCS6D02G202100
	OsSC32	SC	7	Os07g0623300				TraesCS2A02G162700
	OsSC32	SC	7	Os07g0623300	TaSR8B	SC	2B	TraesCS2B02G188600
	OsSC32	SC	7	Os07g0623300	TaSR8D	SC	2D	TraesCS2D02G169700
	OsSC25	SC	3	Os03g0388000				TraesCS2A02G162700
	OsSC25	SC	3	Os03g0388000	TaSR8B	SC	2B	TraesCS2B02G188600
	OsSC25	SC	3	Os03g0388000	TaSR8D	SC	2D	TraesCS2D02G169700
	OsSCL25	SCL	7	Os07g0633200	TaSR6A	SCL	2A	TraesCS2A02G155100
	OsSCL25	SCL	7	Os07g0633200	TaSR7B	SR	2B	TraesCS2B02G180200
	OsSCL25	SCL	7	Os07g0633200	TaSR6D	SCL	2D	TraesCS2D02G160400
	OsSCL26	SCL	3	Os03g0374575	TaSR6A	SCL	2A	TraesCS2A02G155100
	OsSCL26	SCL	3	Os03g0374575	TaSR7B	SR	2B	TraesCS2B02G180200
	OsSCL26	SCL	3	Os03g0374575	TaSR6D	SCL	2D	TraesCS2D02G160400
	OsSCL28	SCL	3	Os03g0363800	TaSR13D	SCL	4D	TraesCS4D02G162900
	OsSCL57	SCL	11	Os11g0704700	TaSR12A	SCL	4A	TraesCS4A02G176000
	OsSCL57	SCL	11	Os11g0704700	TaSR12D	SCL	4D	TraesCS4D02G136700
	OsSCL57	SCL	11	Os11g0704700	TaSR15B	SCL	5B	TraesCS5B02G087000
	OsSCL57	SCL	11	Os11g0704700				TraesCS5D02G093200
	OsRS2Z36	RS2Z	5	Os05g0120100	TaSR2A	RS2Z	1A	TraesCS1A02G049700
	OsRS2Z36	RS2Z	5	Os05g0120100	TaSR2B	RS2Z	1B	TraesCS1B02G065900
	OsRS2Z36	RS2Z	5	Os05g0120100	TaSR2D	RS2Z	1D	TraesCS1D02G051900
	OsRS2Z37	RS2Z	1	Os01g0155600	TaSR3B	RS2Z	1B	TraesCS1B02G130200
	OsRS2Z37	RS2Z	1	Os01g0155600	TaSR3D	RS2Z	1D	TraesCS1D02G111000
	OsRS2Z37	RS2Z	1	Os01g0155600				TraesCS3A02G308000
	OsRS2Z37	RS2Z	1	Os01g0155600				TraesCS3B02G151100
	OsRS2Z37	RS2Z	1	Os01g0155600				TraesCS3D02G134500
	RS2Z39	RS2Z	5	Os05g0162600	TaSR3B	RS2Z	1B	TraesCS1B02G130200
	RS2Z39	RS2Z	5	Os05g0162600	TaSR3D	RS2Z	1D	TraesCS1D02G111000
	OsRS29	RS	4	Os04g0118900				TraesCS2A02G009400
	OsRS29	RS	4	Os04g0118900	TaSR5D	RS	2D	TraesCS2D02G010300
	OsRS33	RS	2	Os02g0122800	TaSR16A	RS	6A	TraesCS6A02G065400
	OsRS33	RS	2	Os02g0122800				TraesCS6B02G088500
	OsRS33	RS	2	Os02g0122800	TaSR16D	RS	Un	TraesCSU02G119700
	OsSR45a	SR45	5	Os05g0105900				TraesCS1A02G017000
	OsSR45a	SR45	5	Os05g0105900	TaSR1B	SR45	1B	TraesCS1B02G021200
	OsSR45a	SR45	5	Os05g0105900	TaSR1D	SR45	1D	TraesCS1D02G016600
	OsSR45	SR45	1	Os01g0959000	TaSR10A	SR45	3A	TraesCS3A02G500500
	OsSR45	SR45	1	Os01g0959000	TaSR10B	SR45	3B	TraesCS3B02G564200
	OsSR45	SR45	1	Os01g0959000	TaSR10D	SR45	3D	TraesCS3D02G507900
Oryza sativa-Zea mays	OsSR33a	SR	5	Os05g0364600	SRp30	SR	3	Zm00001eb130650
	OsSR33a	SR	5	Os05g0364600	SRp31	SR	6	Zm00001eb285560
	OsSR33	SR	7	Os07g0673500	SRp32	SR	9	Zm00001eb394920
	OsSR32	SR	3	Os03g0344100	SRp32	SR	9	Zm00001eb394920
	OsSR40	SR	1	Os01g0316600	SRp30	SR	3	Zm00001eb130650
	OsSR40	SR	1	Os01g0316600	SRp31	SR	6	Zm00001eb285560
	OsRSZ21a	RSZ	6	Os06g0187900			4	Zm00001eb192700
	OsRSZ21a	RSZ	6	Os06g0187900	RSZ20	RSZ	5	Zm00001eb257500
	OsRSZ21a	RSZ	6	Os06g0187900			9	Zm00001eb374380
	OsRSZ21	RSZ	2	Os02g0789400			4	Zm00001eb192700
	OsRSZ21	RSZ	2	Os02g0789400	RSZ20	RSZ	5	Zm00001eb257500
	OsRSZ21	RSZ	2	Os02g0789400			9	Zm00001eb374380
	OsRSZ23	RSZ	2	Os02g0610600	RSZ23	RSZ	4	Zm00001eb184410
	OsRSZ23	RSZ	2	Os02g0610600	RSZ28I	RSZ	5	Zm00001eb246800
	OsSC34	SC	8	Os08g0486200	SC32	SC	1	Zm00001eb033600
	OsSC34	SC	8	Os08g0486200	SC30	SC	4	Zm00001eb199160
	OsSC32	SC	7	Os07g0623300	SC26	SC	1	Zm00001eb018860
	OsSC32	SC	7	Os07g0623300	SC35	SC	2	Zm00001eb109680
	OsSC32	SC	7	Os07g0623300	SC35	SC	7	Zm00001eb327870
	OsSC25	SC	3	Os03g0388000	SC26	SC	1	Zm00001eb018860
	OsSC25	SC	3	Os03g0388000	SC35	SC	2	Zm00001eb109680
	OsSC25	SC	3	Os03g0388000	SC35	SC	7	Zm00001eb327870
	OsSCL25	SCL	7	Os07g0633200			1	Zm00001eb018140
	OsSCL25	SCL	7	Os07g0633200	SCL25B	SCL	7	Zm00001eb328450
	OsSCL25	SCL	7	Os07g0633200	SCL25A	SCL	9	Zm00001eb394060
	OsSCL26	SCL	3	Os03g0374575				Zm00001eb018140
	OsSCL26	SCL	3	Os03g0374575	SCL25B	SCL	7	Zm00001eb328450
	OsSCL26	SCL	3	Os03g0374575	SCL25A	SCL	9	Zm00001eb394060
	OsSCL30	SCL	12	Os12g0572400	SCL30	SCL	4	Zm00001eb164590
	OsSCL28	SCL	3	Os03g0363800	SCL28	SCL	1	Zm00001eb017780
	OsSCL57	SCL	11	Os11g0704700	SCL30	SCL		Zm00001eb164590
	OsRS2Z36	RS2Z	5	Os05g0120100	RS2Z35	RS2Z	6	Zm00001eb265810
	OsRS2Z37	RS2Z	1	Os01g0155600	RS2Z33	RS2Z	6	Zm00001eb282350
	OsRS2Z39	RS2Z	5	Os05g0162600	RS2Z33	RS2Z		Zm00001eb282350
	OsRS29	RS	4	Os04g0118900	RS31A	RS	2	Zm00001eb089060
	OsRS33	RS	2	Os02g0122800			4	Zm00001eb208490
	OsRS33	RS	2	Os02g0122800	RSp41	RS	5	Zm00001eb230540
	OsSR45a	SR45	5	Os05g0105900	SR45_2	SR45	8	Zm00001eb362580
	OsSR45	SR45	1	Os01g0959000	SR45_1	SR45	3	Zm00001eb140450
	OsSR45	SR45	1	Os01g0959000	SR45_2	SR45	8	Zm00001eb362580
