# Supplementary material for: Comprehensive study of serine/arginine-rich (SR) gene family in rice: characterization, evolution and expression analysis
Source: PeerJ. 2023 Oct 13;11:e16193. doi: 10.7717/peerj.16193 (PMC10578304; doi:10.7717/peerj.16193)
Supplement: Supplemental Information 5 [file peerj-11-16193-s005.xlsx]

## Sheet: Sheet1
Table S5 Cis-acting elements in promoter regions of OsSR genes.
	Element	Sequence	Function	OsSCL30a	OsSCL30	OsSCL57	OsSCL28	OsSCL25	OsSCL26	OsSC32	OsSC34	OsSC25	OsSR45a	OsSR45	OsRS2Z39	OsRS2Z37	OsRS2Z36	OsRS2Z38	OsRSZ21a	OsRSZ21	OsRSZ23	OsRS29	OsRS33	OsSR33	OsSR32	OsSR33a	OsSR40
Promoter/enhancer element	TATA-box	TATATA/ATATAT/TATA/TATAA/ATTATA/TATACA/ATTATA/TATTTAAA/TACAAAA/TATAAAT/ATATAA/TATAA/TACAAAA	core promoter element around -30 of transcription start	11	111	50	1	11	20	24	21	54	50	19	26	17	33	12	3	15	56	43	24	8	37	2	82
	CAAT-box	CAAAT/CAAT/CCAAT/CCCAATTT/CAACCAACTCC/CAAAT/TGCCAAC/CCCAATTT	common cis-acting element in promoter and enhancer regions	15	7	18	4	10	34	37	20	33	36	34	28	35	32	15	17	11	22	29	37	19	28	25	29
	AT-rich sequence	TAAAATACT	element for maximal elicitor-mediated activation (2copies)	0	0	1	0	0	0	0	0	0	0	0	1	0	0	0	0	0	0	0	0	0	2	0	0
	A-box	CCGTCC	cis-acting regulatory element	0	0	0	3	1	2	0	2	0	0	1	2	1	2	0	0	1	0	0	0	0	2	1	0
	AT-rich element	ATAGAAATCAA	binding site of AT-rich DNA binding protein (ATBP-1)	0	0	0	0	0	1	0	0	0	0	0	0	0	0	0	0	0	0	0	0	0	0	0	0
Light responsiveness	3-AF1 binding site	TAAGAGAGGAA	light responsive element	1	0	0	0	0	0	0	0	0	0	0	0	0	0	0	0	1	0	0	0	0	0	0	0
	TCCC-motif	TCTCCCT	part of a light responsive element	3	1	0	0	0	1	0	1	0	0	0	0	0	0	1	0	1	1	0	0	0	0	0	0
	Gap-box	CAAATGAA(A/G)A	part of a light responsive element	1	0	0	0	0	0	0	1	0	0	0	0	0	1	0	0	0	0	0	0	0	0	0	0
	GATA-motif	GATAGGG/AAGGATAAGG/AAGATAAGATT/GATAGGA	part of a light responsive element	2	0	1	0	1	2	0	1	0	1	0	1	1	1	2	0	0	0	1	1	1	0	1	0
	GA-motif	ATAGATAA	part of a light responsive element	1	0	0	0	0	0	0	0	0	0	0	0	0	0	0	0	0	0	0	0	0	0	0	0
	ACE	GCGACGTACC	cis-acting element involved in light responsiveness	1	0	0	0	0	1	0	0	0	0	0	0	0	0	0	0	0	0	0	0	0	0	0	0
	Sp1	GGGCGG	light responsive element	1	0	0	0	0	2	1	1	1	0	1	4	4	5	0	2	2	1	0	3	0	3	0	0
	G-box	CACGAC/TAACACGTAG/TACGTG/CACGAC/CACGTC/ACACGTGT/CACGTG/tgACACGTGGCA/CACGTT/GCCACGTGGA/TCCACATGGCA/CCACGTAA	cis-acting regulatory element involved in light responsiveness	8	3	1	0	1	1	1	9	0	2	3	0	5	6	2	1	6	1	3	1	4	7	4	4
	TCT-motif	TCTTAC	part of a light responsive element	2	2	1	0	0	2	0	1	1	0	1	1	1	1	1	1	3	1	4	0	0	1	0	1
	Box 4	ATTAAT	part of a conserved DNA module involved in light responsiveness	0	2	1	0	1	1	1	1	0	0	2	4	1	1	0	0	0	2	0	0	0	0	0	7
	AE-box	AGAAACTT/AGAAACAA	part of a module for light response	0	1	1	0	0	0	1	1	0	0	0	0	0	0	0	0	0	0	0	0	0	0	0	0
	ATCT-motif	AATCTAATCC	part of a conserved DNA module involved in light responsiveness	0	1	0	0	0	0	0	0	0	0	0	0	0	0	0	1	0	0	0	0	0	0	0	0
	I-box	GTATAAGGCC/atGATAAGGTC/gGATAAGGTG/AGATAAGG/cCATATCCAAT/	part of a light responsive element	0	0	1	0	0	1	0	0	0	0	0	0	0	0	1	1	0	0	1	2	1	1	0	1
	chs-CMA1a	TTACTTAA	part of a light responsive element	0	0	1	1	0	0	0	0	0	0	0	0	0	0	0	0	0	0	0	0	0	0	0	0
	GT1-motif	GGTTAA	light responsive element	0	0	0	0	0	2	1	0	1	0	1	0	2	0	0	0	1	1	0	0	3	0	0	2
	ACE	CTAACGTATT	cis-acting element involved in light responsiveness	0	0	0	0	0	0	2	0	0	0	0	0	0	0	0	0	0	0	0	0	0	0	0	1
	AT1-motif	AATTATTTTTTATT	part of a light responsive module	0	0	0	0	0	0	0	0	1	0	0	0	0	0	0	0	0	1	0	0	0	0	0	0
	MRE	AACCTAA	MYB binding site involved in light responsiveness	0	0	0	0	0	0	0	0	1	2	1	0	0	1	0	0	1	0	0	1	0	0	0	0
	AE-box	AGAAACAA	part of a module for light response	0	0	0	0	0	0	0	0	1	0	0	0	0	0	0	0	0	1	0	0	0	0	0	0
	ATC-motif	AGTAATCT/TGCTATCCA	part of a conserved DNA module involved in light responsiveness	0	0	0	0	0	0	0	0	0	0	0	0	0	0	1	0	1	0	1	0	0	1	0	0
	Box II	CCACGTGGC	part of a light responsive element	0	0	0	0	0	0	0	0	0	0	0	0	0	0	0	0	2	0	0	0	0	0	0	0
	LAMP-element	CTTTATCA	part of a light responsive element	0	0	0	0	0	0	0	0	0	0	0	0	0	0	0	0	0	0	0	1	0	0	0	0
	ATCT-motif	AATCTAATCC	part of a conserved DNA module involved in light responsiveness	0	0	0	0	0	0	0	0	0	0	0	0	0	0	0	0	0	0	0	0	1	0	0	0
	ACA-motif	AATCACAACCATA	part of gapA in (gapA-CMA1) involved with light responsiveness	0	0	0	0	0	0	0	0	0	0	0	0	0	0	0	0	0	0	0	0	0	1	0	0
	C-box	ACGAGCACCGCC	cis-acting regulatory element involved in light responsiveness	0	0	0	0	0	0	0	0	0	0	0	0	0	0	0	0	0	0	0	0	0	0	1	0
Stress	GC-motif	CCCCCG	enhancer-like element involved in anoxic specific inducibility	1	0	0	1	0	2	0	4	0	0	2	2	0	1	1	2	0	1	0	1	0	2	0	1
	MBS	CAACTG	MYB binding site involved in drought-inducibility	1	0	0	1	0	0	1	2	1	1	1	2	0	1	1	0	1	0	1	0	0	0	1	1
	TC-rich repeats	ATTCTCTAAC/GTTTTCTTAC	cis-acting element involved in defense and stress responsiveness	0	2	0	2	0	1	0	0	1	0	0	0	1	1	1	0	0	0	0	0	1	0	0	0
	ARE	AAACCA	cis-acting regulatory element essential for the anaerobic induction	3	0	0	1	0	0	0	4	1	1	0	0	0	1	3	2	4	3	4	3	0	2	2	2
	LTR	CCGAAA	cis-acting element involved in low-temperature responsiveness	0	0	0	0	0	1	0	0	0	3	0	1	1	0	0	1	2	1	0	0	0	0	0	1
Hormone response	CGTCA-motif	CGTCA	cis-acting regulatory element involved in the MeJA-responsiveness	2	3	0	3	1	4	0	3	3	0	2	0	2	3	0	6	4	2	1	0	4	3	4	2
	TCA-element	CCATCTTTTT/TCAGAAGAGG	cis-acting element involved in salicylic acid responsiveness	1	0	1	0	0	0	0	3	1	1	2	1	0	0	0	0	0	0	1	2	0	2	0	1
	TGA-element	AACGAC	auxin-responsive element	1	1	1	0	1	1	0	0	0	0	0	1	1	0	0	2	0	0	0	0	0	0	0	0
	TGACG-motif	TGACG	cis-acting regulatory element involved in the MeJA-responsiveness	2	3	0	0	1	4	0	3	3	0	2	0	2	3	0	0	0	2	1	0	0	3	4	2
	ABRE	ACGTG/GCAACGTGTC/AACCCGG/TACGGTC/GACACGTGGC/CACGTG/GCCGCGTGGC/GACACGTACGT/CGTACGTGCA	cis-acting element involved in the abscisic acid responsiveness	5	4	2	2	4	1	2	11	0	5	2	0	3	4	2	2	5	1	2	1	3	7	5	0
	P-box	CCTTTTG	gibberellin-responsive element	0	1	0	0	2	0	0	0	1	0	0	0	0	0	0	0	0	0	0	3	1	0	0	0
	TATC-box	TATCCCA	cis-acting element involved in gibberellin-responsiveness	0	2	0	0	0	0	0	0	0	0	0	0	0	0	0	0	0	0	0	2	0	0	0	6
	TGACG-motif	TGACG	cis-acting regulatory element involved in the MeJA-responsiveness	0	0	0	3	0	0	0	0	0	0	0	0	0	0	0	6	4	0	0	0	4	0	0	0
	GARE-motif	TCTGTTG	gibberellin-responsive element	0	0	0	0	1	0	0	0	0	0	1	0	2	0	0	1	0	0	1	0	2	0	1	0
	AuxRR-core	GGTCCAT	cis-acting regulatory element involved in auxin responsiveness	0	0	0	0	0	0	0	0	0	1	0	0	0	0	0	2	0	1	0	0	0	0	0	1
Development/tissue specificity	O2-site	GTTGACGTGA/GATGACATGG/GATGA(C/T)(A/G)TG(A/G)/GATGATGTGG	cis-acting regulatory element involved in zein metabolism regulation	1	2	0	0	2	1	0	0	0	2	0	1	0	0	0	4	1	3	0	0	1	0	0	1
	CAT-box	GCCACT	cis-acting regulatory element related to meristem expression	0	1	3	0	3	1	1	1	2	0	0	0	0	0	1	0	0	1	0	0	3	0	1	1
	GCN4_motif	TGAGTCA	cis-regulatory element involved in endosperm expression	0	1	0	0	0	0	0	2	0	0	0	0	0	0	0	0	0	0	0	0	0	0	0	0
	MSA-like	TCCAACGGT	cis-acting element involved in cell cycle regulation	0	0	0	0	0	1	0	0	0	0	0	0	0	0	0	0	0	0	0	0	0	0	0	0
	HD-Zip 1	CAAT(A/T)ATTG	element involved in differentiation of the palisade mesophyll cells	0	0	0	0	0	0	0	0	1	0	0	0	0	0	0	0	0	0	0	0	0	0	0	0
	RY-element	CATGCATG	cis-acting regulatory element involved in seed-specific regulation	0	0	0	0	0	0	0	0	0	0	1	0	0	0	0	0	0	0	0	0	1	0	0	0
	A-box	AATAACAAACTCC	sequence conserved in alpha-amylase promoters	0	0	0	0	0	0	0	0	0	0	0	0	0	0	0	0	0	0	1	0	0	0	0	0
	AACA_motif	TAACAAACTCCA	involved in endosperm-specific negative expression	0	0	0	0	0	0	0	0	0	0	0	0	0	0	0	0	0	0	1	0	0	0	0	0
	NON-box	AGATCGACG	cis-acting regulatory element related to meristem specific activation	0	0	0	0	0	0	0	0	0	0	0	0	0	0	0	0	0	0	0	0	0	0	0	1
Circadian control	circadian	CAAAGATATC	cis-acting regulatory element involved in circadian control	1	0	0	0	0	0	0	0	0	0	0	0	0	0	0	0	0	0	1	0	0	0	0	0
(1) The The number in the table represents the number of corresponding elements.
