# Supplementary material for: Comprehensive study of serine/arginine-rich (SR) gene family in rice: characterization, evolution and expression analysis
Source: PeerJ. 2023 Oct 13;11:e16193. doi: 10.7717/peerj.16193 (PMC10578304; doi:10.7717/peerj.16193)
Supplement: Supplemental Information 6 [file peerj-11-16193-s006.xlsx]

## Sheet: Sheet1
Table S6 Primers for qRT-PCR.
Genes	Primers	Sequences (5' → 3')
OsSCL30a	Forward primer	ATGAGGAGGTATAGTCCACCTTATC
	Reverse primer	GAGACTGCCAGAACCCTGTTC
OsSCL30	Forward primer	GAGGTACAGCCCACCATATC
	Reverse primer	TTAATGGGATGTTGCGGACCAA
OsSCL57	Forward primer	AAGACTACAACACTGGGGAGC
	Reverse primer	TGTCTGCACAGCAAAAGCAAC
OsSCL28	Forward primer	GAATCACTCTCTCCACATGGTCA
	Reverse primer	GATGGAGATACATGACGCTCG
OsSCL25	Forward primer	ATGGGGAGAGGCTACAGTTAC
	Reverse primer	GGGAGATCTCTACCACGTCC
OsSCL26	Forward primer	TATGATTATGGTCCATCACCGC
	Reverse primer	AATGGTCTTCGTAGATCATCAGG
OsSC32	Forward primer	TACCGTGATGACTATCGGGAGA
	Reverse primer	TCCTGCTACGACTCAGGC
OsSC34	Forward primer	CAGAGATGACCACAGAGATAGAGAAC
	Reverse primer	CTCTTCCTCTACGACGGTTCTTGTA
OsSC25	Forward primer	TAGACCGGAGCCTTGTCTGC
	Reverse primer	GGAAGCAGCCTTGGATGCTC
OsSR45a	Forward primer	TGAGTCCACCGTCCTCCATG
	Reverse primer	AAGATTGACCACCCTATCCATG
OsSR45	Forward primer	AATCAGTTGTTCTCCACATTGATC
	Reverse primer	AGGAAGGTTGACCATTCGATC
OsRS2Z39	Forward primer	CAAAATGTCTCGGTATGTTGACCC
	Reverse primer	AAATCGCACCCTCCCATATC
OsRS2Z37	Forward primer	CGAGGCTGTACGTAGGTCG
	Reverse primer	TCCACATATCGCACTCTCCC
OsRS2Z36	Forward primer	GAGTCTTAGTTACAGCAGGAGTCCC
	Reverse primer	GCTGTCACCGTGATCTGAG
OsRS2Z38	Forward primer	GATATGGAAGAATACGTGAAGTGG
	Reverse primer	CTGCCATCTAGGTTATACCGC
OsRSZ21a	Forward primer	AGATGGCAAGAATGGATGGAGA
	Reverse primer	AAGTGCCCAGTCTCACCAC
OsRSZ21	Forward primer	TGCTCGTGAATGTCGTTTG
	Reverse primer	TAGCTTCTTCTACCATAGGTCGG
OsRSZ23	Forward primer	CTCGAGCTTAAAACCCTAGAGC
	Reverse primer	GGTTTTCTAGCAACCCATACAC
OsRS29	Forward primer	CACAAAAGCACTTGAAGCTACT
	Reverse primer	TGTATCATCCCTGAAGGCATAC
OsRS33	Forward primer	GTTGCTTGTCCTAAAATGAGGC
	Reverse primer	CGTCCATATTTGCTGAAGAGGC
OsSR33	Forward primer	GACGTCGTGGGGGTGTATCTA
	Reverse primer	AGTACCACCACCCTCACGGTA
OsSR32	Forward primer	ATTGACTTGAAGATCCCTCCGAG
	Reverse primer	GTTATAACCATCCCTGCCAGC
OsSR33a	Forward primer	GGCCGTATTGTGGATATTGACT
	Reverse primer	CATGACGGCCATAAATTGCAT
OsSR40	Forward primer	AGTCTGATTGAACATGAAAACCCT
	Reverse primer	TACTGGGACTATGACTACAGAACACAT
OsActin	Forward primer	ACCACAGGTATTGTGTTGGACTC
	Reverse primer	AGAGCATATCCTTCATAGATGGG
