# Supplementary material for: Comprehensive study of serine/arginine-rich (SR) gene family in rice: characterization, evolution and expression analysis
Source: PeerJ. 2023 Oct 13;11:e16193. doi: 10.7717/peerj.16193 (PMC10578304; doi:10.7717/peerj.16193)
Supplement: Supplemental Information 7 [file peerj-11-16193-s007.xlsx]

## Sheet: Sheet1
Table S7 Primers for RT-PCR.
Genes	Primers	Sequences (5'→3')
OsSCL30a	Forward primer	AACAGGGTTCTGGCAGTCTCC
	Reverse primer	GAACGACGGCCTTCATGGTCAG
OsSCL25	Forward primer	TGACCGTTATGGTGGACGTGG
	Reverse primer	TCCTTGATCTGCTCTCAACTGG
OsSC34	Forward primer	CAGAGATGACCACAGAGATAGAGAAC
	Reverse primer	ATCATCCATCATGGGCGATCC
OsRS2Z37	Forward primer	GCAACACGAGGCTGTACGTAG
	Reverse primer	TACGGCTATCCCTCCTTGGAG
OsRS2Z36	Forward primer	TTCTCGTGACCTAGAATACCATTTC
	Reverse primer	ACTGCGATTAAATTTCAGGCTTC
OsRS2Z38	Forward primer	CTTCCGCCGCATCCTCTATC
	Reverse primer	CATCACCATTTCCATCCCTAGGG
OsRSZ21	Forward primer	GGTCGTGATCGACATGGTGG
	Reverse primer	ATGCAGACAGAGCCGGTAGT
OsRS29	Forward primer	TCGACTACGACACCCGCCAC
	Reverse primer	AGCCATCAAGGGCTCGTATG
OsRS33	Forward primer	GGAGGAGACCTAGGGTTTCCTCG
	Reverse primer	CCATTGATCTGAAGCAGGAAGGTG
OsSR32	Forward primer	AGCCGGACGATCTACGTGG
	Reverse primer	GATCGAGATCGAGATCGGGATGC
OsSR33a	Forward primer	ACAAGATGCAATTTATGGCCG
	Reverse primer	GAGATGGGGATCGGGATAAACTTC
OsActin	Forward primer	ACCACAGGTATTGTGTTGGACTC
	Reverse primer	AGAGCATATCCTTCATAGATGGG
