# Supplementary material for: Comprehensive study of serine/arginine-rich (SR) gene family in rice: characterization, evolution and expression analysis
Source: PeerJ. 2023 Oct 13;11:e16193. doi: 10.7717/peerj.16193 (PMC10578304; doi:10.7717/peerj.16193)
Supplement: Supplemental Information 8 [file peerj-11-16193-s008.xlsx]

## Sheet: Sheet1
Table S8 Summary of changes in the expression of the rice serine/arginine-rich (SR) genes in response to abiotic stresses.
Stress treatment	Differential expression of OsSR genes
	Up-regulated	Down-regulated
Salt stress	OsRS2Z38; OsRSZ21a;OsRSZ23; OsRS29; OsRS33;OsSR32	OsSCL28; OsSC32; OsSR45a; OsRS2Z37; OsRSZ21
Drought stress	OsSCL28; OsSCL26; OsSC25;OsSR45a; OsRSZ21a; OsRS33
Cold stress	OsSC25; OsSR45a; OsRSZ21a; OsSR33	OsSCL30; OsSCL28; OsSCL26; OsRSZ23
Heat stress	OsSCL25; OsSC32; OsRS29	OsSCL30a; OsSCL30; OsSCL26; OsRS2Z37; OsRSZ23; OsRS33
	OsSR genes in response to more than one stress treatment
Salt stress and drought stress	OsSCL28: down-regulated in response to salt; up-regulated in response to drought
	OsSR45a: down-regulated in response to salt; up-regulated in response to drought
	OsRSZ21a: up-regulated in response to salt/drought
	OsRS33: up-regulated in response to salt/drought
Salt stress and cold stress	OsSR45a: down-regulated in response to salt; up-regulated in response to cold
	OsRSZ21a: up-regulated in response to salt/cold
	OsSCL28: down-regulated in response to salt/cold
	OsRSZ23: up-regulated in response to salt; down-regulated in response to cold
Salt stress and heat stress	OsSC32: down-regulated in response to salt; up-regulated in response to heat
	OsRS29: up-regulated in response to salt/heat
	OsRS2Z37: down-regulated in response to salt/heat
	OsRSZ23: up-regulated in response to salt; down-regulated in response to heat
	OsRS33: up-regulated in response to salt; down-regulated in response to heat
Drought stress and cold stress	OsSCL28: up-regulated in response to drought; down-regulated in response to cold
	OsSCL26: up-regulated in response to drought; down-regulated in response to cold
	OsSC25: up-regulated in response to drought/cold
	OsSR45a: up-regulated in response to drought/cold
	OsRSZ21a: up-regulated in response to drought/cold
Drought stress and heat stress	OsSCL26: up-regulated in response to drought; down-regulated in response to heat
	OsRS33: up-regulated in response to drought; down-regulated in response to heat
Cold stress and heat stress	OsSCL30: down-regulated in response to cold/heat
	OsSCL26: down-regulated in response to cold/heat
	OsRSZ23: down-regulated in response to cold/heat
Salt stress, drought stress and cold stress	OsSCL28: down-regulated in response to salt; up-regulated in response to drought/cold
	OsSR45a: down-regulated in response to salt; up-regulated in response to drought/cold
	OsRSZ21a: up-regulated in response to salt/drought/cold
Salt stress, drought stress and heat stress	OsRS33: up-regulated in response to salt/drought; down-regulated in response to heat
Salt stress, cold stress and heat stress	OsRSZ23: up-regulated in response to salt; down-regulated in response to cold/heat
Drought stress, cold stress and heat stress	OsSCL26: up-regulated in response to drought; down-regulated in response to cold/heat
GA	OsSCL28, OsSCL25, OsSR45a, OsRSZ21, OsSR33, OsSR32 and OsSR33a	OsRS2Z38
ABA	OsSCL25, OsSC25, OsSR45a and OsRS2Z36
GA and ABA	OsSCL25 and OsSR45a
